# Supplementary material
Source: publisher site journal article supplement (https://www.dovepress.com/article/488523)
Supplement: Supplementary file 1 [file get_supplementary_file.php]

**Supplemental Material**

**Table S1. F-statistic for MR analysis**

| Exposure | R² | F-statistic |
| --- | --- | --- |
| Arm fat | 0.9789 | **60.88** |
| Body fat | 0.9790 | **58.41** |
| Leg fat | 0.9787 | **58.14** |
| Trunk fat | 0.9790 | **60.25** |
| Whole fat | 0.9792 | **62.03** |

**Table S2.A Summary of the SNPs (after clumping process) associated with fat mass of left arm (per SD increase)**

| **Exposure** | **SNP** | **Chromosome** | **Position** | **Effect allele** | **Other allele** | **beta** | **se** | **eaf** | **P val** | **Sample size** |
| --- | --- | --- | --- | --- | --- | --- | --- | --- | --- | --- |
| Arm fat mass (left) | rs7537581 | 1 | 2725475 | A | C | 0.0130857 | 0.00197968 | 0.531718 | 3.80E-11 | 454684 |
| Arm fat mass (left) | rs3766823 | 1 | 32197257 | A | G | 0.0175052 | 0.00259883 | 0.172024 | 1.60E-11 | 454684 |
| Arm fat mass (left) | rs194656 | 1 | 33423206 | A | G | -0.013765 | 0.00243269 | 0.203773 | 1.50E-08 | 454684 |
| Arm fat mass (left) | rs6669341 | 1 | 47678458 | G | A | -0.0168606 | 0.00198778 | 0.582708 | 2.20E-17 | 454684 |
| Arm fat mass (left) | rs12072739 | 1 | 98315893 | G | A | 0.0177658 | 0.00235329 | 0.224591 | 4.40E-14 | 454684 |
| Arm fat mass (left) | rs543874 | 1 | 177889480 | G | A | 0.047592 | 0.00242724 | 0.205273 | 1.30E-85 | 454684 |
| Arm fat mass (left) | rs4658403 | 1 | 243832560 | T | C | -0.0163623 | 0.00263522 | 0.833657 | 5.30E-10 | 454684 |
| Arm fat mass (left) | rs72634826 | 1 | 1601052 | A | G | -0.0179331 | 0.0022673 | 0.259879 | 2.60E-15 | 454684 |
| Arm fat mass (left) | rs4908672 | 1 | 7725414 | T | C | 0.0115075 | 0.0020102 | 0.392942 | 1.00E-08 | 454684 |
| Arm fat mass (left) | rs10799778 | 1 | 23313353 | G | T | -0.0199602 | 0.00263391 | 0.833687 | 3.50E-14 | 454684 |
| Arm fat mass (left) | rs113603865 | 1 | 39564930 | T | C | 0.0190899 | 0.00241319 | 0.212063 | 2.60E-15 | 454684 |
| Arm fat mass (left) | rs7519259 | 1 | 66434743 | A | G | 0.0141116 | 0.00197295 | 0.528345 | 8.50E-13 | 454684 |
| Arm fat mass (left) | rs3845344 | 1 | 75001480 | T | C | 0.0154683 | 0.0020085 | 0.391161 | 1.30E-14 | 454684 |
| Arm fat mass (left) | rs11165643 | 1 | 96924097 | T | C | 0.0205416 | 0.00199206 | 0.590149 | 6.20E-25 | 454684 |
| Arm fat mass (left) | rs1778830 | 1 | 156489974 | A | G | 0.0119019 | 0.0020446 | 0.362099 | 5.80E-09 | 454684 |
| Arm fat mass (left) | rs4844809 | 1 | 209519772 | C | G | 0.0169543 | 0.00289588 | 0.131992 | 4.80E-09 | 454684 |
| Arm fat mass (left) | rs2568958 | 1 | 72765116 | A | G | 0.020595 | 0.00200097 | 0.603665 | 7.60E-25 | 454684 |
| Arm fat mass (left) | rs116377258 | 1 | 110131521 | G | A | 0.0719127 | 0.00621139 | 0.025655 | 5.40E-31 | 454684 |
| Arm fat mass (left) | rs61813324 | 1 | 156049877 | T | C | 0.0274072 | 0.00290446 | 0.135711 | 3.90E-21 | 454684 |
| Arm fat mass (left) | rs79518326 | 1 | 174946883 | A | C | -0.0396317 | 0.00594826 | 0.028638 | 2.70E-11 | 454684 |
| Arm fat mass (left) | rs76702514 | 1 | 195148296 | G | C | -0.0154507 | 0.00241911 | 0.210647 | 1.70E-10 | 454684 |
| Arm fat mass (left) | rs17011141 | 1 | 222112634 | G | A | -0.0142484 | 0.00246289 | 0.20007 | 7.20E-09 | 454684 |
| Arm fat mass (left) | rs1205593 | 1 | 11252716 | C | T | -0.0144479 | 0.00229665 | 0.759345 | 3.20E-10 | 454684 |
| Arm fat mass (left) | rs1167311 | 1 | 49996959 | A | G | -0.0184922 | 0.00211908 | 0.681344 | 2.60E-18 | 454684 |
| Arm fat mass (left) | rs12140153 | 1 | 62579891 | T | G | -0.035588 | 0.00343902 | 0.094283 | 4.30E-25 | 454684 |
| Arm fat mass (left) | rs12033257 | 1 | 112318484 | G | A | -0.0136451 | 0.00203258 | 0.382352 | 1.90E-11 | 454684 |
| Arm fat mass (left) | rs67807996 | 1 | 149995265 | A | G | 0.0172407 | 0.00206827 | 0.395646 | 7.70E-17 | 454684 |
| Arm fat mass (left) | rs12034991 | 1 | 210145298 | G | A | 0.0114833 | 0.00203415 | 0.367772 | 1.60E-08 | 454684 |
| Arm fat mass (left) | rs2494196 | 1 | 219762581 | A | C | 0.0178689 | 0.0021693 | 0.286025 | 1.80E-16 | 454684 |
| Arm fat mass (left) | rs587271 | 1 | 54743111 | T | C | 0.0132379 | 0.00220551 | 0.686824 | 1.90E-09 | 454684 |
| Arm fat mass (left) | rs34517439 | 1 | 78450517 | A | C | 0.0440488 | 0.00303457 | 0.121689 | 9.60E-48 | 454684 |
| Arm fat mass (left) | rs12088284 | 1 | 80798635 | T | C | 0.0123601 | 0.00213631 | 0.300904 | 7.20E-09 | 454684 |
| Arm fat mass (left) | rs61828088 | 1 | 174768522 | A | G | 0.0171369 | 0.00312767 | 0.110452 | 4.30E-08 | 454684 |
| Arm fat mass (left) | rs815163 | 1 | 190294726 | C | T | -0.015538 | 0.00197502 | 0.563221 | 3.60E-15 | 454684 |
| Arm fat mass (left) | rs2678204 | 1 | 201800511 | G | T | 0.0219691 | 0.00206977 | 0.34018 | 2.60E-26 | 454684 |
| Arm fat mass (left) | rs10915840 | 1 | 225668524 | A | G | -0.0136344 | 0.00221002 | 0.274231 | 6.90E-10 | 454684 |
| Arm fat mass (left) | rs6429425 | 1 | 243590990 | T | G | -0.0164087 | 0.00282843 | 0.139682 | 6.60E-09 | 454684 |
| Arm fat mass (left) | rs35722922 | 2 | 47002226 | G | A | -0.0125463 | 0.00202182 | 0.383952 | 5.50E-10 | 454684 |
| Arm fat mass (left) | rs396354 | 2 | 86850022 | C | T | -0.0138574 | 0.00217886 | 0.715651 | 2.00E-10 | 454684 |
| Arm fat mass (left) | rs1446585 | 2 | 136407479 | G | A | -0.0141736 | 0.00223535 | 0.244601 | 2.30E-10 | 454684 |
| Arm fat mass (left) | rs6717858 | 2 | 165539661 | C | T | 0.0137587 | 0.00200045 | 0.401446 | 6.10E-12 | 454684 |
| Arm fat mass (left) | rs4482463 | 2 | 205375909 | A | C | -0.0311725 | 0.00368838 | 0.923057 | 2.90E-17 | 454684 |
| Arm fat mass (left) | rs13427822 | 2 | 213414265 | G | A | -0.0146685 | 0.00222957 | 0.271196 | 4.70E-11 | 454684 |
| Arm fat mass (left) | rs1840126 | 2 | 236896765 | C | A | -0.0113968 | 0.00197697 | 0.563606 | 8.20E-09 | 454684 |
| Arm fat mass (left) | rs111942358 | 2 | 242568017 | C | G | 0.0151956 | 0.00273235 | 0.153356 | 2.70E-08 | 454684 |
| Arm fat mass (left) | rs6545144 | 2 | 50241865 | A | T | -0.019381 | 0.00262258 | 0.83151 | 1.50E-13 | 454684 |
| Arm fat mass (left) | rs1160543 | 2 | 100832182 | T | C | -0.018147 | 0.00199907 | 0.400855 | 1.10E-19 | 454684 |
| Arm fat mass (left) | rs72917533 | 2 | 175238924 | C | T | -0.0181637 | 0.00252847 | 0.185527 | 6.80E-13 | 454684 |
| Arm fat mass (left) | rs2216931 | 2 | 181599070 | A | C | 0.0157753 | 0.00207502 | 0.661959 | 2.90E-14 | 454684 |
| Arm fat mass (left) | rs73985439 | 2 | 212299249 | C | A | 0.0138796 | 0.00212877 | 0.307328 | 7.00E-11 | 454684 |
| Arm fat mass (left) | rs6744646 | 2 | 628504 | G | A | 0.0505501 | 0.00259808 | 0.828319 | 2.60E-84 | 454684 |
| Arm fat mass (left) | rs13008033 | 2 | 142293511 | G | A | -0.0145579 | 0.00251954 | 0.185806 | 7.60E-09 | 454684 |
| Arm fat mass (left) | rs10201053 | 2 | 172889558 | G | A | -0.0151252 | 0.00214305 | 0.299395 | 1.70E-12 | 454684 |
| Arm fat mass (left) | rs1263629 | 2 | 207936911 | G | A | 0.0160624 | 0.00280909 | 0.143748 | 1.10E-08 | 454684 |
| Arm fat mass (left) | rs62190394 | 2 | 230624929 | T | C | 0.0173626 | 0.00210801 | 0.317039 | 1.80E-16 | 454684 |
| Arm fat mass (left) | rs7571496 | 2 | 6169351 | G | A | -0.0132516 | 0.00224237 | 0.260596 | 3.40E-09 | 454684 |
| Arm fat mass (left) | rs4605363 | 2 | 229010960 | C | A | 0.0155787 | 0.00206621 | 0.341585 | 4.70E-14 | 454684 |
| Arm fat mass (left) | rs62107261 | 2 | 422144 | C | T | -0.086255 | 0.0045845 | 0.048318 | 5.70E-79 | 454684 |
| Arm fat mass (left) | rs59086897 | 2 | 25145173 | A | T | 0.0284407 | 0.00195937 | 0.487597 | 9.70E-48 | 454684 |
| Arm fat mass (left) | rs935166 | 2 | 26949366 | A | G | -0.0159656 | 0.00196234 | 0.506862 | 4.10E-16 | 454684 |
| Arm fat mass (left) | rs3770821 | 2 | 36762126 | C | T | 0.0160526 | 0.00209252 | 0.332693 | 1.70E-14 | 454684 |
| Arm fat mass (left) | rs805412 | 2 | 54120820 | A | G | -0.0108819 | 0.00199058 | 0.416105 | 4.60E-08 | 454684 |
| Arm fat mass (left) | rs3806572 | 2 | 55238677 | A | G | -0.0137824 | 0.00216192 | 0.290873 | 1.80E-10 | 454684 |
| Arm fat mass (left) | rs1861410 | 2 | 58933591 | T | C | -0.0196428 | 0.00197864 | 0.555354 | 3.20E-23 | 454684 |
| Arm fat mass (left) | rs6545714 | 2 | 59307725 | A | G | -0.0212435 | 0.00200513 | 0.601471 | 3.20E-26 | 454684 |
| Arm fat mass (left) | rs2861685 | 2 | 67837553 | C | T | -0.0159296 | 0.00198715 | 0.412114 | 1.10E-15 | 454684 |
| Arm fat mass (left) | rs441792 | 2 | 105404221 | G | A | 0.0140549 | 0.00196582 | 0.486581 | 8.70E-13 | 454684 |
| Arm fat mass (left) | rs429343 | 2 | 147903382 | G | A | -0.0156965 | 0.00198682 | 0.576556 | 2.80E-15 | 454684 |
| Arm fat mass (left) | rs62246311 | 3 | 9498143 | A | G | 0.0225684 | 0.00323627 | 0.102327 | 3.10E-12 | 454684 |
| Arm fat mass (left) | rs1801282 | 3 | 12393125 | G | C | 0.0250625 | 0.00301706 | 0.119539 | 9.80E-17 | 454684 |
| Arm fat mass (left) | rs754635 | 3 | 42305131 | G | C | 0.0223252 | 0.00309106 | 0.886581 | 5.10E-13 | 454684 |
| Arm fat mass (left) | rs9968060 | 3 | 62471282 | T | C | 0.0142811 | 0.00208534 | 0.642604 | 7.50E-12 | 454684 |
| Arm fat mass (left) | rs6769617 | 3 | 62687746 | T | A | -0.0132767 | 0.0020773 | 0.663989 | 1.60E-10 | 454684 |
| Arm fat mass (left) | rs13340130 | 3 | 81790970 | T | A | 0.0120859 | 0.00206389 | 0.345042 | 4.70E-09 | 454684 |
| Arm fat mass (left) | rs9813745 | 3 | 88342206 | T | C | 0.0173244 | 0.00265927 | 0.837268 | 7.30E-11 | 454684 |
| Arm fat mass (left) | rs9839081 | 3 | 123051230 | A | G | -0.0126662 | 0.00212811 | 0.325076 | 2.70E-09 | 454684 |
| Arm fat mass (left) | rs73052033 | 3 | 185828465 | C | T | -0.0246361 | 0.00253075 | 0.185072 | 2.10E-22 | 454684 |
| Arm fat mass (left) | rs361222 | 3 | 12922716 | T | A | -0.0118931 | 0.00204393 | 0.632513 | 5.90E-09 | 454684 |
| Arm fat mass (left) | rs28350 | 3 | 42418446 | G | A | -0.0181315 | 0.00256712 | 0.820632 | 1.60E-12 | 454684 |
| Arm fat mass (left) | rs1554654 | 3 | 44044344 | T | C | -0.0123581 | 0.0019697 | 0.470572 | 3.50E-10 | 454684 |
| Arm fat mass (left) | rs7630382 | 3 | 85111108 | T | C | 0.0144578 | 0.00196955 | 0.531591 | 2.10E-13 | 454684 |
| Arm fat mass (left) | rs3911063 | 3 | 85906928 | C | T | -0.0168877 | 0.00210437 | 0.321997 | 1.00E-15 | 454684 |
| Arm fat mass (left) | rs2291127 | 3 | 138122477 | T | C | -0.0162475 | 0.00270172 | 0.156217 | 1.80E-09 | 454684 |
| Arm fat mass (left) | rs8192675 | 3 | 170724883 | C | T | 0.0175143 | 0.00216211 | 0.288659 | 5.50E-16 | 454684 |
| Arm fat mass (left) | rs7619139 | 3 | 25110415 | A | T | 0.014752 | 0.0019989 | 0.588653 | 1.60E-13 | 454684 |
| Arm fat mass (left) | rs75384631 | 3 | 35141900 | A | T | 0.0174452 | 0.00310473 | 0.114131 | 1.90E-08 | 454684 |
| Arm fat mass (left) | rs1436348 | 3 | 104612668 | G | A | 0.0145365 | 0.00198975 | 0.582744 | 2.80E-13 | 454684 |
| Arm fat mass (left) | rs11709402 | 3 | 131551027 | G | A | 0.021339 | 0.00219578 | 0.278618 | 2.50E-22 | 454684 |
| Arm fat mass (left) | rs6774894 | 3 | 196116393 | A | T | 0.0134667 | 0.0020448 | 0.358081 | 4.50E-11 | 454684 |
| Arm fat mass (left) | rs17668356 | 3 | 61208619 | G | C | -0.0217044 | 0.0027769 | 0.145995 | 5.50E-15 | 454684 |
| Arm fat mass (left) | rs6782714 | 3 | 71684845 | T | C | -0.011461 | 0.00201738 | 0.409432 | 1.30E-08 | 454684 |
| Arm fat mass (left) | rs1454687 | 3 | 94038085 | G | C | -0.0197087 | 0.00196223 | 0.515341 | 9.80E-24 | 454684 |
| Arm fat mass (left) | rs1964675 | 3 | 136114945 | T | C | 0.0141739 | 0.00216787 | 0.71109 | 6.20E-11 | 454684 |
| Arm fat mass (left) | rs1911073 | 3 | 30051533 | G | A | 0.012604 | 0.00206581 | 0.346784 | 1.10E-09 | 454684 |
| Arm fat mass (left) | rs4682984 | 3 | 44591877 | C | T | 0.0165653 | 0.00278595 | 0.145686 | 2.70E-09 | 454684 |
| Arm fat mass (left) | rs9843653 | 3 | 49920571 | C | T | 0.0252503 | 0.00196363 | 0.511547 | 7.70E-38 | 454684 |
| Arm fat mass (left) | rs2312193 | 3 | 141188399 | C | T | 0.0191542 | 0.00201804 | 0.386836 | 2.30E-21 | 454684 |
| Arm fat mass (left) | rs1568488 | 3 | 153657951 | C | G | 0.0163381 | 0.00201498 | 0.594853 | 5.10E-16 | 454684 |
| Arm fat mass (left) | rs6790206 | 3 | 161434707 | G | A | 0.0115178 | 0.001962 | 0.541033 | 4.30E-09 | 454684 |
| Arm fat mass (left) | rs56172794 | 3 | 184001146 | T | C | -0.0125768 | 0.00196468 | 0.494547 | 1.50E-10 | 454684 |
| Arm fat mass (left) | rs2051559 | 4 | 3298800 | C | T | 0.0167491 | 0.00290189 | 0.132565 | 7.80E-09 | 454684 |
| Arm fat mass (left) | rs13107325 | 4 | 103188709 | T | C | 0.0408716 | 0.00373388 | 0.074861 | 6.90E-28 | 454684 |
| Arm fat mass (left) | rs148636479 | 4 | 164359678 | T | A | -0.0377859 | 0.00628573 | 0.028544 | 1.80E-09 | 454684 |
| Arm fat mass (left) | rs4524456 | 4 | 6492739 | A | G | -0.011019 | 0.00196494 | 0.52501 | 2.00E-08 | 454684 |
| Arm fat mass (left) | rs66679256 | 4 | 18351898 | T | C | 0.0178884 | 0.00197625 | 0.445787 | 1.40E-19 | 454684 |
| Arm fat mass (left) | rs73213484 | 4 | 28489339 | T | A | -0.0232558 | 0.00282018 | 0.141228 | 1.60E-16 | 454684 |
| Arm fat mass (left) | rs1383723 | 4 | 67803507 | T | A | -0.013744 | 0.00238823 | 0.783144 | 8.70E-09 | 454684 |
| Arm fat mass (left) | rs6847975 | 4 | 80812960 | A | G | 0.0138523 | 0.00205862 | 0.356166 | 1.70E-11 | 454684 |
| Arm fat mass (left) | rs3113509 | 4 | 52932825 | T | C | -0.0156029 | 0.00221797 | 0.731977 | 2.00E-12 | 454684 |
| Arm fat mass (left) | rs6840236 | 4 | 56289785 | C | T | 0.0121617 | 0.00197022 | 0.464876 | 6.70E-10 | 454684 |
| Arm fat mass (left) | rs1296328 | 4 | 137083193 | C | A | -0.0176713 | 0.00198731 | 0.55899 | 6.00E-19 | 454684 |
| Arm fat mass (left) | rs113079574 | 4 | 147354089 | T | C | -0.0157547 | 0.00250146 | 0.192745 | 3.00E-10 | 454684 |
| Arm fat mass (left) | rs55920177 | 4 | 171609715 | T | A | -0.0163018 | 0.00293712 | 0.128525 | 2.90E-08 | 454684 |
| Arm fat mass (left) | rs34811474 | 4 | 25408838 | A | G | -0.0203167 | 0.00232894 | 0.230832 | 2.70E-18 | 454684 |
| Arm fat mass (left) | rs12506689 | 4 | 145925105 | A | G | 0.0158438 | 0.00204019 | 0.366027 | 8.10E-15 | 454684 |
| Arm fat mass (left) | rs2242189 | 4 | 38691024 | C | T | -0.0121189 | 0.00203788 | 0.381123 | 2.70E-09 | 454684 |
| Arm fat mass (left) | rs10938398 | 4 | 45186139 | A | G | 0.0289053 | 0.00198504 | 0.433499 | 4.90E-48 | 454684 |
| Arm fat mass (left) | rs2237025 | 4 | 55541879 | C | T | -0.0127445 | 0.00199131 | 0.555398 | 1.60E-10 | 454684 |
| Arm fat mass (left) | rs1481012 | 4 | 89039082 | G | A | -0.0186237 | 0.00310914 | 0.11226 | 2.10E-09 | 454684 |
| Arm fat mass (left) | rs4419475 | 4 | 96150044 | T | A | 0.0120584 | 0.00199864 | 0.407323 | 1.60E-09 | 454684 |
| Arm fat mass (left) | rs1229984 | 4 | 100239319 | C | T | 0.0393534 | 0.00595845 | 0.972777 | 4.00E-11 | 454684 |
| Arm fat mass (left) | rs11099020 | 4 | 130724902 | T | C | -0.0147851 | 0.00204976 | 0.64052 | 5.50E-13 | 454684 |
| Arm fat mass (left) | rs35375873 | 5 | 43190647 | C | G | -0.0185551 | 0.00314482 | 0.112421 | 3.60E-09 | 454684 |
| Arm fat mass (left) | rs114263339 | 5 | 50932343 | T | C | 0.0405387 | 0.00620843 | 0.025704 | 6.60E-11 | 454684 |
| Arm fat mass (left) | rs1503526 | 5 | 63020706 | C | T | 0.0145474 | 0.00196527 | 0.479971 | 1.30E-13 | 454684 |
| Arm fat mass (left) | rs2610245 | 5 | 63978255 | G | A | -0.013826 | 0.00199845 | 0.517883 | 4.60E-12 | 454684 |
| Arm fat mass (left) | rs10515237 | 5 | 95751549 | G | A | 0.0145729 | 0.00218398 | 0.281864 | 2.50E-11 | 454684 |
| Arm fat mass (left) | rs40071 | 5 | 107496102 | C | T | -0.0207691 | 0.00256643 | 0.179496 | 5.80E-16 | 454684 |
| Arm fat mass (left) | rs8180470 | 5 | 119388744 | T | C | -0.0134171 | 0.00197718 | 0.534849 | 1.20E-11 | 454684 |
| Arm fat mass (left) | rs13156484 | 5 | 122653399 | A | G | -0.0149565 | 0.00198667 | 0.472151 | 5.10E-14 | 454684 |
| Arm fat mass (left) | rs329118 | 5 | 133861663 | T | C | -0.0147975 | 0.00199198 | 0.419408 | 1.10E-13 | 454684 |
| Arm fat mass (left) | rs2133561 | 5 | 139086651 | T | A | -0.0168395 | 0.00203572 | 0.611119 | 1.30E-16 | 454684 |
| Arm fat mass (left) | rs4958702 | 5 | 153544512 | C | T | -0.0147986 | 0.00198342 | 0.572324 | 8.60E-14 | 454684 |
| Arm fat mass (left) | rs9654453 | 5 | 299621 | C | T | 0.0163711 | 0.00293142 | 0.129275 | 2.30E-08 | 454684 |
| Arm fat mass (left) | rs10050620 | 5 | 63927239 | T | C | -0.0131861 | 0.00209814 | 0.325413 | 3.30E-10 | 454684 |
| Arm fat mass (left) | rs34483452 | 5 | 87986314 | A | C | 0.0329631 | 0.00288605 | 0.136309 | 3.30E-30 | 454684 |
| Arm fat mass (left) | rs9326879 | 5 | 112446323 | A | G | 0.0139209 | 0.00199304 | 0.421995 | 2.90E-12 | 454684 |
| Arm fat mass (left) | rs12515239 | 5 | 144692199 | T | C | -0.0121476 | 0.00222325 | 0.276334 | 4.70E-08 | 454684 |
| Arm fat mass (left) | rs2307111 | 5 | 75003678 | C | T | -0.02754 | 0.00200996 | 0.395088 | 9.90E-43 | 454684 |
| Arm fat mass (left) | rs12659431 | 5 | 103903766 | A | G | -0.012384 | 0.00196655 | 0.534761 | 3.00E-10 | 454684 |
| Arm fat mass (left) | rs62379271 | 5 | 105870033 | G | T | 0.0114284 | 0.00199356 | 0.578474 | 9.90E-09 | 454684 |
| Arm fat mass (left) | rs7730898 | 5 | 170459675 | A | G | 0.0184313 | 0.0022098 | 0.729116 | 7.40E-17 | 454684 |
| Arm fat mass (left) | rs698147 | 5 | 3513485 | G | A | -0.0118381 | 0.00197321 | 0.543521 | 2.00E-09 | 454684 |
| Arm fat mass (left) | rs252749 | 5 | 77389973 | A | G | -0.0173985 | 0.00227682 | 0.245973 | 2.10E-14 | 454684 |
| Arm fat mass (left) | rs7442885 | 5 | 87682877 | G | C | -0.021983 | 0.00239772 | 0.214122 | 4.80E-20 | 454684 |
| Arm fat mass (left) | rs2964023 | 5 | 153246412 | C | T | -0.0134683 | 0.00212947 | 0.692009 | 2.50E-10 | 454684 |
| Arm fat mass (left) | rs72892910 | 6 | 50816887 | T | G | 0.0368351 | 0.00260455 | 0.17221 | 2.10E-45 | 454684 |
| Arm fat mass (left) | rs13218383 | 6 | 120173501 | G | C | -0.0148205 | 0.00208009 | 0.33513 | 1.00E-12 | 454684 |
| Arm fat mass (left) | rs2499468 | 6 | 51809081 | A | C | 0.0147738 | 0.00206207 | 0.651004 | 7.80E-13 | 454684 |
| Arm fat mass (left) | rs9294260 | 6 | 83433228 | A | G | 0.0142301 | 0.00197622 | 0.476587 | 6.00E-13 | 454684 |
| Arm fat mass (left) | rs854917 | 6 | 90127390 | T | C | -0.0136979 | 0.00223729 | 0.735777 | 9.20E-10 | 454684 |
| Arm fat mass (left) | rs765874 | 6 | 143185557 | A | T | -0.0133534 | 0.00196381 | 0.489291 | 1.00E-11 | 454684 |
| Arm fat mass (left) | rs4377779 | 6 | 12117344 | C | T | -0.0151181 | 0.00206358 | 0.346836 | 2.40E-13 | 454684 |
| Arm fat mass (left) | rs11757278 | 6 | 13180454 | C | T | -0.0133584 | 0.00213574 | 0.3039 | 4.00E-10 | 454684 |
| Arm fat mass (left) | rs62396185 | 6 | 26180634 | C | G | -0.0278643 | 0.00224 | 0.260012 | 1.60E-35 | 454684 |
| Arm fat mass (left) | rs2744956 | 6 | 34618937 | C | T | 0.042561 | 0.00283351 | 0.139115 | 5.40E-51 | 454684 |
| Arm fat mass (left) | rs4714935 | 6 | 46411142 | A | T | 0.0112659 | 0.00198599 | 0.569184 | 1.40E-08 | 454684 |
| Arm fat mass (left) | rs7761673 | 6 | 70357368 | A | T | -0.0138763 | 0.00237534 | 0.219977 | 5.20E-09 | 454684 |
| Arm fat mass (left) | rs2253310 | 6 | 108888593 | G | C | 0.0192228 | 0.00202878 | 0.62616 | 2.70E-21 | 454684 |
| Arm fat mass (left) | rs10457469 | 6 | 126083658 | A | G | 0.0133873 | 0.0019657 | 0.523398 | 9.70E-12 | 454684 |
| Arm fat mass (left) | rs7755574 | 6 | 153364643 | T | G | 0.0142261 | 0.00218204 | 0.282684 | 7.00E-11 | 454684 |
| Arm fat mass (left) | rs62407565 | 6 | 33535739 | G | A | 0.0144529 | 0.00219473 | 0.275511 | 4.50E-11 | 454684 |
| Arm fat mass (left) | rs1031881 | 6 | 124921140 | G | T | 0.0157052 | 0.00261802 | 0.169261 | 2.00E-09 | 454684 |
| Arm fat mass (left) | rs36007635 | 6 | 163009335 | A | G | -0.0186142 | 0.0028509 | 0.137711 | 6.60E-11 | 454684 |
| Arm fat mass (left) | rs11242730 | 6 | 2030663 | T | G | 0.0130314 | 0.00230465 | 0.240305 | 1.60E-08 | 454684 |
| Arm fat mass (left) | rs28366156 | 6 | 31671498 | C | T | -0.0261533 | 0.00291226 | 0.130604 | 2.70E-19 | 454684 |
| Arm fat mass (left) | rs34045288 | 6 | 40369081 | T | C | 0.0217877 | 0.00208132 | 0.334417 | 1.20E-25 | 454684 |
| Arm fat mass (left) | rs7776021 | 6 | 73742152 | A | G | 0.0128467 | 0.00216959 | 0.287587 | 3.20E-09 | 454684 |
| Arm fat mass (left) | rs6938973 | 6 | 98421721 | C | T | 0.0175099 | 0.00200698 | 0.601545 | 2.70E-18 | 454684 |
| Arm fat mass (left) | rs9496567 | 6 | 100602753 | A | G | 0.0157022 | 0.00229209 | 0.243388 | 7.40E-12 | 454684 |
| Arm fat mass (left) | rs9375702 | 6 | 130384187 | T | C | -0.0150052 | 0.00212576 | 0.691221 | 1.70E-12 | 454684 |
| Arm fat mass (left) | rs9478496 | 6 | 154333183 | C | T | 0.0171777 | 0.00265915 | 0.164208 | 1.00E-10 | 454684 |
| Arm fat mass (left) | rs6973700 | 7 | 1856669 | G | A | -0.0158442 | 0.00243146 | 0.206163 | 7.20E-11 | 454684 |
| Arm fat mass (left) | rs1182199 | 7 | 2862542 | A | C | -0.0170742 | 0.00213665 | 0.30443 | 1.30E-15 | 454684 |
| Arm fat mass (left) | rs215634 | 7 | 32369148 | G | A | -0.0151933 | 0.00202366 | 0.611941 | 6.00E-14 | 454684 |
| Arm fat mass (left) | rs3901286 | 7 | 99107727 | A | C | -0.0192734 | 0.00273997 | 0.152431 | 2.00E-12 | 454684 |
| Arm fat mass (left) | rs3729793 | 7 | 6431457 | G | C | 0.0200026 | 0.00337532 | 0.093882 | 3.10E-09 | 454684 |
| Arm fat mass (left) | rs113852095 | 7 | 71614321 | T | C | -0.0168458 | 0.00257491 | 0.178773 | 6.10E-11 | 454684 |
| Arm fat mass (left) | rs10251591 | 7 | 95150088 | C | T | -0.0153904 | 0.0027805 | 0.146734 | 3.10E-08 | 454684 |
| Arm fat mass (left) | rs4725984 | 7 | 150668514 | C | T | 0.0150206 | 0.00206158 | 0.642043 | 3.20E-13 | 454684 |
| Arm fat mass (left) | rs213518 | 7 | 26941065 | C | T | 0.0180996 | 0.00278876 | 0.145594 | 8.60E-11 | 454684 |
| Arm fat mass (left) | rs2289379 | 7 | 44804225 | T | C | -0.0132558 | 0.00201781 | 0.395688 | 5.10E-11 | 454684 |
| Arm fat mass (left) | rs58862095 | 7 | 75081418 | T | C | -0.0193762 | 0.00199649 | 0.419266 | 2.90E-22 | 454684 |
| Arm fat mass (left) | rs17149254 | 7 | 76634463 | C | T | -0.0193646 | 0.00254348 | 0.804825 | 2.70E-14 | 454684 |
| Arm fat mass (left) | rs2192649 | 7 | 78126279 | G | T | 0.0117204 | 0.00197733 | 0.5008 | 3.10E-09 | 454684 |
| Arm fat mass (left) | rs4722398 | 7 | 3125220 | T | C | 0.0196573 | 0.00285933 | 0.136112 | 6.20E-12 | 454684 |
| Arm fat mass (left) | rs6954290 | 7 | 92283098 | T | G | 0.0124816 | 0.00210457 | 0.324298 | 3.00E-09 | 454684 |
| Arm fat mass (left) | rs16868443 | 7 | 93206264 | C | G | 0.0126557 | 0.00204724 | 0.360431 | 6.30E-10 | 454684 |
| Arm fat mass (left) | rs2396625 | 7 | 113028634 | A | T | -0.0195501 | 0.00200169 | 0.421325 | 1.60E-22 | 454684 |
| Arm fat mass (left) | rs3807566 | 7 | 50564204 | T | G | -0.0127009 | 0.00198431 | 0.438358 | 1.50E-10 | 454684 |
| Arm fat mass (left) | rs4718964 | 7 | 70038969 | T | G | 0.0131517 | 0.00200215 | 0.413107 | 5.10E-11 | 454684 |
| Arm fat mass (left) | rs10248298 | 7 | 121963813 | A | C | 0.0154945 | 0.00203786 | 0.365927 | 2.90E-14 | 454684 |
| Arm fat mass (left) | rs11525873 | 7 | 138817193 | C | T | -0.0191106 | 0.00331707 | 0.097694 | 8.30E-09 | 454684 |
| Arm fat mass (left) | rs4737188 | 8 | 64756657 | T | A | -0.0129751 | 0.00197092 | 0.473838 | 4.60E-11 | 454684 |
| Arm fat mass (left) | rs10100245 | 8 | 77226919 | A | G | 0.0209957 | 0.00198447 | 0.564461 | 3.70E-26 | 454684 |
| Arm fat mass (left) | rs13252030 | 8 | 112491883 | G | A | 0.0132142 | 0.00222785 | 0.73261 | 3.00E-09 | 454684 |
| Arm fat mass (left) | rs11778934 | 8 | 116551405 | G | C | -0.0127774 | 0.00197749 | 0.536216 | 1.00E-10 | 454684 |
| Arm fat mass (left) | rs4876611 | 8 | 116671848 | G | A | 0.0224511 | 0.00219146 | 0.7202 | 1.20E-24 | 454684 |
| Arm fat mass (left) | rs6601451 | 8 | 10243681 | G | C | -0.0161178 | 0.00196923 | 0.515513 | 2.70E-16 | 454684 |
| Arm fat mass (left) | rs11779446 | 8 | 23388326 | G | A | -0.0196384 | 0.00268178 | 0.161296 | 2.40E-13 | 454684 |
| Arm fat mass (left) | rs13268355 | 8 | 43102563 | T | G | -0.0233473 | 0.00406197 | 0.06246 | 9.00E-09 | 454684 |
| Arm fat mass (left) | rs7828631 | 8 | 132875320 | T | C | 0.0175017 | 0.00314774 | 0.109939 | 2.70E-08 | 454684 |
| Arm fat mass (left) | rs13248187 | 8 | 14336834 | C | T | 0.0145751 | 0.00222858 | 0.268477 | 6.10E-11 | 454684 |
| Arm fat mass (left) | rs2980237 | 8 | 76315205 | T | G | 0.0130989 | 0.00227939 | 0.751217 | 9.10E-09 | 454684 |
| Arm fat mass (left) | rs12541408 | 8 | 95585807 | C | T | -0.0115525 | 0.00211436 | 0.317466 | 4.70E-08 | 454684 |
| Arm fat mass (left) | rs117176448 | 8 | 27261138 | G | C | 0.0223563 | 0.00333113 | 0.096162 | 1.90E-11 | 454684 |
| Arm fat mass (left) | rs1808629 | 8 | 73435964 | A | G | -0.0207143 | 0.00212534 | 0.685436 | 1.90E-22 | 454684 |
| Arm fat mass (left) | rs2920939 | 8 | 93182601 | A | G | 0.0116229 | 0.002011 | 0.606699 | 7.50E-09 | 454684 |
| Arm fat mass (left) | rs2954021 | 8 | 126482077 | G | A | 0.0152442 | 0.00196576 | 0.50459 | 8.80E-15 | 454684 |
| Arm fat mass (left) | rs11782074 | 8 | 142617096 | T | G | 0.014404 | 0.00205439 | 0.383625 | 2.40E-12 | 454684 |
| Arm fat mass (left) | rs34571768 | 8 | 57112046 | A | G | -0.0165531 | 0.00299047 | 0.126427 | 3.10E-08 | 454684 |
| Arm fat mass (left) | rs10099330 | 8 | 143383694 | G | A | 0.0128792 | 0.00197713 | 0.452935 | 7.30E-11 | 454684 |
| Arm fat mass (left) | rs7460093 | 8 | 144876159 | A | G | 0.0108512 | 0.00198676 | 0.531134 | 4.70E-08 | 454684 |
| Arm fat mass (left) | rs7357754 | 9 | 92207308 | G | A | 0.0134753 | 0.00197193 | 0.50012 | 8.30E-12 | 454684 |
| Arm fat mass (left) | rs9650755 | 9 | 96484342 | G | A | 0.0122604 | 0.00223426 | 0.26445 | 4.10E-08 | 454684 |
| Arm fat mass (left) | rs7038943 | 9 | 120377178 | C | T | -0.0140345 | 0.00207403 | 0.338812 | 1.30E-11 | 454684 |
| Arm fat mass (left) | rs3739514 | 9 | 133783025 | A | G | 0.0128072 | 0.00208299 | 0.339651 | 7.80E-10 | 454684 |
| Arm fat mass (left) | rs10756714 | 9 | 15885041 | G | A | -0.0220288 | 0.00198264 | 0.444268 | 1.10E-28 | 454684 |
| Arm fat mass (left) | rs1928706 | 9 | 27784764 | A | G | -0.0114906 | 0.0019769 | 0.471078 | 6.20E-09 | 454684 |
| Arm fat mass (left) | rs7034554 | 9 | 37081301 | G | A | -0.0128839 | 0.00203031 | 0.373708 | 2.20E-10 | 454684 |
| Arm fat mass (left) | rs1634350 | 9 | 81334684 | A | C | 0.0111794 | 0.0020045 | 0.42033 | 2.40E-08 | 454684 |
| Arm fat mass (left) | rs1415476 | 9 | 16587648 | T | C | 0.0234528 | 0.0039968 | 0.934954 | 4.40E-09 | 454684 |
| Arm fat mass (left) | rs10756792 | 9 | 16726119 | T | C | -0.0166304 | 0.00225955 | 0.74307 | 1.80E-13 | 454684 |
| Arm fat mass (left) | rs12001437 | 9 | 34074476 | C | T | 0.012097 | 0.0020385 | 0.367762 | 3.00E-09 | 454684 |
| Arm fat mass (left) | rs7027304 | 9 | 129408290 | T | C | 0.014504 | 0.00207453 | 0.65264 | 2.70E-12 | 454684 |
| Arm fat mass (left) | rs10811873 | 9 | 23206311 | C | A | -0.0124965 | 0.00204436 | 0.37596 | 9.80E-10 | 454684 |
| Arm fat mass (left) | rs17770336 | 9 | 28414625 | T | C | 0.0228379 | 0.00209896 | 0.32244 | 1.40E-27 | 454684 |
| Arm fat mass (left) | rs28696937 | 9 | 122649882 | T | C | 0.0182424 | 0.00324922 | 0.102753 | 2.00E-08 | 454684 |
| Arm fat mass (left) | rs17218879 | 9 | 14768540 | G | C | 0.0122123 | 0.00208621 | 0.33858 | 4.80E-09 | 454684 |
| Arm fat mass (left) | rs10116162 | 9 | 94188856 | C | T | -0.0142936 | 0.00220077 | 0.281816 | 8.30E-11 | 454684 |
| Arm fat mass (left) | rs6479008 | 9 | 103073591 | A | C | 0.0172079 | 0.00211138 | 0.315902 | 3.60E-16 | 454684 |
| Arm fat mass (left) | rs28670671 | 9 | 140363045 | C | T | -0.0123229 | 0.00225116 | 0.286019 | 4.40E-08 | 454684 |
| Arm fat mass (left) | rs7893571 | 10 | 16750129 | T | G | 0.0137924 | 0.00208926 | 0.665931 | 4.10E-11 | 454684 |
| Arm fat mass (left) | rs7070670 | 10 | 61842645 | T | C | -0.0123871 | 0.00210687 | 0.327979 | 4.10E-09 | 454684 |
| Arm fat mass (left) | rs6480794 | 10 | 77657971 | A | C | 0.0113464 | 0.00197266 | 0.511217 | 8.80E-09 | 454684 |
| Arm fat mass (left) | rs12245654 | 10 | 87562928 | C | A | 0.0241765 | 0.00381391 | 0.072572 | 2.30E-10 | 454684 |
| Arm fat mass (left) | rs12762034 | 10 | 33969931 | C | T | 0.0237818 | 0.00368828 | 0.076959 | 1.10E-10 | 454684 |
| Arm fat mass (left) | rs946185 | 10 | 76423739 | G | A | -0.0131429 | 0.00201522 | 0.594808 | 6.90E-11 | 454684 |
| Arm fat mass (left) | rs10887578 | 10 | 88096047 | C | G | 0.0129406 | 0.00197762 | 0.497524 | 6.00E-11 | 454684 |
| Arm fat mass (left) | rs577525 | 10 | 99769388 | C | T | 0.0190934 | 0.00198156 | 0.56205 | 5.70E-22 | 454684 |
| Arm fat mass (left) | rs4919478 | 10 | 102427797 | G | A | 0.0121678 | 0.00214112 | 0.310974 | 1.30E-08 | 454684 |
| Arm fat mass (left) | rs67609008 | 10 | 126640936 | C | T | 0.0162653 | 0.00218937 | 0.283588 | 1.10E-13 | 454684 |
| Arm fat mass (left) | rs7916385 | 10 | 102470432 | T | C | -0.0237025 | 0.00299162 | 0.150244 | 2.30E-15 | 454684 |
| Arm fat mass (left) | rs11017772 | 10 | 132954247 | T | C | -0.0149668 | 0.00243704 | 0.205911 | 8.20E-10 | 454684 |
| Arm fat mass (left) | rs11012732 | 10 | 21830104 | G | A | 0.0193761 | 0.00208882 | 0.331708 | 1.80E-20 | 454684 |
| Arm fat mass (left) | rs12259464 | 10 | 53680099 | A | G | 0.0114617 | 0.00197549 | 0.484583 | 6.60E-09 | 454684 |
| Arm fat mass (left) | rs10510025 | 10 | 118650996 | T | C | 0.0172905 | 0.00228538 | 0.247076 | 3.90E-14 | 454684 |
| Arm fat mass (left) | rs79780963 | 10 | 104952499 | T | C | 0.0235971 | 0.00367487 | 0.077393 | 1.40E-10 | 454684 |
| Arm fat mass (left) | rs2172131 | 10 | 133978962 | C | T | -0.014698 | 0.00199232 | 0.578573 | 1.60E-13 | 454684 |
| Arm fat mass (left) | rs4929923 | 11 | 8639200 | C | T | 0.0181675 | 0.00205225 | 0.645207 | 8.60E-19 | 454684 |
| Arm fat mass (left) | rs11030016 | 11 | 27487992 | T | C | 0.0174327 | 0.00224469 | 0.739775 | 8.10E-15 | 454684 |
| Arm fat mass (left) | rs12286929 | 11 | 115022404 | G | A | 0.0117721 | 0.00197121 | 0.526957 | 2.30E-09 | 454684 |
| Arm fat mass (left) | rs329651 | 11 | 133767622 | T | G | 0.0137068 | 0.00248816 | 0.804101 | 3.60E-08 | 454684 |
| Arm fat mass (left) | rs6597975 | 11 | 838842 | G | C | 0.0125141 | 0.00198334 | 0.543878 | 2.80E-10 | 454684 |
| Arm fat mass (left) | rs7124681 | 11 | 47529947 | A | C | 0.0252988 | 0.00199463 | 0.408402 | 7.30E-37 | 454684 |
| Arm fat mass (left) | rs61903695 | 11 | 89922417 | G | A | 0.014529 | 0.00225812 | 0.254903 | 1.20E-10 | 454684 |
| Arm fat mass (left) | rs1782508 | 11 | 30243795 | G | C | -0.0150114 | 0.00206525 | 0.655507 | 3.60E-13 | 454684 |
| Arm fat mass (left) | rs59227842 | 11 | 43692423 | G | A | 0.0236279 | 0.00214037 | 0.311468 | 2.50E-28 | 454684 |
| Arm fat mass (left) | rs2846139 | 11 | 65309983 | T | C | 0.0159784 | 0.00238753 | 0.217363 | 2.20E-11 | 454684 |
| Arm fat mass (left) | rs4936175 | 11 | 132641959 | C | T | 0.011902 | 0.00197767 | 0.442747 | 1.80E-09 | 454684 |
| Arm fat mass (left) | rs4757144 | 11 | 13331226 | A | G | 0.0156076 | 0.00199897 | 0.590103 | 5.80E-15 | 454684 |
| Arm fat mass (left) | rs1013402 | 11 | 27712381 | G | A | 0.0303261 | 0.00210679 | 0.318444 | 5.60E-47 | 454684 |
| Arm fat mass (left) | rs286535 | 11 | 85215938 | C | G | 0.0176596 | 0.00287235 | 0.864657 | 7.80E-10 | 454684 |
| Arm fat mass (left) | rs719802 | 11 | 113234679 | C | T | -0.0132497 | 0.00201729 | 0.614397 | 5.10E-11 | 454684 |
| Arm fat mass (left) | rs1916039 | 11 | 122750426 | G | A | 0.014508 | 0.00227305 | 0.25268 | 1.70E-10 | 454684 |
| Arm fat mass (left) | rs7944782 | 11 | 130795698 | G | T | 0.0161927 | 0.00197545 | 0.509791 | 2.50E-16 | 454684 |
| Arm fat mass (left) | rs55707359 | 11 | 46159333 | G | T | 0.0481488 | 0.00807265 | 0.015445 | 2.50E-09 | 454684 |
| Arm fat mass (left) | rs801738 | 11 | 65924217 | G | C | -0.0164586 | 0.00205054 | 0.357519 | 1.00E-15 | 454684 |
| Arm fat mass (left) | rs111258054 | 11 | 134611390 | T | C | 0.0180733 | 0.00257282 | 0.18362 | 2.10E-12 | 454684 |
| Arm fat mass (left) | rs55726687 | 12 | 991306 | A | G | 0.0235723 | 0.00241156 | 0.209743 | 1.40E-22 | 454684 |
| Arm fat mass (left) | rs10771041 | 12 | 24058135 | T | C | 0.0189728 | 0.00307101 | 0.116025 | 6.50E-10 | 454684 |
| Arm fat mass (left) | rs3730071 | 12 | 49168798 | A | C | -0.0353706 | 0.00574087 | 0.030236 | 7.20E-10 | 454684 |
| Arm fat mass (left) | rs111260184 | 12 | 107713696 | A | G | 0.0109714 | 0.00198152 | 0.503056 | 3.10E-08 | 454684 |
| Arm fat mass (left) | rs10745787 | 12 | 97592311 | A | G | -0.0130206 | 0.00208545 | 0.668308 | 4.30E-10 | 454684 |
| Arm fat mass (left) | rs3892367 | 12 | 122609582 | A | G | 0.0152882 | 0.00196575 | 0.477967 | 7.40E-15 | 454684 |
| Arm fat mass (left) | rs76895963 | 12 | 4384844 | G | T | 0.060354 | 0.00761823 | 0.020662 | 2.30E-15 | 454684 |
| Arm fat mass (left) | rs61754230 | 12 | 72179446 | T | C | 0.0419817 | 0.0070674 | 0.019706 | 2.80E-09 | 454684 |
| Arm fat mass (left) | rs11105842 | 12 | 91243910 | A | G | -0.0133978 | 0.0020483 | 0.367525 | 6.10E-11 | 454684 |
| Arm fat mass (left) | rs11111540 | 12 | 103761501 | A | G | -0.0141541 | 0.00209462 | 0.330222 | 1.40E-11 | 454684 |
| Arm fat mass (left) | rs11609659 | 12 | 108296260 | C | T | -0.0169368 | 0.00230567 | 0.244104 | 2.00E-13 | 454684 |
| Arm fat mass (left) | rs61942560 | 12 | 110737836 | T | C | 0.0163371 | 0.00233346 | 0.230642 | 2.50E-12 | 454684 |
| Arm fat mass (left) | rs145350287 | 12 | 120907309 | A | T | -0.0419001 | 0.00503429 | 0.039613 | 8.60E-17 | 454684 |
| Arm fat mass (left) | rs10744146 | 12 | 17212881 | A | G | -0.0110283 | 0.0019698 | 0.513924 | 2.20E-08 | 454684 |
| Arm fat mass (left) | rs3759094 | 12 | 56497903 | T | C | -0.0145116 | 0.00208131 | 0.337204 | 3.10E-12 | 454684 |
| Arm fat mass (left) | rs770082 | 12 | 89776485 | A | G | 0.0171723 | 0.00198997 | 0.436972 | 6.20E-18 | 454684 |
| Arm fat mass (left) | rs1458156 | 12 | 41887940 | T | C | 0.0135875 | 0.00196759 | 0.488487 | 5.00E-12 | 454684 |
| Arm fat mass (left) | rs7132908 | 12 | 50263148 | A | G | 0.0294779 | 0.00202161 | 0.38445 | 3.70E-48 | 454684 |
| Arm fat mass (left) | rs10878349 | 12 | 66327632 | G | A | -0.0131637 | 0.00197056 | 0.513105 | 2.40E-11 | 454684 |
| Arm fat mass (left) | rs10998 | 12 | 122989412 | A | G | 0.0260284 | 0.00226183 | 0.746782 | 1.20E-30 | 454684 |
| Arm fat mass (left) | rs1686726 | 12 | 124551229 | C | A | -0.0122265 | 0.00200232 | 0.595129 | 1.00E-09 | 454684 |
| Arm fat mass (left) | rs77927866 | 12 | 133487774 | A | G | 0.0122974 | 0.00213358 | 0.311775 | 8.20E-09 | 454684 |
| Arm fat mass (left) | rs1967772 | 13 | 28036062 | A | G | -0.0171483 | 0.00219073 | 0.285212 | 5.00E-15 | 454684 |
| Arm fat mass (left) | rs1441264 | 13 | 79580919 | A | G | 0.0176567 | 0.00204624 | 0.593689 | 6.20E-18 | 454684 |
| Arm fat mass (left) | rs11842871 | 13 | 31042452 | T | G | -0.0127605 | 0.00224698 | 0.259868 | 1.40E-08 | 454684 |
| Arm fat mass (left) | rs9571687 | 13 | 67472713 | A | C | -0.0122161 | 0.00209704 | 0.329444 | 5.70E-09 | 454684 |
| Arm fat mass (left) | rs7996639 | 13 | 97019090 | A | G | 0.0132619 | 0.00199111 | 0.44922 | 2.70E-11 | 454684 |
| Arm fat mass (left) | rs9522183 | 13 | 111977280 | T | G | -0.014843 | 0.00199588 | 0.561751 | 1.00E-13 | 454684 |
| Arm fat mass (left) | rs1336486 | 13 | 40784814 | G | T | 0.0152359 | 0.00209769 | 0.328634 | 3.80E-13 | 454684 |
| Arm fat mass (left) | rs9532583 | 13 | 41256473 | G | T | -0.0131396 | 0.00217142 | 0.288425 | 1.40E-09 | 454684 |
| Arm fat mass (left) | rs9568867 | 13 | 54107352 | A | G | 0.0308928 | 0.00295655 | 0.129178 | 1.50E-25 | 454684 |
| Arm fat mass (left) | rs9888533 | 13 | 107854612 | T | C | 0.0112626 | 0.00200667 | 0.538114 | 2.00E-08 | 454684 |
| Arm fat mass (left) | rs4055791 | 13 | 59266053 | T | C | -0.0157677 | 0.0019966 | 0.41676 | 2.90E-15 | 454684 |
| Arm fat mass (left) | rs12427676 | 13 | 33382028 | G | A | -0.011909 | 0.00197829 | 0.479126 | 1.70E-09 | 454684 |
| Arm fat mass (left) | rs2146641 | 13 | 53493728 | T | C | -0.0173476 | 0.00306308 | 0.882535 | 1.50E-08 | 454684 |
| Arm fat mass (left) | rs2585526 | 13 | 78624080 | G | A | 0.0112886 | 0.00198365 | 0.557427 | 1.30E-08 | 454684 |
| Arm fat mass (left) | rs56858768 | 13 | 86511730 | A | G | 0.0148577 | 0.00216095 | 0.296906 | 6.20E-12 | 454684 |
| Arm fat mass (left) | rs7331420 | 13 | 99236471 | A | G | -0.0140267 | 0.00218808 | 0.285189 | 1.50E-10 | 454684 |
| Arm fat mass (left) | rs9515455 | 13 | 112239671 | A | G | 0.0130972 | 0.00200816 | 0.414836 | 6.90E-11 | 454684 |
| Arm fat mass (left) | rs3803286 | 14 | 103246470 | G | A | -0.0165993 | 0.00208594 | 0.666746 | 1.80E-15 | 454684 |
| Arm fat mass (left) | rs12883788 | 14 | 33303540 | T | C | 0.0175813 | 0.00198104 | 0.459754 | 7.00E-19 | 454684 |
| Arm fat mass (left) | rs12885458 | 14 | 47303114 | G | T | -0.0144848 | 0.00197022 | 0.507987 | 2.00E-13 | 454684 |
| Arm fat mass (left) | rs4430672 | 14 | 63094407 | C | T | -0.0143182 | 0.00246799 | 0.800931 | 6.60E-09 | 454684 |
| Arm fat mass (left) | rs1286058 | 14 | 91458523 | A | T | 0.0120838 | 0.00215638 | 0.70374 | 2.10E-08 | 454684 |
| Arm fat mass (left) | rs12881629 | 14 | 101146413 | G | A | 0.0219167 | 0.00356835 | 0.082641 | 8.20E-10 | 454684 |
| Arm fat mass (left) | rs217672 | 14 | 62361021 | C | A | 0.0166511 | 0.0022169 | 0.271729 | 5.90E-14 | 454684 |
| Arm fat mass (left) | rs6575340 | 14 | 94023972 | A | G | 0.0189583 | 0.00204961 | 0.636018 | 2.30E-20 | 454684 |
| Arm fat mass (left) | rs61992671 | 14 | 101531854 | G | A | -0.0149975 | 0.00205708 | 0.492049 | 3.10E-13 | 454684 |
| Arm fat mass (left) | rs2103785 | 14 | 23804719 | T | C | -0.0132447 | 0.00226225 | 0.255973 | 4.80E-09 | 454684 |
| Arm fat mass (left) | rs9788550 | 14 | 29681138 | C | G | -0.0217551 | 0.00228824 | 0.247493 | 2.00E-21 | 454684 |
| Arm fat mass (left) | rs10146997 | 14 | 79945162 | G | A | 0.0265575 | 0.0023673 | 0.221861 | 3.30E-29 | 454684 |
| Arm fat mass (left) | rs61983990 | 14 | 41475003 | A | G | 0.0219218 | 0.00359046 | 0.082493 | 1.00E-09 | 454684 |
| Arm fat mass (left) | rs12437334 | 14 | 69754922 | C | T | 0.011732 | 0.00205886 | 0.362643 | 1.20E-08 | 454684 |
| Arm fat mass (left) | rs1470705 | 14 | 88366104 | C | T | -0.0131819 | 0.00226906 | 0.746468 | 6.30E-09 | 454684 |
| Arm fat mass (left) | rs10132514 | 14 | 104012189 | T | C | -0.0143312 | 0.00222318 | 0.273273 | 1.10E-10 | 454684 |
| Arm fat mass (left) | rs28457680 | 15 | 58885035 | A | T | 0.0179152 | 0.0028809 | 0.136568 | 5.00E-10 | 454684 |
| Arm fat mass (left) | rs4842920 | 15 | 84539424 | T | G | -0.0137612 | 0.00219702 | 0.280031 | 3.80E-10 | 454684 |
| Arm fat mass (left) | rs12594218 | 15 | 62261741 | T | C | -0.0400218 | 0.00670498 | 0.02206 | 2.40E-09 | 454684 |
| Arm fat mass (left) | rs7171864 | 15 | 73227249 | A | G | 0.0165074 | 0.00208707 | 0.660092 | 2.60E-15 | 454684 |
| Arm fat mass (left) | rs72757416 | 15 | 92574321 | C | A | -0.0153576 | 0.00241949 | 0.217703 | 2.20E-10 | 454684 |
| Arm fat mass (left) | rs4284600 | 15 | 31843528 | C | T | 0.0112289 | 0.00198297 | 0.467106 | 1.50E-08 | 454684 |
| Arm fat mass (left) | rs2120450 | 15 | 53101580 | A | T | 0.0175376 | 0.00281376 | 0.144781 | 4.60E-10 | 454684 |
| Arm fat mass (left) | rs8026927 | 15 | 27001117 | A | C | -0.0114177 | 0.00206241 | 0.364832 | 3.10E-08 | 454684 |
| Arm fat mass (left) | rs9944241 | 15 | 51898058 | C | T | -0.0148498 | 0.00205115 | 0.484331 | 4.50E-13 | 454684 |
| Arm fat mass (left) | rs3784710 | 15 | 68072458 | C | T | -0.0281088 | 0.00234631 | 0.226637 | 4.50E-33 | 454684 |
| Arm fat mass (left) | rs34769775 | 15 | 80989172 | T | C | -0.0155767 | 0.00215364 | 0.297426 | 4.70E-13 | 454684 |
| Arm fat mass (left) | rs72767957 | 15 | 99240793 | G | A | -0.016358 | 0.00246186 | 0.200138 | 3.00E-11 | 454684 |
| Arm fat mass (left) | rs1871360 | 15 | 95276540 | A | T | -0.0121415 | 0.00206461 | 0.366647 | 4.10E-09 | 454684 |
| Arm fat mass (left) | rs7201895 | 16 | 407723 | A | G | -0.0150582 | 0.00206783 | 0.354223 | 3.30E-13 | 454684 |
| Arm fat mass (left) | rs35154326 | 16 | 24862414 | G | A | -0.015878 | 0.00222119 | 0.274045 | 8.80E-13 | 454684 |
| Arm fat mass (left) | rs56094641 | 16 | 53806453 | G | A | 0.0662673 | 0.00200224 | 0.404655 | 1.00E-200 | 454684 |
| Arm fat mass (left) | rs2917677 | 16 | 69750849 | T | C | -0.0202884 | 0.00200052 | 0.410717 | 3.60E-24 | 454684 |
| Arm fat mass (left) | rs879620 | 16 | 4015729 | T | C | 0.0242946 | 0.00202412 | 0.613275 | 3.40E-33 | 454684 |
| Arm fat mass (left) | rs9926784 | 16 | 19941968 | C | T | -0.0191005 | 0.00253221 | 0.184498 | 4.60E-14 | 454684 |
| Arm fat mass (left) | rs7498665 | 16 | 28883241 | G | A | 0.0310996 | 0.0020083 | 0.399535 | 4.30E-54 | 454684 |
| Arm fat mass (left) | rs756717 | 16 | 72996162 | A | G | -0.0145077 | 0.00203158 | 0.399005 | 9.30E-13 | 454684 |
| Arm fat mass (left) | rs4783156 | 16 | 85320577 | C | T | -0.0132722 | 0.0024281 | 0.790257 | 4.60E-08 | 454684 |
| Arm fat mass (left) | rs889495 | 16 | 2233565 | C | T | -0.0121623 | 0.00201904 | 0.582686 | 1.70E-09 | 454684 |
| Arm fat mass (left) | rs3814883 | 16 | 29994922 | T | C | 0.0247342 | 0.00197266 | 0.482225 | 4.60E-36 | 454684 |
| Arm fat mass (left) | rs35949039 | 16 | 70572605 | T | G | -0.0197405 | 0.00322328 | 0.105574 | 9.10E-10 | 454684 |
| Arm fat mass (left) | rs2075466 | 16 | 4872970 | C | G | 0.0141174 | 0.00222308 | 0.267172 | 2.10E-10 | 454684 |
| Arm fat mass (left) | rs9673839 | 16 | 76895693 | G | A | 0.0115147 | 0.00197643 | 0.49098 | 5.70E-09 | 454684 |
| Arm fat mass (left) | rs11150461 | 16 | 82448195 | G | C | -0.0147282 | 0.00221597 | 0.727439 | 3.00E-11 | 454684 |
| Arm fat mass (left) | rs3743861 | 16 | 89818340 | C | G | -0.0108791 | 0.00199388 | 0.415269 | 4.90E-08 | 454684 |
| Arm fat mass (left) | rs1017529 | 17 | 27912415 | A | C | 0.0173693 | 0.00263776 | 0.174808 | 4.60E-11 | 454684 |
| Arm fat mass (left) | rs59237168 | 17 | 31479035 | C | T | -0.0158859 | 0.00239503 | 0.215635 | 3.30E-11 | 454684 |
| Arm fat mass (left) | rs9916444 | 17 | 42313512 | G | C | 0.0135153 | 0.00207752 | 0.341687 | 7.70E-11 | 454684 |
| Arm fat mass (left) | rs7218014 | 17 | 65832016 | C | T | 0.0233685 | 0.00247717 | 0.197303 | 4.00E-21 | 454684 |
| Arm fat mass (left) | rs35867081 | 17 | 79047278 | G | A | -0.0150029 | 0.00197828 | 0.512194 | 3.40E-14 | 454684 |
| Arm fat mass (left) | rs4790841 | 17 | 1835482 | T | C | -0.0264582 | 0.00273361 | 0.154515 | 3.70E-22 | 454684 |
| Arm fat mass (left) | rs4792716 | 17 | 15943144 | G | A | 0.0130181 | 0.00198484 | 0.562186 | 5.40E-11 | 454684 |
| Arm fat mass (left) | rs2306593 | 17 | 34866546 | T | C | -0.0150966 | 0.00197266 | 0.488166 | 2.00E-14 | 454684 |
| Arm fat mass (left) | rs113866544 | 17 | 46270606 | C | T | 0.0348657 | 0.0039049 | 0.068313 | 4.30E-19 | 454684 |
| Arm fat mass (left) | rs17744603 | 17 | 52926401 | G | C | 0.0154855 | 0.00264276 | 0.16877 | 4.60E-09 | 454684 |
| Arm fat mass (left) | rs11150745 | 17 | 78757626 | G | A | -0.0199397 | 0.00211684 | 0.317694 | 4.50E-21 | 454684 |
| Arm fat mass (left) | rs3826408 | 17 | 7101292 | T | C | 0.0128671 | 0.00197392 | 0.456869 | 7.10E-11 | 454684 |
| Arm fat mass (left) | rs35513882 | 17 | 47077682 | C | G | 0.0162854 | 0.00274112 | 0.153142 | 2.80E-09 | 454684 |
| Arm fat mass (left) | rs9906072 | 17 | 21245687 | C | T | -0.0125015 | 0.00210527 | 0.514166 | 2.90E-09 | 454684 |
| Arm fat mass (left) | rs35537311 | 17 | 71126150 | T | C | -0.0120756 | 0.00202228 | 0.388518 | 2.40E-09 | 454684 |
| Arm fat mass (left) | rs59499656 | 18 | 40768309 | T | A | -0.0176829 | 0.00207822 | 0.343222 | 1.80E-17 | 454684 |
| Arm fat mass (left) | rs9955276 | 18 | 1839339 | T | C | 0.0199204 | 0.00281276 | 0.144437 | 1.40E-12 | 454684 |
| Arm fat mass (left) | rs8093356 | 18 | 2664532 | T | C | -0.0150571 | 0.0023528 | 0.226985 | 1.60E-10 | 454684 |
| Arm fat mass (left) | rs4800191 | 18 | 22461398 | C | G | 0.0113661 | 0.0020624 | 0.641812 | 3.60E-08 | 454684 |
| Arm fat mass (left) | rs8096564 | 18 | 39910592 | T | G | 0.0140977 | 0.00216313 | 0.298118 | 7.20E-11 | 454684 |
| Arm fat mass (left) | rs1652376 | 18 | 21109466 | T | G | -0.0226587 | 0.00197419 | 0.462411 | 1.70E-30 | 454684 |
| Arm fat mass (left) | rs11664848 | 18 | 42575661 | G | C | 0.01389 | 0.00208492 | 0.659624 | 2.70E-11 | 454684 |
| Arm fat mass (left) | rs9951619 | 18 | 56882326 | G | T | 0.0154246 | 0.00234365 | 0.767286 | 4.70E-11 | 454684 |
| Arm fat mass (left) | rs6567160 | 18 | 57829135 | C | T | 0.0523734 | 0.00232825 | 0.232655 | 4.70E-112 | 454684 |
| Arm fat mass (left) | rs57636386 | 18 | 58048295 | C | T | -0.0403384 | 0.00356128 | 0.083836 | 9.70E-30 | 454684 |
| Arm fat mass (left) | rs7228316 | 18 | 63428272 | A | C | 0.014775 | 0.00219846 | 0.27789 | 1.80E-11 | 454684 |
| Arm fat mass (left) | rs2074881 | 19 | 1970021 | T | C | -0.0153506 | 0.00263986 | 0.168513 | 6.10E-09 | 454684 |
| Arm fat mass (left) | rs273505 | 19 | 18217147 | C | T | 0.0181482 | 0.00199382 | 0.422063 | 8.80E-20 | 454684 |
| Arm fat mass (left) | rs585066 | 19 | 34317166 | T | C | 0.0119348 | 0.00197524 | 0.466954 | 1.50E-09 | 454684 |
| Arm fat mass (left) | rs10423928 | 19 | 46182304 | A | T | -0.0308295 | 0.00248335 | 0.194424 | 2.20E-35 | 454684 |
| Arm fat mass (left) | rs12974458 | 19 | 1866115 | T | C | 0.0134957 | 0.00198523 | 0.54326 | 1.10E-11 | 454684 |
| Arm fat mass (left) | rs113230003 | 19 | 18460956 | A | G | -0.0187696 | 0.0022608 | 0.260535 | 1.00E-16 | 454684 |
| Arm fat mass (left) | rs12462975 | 19 | 30272202 | A | G | 0.0207656 | 0.00210811 | 0.329615 | 6.80E-23 | 454684 |
| Arm fat mass (left) | rs7259070 | 19 | 47562509 | C | T | 0.0184885 | 0.00202443 | 0.596191 | 6.70E-20 | 454684 |
| Arm fat mass (left) | rs72976986 | 19 | 4050424 | A | G | -0.0185261 | 0.00253165 | 0.19021 | 2.50E-13 | 454684 |
| Arm fat mass (left) | rs429358 | 19 | 45411941 | C | T | -0.0249711 | 0.00272836 | 0.154037 | 5.60E-20 | 454684 |
| Arm fat mass (left) | rs10404726 | 19 | 18834514 | T | C | -0.0191879 | 0.00197609 | 0.465533 | 2.70E-22 | 454684 |
| Arm fat mass (left) | rs7250833 | 19 | 33937277 | T | C | 0.0170378 | 0.0021751 | 0.288872 | 4.80E-15 | 454684 |
| Arm fat mass (left) | rs56374036 | 20 | 46367372 | G | A | -0.0146977 | 0.00242291 | 0.212662 | 1.30E-09 | 454684 |
| Arm fat mass (left) | rs6034530 | 20 | 16541089 | C | T | 0.0132566 | 0.00230247 | 0.756562 | 8.50E-09 | 454684 |
| Arm fat mass (left) | rs6058209 | 20 | 33821577 | A | G | 0.014122 | 0.00210882 | 0.322029 | 2.10E-11 | 454684 |
| Arm fat mass (left) | rs1056441 | 20 | 62370349 | C | T | 0.0126423 | 0.00210312 | 0.675278 | 1.80E-09 | 454684 |
| Arm fat mass (left) | rs852042 | 20 | 17091233 | G | A | -0.0142122 | 0.00229928 | 0.758653 | 6.40E-10 | 454684 |
| Arm fat mass (left) | rs4456769 | 20 | 25190777 | T | C | 0.0153668 | 0.00208891 | 0.333376 | 1.90E-13 | 454684 |
| Arm fat mass (left) | rs73142879 | 20 | 51195932 | T | C | -0.0252505 | 0.0025073 | 0.192242 | 7.40E-24 | 454684 |
| Arm fat mass (left) | rs1883711 | 20 | 39179822 | C | G | -0.0348136 | 0.00575256 | 0.031413 | 1.40E-09 | 454684 |
| Arm fat mass (left) | rs1884389 | 20 | 1410582 | T | C | -0.0109016 | 0.00199207 | 0.438147 | 4.40E-08 | 454684 |
| Arm fat mass (left) | rs6069037 | 20 | 53503198 | A | C | -0.0132641 | 0.00222031 | 0.731464 | 2.30E-09 | 454684 |
| Arm fat mass (left) | rs394608 | 21 | 46581798 | C | T | 0.0173276 | 0.00198263 | 0.537742 | 2.30E-18 | 454684 |
| Arm fat mass (left) | rs8126575 | 21 | 46435610 | G | T | -0.0165787 | 0.00290473 | 0.139305 | 1.10E-08 | 454684 |
| Arm fat mass (left) | rs8132491 | 21 | 40288577 | A | G | -0.014636 | 0.00218008 | 0.312993 | 1.90E-11 | 454684 |
| Arm fat mass (left) | rs28489620 | 22 | 41804716 | A | G | -0.016869 | 0.00218664 | 0.290376 | 1.20E-14 | 454684 |
| Arm fat mass (left) | rs11538 | 22 | 18220831 | G | A | 0.0154206 | 0.00260879 | 0.171834 | 3.40E-09 | 454684 |
| Arm fat mass (left) | rs74766656 | 22 | 46662497 | G | A | 0.0181093 | 0.00324734 | 0.10309 | 2.50E-08 | 454684 |
| Arm fat mass (left) | rs713763 | 22 | 48871019 | A | G | 0.0127034 | 0.00200822 | 0.420308 | 2.50E-10 | 454684 |

**Table S2.B Summary of the SNPs (after clumping process) associated with fat mass of right arm (per SD increase)**

| **exposure** | **SNP** | **chromosome** | **position** | **effect_allele** | **other_allele** | **beta** | **se** | **eaf** | **pval** | **samplesize** |
| --- | --- | --- | --- | --- | --- | --- | --- | --- | --- | --- |
| Arm fat mass (right) | rs7537581 | 1 | 2725475 | A | C | 0.0126414 | 0.00197982 | 0.531726 | 1.70E-10 | 454757 |
| Arm fat mass (right) | rs10799778 | 1 | 23313353 | G | T | -0.019983 | 0.00263412 | 0.833688 | 3.30E-14 | 454757 |
| Arm fat mass (right) | rs194656 | 1 | 33423206 | A | G | -0.0138359 | 0.00243289 | 0.203762 | 1.30E-08 | 454757 |
| Arm fat mass (right) | rs2568958 | 1 | 72765116 | A | G | 0.020389 | 0.00200115 | 0.603669 | 2.20E-24 | 454757 |
| Arm fat mass (right) | rs12072739 | 1 | 98315893 | G | A | 0.0175579 | 0.00235343 | 0.224595 | 8.60E-14 | 454757 |
| Arm fat mass (right) | rs41279738 | 1 | 110082551 | G | T | 0.0703263 | 0.00619384 | 0.02594 | 7.10E-30 | 454757 |
| Arm fat mass (right) | rs79518326 | 1 | 174946883 | A | C | -0.0411168 | 0.00594801 | 0.028643 | 4.80E-12 | 454757 |
| Arm fat mass (right) | rs543874 | 1 | 177889480 | G | A | 0.0477034 | 0.00242733 | 0.205281 | 5.50E-86 | 454757 |
| Arm fat mass (right) | rs3845344 | 1 | 75001480 | T | C | 0.015496 | 0.00200863 | 0.391172 | 1.20E-14 | 454757 |
| Arm fat mass (right) | rs12088284 | 1 | 80798635 | T | C | 0.0126126 | 0.00213643 | 0.300908 | 3.60E-09 | 454757 |
| Arm fat mass (right) | rs11165643 | 1 | 96924097 | T | C | 0.0207491 | 0.00199213 | 0.590156 | 2.10E-25 | 454757 |
| Arm fat mass (right) | rs2618039 | 1 | 112324111 | T | A | 0.0128577 | 0.00202066 | 0.381431 | 2.00E-10 | 454757 |
| Arm fat mass (right) | rs61813324 | 1 | 156049877 | T | C | 0.0274036 | 0.00290456 | 0.135709 | 3.90E-21 | 454757 |
| Arm fat mass (right) | rs76702514 | 1 | 195148296 | G | C | -0.0154223 | 0.0024193 | 0.210634 | 1.80E-10 | 454757 |
| Arm fat mass (right) | rs72634826 | 1 | 1601052 | A | G | -0.0181572 | 0.00226749 | 0.259871 | 1.20E-15 | 454757 |
| Arm fat mass (right) | rs4908672 | 1 | 7725414 | T | C | 0.0115083 | 0.00201035 | 0.392937 | 1.00E-08 | 454757 |
| Arm fat mass (right) | rs12140153 | 1 | 62579891 | T | G | -0.0361634 | 0.00343936 | 0.094276 | 7.40E-26 | 454757 |
| Arm fat mass (right) | rs34517439 | 1 | 78450517 | A | C | 0.044017 | 0.00303478 | 0.121685 | 1.10E-47 | 454757 |
| Arm fat mass (right) | rs2678204 | 1 | 201800511 | G | T | 0.0224878 | 0.00206992 | 0.340179 | 1.70E-27 | 454757 |
| Arm fat mass (right) | rs13375176 | 1 | 222099865 | C | T | -0.0140284 | 0.00245339 | 0.201966 | 1.10E-08 | 454757 |
| Arm fat mass (right) | rs10915840 | 1 | 225668524 | A | G | -0.0137971 | 0.00221019 | 0.274233 | 4.30E-10 | 454757 |
| Arm fat mass (right) | rs1205593 | 1 | 11252716 | C | T | -0.014203 | 0.0022968 | 0.759348 | 6.30E-10 | 454757 |
| Arm fat mass (right) | rs3766823 | 1 | 32197257 | A | G | 0.0176252 | 0.00259905 | 0.172018 | 1.20E-11 | 454757 |
| Arm fat mass (right) | rs113603865 | 1 | 39564930 | T | C | 0.0191942 | 0.00241334 | 0.212064 | 1.80E-15 | 454757 |
| Arm fat mass (right) | rs1167311 | 1 | 49996959 | A | G | -0.0186806 | 0.00211921 | 0.681333 | 1.20E-18 | 454757 |
| Arm fat mass (right) | rs1778830 | 1 | 156489974 | A | G | 0.0121917 | 0.00204475 | 0.362104 | 2.50E-09 | 454757 |
| Arm fat mass (right) | rs815163 | 1 | 190294726 | C | T | -0.0151948 | 0.00197513 | 0.563229 | 1.40E-14 | 454757 |
| Arm fat mass (right) | rs2494196 | 1 | 219762581 | A | C | 0.018172 | 0.00216942 | 0.286028 | 5.50E-17 | 454757 |
| Arm fat mass (right) | rs6429425 | 1 | 243590990 | T | G | -0.0167988 | 0.00282858 | 0.139678 | 2.90E-09 | 454757 |
| Arm fat mass (right) | rs12144626 | 1 | 47670525 | C | T | -0.0166768 | 0.00199273 | 0.582788 | 5.80E-17 | 454757 |
| Arm fat mass (right) | rs587271 | 1 | 54743111 | T | C | 0.0133998 | 0.0022057 | 0.686826 | 1.20E-09 | 454757 |
| Arm fat mass (right) | rs7519259 | 1 | 66434743 | A | G | 0.0140314 | 0.00197307 | 0.528345 | 1.10E-12 | 454757 |
| Arm fat mass (right) | rs67807996 | 1 | 149995265 | A | G | 0.016954 | 0.00206841 | 0.395654 | 2.50E-16 | 454757 |
| Arm fat mass (right) | rs61828088 | 1 | 174768522 | A | G | 0.0177152 | 0.00312788 | 0.110448 | 1.50E-08 | 454757 |
| Arm fat mass (right) | rs7516554 | 1 | 210301331 | T | C | 0.0116742 | 0.00200398 | 0.400023 | 5.70E-09 | 454757 |
| Arm fat mass (right) | rs4658403 | 1 | 243832560 | T | C | -0.0170395 | 0.00263545 | 0.833666 | 1.00E-10 | 454757 |
| Arm fat mass (right) | rs396354 | 2 | 86850022 | C | T | -0.014346 | 0.00217888 | 0.715647 | 4.60E-11 | 454757 |
| Arm fat mass (right) | rs13033310 | 2 | 133523605 | A | G | 0.0125421 | 0.00227038 | 0.252787 | 3.30E-08 | 454757 |
| Arm fat mass (right) | rs72868406 | 2 | 154866932 | G | C | 0.0179767 | 0.00322693 | 0.102601 | 2.50E-08 | 454757 |
| Arm fat mass (right) | rs12477385 | 2 | 166144850 | T | G | -0.0135615 | 0.00235178 | 0.225539 | 8.10E-09 | 454757 |
| Arm fat mass (right) | rs16824376 | 2 | 198684342 | T | C | -0.0139043 | 0.0024861 | 0.192697 | 2.20E-08 | 454757 |
| Arm fat mass (right) | rs6744646 | 2 | 628504 | G | A | 0.0518587 | 0.00259812 | 0.828319 | 1.20E-88 | 454757 |
| Arm fat mass (right) | rs3770821 | 2 | 36762126 | C | T | 0.01644 | 0.0020926 | 0.332688 | 4.00E-15 | 454757 |
| Arm fat mass (right) | rs4953424 | 2 | 47041685 | A | G | -0.0121872 | 0.00197281 | 0.478913 | 6.50E-10 | 454757 |
| Arm fat mass (right) | rs11691869 | 2 | 100805996 | A | C | -0.0184692 | 0.00204493 | 0.361915 | 1.70E-19 | 454757 |
| Arm fat mass (right) | rs12993643 | 2 | 144032962 | A | G | 0.0125467 | 0.00214709 | 0.298534 | 5.10E-09 | 454757 |
| Arm fat mass (right) | rs2216931 | 2 | 181599070 | A | C | 0.0164238 | 0.00207503 | 0.661946 | 2.50E-15 | 454757 |
| Arm fat mass (right) | rs56102300 | 2 | 204125268 | T | G | 0.0108575 | 0.00197058 | 0.553712 | 3.60E-08 | 454757 |
| Arm fat mass (right) | rs7568059 | 2 | 222310241 | T | C | -0.0128987 | 0.00226559 | 0.252788 | 1.20E-08 | 454757 |
| Arm fat mass (right) | rs35882248 | 2 | 230627955 | T | C | 0.0176024 | 0.00210794 | 0.317116 | 6.80E-17 | 454757 |
| Arm fat mass (right) | rs1840126 | 2 | 236896765 | C | A | -0.0114507 | 0.00197701 | 0.563605 | 7.00E-09 | 454757 |
| Arm fat mass (right) | rs62107261 | 2 | 422144 | C | T | -0.086268 | 0.00458452 | 0.04832 | 5.50E-79 | 454757 |
| Arm fat mass (right) | rs7561278 | 2 | 48954905 | C | T | -0.0161672 | 0.0023877 | 0.220359 | 1.30E-11 | 454757 |
| Arm fat mass (right) | rs6545714 | 2 | 59307725 | A | G | -0.020273 | 0.00200519 | 0.601467 | 5.00E-24 | 454757 |
| Arm fat mass (right) | rs73985439 | 2 | 212299249 | C | A | 0.0133434 | 0.00212882 | 0.30732 | 3.70E-10 | 454757 |
| Arm fat mass (right) | rs111942358 | 2 | 242568017 | C | G | 0.015354 | 0.00273247 | 0.15335 | 1.90E-08 | 454757 |
| Arm fat mass (right) | rs935166 | 2 | 26949366 | A | G | -0.0159626 | 0.0019624 | 0.506863 | 4.10E-16 | 454757 |
| Arm fat mass (right) | rs4672338 | 2 | 60217457 | T | C | 0.0113963 | 0.00207592 | 0.336277 | 4.00E-08 | 454757 |
| Arm fat mass (right) | rs2861685 | 2 | 67837553 | C | T | -0.0162708 | 0.00198719 | 0.412106 | 2.70E-16 | 454757 |
| Arm fat mass (right) | rs4482463 | 2 | 205375909 | A | C | -0.0308832 | 0.00368829 | 0.92305 | 5.60E-17 | 454757 |
| Arm fat mass (right) | rs13427822 | 2 | 213414265 | G | A | -0.0145804 | 0.00222965 | 0.271195 | 6.20E-11 | 454757 |
| Arm fat mass (right) | rs7571496 | 2 | 6169351 | G | A | -0.0130856 | 0.00224242 | 0.260591 | 5.40E-09 | 454757 |
| Arm fat mass (right) | rs59086897 | 2 | 25145173 | A | T | 0.0280437 | 0.00195939 | 0.487607 | 1.80E-46 | 454757 |
| Arm fat mass (right) | rs10187101 | 2 | 50742227 | T | C | -0.0144786 | 0.00203753 | 0.36361 | 1.20E-12 | 454757 |
| Arm fat mass (right) | rs4671328 | 2 | 58935282 | G | T | -0.0197617 | 0.00198638 | 0.551237 | 2.60E-23 | 454757 |
| Arm fat mass (right) | rs1446585 | 2 | 136407479 | G | A | -0.0142466 | 0.00223536 | 0.24461 | 1.90E-10 | 454757 |
| Arm fat mass (right) | rs429343 | 2 | 147903382 | G | A | -0.0152717 | 0.00198687 | 0.576559 | 1.50E-14 | 454757 |
| Arm fat mass (right) | rs13389219 | 2 | 165528876 | T | C | 0.014154 | 0.00200532 | 0.392423 | 1.70E-12 | 454757 |
| Arm fat mass (right) | rs34234296 | 2 | 175166636 | A | G | -0.0146475 | 0.00202923 | 0.392482 | 5.30E-13 | 454757 |
| Arm fat mass (right) | rs4605363 | 2 | 229010960 | C | A | 0.0148347 | 0.00206624 | 0.341592 | 7.00E-13 | 454757 |
| Arm fat mass (right) | rs62246311 | 3 | 9498143 | A | G | 0.0232169 | 0.00323617 | 0.102332 | 7.30E-13 | 454757 |
| Arm fat mass (right) | rs1801282 | 3 | 12393125 | G | C | 0.0261054 | 0.00301695 | 0.11954 | 5.00E-18 | 454757 |
| Arm fat mass (right) | rs754635 | 3 | 42305131 | G | C | 0.0221768 | 0.00309099 | 0.886582 | 7.20E-13 | 454757 |
| Arm fat mass (right) | rs17668356 | 3 | 61208619 | G | C | -0.0217333 | 0.00277686 | 0.145988 | 5.00E-15 | 454757 |
| Arm fat mass (right) | rs4858940 | 3 | 88254820 | C | T | 0.0232542 | 0.0030812 | 0.885532 | 4.50E-14 | 454757 |
| Arm fat mass (right) | rs2312193 | 3 | 141188399 | C | T | 0.0194538 | 0.00201803 | 0.386829 | 5.40E-22 | 454757 |
| Arm fat mass (right) | rs6790206 | 3 | 161434707 | G | A | 0.0117337 | 0.00196193 | 0.541042 | 2.20E-09 | 454757 |
| Arm fat mass (right) | rs11129446 | 3 | 31410801 | A | T | -0.0129896 | 0.00218318 | 0.285785 | 2.70E-09 | 454757 |
| Arm fat mass (right) | rs13097918 | 3 | 35676330 | A | T | 0.0152082 | 0.00240232 | 0.212291 | 2.40E-10 | 454757 |
| Arm fat mass (right) | rs1554654 | 3 | 44044344 | T | C | -0.0121688 | 0.00196964 | 0.470561 | 6.50E-10 | 454757 |
| Arm fat mass (right) | rs9843653 | 3 | 49920571 | C | T | 0.0255189 | 0.00196353 | 0.511536 | 1.30E-38 | 454757 |
| Arm fat mass (right) | rs9968060 | 3 | 62471282 | T | C | 0.0148128 | 0.00208526 | 0.642606 | 1.20E-12 | 454757 |
| Arm fat mass (right) | rs1454687 | 3 | 94038085 | G | C | -0.0202367 | 0.00196218 | 0.515337 | 6.10E-25 | 454757 |
| Arm fat mass (right) | rs1436348 | 3 | 104612668 | G | A | 0.0141519 | 0.0019897 | 0.582735 | 1.10E-12 | 454757 |
| Arm fat mass (right) | rs6443750 | 3 | 181329682 | C | T | 0.0138767 | 0.00248929 | 0.807889 | 2.50E-08 | 454757 |
| Arm fat mass (right) | rs361222 | 3 | 12922716 | T | A | -0.011239 | 0.00204387 | 0.632511 | 3.80E-08 | 454757 |
| Arm fat mass (right) | rs7619139 | 3 | 25110415 | A | T | 0.0147937 | 0.00199883 | 0.588638 | 1.30E-13 | 454757 |
| Arm fat mass (right) | rs28350 | 3 | 42418446 | G | A | -0.0180839 | 0.0025669 | 0.820612 | 1.90E-12 | 454757 |
| Arm fat mass (right) | rs9839081 | 3 | 123051230 | A | G | -0.0126605 | 0.00212802 | 0.325086 | 2.70E-09 | 454757 |
| Arm fat mass (right) | rs11709402 | 3 | 131551027 | G | A | 0.0219766 | 0.0021957 | 0.278628 | 1.40E-23 | 454757 |
| Arm fat mass (right) | rs13317303 | 3 | 156302724 | A | C | -0.0154297 | 0.00274955 | 0.150182 | 2.00E-08 | 454757 |
| Arm fat mass (right) | rs61791109 | 3 | 170734377 | C | T | 0.0177639 | 0.00219112 | 0.277648 | 5.20E-16 | 454757 |
| Arm fat mass (right) | rs73052033 | 3 | 185828465 | C | T | -0.0243749 | 0.00253072 | 0.185067 | 5.90E-22 | 454757 |
| Arm fat mass (right) | rs6769617 | 3 | 62687746 | T | A | -0.0131347 | 0.00207728 | 0.663996 | 2.60E-10 | 454757 |
| Arm fat mass (right) | rs6782714 | 3 | 71684845 | T | C | -0.0117152 | 0.00201734 | 0.409431 | 6.30E-09 | 454757 |
| Arm fat mass (right) | rs4123668 | 3 | 82629523 | C | T | 0.0127911 | 0.0020033 | 0.402717 | 1.70E-10 | 454757 |
| Arm fat mass (right) | rs9876664 | 3 | 85806313 | T | G | -0.0162945 | 0.00202954 | 0.375523 | 9.90E-16 | 454757 |
| Arm fat mass (right) | rs1471740 | 3 | 136328270 | C | T | 0.0140176 | 0.00224066 | 0.740359 | 3.90E-10 | 454757 |
| Arm fat mass (right) | rs1357079 | 3 | 153691949 | C | T | 0.0159401 | 0.00198598 | 0.57006 | 1.00E-15 | 454757 |
| Arm fat mass (right) | rs4411908 | 3 | 81802418 | C | A | 0.0120594 | 0.00202703 | 0.373412 | 2.70E-09 | 454757 |
| Arm fat mass (right) | rs56172794 | 3 | 184001146 | T | C | -0.0128153 | 0.00196465 | 0.494545 | 6.90E-11 | 454757 |
| Arm fat mass (right) | rs6774894 | 3 | 196116393 | A | T | 0.0136484 | 0.00204479 | 0.358083 | 2.50E-11 | 454757 |
| Arm fat mass (right) | rs10938398 | 4 | 45186139 | A | G | 0.0283565 | 0.00198498 | 0.433506 | 2.70E-46 | 454757 |
| Arm fat mass (right) | rs2237025 | 4 | 55541879 | C | T | -0.0123961 | 0.00199127 | 0.555403 | 4.80E-10 | 454757 |
| Arm fat mass (right) | rs6840236 | 4 | 56289785 | C | T | 0.0118802 | 0.00197017 | 0.464873 | 1.60E-09 | 454757 |
| Arm fat mass (right) | rs13107325 | 4 | 103188709 | T | C | 0.04127 | 0.00373396 | 0.074863 | 2.10E-28 | 454757 |
| Arm fat mass (right) | rs113079574 | 4 | 147354089 | T | C | -0.0160918 | 0.00250163 | 0.192747 | 1.30E-10 | 454757 |
| Arm fat mass (right) | rs1383723 | 4 | 67803507 | T | A | -0.0138253 | 0.00238817 | 0.78315 | 7.10E-09 | 454757 |
| Arm fat mass (right) | rs4419475 | 4 | 96150044 | T | A | 0.0122742 | 0.00199873 | 0.407328 | 8.20E-10 | 454757 |
| Arm fat mass (right) | rs11099020 | 4 | 130724902 | T | C | -0.0141107 | 0.0020499 | 0.640529 | 5.80E-12 | 454757 |
| Arm fat mass (right) | rs7683836 | 4 | 180167906 | A | G | -0.0119244 | 0.00198275 | 0.557263 | 1.80E-09 | 454757 |
| Arm fat mass (right) | rs4261944 | 4 | 31003636 | G | T | 0.011565 | 0.00204473 | 0.364838 | 1.50E-08 | 454757 |
| Arm fat mass (right) | rs11724750 | 4 | 80808820 | C | T | 0.01307 | 0.00199584 | 0.407887 | 5.80E-11 | 454757 |
| Arm fat mass (right) | rs1522569 | 4 | 171632637 | G | T | -0.0141749 | 0.002538 | 0.184286 | 2.30E-08 | 454757 |
| Arm fat mass (right) | rs34811474 | 4 | 25408838 | A | G | -0.0204835 | 0.00232887 | 0.230833 | 1.40E-18 | 454757 |
| Arm fat mass (right) | rs73213484 | 4 | 28489339 | T | A | -0.023642 | 0.00282011 | 0.141226 | 5.10E-17 | 454757 |
| Arm fat mass (right) | rs1229984 | 4 | 100239319 | C | T | 0.037634 | 0.00595902 | 0.97278 | 2.70E-10 | 454757 |
| Arm fat mass (right) | rs1296328 | 4 | 137083193 | C | A | -0.0171088 | 0.0019874 | 0.558991 | 7.40E-18 | 454757 |
| Arm fat mass (right) | rs6536575 | 4 | 162091639 | C | T | 0.0117751 | 0.00196612 | 0.518951 | 2.10E-09 | 454757 |
| Arm fat mass (right) | rs2051559 | 4 | 3298800 | C | T | 0.0161306 | 0.00290173 | 0.132573 | 2.70E-08 | 454757 |
| Arm fat mass (right) | rs10755151 | 4 | 6509955 | T | G | 0.01102 | 0.00197069 | 0.472581 | 2.20E-08 | 454757 |
| Arm fat mass (right) | rs66679256 | 4 | 18351898 | T | C | 0.017722 | 0.00197621 | 0.445796 | 3.00E-19 | 454757 |
| Arm fat mass (right) | rs4088476 | 4 | 34911685 | T | C | 0.0117255 | 0.00207198 | 0.660802 | 1.50E-08 | 454757 |
| Arm fat mass (right) | rs3113509 | 4 | 52932825 | T | C | -0.0152911 | 0.00221793 | 0.731977 | 5.40E-12 | 454757 |
| Arm fat mass (right) | rs12506689 | 4 | 145925105 | A | G | 0.0159043 | 0.00204034 | 0.366018 | 6.40E-15 | 454757 |
| Arm fat mass (right) | rs35375873 | 5 | 43190647 | C | G | -0.0185714 | 0.00314493 | 0.112425 | 3.50E-09 | 454757 |
| Arm fat mass (right) | rs1503526 | 5 | 63020706 | C | T | 0.0146107 | 0.0019654 | 0.479959 | 1.10E-13 | 454757 |
| Arm fat mass (right) | rs10515237 | 5 | 95751549 | G | A | 0.0146669 | 0.0021841 | 0.281869 | 1.90E-11 | 454757 |
| Arm fat mass (right) | rs4958702 | 5 | 153544512 | C | T | -0.0143766 | 0.00198353 | 0.572323 | 4.20E-13 | 454757 |
| Arm fat mass (right) | rs1459190 | 5 | 64070962 | A | G | -0.0135316 | 0.00198397 | 0.51949 | 9.10E-12 | 454757 |
| Arm fat mass (right) | rs7442885 | 5 | 87682877 | G | C | -0.0218223 | 0.00239789 | 0.214115 | 9.00E-20 | 454757 |
| Arm fat mass (right) | rs34483452 | 5 | 87986314 | A | C | 0.0322028 | 0.0028861 | 0.136318 | 6.60E-29 | 454757 |
| Arm fat mass (right) | rs40071 | 5 | 107496102 | C | T | -0.020727 | 0.00256655 | 0.179495 | 6.70E-16 | 454757 |
| Arm fat mass (right) | rs12515239 | 5 | 144692199 | T | C | -0.0121611 | 0.00222339 | 0.276328 | 4.50E-08 | 454757 |
| Arm fat mass (right) | rs114263339 | 5 | 50932343 | T | C | 0.0410461 | 0.00620863 | 0.025705 | 3.80E-11 | 454757 |
| Arm fat mass (right) | rs62379271 | 5 | 105870033 | G | T | 0.0113264 | 0.00199369 | 0.578484 | 1.30E-08 | 454757 |
| Arm fat mass (right) | rs347551 | 5 | 119389031 | G | C | 0.0139443 | 0.00199876 | 0.472312 | 3.00E-12 | 454757 |
| Arm fat mass (right) | rs4502882 | 5 | 153093998 | T | C | -0.0126003 | 0.00206934 | 0.657506 | 1.10E-09 | 454757 |
| Arm fat mass (right) | rs7730898 | 5 | 170459675 | A | G | 0.0188827 | 0.00220993 | 0.729117 | 1.30E-17 | 454757 |
| Arm fat mass (right) | rs698147 | 5 | 3513485 | G | A | -0.0122817 | 0.0019733 | 0.543505 | 4.80E-10 | 454757 |
| Arm fat mass (right) | rs2133561 | 5 | 139086651 | T | A | -0.0172156 | 0.00203581 | 0.611107 | 2.80E-17 | 454757 |
| Arm fat mass (right) | rs9654453 | 5 | 299621 | C | T | 0.0163466 | 0.00293151 | 0.129273 | 2.50E-08 | 454757 |
| Arm fat mass (right) | rs2307111 | 5 | 75003678 | C | T | -0.0271221 | 0.00201004 | 0.395089 | 1.70E-41 | 454757 |
| Arm fat mass (right) | rs252749 | 5 | 77389973 | A | G | -0.0174029 | 0.00227698 | 0.245966 | 2.10E-14 | 454757 |
| Arm fat mass (right) | rs12659431 | 5 | 103903766 | A | G | -0.0124911 | 0.00196667 | 0.534752 | 2.10E-10 | 454757 |
| Arm fat mass (right) | rs7704382 | 5 | 112448114 | G | C | 0.0139011 | 0.00198439 | 0.433414 | 2.50E-12 | 454757 |
| Arm fat mass (right) | rs13156484 | 5 | 122653399 | A | G | -0.014745 | 0.00198672 | 0.472158 | 1.20E-13 | 454757 |
| Arm fat mass (right) | rs329118 | 5 | 133861663 | T | C | -0.0144615 | 0.00199211 | 0.419395 | 3.90E-13 | 454757 |
| Arm fat mass (right) | rs11757278 | 6 | 13180454 | C | T | -0.0136349 | 0.00213589 | 0.303907 | 1.70E-10 | 454757 |
| Arm fat mass (right) | rs72892910 | 6 | 50816887 | T | G | 0.0359564 | 0.00260474 | 0.172212 | 2.40E-43 | 454757 |
| Arm fat mass (right) | rs9375702 | 6 | 130384187 | T | C | -0.0149548 | 0.00212587 | 0.691202 | 2.00E-12 | 454757 |
| Arm fat mass (right) | rs36007635 | 6 | 163009335 | A | G | -0.0184745 | 0.00285098 | 0.137718 | 9.20E-11 | 454757 |
| Arm fat mass (right) | rs9405542 | 6 | 2062700 | T | C | 0.013635 | 0.00245337 | 0.202028 | 2.70E-08 | 454757 |
| Arm fat mass (right) | rs34045288 | 6 | 40369081 | T | C | 0.021495 | 0.00208148 | 0.334429 | 5.30E-25 | 454757 |
| Arm fat mass (right) | rs2499468 | 6 | 51809081 | A | C | 0.014961 | 0.00206224 | 0.650997 | 4.00E-13 | 454757 |
| Arm fat mass (right) | rs9496567 | 6 | 100602753 | A | G | 0.0157054 | 0.00229228 | 0.24339 | 7.30E-12 | 454757 |
| Arm fat mass (right) | rs1031881 | 6 | 124921140 | G | T | 0.0157555 | 0.00261815 | 0.169263 | 1.80E-09 | 454757 |
| Arm fat mass (right) | rs10457469 | 6 | 126083658 | A | G | 0.0131523 | 0.00196586 | 0.523399 | 2.20E-11 | 454757 |
| Arm fat mass (right) | rs2744956 | 6 | 34618937 | C | T | 0.0413841 | 0.00283376 | 0.139111 | 2.60E-48 | 454757 |
| Arm fat mass (right) | rs9294260 | 6 | 83433228 | A | G | 0.0139971 | 0.00197635 | 0.476587 | 1.40E-12 | 454757 |
| Arm fat mass (right) | rs765876 | 6 | 143185891 | G | A | -0.0133809 | 0.00196387 | 0.489443 | 9.50E-12 | 454757 |
| Arm fat mass (right) | rs4870057 | 6 | 152171898 | G | A | 0.0114556 | 0.00209875 | 0.341226 | 4.80E-08 | 454757 |
| Arm fat mass (right) | rs7762794 | 6 | 153380228 | G | A | 0.0132391 | 0.00217298 | 0.285503 | 1.10E-09 | 454757 |
| Arm fat mass (right) | rs28366156 | 6 | 31671498 | C | T | -0.0259117 | 0.00291252 | 0.130602 | 5.80E-19 | 454757 |
| Arm fat mass (right) | rs7761673 | 6 | 70357368 | A | T | -0.013361 | 0.00237552 | 0.219981 | 1.90E-08 | 454757 |
| Arm fat mass (right) | rs6938973 | 6 | 98421721 | C | T | 0.0172954 | 0.00200711 | 0.601538 | 6.90E-18 | 454757 |
| Arm fat mass (right) | rs2253310 | 6 | 108888593 | G | C | 0.0196391 | 0.00202894 | 0.626165 | 3.70E-22 | 454757 |
| Arm fat mass (right) | rs13218383 | 6 | 120173501 | G | C | -0.0146042 | 0.00208022 | 0.335134 | 2.20E-12 | 454757 |
| Arm fat mass (right) | rs4377779 | 6 | 12117344 | C | T | -0.0150892 | 0.00206375 | 0.346834 | 2.60E-13 | 454757 |
| Arm fat mass (right) | rs62396185 | 6 | 26180634 | C | G | -0.0275749 | 0.00224015 | 0.260012 | 8.10E-35 | 454757 |
| Arm fat mass (right) | rs62407565 | 6 | 33535739 | G | A | 0.0140508 | 0.00219494 | 0.275508 | 1.50E-10 | 454757 |
| Arm fat mass (right) | rs4714935 | 6 | 46411142 | A | T | 0.0114591 | 0.00198614 | 0.569174 | 7.90E-09 | 454757 |
| Arm fat mass (right) | rs7776021 | 6 | 73742152 | A | G | 0.0130121 | 0.00216976 | 0.287589 | 2.00E-09 | 454757 |
| Arm fat mass (right) | rs854917 | 6 | 90127390 | T | C | -0.0139786 | 0.0022375 | 0.73579 | 4.20E-10 | 454757 |
| Arm fat mass (right) | rs9478496 | 6 | 154333183 | C | T | 0.0169858 | 0.00265933 | 0.164202 | 1.70E-10 | 454757 |
| Arm fat mass (right) | rs6973700 | 7 | 1856669 | G | A | -0.0157118 | 0.00243164 | 0.206159 | 1.00E-10 | 454757 |
| Arm fat mass (right) | rs4307239 | 7 | 24354300 | G | A | 0.0111412 | 0.00197659 | 0.458843 | 1.70E-08 | 454757 |
| Arm fat mass (right) | rs213518 | 7 | 26941065 | C | T | 0.0182095 | 0.0027889 | 0.145598 | 6.60E-11 | 454757 |
| Arm fat mass (right) | rs2289379 | 7 | 44804225 | T | C | -0.0129865 | 0.00201793 | 0.395696 | 1.20E-10 | 454757 |
| Arm fat mass (right) | rs16868443 | 7 | 93206264 | C | G | 0.0130288 | 0.00204736 | 0.360431 | 2.00E-10 | 454757 |
| Arm fat mass (right) | rs10251591 | 7 | 95150088 | C | T | -0.0153698 | 0.00278062 | 0.146744 | 3.20E-08 | 454757 |
| Arm fat mass (right) | rs10248298 | 7 | 121963813 | A | C | 0.015761 | 0.00203796 | 0.365932 | 1.00E-14 | 454757 |
| Arm fat mass (right) | rs3729793 | 7 | 6431457 | G | C | 0.0190962 | 0.00337552 | 0.093882 | 1.50E-08 | 454757 |
| Arm fat mass (right) | rs4718964 | 7 | 70038969 | T | G | 0.0136839 | 0.00200232 | 0.413112 | 8.30E-12 | 454757 |
| Arm fat mass (right) | rs17149254 | 7 | 76634463 | C | T | -0.0193199 | 0.00254369 | 0.804822 | 3.10E-14 | 454757 |
| Arm fat mass (right) | rs6954290 | 7 | 92283098 | T | G | 0.0133548 | 0.00210473 | 0.324302 | 2.20E-10 | 454757 |
| Arm fat mass (right) | rs4722398 | 7 | 3125220 | T | C | 0.0197763 | 0.00285942 | 0.136115 | 4.60E-12 | 454757 |
| Arm fat mass (right) | rs11525873 | 7 | 138817193 | C | T | -0.0182417 | 0.00331732 | 0.09769 | 3.80E-08 | 454757 |
| Arm fat mass (right) | rs2192649 | 7 | 78126279 | G | T | 0.0115002 | 0.00197746 | 0.5008 | 6.00E-09 | 454757 |
| Arm fat mass (right) | rs2272168 | 7 | 99102777 | C | G | -0.0193311 | 0.0027402 | 0.152431 | 1.70E-12 | 454757 |
| Arm fat mass (right) | rs2396625 | 7 | 113028634 | A | T | -0.0191665 | 0.0020018 | 0.421335 | 1.00E-21 | 454757 |
| Arm fat mass (right) | rs4725984 | 7 | 150668514 | C | T | 0.0154439 | 0.0020617 | 0.642042 | 6.80E-14 | 454757 |
| Arm fat mass (right) | rs1182199 | 7 | 2862542 | A | C | -0.0157103 | 0.00213677 | 0.304423 | 1.90E-13 | 454757 |
| Arm fat mass (right) | rs215634 | 7 | 32369148 | G | A | -0.0149984 | 0.00202374 | 0.61193 | 1.30E-13 | 454757 |
| Arm fat mass (right) | rs3807566 | 7 | 50564204 | T | G | -0.0131619 | 0.00198445 | 0.438361 | 3.30E-11 | 454757 |
| Arm fat mass (right) | rs113852095 | 7 | 71614321 | T | C | -0.0166135 | 0.00257502 | 0.178782 | 1.10E-10 | 454757 |
| Arm fat mass (right) | rs58862095 | 7 | 75081418 | T | C | -0.0194599 | 0.00199656 | 0.419267 | 1.90E-22 | 454757 |
| Arm fat mass (right) | rs6601527 | 8 | 10665444 | A | C | -0.0162021 | 0.00200521 | 0.589112 | 6.50E-16 | 454757 |
| Arm fat mass (right) | rs117176448 | 8 | 27261138 | G | C | 0.0211926 | 0.00333132 | 0.096167 | 2.00E-10 | 454757 |
| Arm fat mass (right) | rs13252030 | 8 | 112491883 | G | A | 0.012611 | 0.00222803 | 0.732614 | 1.50E-08 | 454757 |
| Arm fat mass (right) | rs10099330 | 8 | 143383694 | G | A | 0.0123476 | 0.00197725 | 0.452929 | 4.20E-10 | 454757 |
| Arm fat mass (right) | rs10100245 | 8 | 77226919 | A | G | 0.0204591 | 0.00198462 | 0.564461 | 6.40E-25 | 454757 |
| Arm fat mass (right) | rs7819514 | 8 | 93204442 | A | G | -0.0115539 | 0.00208796 | 0.336879 | 3.10E-08 | 454757 |
| Arm fat mass (right) | rs11778934 | 8 | 116551405 | G | C | -0.0126718 | 0.00197759 | 0.536203 | 1.50E-10 | 454757 |
| Arm fat mass (right) | rs2126320 | 8 | 14333724 | A | G | 0.014503 | 0.0021605 | 0.296658 | 1.90E-11 | 454757 |
| Arm fat mass (right) | rs34215484 | 8 | 43048002 | C | T | -0.0226283 | 0.00398923 | 0.065088 | 1.40E-08 | 454757 |
| Arm fat mass (right) | rs2954021 | 8 | 126482077 | G | A | 0.0155485 | 0.00196588 | 0.504586 | 2.60E-15 | 454757 |
| Arm fat mass (right) | rs62489440 | 8 | 4820914 | A | G | 0.0156304 | 0.00264918 | 0.168122 | 3.60E-09 | 454757 |
| Arm fat mass (right) | rs11781222 | 8 | 23389571 | C | T | -0.0205771 | 0.00286342 | 0.137781 | 6.70E-13 | 454757 |
| Arm fat mass (right) | rs11775287 | 8 | 30864339 | T | C | -0.013068 | 0.00197487 | 0.47573 | 3.70E-11 | 454757 |
| Arm fat mass (right) | rs34571768 | 8 | 57112046 | A | G | -0.0164114 | 0.00299067 | 0.126427 | 4.10E-08 | 454757 |
| Arm fat mass (right) | rs4737188 | 8 | 64756657 | T | A | -0.0132135 | 0.00197109 | 0.473831 | 2.00E-11 | 454757 |
| Arm fat mass (right) | rs1813039 | 8 | 76295984 | A | G | 0.0125908 | 0.00217721 | 0.709753 | 7.30E-09 | 454757 |
| Arm fat mass (right) | rs7828631 | 8 | 132875320 | T | C | 0.0175638 | 0.00314797 | 0.109935 | 2.40E-08 | 454757 |
| Arm fat mass (right) | rs11782074 | 8 | 142617096 | T | G | 0.014469 | 0.00205449 | 0.383641 | 1.90E-12 | 454757 |
| Arm fat mass (right) | rs12679106 | 8 | 73443198 | T | G | -0.0216011 | 0.00217471 | 0.709166 | 3.00E-23 | 454757 |
| Arm fat mass (right) | rs7817485 | 8 | 101969528 | C | T | 0.011178 | 0.00202098 | 0.613196 | 3.20E-08 | 454757 |
| Arm fat mass (right) | rs4876611 | 8 | 116671848 | G | A | 0.0230098 | 0.00219163 | 0.720195 | 8.70E-26 | 454757 |
| Arm fat mass (right) | rs7034554 | 9 | 37081301 | G | A | -0.0131268 | 0.00203042 | 0.373717 | 1.00E-10 | 454757 |
| Arm fat mass (right) | rs11142756 | 9 | 73869960 | T | C | -0.011082 | 0.00197211 | 0.531043 | 1.90E-08 | 454757 |
| Arm fat mass (right) | rs1329733 | 9 | 92208227 | G | A | 0.0135544 | 0.00197319 | 0.474976 | 6.50E-12 | 454757 |
| Arm fat mass (right) | rs3739514 | 9 | 133783025 | A | G | 0.0126879 | 0.00208321 | 0.339633 | 1.10E-09 | 454757 |
| Arm fat mass (right) | rs2095484 | 9 | 11452408 | C | T | -0.011269 | 0.0020217 | 0.387408 | 2.50E-08 | 454757 |
| Arm fat mass (right) | rs10116857 | 9 | 16595649 | A | C | -0.0252702 | 0.00408775 | 0.061826 | 6.30E-10 | 454757 |
| Arm fat mass (right) | rs1330199 | 9 | 27760946 | T | G | -0.0107732 | 0.00197504 | 0.483138 | 4.90E-08 | 454757 |
| Arm fat mass (right) | rs12001437 | 9 | 34074476 | C | T | 0.0116625 | 0.00203869 | 0.367762 | 1.10E-08 | 454757 |
| Arm fat mass (right) | rs28670671 | 9 | 140363045 | C | T | -0.0126259 | 0.00225136 | 0.286021 | 2.00E-08 | 454757 |
| Arm fat mass (right) | rs16916303 | 9 | 30823761 | G | A | -0.0177925 | 0.00306116 | 0.119776 | 6.20E-09 | 454757 |
| Arm fat mass (right) | rs7038943 | 9 | 120377178 | C | T | -0.0145834 | 0.00207422 | 0.338799 | 2.10E-12 | 454757 |
| Arm fat mass (right) | rs34882821 | 9 | 14783314 | T | G | 0.0116511 | 0.00208392 | 0.338502 | 2.30E-08 | 454757 |
| Arm fat mass (right) | rs13292699 | 9 | 15910044 | C | A | -0.0213765 | 0.00198705 | 0.433712 | 5.40E-27 | 454757 |
| Arm fat mass (right) | rs10756798 | 9 | 16739763 | T | C | -0.0153824 | 0.00205131 | 0.642457 | 6.40E-14 | 454757 |
| Arm fat mass (right) | rs10820852 | 9 | 94186973 | A | C | -0.0143018 | 0.00220125 | 0.276306 | 8.20E-11 | 454757 |
| Arm fat mass (right) | rs7027304 | 9 | 129408290 | T | C | 0.0145252 | 0.00207474 | 0.65264 | 2.50E-12 | 454757 |
| Arm fat mass (right) | rs17770336 | 9 | 28414625 | T | C | 0.0230528 | 0.00209912 | 0.322449 | 4.70E-28 | 454757 |
| Arm fat mass (right) | rs725959 | 9 | 81349608 | T | G | -0.0114249 | 0.0020065 | 0.41248 | 1.20E-08 | 454757 |
| Arm fat mass (right) | rs2417084 | 9 | 103119277 | C | T | 0.0177465 | 0.00211172 | 0.315938 | 4.30E-17 | 454757 |
| Arm fat mass (right) | rs28696937 | 9 | 122649882 | T | C | 0.01866 | 0.00324942 | 0.102754 | 9.30E-09 | 454757 |
| Arm fat mass (right) | rs7893571 | 10 | 16750129 | T | G | 0.0140436 | 0.00208934 | 0.665922 | 1.80E-11 | 454757 |
| Arm fat mass (right) | rs6480794 | 10 | 77657971 | A | C | 0.0110799 | 0.00197276 | 0.511218 | 1.90E-08 | 454757 |
| Arm fat mass (right) | rs61871615 | 10 | 102487140 | T | C | -0.0272854 | 0.00357256 | 0.091505 | 2.20E-14 | 454757 |
| Arm fat mass (right) | rs4880341 | 10 | 133992689 | T | C | -0.0133126 | 0.00199167 | 0.576299 | 2.30E-11 | 454757 |
| Arm fat mass (right) | rs12259464 | 10 | 53680099 | A | G | 0.0119704 | 0.00197556 | 0.484606 | 1.40E-09 | 454757 |
| Arm fat mass (right) | rs11017772 | 10 | 132954247 | T | C | -0.0152033 | 0.00243709 | 0.205915 | 4.40E-10 | 454757 |
| Arm fat mass (right) | rs946185 | 10 | 76423739 | G | A | -0.0132254 | 0.00201524 | 0.594803 | 5.30E-11 | 454757 |
| Arm fat mass (right) | rs2439823 | 10 | 99778226 | G | A | 0.0186133 | 0.00197961 | 0.545577 | 5.30E-21 | 454757 |
| Arm fat mass (right) | rs79780963 | 10 | 104952499 | T | C | 0.0230764 | 0.00367505 | 0.077391 | 3.40E-10 | 454757 |
| Arm fat mass (right) | rs7075077 | 10 | 116037239 | G | C | 0.0134726 | 0.00237888 | 0.236617 | 1.50E-08 | 454757 |
| Arm fat mass (right) | rs845084 | 10 | 125220036 | A | G | 0.015491 | 0.00225479 | 0.258342 | 6.40E-12 | 454757 |
| Arm fat mass (right) | rs67609008 | 10 | 126640936 | C | T | 0.0161248 | 0.0021894 | 0.283581 | 1.80E-13 | 454757 |
| Arm fat mass (right) | rs11012732 | 10 | 21830104 | G | A | 0.0198834 | 0.00208889 | 0.331706 | 1.80E-21 | 454757 |
| Arm fat mass (right) | rs34930419 | 10 | 33987329 | C | T | 0.0375296 | 0.00554537 | 0.033187 | 1.30E-11 | 454757 |
| Arm fat mass (right) | rs17399739 | 10 | 87490850 | G | A | 0.0247105 | 0.00388675 | 0.068915 | 2.00E-10 | 454757 |
| Arm fat mass (right) | rs7070670 | 10 | 61842645 | T | C | -0.0128101 | 0.00210691 | 0.327988 | 1.20E-09 | 454757 |
| Arm fat mass (right) | rs10887578 | 10 | 88096047 | C | G | 0.0129629 | 0.00197765 | 0.497525 | 5.60E-11 | 454757 |
| Arm fat mass (right) | rs10510025 | 10 | 118650996 | T | C | 0.0179697 | 0.0022854 | 0.247075 | 3.80E-15 | 454757 |
| Arm fat mass (right) | rs11030016 | 11 | 27487992 | T | C | 0.0170962 | 0.00224479 | 0.739772 | 2.60E-14 | 454757 |
| Arm fat mass (right) | rs801738 | 11 | 65924217 | G | C | -0.0163577 | 0.0020506 | 0.357533 | 1.50E-15 | 454757 |
| Arm fat mass (right) | rs1210223 | 11 | 69501498 | C | G | 0.0112694 | 0.00204257 | 0.631813 | 3.40E-08 | 454757 |
| Arm fat mass (right) | rs4936175 | 11 | 132641959 | C | T | 0.0117663 | 0.00197777 | 0.442749 | 2.70E-09 | 454757 |
| Arm fat mass (right) | rs329651 | 11 | 133767622 | T | G | 0.0138854 | 0.00248825 | 0.804098 | 2.40E-08 | 454757 |
| Arm fat mass (right) | rs28711392 | 11 | 13349559 | C | T | -0.0159048 | 0.00205512 | 0.367364 | 1.00E-14 | 454757 |
| Arm fat mass (right) | rs1013402 | 11 | 27712381 | G | A | 0.0303332 | 0.00210689 | 0.318438 | 5.40E-47 | 454757 |
| Arm fat mass (right) | rs286535 | 11 | 85215938 | C | G | 0.0174977 | 0.00287249 | 0.86466 | 1.10E-09 | 454757 |
| Arm fat mass (right) | rs61903695 | 11 | 89922417 | G | A | 0.0148433 | 0.00225822 | 0.254899 | 4.90E-11 | 454757 |
| Arm fat mass (right) | rs11218510 | 11 | 121922587 | A | G | -0.0131291 | 0.00200949 | 0.400465 | 6.40E-11 | 454757 |
| Arm fat mass (right) | rs7124681 | 11 | 47529947 | A | C | 0.0248017 | 0.00199472 | 0.408393 | 1.70E-35 | 454757 |
| Arm fat mass (right) | rs10160660 | 11 | 76474537 | C | T | -0.0132913 | 0.00241532 | 0.215804 | 3.70E-08 | 454757 |
| Arm fat mass (right) | rs7944782 | 11 | 130795698 | G | T | 0.0157126 | 0.00197551 | 0.509781 | 1.80E-15 | 454757 |
| Arm fat mass (right) | rs12364470 | 11 | 134601012 | G | T | 0.0187671 | 0.0026505 | 0.164513 | 1.40E-12 | 454757 |
| Arm fat mass (right) | rs7946756 | 11 | 851623 | A | T | 0.011818 | 0.00205074 | 0.630312 | 8.30E-09 | 454757 |
| Arm fat mass (right) | rs11042030 | 11 | 8690718 | C | T | -0.0203268 | 0.00220152 | 0.276576 | 2.60E-20 | 454757 |
| Arm fat mass (right) | rs1782508 | 11 | 30243795 | G | C | -0.0139994 | 0.00206534 | 0.655508 | 1.20E-11 | 454757 |
| Arm fat mass (right) | rs55707359 | 11 | 46159333 | G | T | 0.0508451 | 0.00807223 | 0.015448 | 3.00E-10 | 454757 |
| Arm fat mass (right) | rs2846139 | 11 | 65309983 | T | C | 0.0168337 | 0.00238756 | 0.217368 | 1.80E-12 | 454757 |
| Arm fat mass (right) | rs719802 | 11 | 113234679 | C | T | -0.0136623 | 0.00201736 | 0.614396 | 1.30E-11 | 454757 |
| Arm fat mass (right) | rs2507909 | 11 | 115010867 | G | A | -0.0118034 | 0.0019869 | 0.479444 | 2.80E-09 | 454757 |
| Arm fat mass (right) | rs9783304 | 11 | 43660255 | T | G | -0.0230445 | 0.0021247 | 0.689268 | 2.10E-27 | 454757 |
| Arm fat mass (right) | rs1458156 | 12 | 41887940 | T | C | 0.0142057 | 0.00196766 | 0.488492 | 5.20E-13 | 454757 |
| Arm fat mass (right) | rs3759094 | 12 | 56497903 | T | C | -0.0147362 | 0.00208136 | 0.337214 | 1.40E-12 | 454757 |
| Arm fat mass (right) | rs10878349 | 12 | 66327632 | G | A | -0.0132287 | 0.00197064 | 0.513099 | 1.90E-11 | 454757 |
| Arm fat mass (right) | rs7138383 | 12 | 103724090 | A | G | -0.016438 | 0.00225861 | 0.254709 | 3.40E-13 | 454757 |
| Arm fat mass (right) | rs10998 | 12 | 122989412 | A | G | 0.0259614 | 0.00226192 | 0.746788 | 1.70E-30 | 454757 |
| Arm fat mass (right) | rs11057418 | 12 | 124508976 | C | G | -0.0151886 | 0.00250232 | 0.200348 | 1.30E-09 | 454757 |
| Arm fat mass (right) | rs77927866 | 12 | 133487774 | A | G | 0.0122995 | 0.00213365 | 0.311775 | 8.20E-09 | 454757 |
| Arm fat mass (right) | rs145350287 | 12 | 120907309 | A | T | -0.0412502 | 0.00503435 | 0.039613 | 2.50E-16 | 454757 |
| Arm fat mass (right) | rs55726687 | 12 | 991306 | A | G | 0.023709 | 0.00241171 | 0.209742 | 8.30E-23 | 454757 |
| Arm fat mass (right) | rs3730071 | 12 | 49168798 | A | C | -0.0354923 | 0.00574077 | 0.03024 | 6.30E-10 | 454757 |
| Arm fat mass (right) | rs61754230 | 12 | 72179446 | T | C | 0.0434157 | 0.00706767 | 0.019706 | 8.10E-10 | 454757 |
| Arm fat mass (right) | rs11105842 | 12 | 91243910 | A | G | -0.0135034 | 0.00204833 | 0.367528 | 4.30E-11 | 454757 |
| Arm fat mass (right) | rs76895963 | 12 | 4384844 | G | T | 0.059594 | 0.00761869 | 0.020662 | 5.20E-15 | 454757 |
| Arm fat mass (right) | rs10505836 | 12 | 19288508 | C | A | 0.0163955 | 0.00285362 | 0.859998 | 9.20E-09 | 454757 |
| Arm fat mass (right) | rs704061 | 12 | 89771903 | C | T | 0.0176805 | 0.00197373 | 0.455055 | 3.30E-19 | 454757 |
| Arm fat mass (right) | rs12300276 | 12 | 110697965 | A | G | 0.0162651 | 0.00232554 | 0.233952 | 2.70E-12 | 454757 |
| Arm fat mass (right) | rs7132908 | 12 | 50263148 | A | G | 0.0293548 | 0.00202166 | 0.384445 | 9.00E-48 | 454757 |
| Arm fat mass (right) | rs55938344 | 12 | 108310327 | C | A | -0.0155604 | 0.00231459 | 0.241282 | 1.80E-11 | 454757 |
| Arm fat mass (right) | rs3892367 | 12 | 122609582 | A | G | 0.0148792 | 0.00196584 | 0.477968 | 3.80E-14 | 454757 |
| Arm fat mass (right) | rs11842871 | 13 | 31042452 | T | G | -0.0129497 | 0.00224714 | 0.259864 | 8.30E-09 | 454757 |
| Arm fat mass (right) | rs12427676 | 13 | 33382028 | G | A | -0.0116662 | 0.00197844 | 0.479129 | 3.70E-09 | 454757 |
| Arm fat mass (right) | rs72665129 | 13 | 104092350 | A | T | -0.0173383 | 0.00271504 | 0.161072 | 1.70E-10 | 454757 |
| Arm fat mass (right) | rs1967772 | 13 | 28036062 | A | G | -0.0167984 | 0.00219085 | 0.285216 | 1.80E-14 | 454757 |
| Arm fat mass (right) | rs4397962 | 13 | 28687084 | C | T | 0.0135116 | 0.00238114 | 0.220956 | 1.40E-08 | 454757 |
| Arm fat mass (right) | rs1441264 | 13 | 79580919 | A | G | 0.0174153 | 0.00204644 | 0.593696 | 1.70E-17 | 454757 |
| Arm fat mass (right) | rs61969510 | 13 | 86484025 | C | T | 0.0159849 | 0.00221224 | 0.279012 | 5.00E-13 | 454757 |
| Arm fat mass (right) | rs9556582 | 13 | 97040531 | A | G | 0.0129046 | 0.00199231 | 0.448829 | 9.30E-11 | 454757 |
| Arm fat mass (right) | rs9522183 | 13 | 111977280 | T | G | -0.0141335 | 0.00199603 | 0.561735 | 1.40E-12 | 454757 |
| Arm fat mass (right) | rs9532583 | 13 | 41256473 | G | T | -0.0133934 | 0.00217163 | 0.288417 | 6.90E-10 | 454757 |
| Arm fat mass (right) | rs1336486 | 13 | 40784814 | G | T | 0.0149054 | 0.00209785 | 0.328625 | 1.20E-12 | 454757 |
| Arm fat mass (right) | rs9568867 | 13 | 54107352 | A | G | 0.0312156 | 0.0029568 | 0.12918 | 4.70E-26 | 454757 |
| Arm fat mass (right) | rs4055791 | 13 | 59266053 | T | C | -0.0155588 | 0.00199675 | 0.416764 | 6.60E-15 | 454757 |
| Arm fat mass (right) | rs9788550 | 14 | 29681138 | C | G | -0.0217136 | 0.00228834 | 0.247503 | 2.30E-21 | 454757 |
| Arm fat mass (right) | rs12881629 | 14 | 101146413 | G | A | 0.0215531 | 0.00356842 | 0.082645 | 1.50E-09 | 454757 |
| Arm fat mass (right) | rs3803286 | 14 | 103246470 | G | A | -0.0164483 | 0.00208612 | 0.666749 | 3.20E-15 | 454757 |
| Arm fat mass (right) | rs4900590 | 14 | 104146421 | T | C | 0.0131802 | 0.00210486 | 0.324467 | 3.80E-10 | 454757 |
| Arm fat mass (right) | rs12883788 | 14 | 33303540 | T | C | 0.0177856 | 0.00198113 | 0.459757 | 2.80E-19 | 454757 |
| Arm fat mass (right) | rs4430672 | 14 | 63094407 | C | T | -0.0138479 | 0.0024681 | 0.80093 | 2.00E-08 | 454757 |
| Arm fat mass (right) | rs3902951 | 14 | 69789755 | G | T | 0.0136809 | 0.00233863 | 0.237192 | 4.90E-09 | 454757 |
| Arm fat mass (right) | rs61983990 | 14 | 41475003 | A | G | 0.0219858 | 0.00359061 | 0.082495 | 9.20E-10 | 454757 |
| Arm fat mass (right) | rs12885458 | 14 | 47303114 | G | T | -0.0144407 | 0.00197036 | 0.507982 | 2.30E-13 | 454757 |
| Arm fat mass (right) | rs4982753 | 14 | 23814569 | T | C | -0.0132601 | 0.0022709 | 0.257516 | 5.20E-09 | 454757 |
| Arm fat mass (right) | rs1470705 | 14 | 88366104 | C | T | -0.0132796 | 0.00226916 | 0.746464 | 4.90E-09 | 454757 |
| Arm fat mass (right) | rs61992671 | 14 | 101531854 | G | A | -0.0148368 | 0.00205724 | 0.492056 | 5.50E-13 | 454757 |
| Arm fat mass (right) | rs217672 | 14 | 62361021 | C | A | 0.0168054 | 0.00221708 | 0.271726 | 3.50E-14 | 454757 |
| Arm fat mass (right) | rs10146997 | 14 | 79945162 | G | A | 0.0263636 | 0.00236745 | 0.221855 | 8.40E-29 | 454757 |
| Arm fat mass (right) | rs1286058 | 14 | 91458523 | A | T | 0.0120618 | 0.00215653 | 0.703741 | 2.20E-08 | 454757 |
| Arm fat mass (right) | rs6575340 | 14 | 94023972 | A | G | 0.0194445 | 0.00204973 | 0.63603 | 2.40E-21 | 454757 |
| Arm fat mass (right) | rs3784710 | 15 | 68072458 | C | T | -0.0286535 | 0.00234641 | 0.226632 | 2.70E-34 | 454757 |
| Arm fat mass (right) | rs34769775 | 15 | 80989172 | T | C | -0.0150772 | 0.00215372 | 0.29742 | 2.50E-12 | 454757 |
| Arm fat mass (right) | rs1871360 | 15 | 95276540 | A | T | -0.0122926 | 0.00206469 | 0.366644 | 2.60E-09 | 454757 |
| Arm fat mass (right) | rs35697691 | 15 | 52353498 | G | C | 0.025448 | 0.00349974 | 0.089409 | 3.60E-13 | 454757 |
| Arm fat mass (right) | rs72767957 | 15 | 99240793 | G | A | -0.0173098 | 0.00246196 | 0.200137 | 2.10E-12 | 454757 |
| Arm fat mass (right) | rs72757416 | 15 | 92574321 | C | A | -0.0142898 | 0.00241958 | 0.217705 | 3.50E-09 | 454757 |
| Arm fat mass (right) | rs28826668 | 15 | 26978251 | T | C | -0.012531 | 0.00218273 | 0.286553 | 9.40E-09 | 454757 |
| Arm fat mass (right) | rs2460 | 15 | 53073084 | A | G | 0.0135572 | 0.00224095 | 0.262609 | 1.50E-09 | 454757 |
| Arm fat mass (right) | rs7171864 | 15 | 73227249 | A | G | 0.0159198 | 0.00208714 | 0.660088 | 2.40E-14 | 454757 |
| Arm fat mass (right) | rs2135877 | 15 | 84663107 | G | A | 0.0130954 | 0.00209894 | 0.32782 | 4.40E-10 | 454757 |
| Arm fat mass (right) | rs1657930 | 15 | 57120989 | A | G | -0.0148074 | 0.00247162 | 0.803027 | 2.10E-09 | 454757 |
| Arm fat mass (right) | rs168144 | 15 | 60914262 | T | C | 0.0116741 | 0.00199086 | 0.569917 | 4.50E-09 | 454757 |
| Arm fat mass (right) | rs3814883 | 16 | 29994922 | T | C | 0.0254691 | 0.00197279 | 0.482231 | 3.90E-38 | 454757 |
| Arm fat mass (right) | rs56094641 | 16 | 53806453 | G | A | 0.065777 | 0.00200235 | 0.404657 | 1.00E-200 | 454757 |
| Arm fat mass (right) | rs1057042 | 16 | 89857622 | C | T | -0.0119838 | 0.00209973 | 0.326583 | 1.10E-08 | 454757 |
| Arm fat mass (right) | rs7201895 | 16 | 407723 | A | G | -0.0146588 | 0.00206801 | 0.354229 | 1.40E-12 | 454757 |
| Arm fat mass (right) | rs7498665 | 16 | 28883241 | G | A | 0.0307394 | 0.0020085 | 0.399535 | 7.10E-53 | 454757 |
| Arm fat mass (right) | rs2917677 | 16 | 69750849 | T | C | -0.0202471 | 0.00200069 | 0.410716 | 4.50E-24 | 454757 |
| Arm fat mass (right) | rs9926784 | 16 | 19941968 | C | T | -0.0195033 | 0.00253236 | 0.1845 | 1.30E-14 | 454757 |
| Arm fat mass (right) | rs35154326 | 16 | 24862414 | G | A | -0.0153861 | 0.00222133 | 0.274041 | 4.30E-12 | 454757 |
| Arm fat mass (right) | rs756717 | 16 | 72996162 | A | G | -0.0144368 | 0.00203172 | 0.399011 | 1.20E-12 | 454757 |
| Arm fat mass (right) | rs2930227 | 16 | 85326214 | T | G | -0.013899 | 0.00241249 | 0.788232 | 8.30E-09 | 454757 |
| Arm fat mass (right) | rs879620 | 16 | 4015729 | T | C | 0.0242134 | 0.00202429 | 0.613271 | 5.70E-33 | 454757 |
| Arm fat mass (right) | rs2075466 | 16 | 4872970 | C | G | 0.0132462 | 0.00222323 | 0.267184 | 2.60E-09 | 454757 |
| Arm fat mass (right) | rs11150461 | 16 | 82448195 | G | C | -0.0135177 | 0.00221619 | 0.727442 | 1.10E-09 | 454757 |
| Arm fat mass (right) | rs889495 | 16 | 2233565 | C | T | -0.0125186 | 0.00201919 | 0.582684 | 5.70E-10 | 454757 |
| Arm fat mass (right) | rs35949039 | 16 | 70572605 | T | G | -0.0188646 | 0.00322357 | 0.105574 | 4.90E-09 | 454757 |
| Arm fat mass (right) | rs9673839 | 16 | 76895693 | G | A | 0.0122835 | 0.00197664 | 0.490974 | 5.20E-10 | 454757 |
| Arm fat mass (right) | rs3826408 | 17 | 7101292 | T | C | 0.0129859 | 0.00197404 | 0.456871 | 4.80E-11 | 454757 |
| Arm fat mass (right) | rs11150745 | 17 | 78757626 | G | A | -0.0198278 | 0.00211699 | 0.317691 | 7.50E-21 | 454757 |
| Arm fat mass (right) | rs8076669 | 17 | 15888448 | C | T | 0.0128231 | 0.00198452 | 0.561566 | 1.00E-10 | 454757 |
| Arm fat mass (right) | rs1017529 | 17 | 27912415 | A | C | 0.0170818 | 0.00263796 | 0.174807 | 9.50E-11 | 454757 |
| Arm fat mass (right) | rs2306593 | 17 | 34866546 | T | C | -0.0154557 | 0.0019728 | 0.488173 | 4.70E-15 | 454757 |
| Arm fat mass (right) | rs4790841 | 17 | 1835482 | T | C | -0.027357 | 0.00273386 | 0.154505 | 1.40E-23 | 454757 |
| Arm fat mass (right) | rs3848453 | 17 | 68362094 | C | T | -0.0109133 | 0.00200096 | 0.583714 | 4.90E-08 | 454757 |
| Arm fat mass (right) | rs35537311 | 17 | 71126150 | T | C | -0.0118259 | 0.00202239 | 0.388524 | 5.00E-09 | 454757 |
| Arm fat mass (right) | rs9906072 | 17 | 21245687 | C | T | -0.0125147 | 0.00210539 | 0.514166 | 2.80E-09 | 454757 |
| Arm fat mass (right) | rs59237168 | 17 | 31479035 | C | T | -0.015358 | 0.00239517 | 0.215633 | 1.40E-10 | 454757 |
| Arm fat mass (right) | rs9916444 | 17 | 42313512 | G | C | 0.0135016 | 0.00207764 | 0.341688 | 8.10E-11 | 454757 |
| Arm fat mass (right) | rs113866544 | 17 | 46270606 | C | T | 0.0359408 | 0.00390496 | 0.068319 | 3.50E-20 | 454757 |
| Arm fat mass (right) | rs7218014 | 17 | 65832016 | C | T | 0.0235274 | 0.0024773 | 0.197309 | 2.20E-21 | 454757 |
| Arm fat mass (right) | rs67560975 | 17 | 47142930 | C | T | 0.0183935 | 0.00308128 | 0.115927 | 2.40E-09 | 454757 |
| Arm fat mass (right) | rs3935190 | 17 | 79084367 | A | G | -0.0154765 | 0.00198523 | 0.536703 | 6.40E-15 | 454757 |
| Arm fat mass (right) | rs6567160 | 18 | 57829135 | C | T | 0.0525776 | 0.00232841 | 0.232665 | 6.70E-113 | 454757 |
| Arm fat mass (right) | rs57636386 | 18 | 58048295 | C | T | -0.0396118 | 0.00356156 | 0.083836 | 9.80E-29 | 454757 |
| Arm fat mass (right) | rs12956148 | 18 | 63429049 | A | C | 0.0146592 | 0.00219918 | 0.27765 | 2.60E-11 | 454757 |
| Arm fat mass (right) | rs9955276 | 18 | 1839339 | T | C | 0.0201869 | 0.00281299 | 0.144428 | 7.20E-13 | 454757 |
| Arm fat mass (right) | rs784257 | 18 | 53397199 | C | T | 0.0139713 | 0.00253423 | 0.812497 | 3.50E-08 | 454757 |
| Arm fat mass (right) | rs6507720 | 18 | 21119291 | G | A | -0.0225158 | 0.00196891 | 0.490584 | 2.80E-30 | 454757 |
| Arm fat mass (right) | rs2052607 | 18 | 40788387 | A | G | -0.0173906 | 0.00207715 | 0.343889 | 5.60E-17 | 454757 |
| Arm fat mass (right) | rs11664848 | 18 | 42575661 | G | C | 0.013733 | 0.00208513 | 0.65962 | 4.50E-11 | 454757 |
| Arm fat mass (right) | rs8093356 | 18 | 2664532 | T | C | -0.0147172 | 0.00235301 | 0.226981 | 4.00E-10 | 454757 |
| Arm fat mass (right) | rs4800191 | 18 | 22461398 | C | G | 0.0112738 | 0.0020625 | 0.641806 | 4.60E-08 | 454757 |
| Arm fat mass (right) | rs8096564 | 18 | 39910592 | T | G | 0.0143373 | 0.00216327 | 0.298126 | 3.40E-11 | 454757 |
| Arm fat mass (right) | rs9951619 | 18 | 56882326 | G | T | 0.0154158 | 0.00234379 | 0.767275 | 4.80E-11 | 454757 |
| Arm fat mass (right) | rs56356382 | 19 | 4064057 | C | T | -0.0175044 | 0.00250724 | 0.192342 | 2.90E-12 | 454757 |
| Arm fat mass (right) | rs113230003 | 19 | 18460956 | A | G | -0.0192941 | 0.00226079 | 0.260532 | 1.40E-17 | 454757 |
| Arm fat mass (right) | rs12462975 | 19 | 30272202 | A | G | 0.0208545 | 0.0021081 | 0.329603 | 4.50E-23 | 454757 |
| Arm fat mass (right) | rs429358 | 19 | 45411941 | C | T | -0.0252399 | 0.00272822 | 0.154046 | 2.20E-20 | 454757 |
| Arm fat mass (right) | rs10423928 | 19 | 46182304 | A | T | -0.0306919 | 0.00248325 | 0.19443 | 4.30E-35 | 454757 |
| Arm fat mass (right) | rs10404726 | 19 | 18834514 | T | C | -0.019146 | 0.00197607 | 0.465524 | 3.40E-22 | 454757 |
| Arm fat mass (right) | rs2903738 | 19 | 32946043 | T | A | -0.0131559 | 0.00237077 | 0.221375 | 2.90E-08 | 454757 |
| Arm fat mass (right) | rs585066 | 19 | 34317166 | T | C | 0.0120709 | 0.0019752 | 0.466952 | 9.90E-10 | 454757 |
| Arm fat mass (right) | rs11667638 | 19 | 1841501 | G | A | 0.0123318 | 0.00197249 | 0.528531 | 4.10E-10 | 454757 |
| Arm fat mass (right) | rs56187939 | 19 | 1970668 | G | A | -0.0121798 | 0.00213848 | 0.304614 | 1.20E-08 | 454757 |
| Arm fat mass (right) | rs7250833 | 19 | 33937277 | T | C | 0.0168873 | 0.00217505 | 0.288873 | 8.20E-15 | 454757 |
| Arm fat mass (right) | rs273505 | 19 | 18217147 | C | T | 0.018186 | 0.00199378 | 0.422062 | 7.40E-20 | 454757 |
| Arm fat mass (right) | rs7259070 | 19 | 47562509 | C | T | 0.0187075 | 0.00202436 | 0.596195 | 2.40E-20 | 454757 |
| Arm fat mass (right) | rs56374036 | 20 | 46367372 | G | A | -0.0146313 | 0.00242296 | 0.212663 | 1.60E-09 | 454757 |
| Arm fat mass (right) | rs6058209 | 20 | 33821577 | A | G | 0.0147193 | 0.00210889 | 0.32203 | 3.00E-12 | 454757 |
| Arm fat mass (right) | rs73142879 | 20 | 51195932 | T | C | -0.0257841 | 0.00250742 | 0.192241 | 8.40E-25 | 454757 |
| Arm fat mass (right) | rs6069037 | 20 | 53503198 | A | C | -0.0124847 | 0.00222035 | 0.731453 | 1.90E-08 | 454757 |
| Arm fat mass (right) | rs1056441 | 20 | 62370349 | C | T | 0.0132966 | 0.00210322 | 0.675288 | 2.60E-10 | 454757 |
| Arm fat mass (right) | rs1883711 | 20 | 39179822 | C | G | -0.035239 | 0.0057531 | 0.031409 | 9.10E-10 | 454757 |
| Arm fat mass (right) | rs1884389 | 20 | 1410582 | T | C | -0.0111372 | 0.00199215 | 0.438139 | 2.30E-08 | 454757 |
| Arm fat mass (right) | rs947088 | 20 | 17171373 | T | G | 0.0132706 | 0.00219449 | 0.717993 | 1.50E-09 | 454757 |
| Arm fat mass (right) | rs4456769 | 20 | 25190777 | T | C | 0.0156721 | 0.00208896 | 0.333384 | 6.30E-14 | 454757 |
| Arm fat mass (right) | rs8133137 | 21 | 40290503 | G | A | 0.0136931 | 0.00208688 | 0.664131 | 5.30E-11 | 454757 |
| Arm fat mass (right) | rs394608 | 21 | 46581798 | C | T | 0.017431 | 0.00198273 | 0.537742 | 1.50E-18 | 454757 |
| Arm fat mass (right) | rs713763 | 22 | 48871019 | A | G | 0.012981 | 0.00200832 | 0.420312 | 1.00E-10 | 454757 |
| Arm fat mass (right) | rs11538 | 22 | 18220831 | G | A | 0.016006 | 0.00260892 | 0.171834 | 8.50E-10 | 454757 |
| Arm fat mass (right) | rs2267373 | 22 | 38600542 | T | C | -0.0150299 | 0.00200032 | 0.580831 | 5.70E-14 | 454757 |
| Arm fat mass (right) | rs139911 | 22 | 40704052 | T | C | -0.0119871 | 0.00200144 | 0.575878 | 2.10E-09 | 454757 |

**Table S2.C Summary of the SNPs (after clumping process) associated with fat percentage of left arm (per SD increase)**

| **exposure** | **SNP** | **chromosome** | **position** | **effect_allele** | **other_allele** | **beta** | **se** | **eaf** | **pval** | **samplesize** |
| --- | --- | --- | --- | --- | --- | --- | --- | --- | --- | --- |
| Arm fat percentage (left) | rs79113395 | 1 | 1590521 | A | G | -0.0141803 | 0.0017275 | 0.26521 | 2.20E-16 | 454724 |
| Arm fat percentage (left) | rs14057 | 1 | 6683240 | A | G | -0.00920871 | 0.00158932 | 0.356592 | 6.90E-09 | 454724 |
| Arm fat percentage (left) | rs156914 | 1 | 16848652 | A | G | 0.00868925 | 0.0015198 | 0.491816 | 1.10E-08 | 454724 |
| Arm fat percentage (left) | rs147860177 | 1 | 39554034 | G | T | 0.0121384 | 0.00181598 | 0.232167 | 2.30E-11 | 454724 |
| Arm fat percentage (left) | rs6693294 | 1 | 49879122 | G | A | -0.0124436 | 0.00164018 | 0.688578 | 3.30E-14 | 454724 |
| Arm fat percentage (left) | rs7519259 | 1 | 66434743 | A | G | 0.00969498 | 0.00152807 | 0.52834 | 2.20E-10 | 454724 |
| Arm fat percentage (left) | rs12088284 | 1 | 80798635 | T | C | 0.00946395 | 0.0016546 | 0.300907 | 1.10E-08 | 454724 |
| Arm fat percentage (left) | rs12042959 | 1 | 243533273 | G | A | -0.0134376 | 0.00217476 | 0.143927 | 6.50E-10 | 454724 |
| Arm fat percentage (left) | rs1689265 | 1 | 29459117 | G | A | 0.0155158 | 0.00264879 | 0.909227 | 4.70E-09 | 454724 |
| Arm fat percentage (left) | rs144376234 | 1 | 110114504 | T | C | 0.0554265 | 0.0048133 | 0.025644 | 1.10E-30 | 454724 |
| Arm fat percentage (left) | rs1336899 | 1 | 150678910 | C | T | -0.00872887 | 0.00155521 | 0.393499 | 2.00E-08 | 454724 |
| Arm fat percentage (left) | rs79518326 | 1 | 174946883 | A | C | -0.0277127 | 0.00460696 | 0.028639 | 1.80E-09 | 454724 |
| Arm fat percentage (left) | rs815163 | 1 | 190294726 | C | T | -0.0106301 | 0.00152967 | 0.563223 | 3.70E-12 | 454724 |
| Arm fat percentage (left) | rs6669341 | 1 | 47678458 | G | A | -0.0130045 | 0.00153958 | 0.582716 | 3.00E-17 | 454724 |
| Arm fat percentage (left) | rs12033257 | 1 | 112318484 | G | A | -0.0092296 | 0.00157428 | 0.382348 | 4.60E-09 | 454724 |
| Arm fat percentage (left) | rs67807996 | 1 | 149995265 | A | G | 0.0156864 | 0.00160191 | 0.395644 | 1.20E-22 | 454724 |
| Arm fat percentage (left) | rs2678204 | 1 | 201800511 | G | T | 0.0142488 | 0.00160307 | 0.340185 | 6.20E-19 | 454724 |
| Arm fat percentage (left) | rs13375176 | 1 | 222099865 | C | T | -0.0130227 | 0.00190007 | 0.201965 | 7.20E-12 | 454724 |
| Arm fat percentage (left) | rs10799778 | 1 | 23313353 | G | T | -0.0145844 | 0.00203999 | 0.83368 | 8.70E-13 | 454724 |
| Arm fat percentage (left) | rs3766823 | 1 | 32197257 | A | G | 0.0130137 | 0.00201287 | 0.172019 | 1.00E-10 | 454724 |
| Arm fat percentage (left) | rs12140153 | 1 | 62579891 | T | G | -0.0253502 | 0.00266362 | 0.094279 | 1.80E-21 | 454724 |
| Arm fat percentage (left) | rs11165643 | 1 | 96924097 | T | C | 0.0148041 | 0.00154287 | 0.590152 | 8.40E-22 | 454724 |
| Arm fat percentage (left) | rs12072739 | 1 | 98315893 | G | A | 0.013523 | 0.00182267 | 0.224594 | 1.20E-13 | 454724 |
| Arm fat percentage (left) | rs61813324 | 1 | 156049877 | T | C | 0.0195695 | 0.00224951 | 0.135713 | 3.30E-18 | 454724 |
| Arm fat percentage (left) | rs17781552 | 1 | 203519648 | A | G | 0.00857816 | 0.00154564 | 0.545293 | 2.90E-08 | 454724 |
| Arm fat percentage (left) | rs1377184 | 1 | 215246432 | T | A | 0.0111422 | 0.00175841 | 0.748944 | 2.40E-10 | 454724 |
| Arm fat percentage (left) | rs2820446 | 1 | 219748818 | G | C | 0.0182523 | 0.00165904 | 0.297287 | 3.70E-28 | 454724 |
| Arm fat percentage (left) | rs67373773 | 1 | 2710377 | A | G | -0.00919865 | 0.00153054 | 0.439101 | 1.90E-09 | 454724 |
| Arm fat percentage (left) | rs71658797 | 1 | 77967507 | A | T | 0.0238357 | 0.00233573 | 0.120738 | 1.90E-24 | 454724 |
| Arm fat percentage (left) | rs543874 | 1 | 177889480 | G | A | 0.0329544 | 0.00187993 | 0.205275 | 8.50E-69 | 454724 |
| Arm fat percentage (left) | rs76702514 | 1 | 195148296 | G | C | -0.0121318 | 0.00187363 | 0.210645 | 9.50E-11 | 454724 |
| Arm fat percentage (left) | rs10922199 | 1 | 197317238 | A | G | 0.00903956 | 0.0016378 | 0.329252 | 3.40E-08 | 454724 |
| Arm fat percentage (left) | rs4562625 | 1 | 209218583 | G | C | -0.0100671 | 0.00155989 | 0.614934 | 1.10E-10 | 454724 |
| Arm fat percentage (left) | rs59086897 | 2 | 25145173 | A | T | 0.026721 | 0.0015173 | 0.487597 | 2.00E-69 | 454724 |
| Arm fat percentage (left) | rs811494 | 2 | 44725047 | G | T | 0.00984383 | 0.00176215 | 0.753303 | 2.30E-08 | 454724 |
| Arm fat percentage (left) | rs4673617 | 2 | 212290579 | T | C | 0.0108941 | 0.00171159 | 0.271779 | 2.00E-10 | 454724 |
| Arm fat percentage (left) | rs12992672 | 2 | 632592 | A | G | 0.0314729 | 0.00200938 | 0.828112 | 2.70E-55 | 454724 |
| Arm fat percentage (left) | rs6705567 | 2 | 55320173 | C | T | -0.0105511 | 0.00157834 | 0.375911 | 2.30E-11 | 454724 |
| Arm fat percentage (left) | rs3087523 | 2 | 105977776 | A | G | 0.0135562 | 0.00231182 | 0.124619 | 4.50E-09 | 454724 |
| Arm fat percentage (left) | rs429343 | 2 | 147903382 | G | A | -0.0118182 | 0.00153857 | 0.576554 | 1.60E-14 | 454724 |
| Arm fat percentage (left) | rs2356505 | 2 | 159534863 | G | A | 0.00918715 | 0.0016005 | 0.650288 | 9.50E-09 | 454724 |
| Arm fat percentage (left) | rs13389219 | 2 | 165528876 | T | C | 0.0153266 | 0.00155283 | 0.392416 | 5.60E-23 | 454724 |
| Arm fat percentage (left) | rs1453055 | 2 | 181329491 | A | G | 0.0120533 | 0.00171158 | 0.273342 | 1.90E-12 | 454724 |
| Arm fat percentage (left) | rs4850788 | 2 | 198182940 | A | G | 0.00878627 | 0.00156125 | 0.384643 | 1.80E-08 | 454724 |
| Arm fat percentage (left) | rs4482463 | 2 | 205375909 | A | C | -0.0222646 | 0.00285623 | 0.923059 | 6.40E-15 | 454724 |
| Arm fat percentage (left) | rs62190394 | 2 | 230624929 | T | C | 0.0140103 | 0.00163241 | 0.317039 | 9.30E-18 | 454724 |
| Arm fat percentage (left) | rs62106258 | 2 | 417167 | C | T | -0.0566363 | 0.00353006 | 0.048535 | 6.30E-58 | 454724 |
| Arm fat percentage (left) | rs6736194 | 2 | 11500058 | G | C | 0.00952323 | 0.00154402 | 0.58102 | 6.90E-10 | 454724 |
| Arm fat percentage (left) | rs935166 | 2 | 26949366 | A | G | -0.0119534 | 0.00151959 | 0.506865 | 3.70E-15 | 454724 |
| Arm fat percentage (left) | rs1861410 | 2 | 58933591 | T | C | -0.0138082 | 0.00153224 | 0.555358 | 2.00E-19 | 454724 |
| Arm fat percentage (left) | rs7422252 | 2 | 69528577 | T | C | 0.0125544 | 0.00154888 | 0.591448 | 5.30E-16 | 454724 |
| Arm fat percentage (left) | rs62147189 | 2 | 86807853 | G | T | -0.00973146 | 0.00158712 | 0.622281 | 8.70E-10 | 454724 |
| Arm fat percentage (left) | rs11691869 | 2 | 100805996 | A | C | -0.0138888 | 0.0015835 | 0.361916 | 1.80E-18 | 454724 |
| Arm fat percentage (left) | rs12471400 | 2 | 202917009 | C | T | 0.00926823 | 0.00152568 | 0.517362 | 1.20E-09 | 454724 |
| Arm fat percentage (left) | rs13427822 | 2 | 213414265 | G | A | -0.00976317 | 0.00172652 | 0.271195 | 1.60E-08 | 454724 |
| Arm fat percentage (left) | rs4605363 | 2 | 229010960 | C | A | 0.0119031 | 0.00160001 | 0.341588 | 1.00E-13 | 454724 |
| Arm fat percentage (left) | rs3770821 | 2 | 36762126 | C | T | 0.0113299 | 0.00162042 | 0.332691 | 2.70E-12 | 454724 |
| Arm fat percentage (left) | rs34606703 | 2 | 47014522 | A | G | -0.0134022 | 0.00158728 | 0.357996 | 3.10E-17 | 454724 |
| Arm fat percentage (left) | rs6545714 | 2 | 59307725 | A | G | -0.0155934 | 0.00155274 | 0.601479 | 9.90E-24 | 454724 |
| Arm fat percentage (left) | rs6711390 | 2 | 135629439 | T | C | -0.0102463 | 0.00156183 | 0.371296 | 5.40E-11 | 454724 |
| Arm fat percentage (left) | rs1048013 | 2 | 204154552 | T | C | 0.00920245 | 0.00152736 | 0.555522 | 1.70E-09 | 454724 |
| Arm fat percentage (left) | rs10187101 | 2 | 50742227 | T | C | -0.0106962 | 0.00157779 | 0.363606 | 1.20E-11 | 454724 |
| Arm fat percentage (left) | rs2692741 | 2 | 76185292 | C | G | 0.00884898 | 0.00158984 | 0.367181 | 2.60E-08 | 454724 |
| Arm fat percentage (left) | rs114964326 | 2 | 146015229 | A | G | -0.0253037 | 0.00456286 | 0.028988 | 2.90E-08 | 454724 |
| Arm fat percentage (left) | rs764729 | 2 | 161126732 | C | A | 0.010159 | 0.00170873 | 0.72802 | 2.80E-09 | 454724 |
| Arm fat percentage (left) | rs2943653 | 2 | 227047771 | T | C | -0.0151861 | 0.00161773 | 0.672841 | 6.20E-21 | 454724 |
| Arm fat percentage (left) | rs1840126 | 2 | 236896765 | C | A | -0.00845786 | 0.00153092 | 0.563601 | 3.30E-08 | 454724 |
| Arm fat percentage (left) | rs1801282 | 3 | 12393125 | G | C | 0.0229058 | 0.00233696 | 0.119545 | 1.10E-22 | 454724 |
| Arm fat percentage (left) | rs9843653 | 3 | 49920571 | C | T | 0.0169984 | 0.001521 | 0.511541 | 5.40E-29 | 454724 |
| Arm fat percentage (left) | rs7628689 | 3 | 88216647 | G | A | 0.0114129 | 0.00208862 | 0.843359 | 4.60E-08 | 454724 |
| Arm fat percentage (left) | rs1436348 | 3 | 104612668 | G | A | 0.0101006 | 0.00154125 | 0.582742 | 5.60E-11 | 454724 |
| Arm fat percentage (left) | rs9873289 | 3 | 114507733 | A | G | 0.0151778 | 0.00277546 | 0.917959 | 4.50E-08 | 454724 |
| Arm fat percentage (left) | rs2035936 | 3 | 141298124 | T | G | 0.026095 | 0.00335635 | 0.055875 | 7.60E-15 | 454724 |
| Arm fat percentage (left) | rs8192675 | 3 | 170724883 | C | T | 0.0124029 | 0.00167476 | 0.28866 | 1.30E-13 | 454724 |
| Arm fat percentage (left) | rs7612882 | 3 | 30078634 | A | G | 0.00836752 | 0.00152972 | 0.546453 | 4.50E-08 | 454724 |
| Arm fat percentage (left) | rs9843007 | 3 | 61207077 | T | A | -0.01049 | 0.00157103 | 0.373492 | 2.40E-11 | 454724 |
| Arm fat percentage (left) | rs12054057 | 3 | 44464535 | A | G | 0.0143311 | 0.00209166 | 0.157626 | 7.30E-12 | 454724 |
| Arm fat percentage (left) | rs7630228 | 3 | 71681487 | C | T | -0.0104019 | 0.00154177 | 0.434302 | 1.50E-11 | 454724 |
| Arm fat percentage (left) | rs9847672 | 3 | 131618541 | T | C | 0.0157894 | 0.00170164 | 0.276757 | 1.70E-20 | 454724 |
| Arm fat percentage (left) | rs6782581 | 3 | 196979106 | G | C | -0.00949242 | 0.0015315 | 0.439286 | 5.70E-10 | 454724 |
| Arm fat percentage (left) | rs3774063 | 3 | 9511736 | T | C | 0.0156864 | 0.00250923 | 0.102123 | 4.10E-10 | 454724 |
| Arm fat percentage (left) | rs13084418 | 3 | 25316314 | A | G | -0.0139191 | 0.00226171 | 0.129837 | 7.50E-10 | 454724 |
| Arm fat percentage (left) | rs9968060 | 3 | 62471282 | T | C | 0.0104043 | 0.0016153 | 0.642611 | 1.20E-10 | 454724 |
| Arm fat percentage (left) | rs13340130 | 3 | 81790970 | T | A | 0.00906216 | 0.00159869 | 0.345041 | 1.40E-08 | 454724 |
| Arm fat percentage (left) | rs79781120 | 3 | 101202993 | A | C | -0.0139419 | 0.00239904 | 0.113997 | 6.20E-09 | 454724 |
| Arm fat percentage (left) | rs1357079 | 3 | 153691949 | C | T | 0.011137 | 0.00153838 | 0.570066 | 4.50E-13 | 454724 |
| Arm fat percentage (left) | rs13317303 | 3 | 156302724 | A | C | -0.0153064 | 0.00212985 | 0.150182 | 6.60E-13 | 454724 |
| Arm fat percentage (left) | rs262956 | 3 | 183486117 | G | T | -0.0102704 | 0.00159469 | 0.646875 | 1.20E-10 | 454724 |
| Arm fat percentage (left) | rs4234589 | 3 | 185818882 | G | A | -0.0182348 | 0.00220923 | 0.13719 | 1.50E-16 | 454724 |
| Arm fat percentage (left) | rs2455818 | 3 | 15741009 | A | G | -0.00917109 | 0.00154739 | 0.597707 | 3.10E-09 | 454724 |
| Arm fat percentage (left) | rs12635343 | 3 | 82713229 | A | G | 0.0100059 | 0.00158162 | 0.361431 | 2.50E-10 | 454724 |
| Arm fat percentage (left) | rs3911063 | 3 | 85906928 | C | T | -0.0110089 | 0.00163005 | 0.321991 | 1.40E-11 | 454724 |
| Arm fat percentage (left) | rs1454687 | 3 | 94038085 | G | C | -0.0144904 | 0.00151994 | 0.515333 | 1.50E-21 | 454724 |
| Arm fat percentage (left) | rs9839081 | 3 | 123051230 | A | G | -0.0114425 | 0.00164842 | 0.325076 | 3.90E-12 | 454724 |
| Arm fat percentage (left) | rs1964675 | 3 | 136114945 | T | C | 0.0105482 | 0.00167921 | 0.711088 | 3.30E-10 | 454724 |
| Arm fat percentage (left) | rs6840236 | 4 | 56289785 | C | T | 0.00962404 | 0.00152613 | 0.464873 | 2.90E-10 | 454724 |
| Arm fat percentage (left) | rs7663885 | 4 | 83159728 | C | T | -0.00922852 | 0.00151846 | 0.500243 | 1.20E-09 | 454724 |
| Arm fat percentage (left) | rs1724557 | 4 | 137094048 | A | C | -0.011907 | 0.0015524 | 0.586758 | 1.70E-14 | 454724 |
| Arm fat percentage (left) | rs750090 | 4 | 152931436 | C | T | -0.00912285 | 0.00160466 | 0.356722 | 1.30E-08 | 454724 |
| Arm fat percentage (left) | rs16895838 | 4 | 17832418 | C | T | 0.0133732 | 0.0022747 | 0.12749 | 4.10E-09 | 454724 |
| Arm fat percentage (left) | rs73213501 | 4 | 28514830 | C | A | -0.0150625 | 0.00201656 | 0.171849 | 8.10E-14 | 454724 |
| Arm fat percentage (left) | rs3113509 | 4 | 52932825 | T | C | -0.00993318 | 0.00171804 | 0.731977 | 7.40E-09 | 454724 |
| Arm fat percentage (left) | rs7656367 | 4 | 89196821 | G | A | 0.00896065 | 0.00152302 | 0.488528 | 4.00E-09 | 454724 |
| Arm fat percentage (left) | rs1229984 | 4 | 100239319 | C | T | 0.0286209 | 0.00461468 | 0.972779 | 5.60E-10 | 454724 |
| Arm fat percentage (left) | rs13107325 | 4 | 103188709 | T | C | 0.0369248 | 0.00289172 | 0.07486 | 2.40E-37 | 454724 |
| Arm fat percentage (left) | rs2798297 | 4 | 3064004 | A | G | 0.00942015 | 0.00159011 | 0.366705 | 3.10E-09 | 454724 |
| Arm fat percentage (left) | rs2242189 | 4 | 38691024 | C | T | -0.00980095 | 0.00157852 | 0.381124 | 5.30E-10 | 454724 |
| Arm fat percentage (left) | rs2192527 | 4 | 18329824 | G | A | 0.0135324 | 0.00152581 | 0.465482 | 7.40E-19 | 454724 |
| Arm fat percentage (left) | rs7678322 | 4 | 34831143 | C | T | 0.00962082 | 0.00162172 | 0.329085 | 3.00E-09 | 454724 |
| Arm fat percentage (left) | rs1383723 | 4 | 67803507 | T | A | -0.0106374 | 0.00184993 | 0.783151 | 8.90E-09 | 454724 |
| Arm fat percentage (left) | rs7697886 | 4 | 89733023 | G | A | -0.0113636 | 0.00152275 | 0.470299 | 8.50E-14 | 454724 |
| Arm fat percentage (left) | rs57800857 | 4 | 140863365 | C | A | -0.0132501 | 0.00158877 | 0.364899 | 7.40E-17 | 454724 |
| Arm fat percentage (left) | rs10938398 | 4 | 45186139 | A | G | 0.0211619 | 0.00153761 | 0.433505 | 4.30E-43 | 454724 |
| Arm fat percentage (left) | rs2237025 | 4 | 55541879 | C | T | -0.00877923 | 0.00154246 | 0.555397 | 1.30E-08 | 454724 |
| Arm fat percentage (left) | rs6847975 | 4 | 80812960 | A | G | 0.0110402 | 0.00159462 | 0.356166 | 4.40E-12 | 454724 |
| Arm fat percentage (left) | rs4398538 | 4 | 130724740 | C | T | -0.0110904 | 0.00159027 | 0.642501 | 3.10E-12 | 454724 |
| Arm fat percentage (left) | rs10050620 | 5 | 63927239 | T | C | -0.0116255 | 0.00162492 | 0.325414 | 8.40E-13 | 454724 |
| Arm fat percentage (left) | rs2307111 | 5 | 75003678 | C | T | -0.0172199 | 0.00155662 | 0.395092 | 1.90E-28 | 454724 |
| Arm fat percentage (left) | rs252748 | 5 | 77390494 | T | C | -0.00875651 | 0.00155477 | 0.590945 | 1.80E-08 | 454724 |
| Arm fat percentage (left) | rs8180470 | 5 | 119388744 | T | C | -0.0107412 | 0.00153125 | 0.534853 | 2.30E-12 | 454724 |
| Arm fat percentage (left) | rs7730898 | 5 | 170459675 | A | G | 0.0146563 | 0.00171141 | 0.729117 | 1.10E-17 | 454724 |
| Arm fat percentage (left) | rs1991002 | 5 | 52848593 | G | T | -0.00929829 | 0.00152591 | 0.495156 | 1.10E-09 | 454724 |
| Arm fat percentage (left) | rs34483452 | 5 | 87986314 | A | C | 0.0249615 | 0.00223514 | 0.136308 | 5.90E-29 | 454724 |
| Arm fat percentage (left) | rs40071 | 5 | 107496102 | C | T | -0.0148201 | 0.0019876 | 0.179496 | 8.90E-14 | 454724 |
| Arm fat percentage (left) | rs13160735 | 5 | 144485978 | A | G | 0.0106401 | 0.00163465 | 0.322387 | 7.60E-11 | 454724 |
| Arm fat percentage (left) | rs1503526 | 5 | 63020706 | C | T | 0.0117572 | 0.00152204 | 0.479968 | 1.10E-14 | 454724 |
| Arm fat percentage (left) | rs2610245 | 5 | 63978255 | G | A | -0.00911323 | 0.00154772 | 0.517873 | 3.90E-09 | 454724 |
| Arm fat percentage (left) | rs34580448 | 5 | 82810884 | C | T | -0.0234802 | 0.0038313 | 0.041254 | 8.90E-10 | 454724 |
| Arm fat percentage (left) | rs6869862 | 5 | 103886213 | G | T | 0.00903123 | 0.0015223 | 0.480449 | 3.00E-09 | 454724 |
| Arm fat percentage (left) | rs13174863 | 5 | 139080745 | G | A | 0.0151808 | 0.0021572 | 0.148134 | 2.00E-12 | 454724 |
| Arm fat percentage (left) | rs890793 | 5 | 153573938 | T | C | 0.0091834 | 0.0015652 | 0.385663 | 4.40E-09 | 454724 |
| Arm fat percentage (left) | rs17820010 | 5 | 50384662 | G | T | 0.0105805 | 0.00166673 | 0.2956 | 2.20E-10 | 454724 |
| Arm fat percentage (left) | rs7442885 | 5 | 87682877 | G | C | -0.0122915 | 0.00185695 | 0.21412 | 3.60E-11 | 454724 |
| Arm fat percentage (left) | rs7704382 | 5 | 112448114 | G | C | 0.0105454 | 0.00153677 | 0.433421 | 6.80E-12 | 454724 |
| Arm fat percentage (left) | rs10070510 | 5 | 128014834 | C | T | -0.0138041 | 0.00250534 | 0.105229 | 3.60E-08 | 454724 |
| Arm fat percentage (left) | rs2962334 | 5 | 86879056 | T | G | 0.0325927 | 0.00541564 | 0.020069 | 1.80E-09 | 454724 |
| Arm fat percentage (left) | rs17055847 | 5 | 157983114 | C | T | 0.0130861 | 0.0016731 | 0.295445 | 5.20E-15 | 454724 |
| Arm fat percentage (left) | rs1322842 | 6 | 20488897 | G | A | -0.0111755 | 0.00156726 | 0.609479 | 1.00E-12 | 454724 |
| Arm fat percentage (left) | rs9446091 | 6 | 69785484 | C | T | -0.00984444 | 0.00174301 | 0.257406 | 1.60E-08 | 454724 |
| Arm fat percentage (left) | rs9372414 | 6 | 97764299 | T | C | -0.00954503 | 0.00160084 | 0.347613 | 2.50E-09 | 454724 |
| Arm fat percentage (left) | rs7755574 | 6 | 153364643 | T | G | 0.0109694 | 0.00169006 | 0.282689 | 8.60E-11 | 454724 |
| Arm fat percentage (left) | rs34338229 | 6 | 15370313 | A | G | 0.00967977 | 0.00162097 | 0.332002 | 2.30E-09 | 454724 |
| Arm fat percentage (left) | rs1046080 | 6 | 31595882 | A | C | 0.0162411 | 0.00169308 | 0.721641 | 8.60E-22 | 454724 |
| Arm fat percentage (left) | rs6903068 | 6 | 40354316 | T | G | -0.0102529 | 0.00172474 | 0.262802 | 2.80E-09 | 454724 |
| Arm fat percentage (left) | rs2499468 | 6 | 51809081 | A | C | 0.0113931 | 0.00159714 | 0.650994 | 9.80E-13 | 454724 |
| Arm fat percentage (left) | rs9480184 | 6 | 155987788 | T | C | 0.0103046 | 0.00186898 | 0.210757 | 3.50E-08 | 454724 |
| Arm fat percentage (left) | rs2569881 | 6 | 1620037 | A | G | -0.0137196 | 0.00228697 | 0.128664 | 2.00E-09 | 454724 |
| Arm fat percentage (left) | rs75499503 | 6 | 26145217 | T | C | -0.0181862 | 0.00186199 | 0.22013 | 1.60E-22 | 454724 |
| Arm fat percentage (left) | rs11967262 | 6 | 43760327 | G | C | -0.0118527 | 0.00152223 | 0.488654 | 6.90E-15 | 454724 |
| Arm fat percentage (left) | rs7761673 | 6 | 70357368 | A | T | -0.010308 | 0.0018398 | 0.219979 | 2.10E-08 | 454724 |
| Arm fat percentage (left) | rs4947124 | 6 | 111895728 | A | G | 0.0102471 | 0.00168016 | 0.709595 | 1.10E-09 | 454724 |
| Arm fat percentage (left) | rs2281819 | 6 | 33771673 | A | T | -0.0123712 | 0.00181019 | 0.229879 | 8.20E-12 | 454724 |
| Arm fat percentage (left) | rs62413414 | 6 | 80310375 | T | C | 0.0121845 | 0.00211683 | 0.151722 | 8.60E-09 | 454724 |
| Arm fat percentage (left) | rs6927268 | 6 | 108865663 | G | T | -0.012669 | 0.00188033 | 0.206318 | 1.60E-11 | 454724 |
| Arm fat percentage (left) | rs9491652 | 6 | 126943620 | C | G | -0.0127443 | 0.00152277 | 0.49621 | 5.80E-17 | 454724 |
| Arm fat percentage (left) | rs7341329 | 6 | 34729162 | G | A | 0.0186284 | 0.00161795 | 0.328076 | 1.10E-30 | 454724 |
| Arm fat percentage (left) | rs72892910 | 6 | 50816887 | T | G | 0.0249715 | 0.00201732 | 0.172213 | 3.40E-35 | 454724 |
| Arm fat percentage (left) | rs12206087 | 6 | 98582900 | A | G | -0.0145617 | 0.00152413 | 0.482449 | 1.20E-21 | 454724 |
| Arm fat percentage (left) | rs4307239 | 7 | 24354300 | G | A | 0.00873582 | 0.00153065 | 0.458849 | 1.10E-08 | 454724 |
| Arm fat percentage (left) | rs215638 | 7 | 32373541 | T | G | -0.010985 | 0.0015811 | 0.62754 | 3.70E-12 | 454724 |
| Arm fat percentage (left) | rs58862095 | 7 | 75081418 | T | C | -0.0148969 | 0.00154612 | 0.419267 | 5.70E-22 | 454724 |
| Arm fat percentage (left) | rs6977416 | 7 | 150542711 | A | G | -0.00896428 | 0.00162734 | 0.33425 | 3.60E-08 | 454724 |
| Arm fat percentage (left) | rs7796825 | 7 | 14317417 | A | G | 0.0116825 | 0.00201054 | 0.825768 | 6.20E-09 | 454724 |
| Arm fat percentage (left) | rs10269783 | 7 | 49616203 | A | G | 0.00859857 | 0.00156362 | 0.387852 | 3.80E-08 | 454724 |
| Arm fat percentage (left) | rs3901286 | 7 | 99107727 | A | C | -0.0156077 | 0.00212196 | 0.152426 | 1.90E-13 | 454724 |
| Arm fat percentage (left) | rs6963767 | 7 | 114402803 | A | G | 0.0125667 | 0.00190312 | 0.800046 | 4.00E-11 | 454724 |
| Arm fat percentage (left) | rs56226325 | 7 | 2078981 | T | C | -0.0150493 | 0.00209707 | 0.155789 | 7.20E-13 | 454724 |
| Arm fat percentage (left) | rs4549685 | 7 | 39326478 | T | C | -0.01277 | 0.00161962 | 0.329796 | 3.20E-15 | 454724 |
| Arm fat percentage (left) | rs11767811 | 7 | 71620988 | A | G | -0.0116151 | 0.00197283 | 0.181438 | 3.90E-09 | 454724 |
| Arm fat percentage (left) | rs12375196 | 7 | 103416541 | A | C | 0.0114177 | 0.00154916 | 0.424294 | 1.70E-13 | 454724 |
| Arm fat percentage (left) | rs73216116 | 7 | 122032774 | A | G | 0.00918086 | 0.00165869 | 0.318588 | 3.10E-08 | 454724 |
| Arm fat percentage (left) | rs4722398 | 7 | 3125220 | T | C | 0.0144685 | 0.0022144 | 0.13611 | 6.40E-11 | 454724 |
| Arm fat percentage (left) | rs9770544 | 7 | 27232126 | G | C | -0.0162412 | 0.00199988 | 0.820331 | 4.60E-16 | 454724 |
| Arm fat percentage (left) | rs1852006 | 7 | 77829768 | A | G | -0.0106449 | 0.00158794 | 0.356957 | 2.00E-11 | 454724 |
| Arm fat percentage (left) | rs42523 | 7 | 94040999 | C | T | 0.00969216 | 0.00177201 | 0.245211 | 4.50E-08 | 454724 |
| Arm fat percentage (left) | rs9641499 | 7 | 112984493 | A | C | -0.0136991 | 0.00153493 | 0.434712 | 4.50E-19 | 454724 |
| Arm fat percentage (left) | rs10280907 | 7 | 44534790 | T | G | 0.010758 | 0.00194369 | 0.189668 | 3.10E-08 | 454724 |
| Arm fat percentage (left) | rs972283 | 7 | 130466854 | G | A | -0.0118013 | 0.00152077 | 0.511934 | 8.50E-15 | 454724 |
| Arm fat percentage (left) | rs117176448 | 8 | 27261138 | G | C | 0.0157671 | 0.00257952 | 0.096163 | 9.80E-10 | 454724 |
| Arm fat percentage (left) | rs4737188 | 8 | 64756657 | T | A | -0.00850912 | 0.00152623 | 0.473839 | 2.50E-08 | 454724 |
| Arm fat percentage (left) | rs2466103 | 8 | 32412304 | G | T | 0.0104286 | 0.00165403 | 0.303562 | 2.90E-10 | 454724 |
| Arm fat percentage (left) | rs10100245 | 8 | 77226919 | A | G | 0.016792 | 0.0015367 | 0.564469 | 8.50E-28 | 454724 |
| Arm fat percentage (left) | rs7463186 | 8 | 87517201 | G | A | 0.00842667 | 0.00152234 | 0.516028 | 3.10E-08 | 454724 |
| Arm fat percentage (left) | rs2737263 | 8 | 116667539 | T | G | -0.017384 | 0.00169518 | 0.280559 | 1.10E-24 | 454724 |
| Arm fat percentage (left) | rs10099330 | 8 | 143383694 | G | A | 0.00882541 | 0.00153101 | 0.452932 | 8.20E-09 | 454724 |
| Arm fat percentage (left) | rs1559900 | 8 | 14207321 | T | C | 0.0105958 | 0.00168375 | 0.28612 | 3.10E-10 | 454724 |
| Arm fat percentage (left) | rs1421334 | 8 | 30865733 | C | A | -0.0105763 | 0.00153744 | 0.548851 | 6.00E-12 | 454724 |
| Arm fat percentage (left) | rs2980237 | 8 | 76315205 | T | G | 0.0110547 | 0.00176509 | 0.751224 | 3.80E-10 | 454724 |
| Arm fat percentage (left) | rs1808629 | 8 | 73435964 | A | G | -0.0147576 | 0.00164579 | 0.685432 | 3.00E-19 | 454724 |
| Arm fat percentage (left) | rs4311684 | 8 | 112395164 | C | T | 0.0107777 | 0.0016729 | 0.706694 | 1.20E-10 | 454724 |
| Arm fat percentage (left) | rs2954021 | 8 | 126482077 | G | A | 0.0117081 | 0.0015222 | 0.504589 | 1.50E-14 | 454724 |
| Arm fat percentage (left) | rs11782074 | 8 | 142617096 | T | G | 0.00975079 | 0.00159084 | 0.383631 | 8.80E-10 | 454724 |
| Arm fat percentage (left) | rs7824675 | 8 | 10243418 | A | C | -0.0113917 | 0.00152919 | 0.519413 | 9.40E-14 | 454724 |
| Arm fat percentage (left) | rs11786089 | 8 | 21975521 | G | A | 0.0102596 | 0.00153022 | 0.459693 | 2.00E-11 | 454724 |
| Arm fat percentage (left) | rs4466418 | 8 | 126323787 | A | G | 0.00874963 | 0.00153661 | 0.56225 | 1.20E-08 | 454724 |
| Arm fat percentage (left) | rs13292699 | 9 | 15910044 | C | A | -0.0188416 | 0.00153837 | 0.433717 | 1.70E-34 | 454724 |
| Arm fat percentage (left) | rs10756792 | 9 | 16726119 | T | C | -0.015703 | 0.0017495 | 0.743073 | 2.80E-19 | 454724 |
| Arm fat percentage (left) | rs7027304 | 9 | 129408290 | T | C | 0.0121845 | 0.00160627 | 0.652641 | 3.30E-14 | 454724 |
| Arm fat percentage (left) | rs215498 | 9 | 14440739 | T | G | 0.00955001 | 0.00163597 | 0.324133 | 5.30E-09 | 454724 |
| Arm fat percentage (left) | rs7034554 | 9 | 37081301 | G | A | -0.00965599 | 0.00157198 | 0.373725 | 8.10E-10 | 454724 |
| Arm fat percentage (left) | rs725959 | 9 | 81349608 | T | G | -0.00886742 | 0.00155347 | 0.412477 | 1.10E-08 | 454724 |
| Arm fat percentage (left) | rs687621 | 9 | 136137065 | G | A | 0.01142 | 0.00163219 | 0.320097 | 2.60E-12 | 454724 |
| Arm fat percentage (left) | rs55924785 | 9 | 136929586 | T | C | -0.012418 | 0.0020526 | 0.164683 | 1.40E-09 | 454724 |
| Arm fat percentage (left) | rs7357754 | 9 | 92207308 | G | A | 0.0113996 | 0.00152682 | 0.500121 | 8.30E-14 | 454724 |
| Arm fat percentage (left) | rs4837119 | 9 | 129672095 | A | T | -0.0124247 | 0.00152727 | 0.517251 | 4.10E-16 | 454724 |
| Arm fat percentage (left) | rs34882821 | 9 | 14783314 | T | G | 0.00934946 | 0.00161338 | 0.338504 | 6.80E-09 | 454724 |
| Arm fat percentage (left) | rs10116857 | 9 | 16595649 | A | C | -0.0223594 | 0.00316473 | 0.061827 | 1.60E-12 | 454724 |
| Arm fat percentage (left) | rs17770336 | 9 | 28414625 | T | C | 0.0167569 | 0.00162515 | 0.322443 | 6.30E-25 | 454724 |
| Arm fat percentage (left) | rs12376870 | 9 | 117890567 | A | G | -0.0114619 | 0.00179345 | 0.237674 | 1.60E-10 | 454724 |
| Arm fat percentage (left) | rs2182634 | 9 | 3962738 | G | C | 0.0115812 | 0.00207319 | 0.164045 | 2.30E-08 | 454724 |
| Arm fat percentage (left) | rs16916303 | 9 | 30823761 | G | A | -0.0133138 | 0.00236995 | 0.119778 | 1.90E-08 | 454724 |
| Arm fat percentage (left) | rs12001437 | 9 | 34074476 | C | T | 0.00929209 | 0.00157835 | 0.367765 | 3.90E-09 | 454724 |
| Arm fat percentage (left) | rs10760724 | 9 | 103085144 | C | T | 0.010682 | 0.00152305 | 0.477318 | 2.30E-12 | 454724 |
| Arm fat percentage (left) | rs12338803 | 9 | 116025428 | C | A | 0.0101545 | 0.00170678 | 0.274778 | 2.70E-09 | 454724 |
| Arm fat percentage (left) | rs522110 | 10 | 99772885 | G | A | 0.0141373 | 0.00153256 | 0.555026 | 2.80E-20 | 454724 |
| Arm fat percentage (left) | rs34045894 | 10 | 33967489 | A | G | 0.0123589 | 0.00209787 | 0.156083 | 3.80E-09 | 454724 |
| Arm fat percentage (left) | rs7070670 | 10 | 61842645 | T | C | -0.00913103 | 0.00163151 | 0.327988 | 2.20E-08 | 454724 |
| Arm fat percentage (left) | rs946185 | 10 | 76423739 | G | A | -0.0103912 | 0.00156055 | 0.594807 | 2.80E-11 | 454724 |
| Arm fat percentage (left) | rs4933220 | 10 | 93556497 | A | G | -0.00865272 | 0.00154016 | 0.425122 | 1.90E-08 | 454724 |
| Arm fat percentage (left) | rs10999460 | 10 | 72428283 | T | C | 0.0125838 | 0.0017317 | 0.265498 | 3.70E-13 | 454724 |
| Arm fat percentage (left) | rs10788497 | 10 | 88127995 | C | G | 0.0102466 | 0.00152482 | 0.499613 | 1.80E-11 | 454724 |
| Arm fat percentage (left) | rs61871615 | 10 | 102487140 | T | C | -0.0204532 | 0.00276646 | 0.091506 | 1.40E-13 | 454724 |
| Arm fat percentage (left) | rs36090025 | 10 | 114774433 | C | A | -0.00962955 | 0.00166199 | 0.299697 | 6.90E-09 | 454724 |
| Arm fat percentage (left) | rs67609008 | 10 | 126640936 | C | T | 0.0116886 | 0.00169538 | 0.283591 | 5.40E-12 | 454724 |
| Arm fat percentage (left) | rs2172131 | 10 | 133978962 | C | T | -0.0111735 | 0.0015428 | 0.578562 | 4.40E-13 | 454724 |
| Arm fat percentage (left) | rs7893571 | 10 | 16750129 | T | G | 0.00997477 | 0.0016179 | 0.665926 | 7.00E-10 | 454724 |
| Arm fat percentage (left) | rs11012732 | 10 | 21830104 | G | A | 0.0144403 | 0.00161756 | 0.331706 | 4.40E-19 | 454724 |
| Arm fat percentage (left) | rs10886022 | 10 | 118778079 | C | A | -0.0124009 | 0.00182694 | 0.763356 | 1.10E-11 | 454724 |
| Arm fat percentage (left) | rs11017772 | 10 | 132954247 | T | C | -0.0110707 | 0.00188723 | 0.205913 | 4.50E-09 | 454724 |
| Arm fat percentage (left) | rs67257872 | 11 | 8530218 | G | A | -0.0130569 | 0.00153062 | 0.446712 | 1.50E-17 | 454724 |
| Arm fat percentage (left) | rs11030016 | 11 | 27487992 | T | C | 0.0130365 | 0.00173835 | 0.739769 | 6.40E-14 | 454724 |
| Arm fat percentage (left) | rs35023999 | 11 | 113266411 | C | A | -0.00964293 | 0.00152299 | 0.508301 | 2.40E-10 | 454724 |
| Arm fat percentage (left) | rs12282785 | 11 | 76476030 | A | C | -0.0109944 | 0.00186982 | 0.215759 | 4.10E-09 | 454724 |
| Arm fat percentage (left) | rs2930575 | 11 | 85058944 | C | T | 0.0122762 | 0.00223054 | 0.864958 | 3.70E-08 | 454724 |
| Arm fat percentage (left) | rs10892501 | 11 | 119818622 | A | G | -0.00951763 | 0.00157026 | 0.607115 | 1.40E-09 | 454724 |
| Arm fat percentage (left) | rs12788343 | 11 | 131452912 | C | T | 0.0114589 | 0.00154627 | 0.409213 | 1.30E-13 | 454724 |
| Arm fat percentage (left) | rs1013402 | 11 | 27712381 | G | A | 0.0205712 | 0.00163157 | 0.318442 | 1.90E-36 | 454724 |
| Arm fat percentage (left) | rs9783304 | 11 | 43660255 | T | G | -0.016753 | 0.00164535 | 0.689281 | 2.40E-24 | 454724 |
| Arm fat percentage (left) | rs801738 | 11 | 65924217 | G | C | -0.011473 | 0.001588 | 0.357526 | 5.00E-13 | 454724 |
| Arm fat percentage (left) | rs4930387 | 11 | 66449905 | G | A | 0.00952105 | 0.00152602 | 0.531141 | 4.40E-10 | 454724 |
| Arm fat percentage (left) | rs61903695 | 11 | 89922417 | G | A | 0.0120354 | 0.00174877 | 0.2549 | 5.90E-12 | 454724 |
| Arm fat percentage (left) | rs654718 | 11 | 94190115 | C | T | -0.0100495 | 0.00162231 | 0.32786 | 5.80E-10 | 454724 |
| Arm fat percentage (left) | rs11223970 | 11 | 134600370 | G | A | 0.0127845 | 0.00205566 | 0.164579 | 5.00E-10 | 454724 |
| Arm fat percentage (left) | rs6597975 | 11 | 838842 | G | C | 0.00852924 | 0.00153597 | 0.543875 | 2.80E-08 | 454724 |
| Arm fat percentage (left) | rs34796300 | 11 | 13315205 | C | T | 0.0121294 | 0.00153751 | 0.570551 | 3.00E-15 | 454724 |
| Arm fat percentage (left) | rs1782508 | 11 | 30243795 | G | C | -0.00889517 | 0.00159941 | 0.655509 | 2.70E-08 | 454724 |
| Arm fat percentage (left) | rs55707359 | 11 | 46159333 | G | T | 0.0367288 | 0.00625173 | 0.015445 | 4.20E-09 | 454724 |
| Arm fat percentage (left) | rs7124681 | 11 | 47529947 | A | C | 0.0244832 | 0.00154469 | 0.408395 | 1.40E-56 | 454724 |
| Arm fat percentage (left) | rs11215381 | 11 | 115022233 | C | T | 0.00844505 | 0.00152644 | 0.525804 | 3.20E-08 | 454724 |
| Arm fat percentage (left) | rs11222371 | 11 | 130745719 | T | C | 0.0125038 | 0.00154842 | 0.409212 | 6.70E-16 | 454724 |
| Arm fat percentage (left) | rs723672 | 12 | 2161561 | T | C | 0.00997263 | 0.00154476 | 0.431522 | 1.10E-10 | 454724 |
| Arm fat percentage (left) | rs704061 | 12 | 89771903 | C | T | 0.0132493 | 0.00152829 | 0.455052 | 4.30E-18 | 454724 |
| Arm fat percentage (left) | rs75412871 | 12 | 121709430 | T | C | -0.0213344 | 0.00343397 | 0.051929 | 5.20E-10 | 454724 |
| Arm fat percentage (left) | rs12367809 | 12 | 50256063 | T | C | 0.0218128 | 0.00158294 | 0.369193 | 3.40E-43 | 454724 |
| Arm fat percentage (left) | rs10783779 | 12 | 56491880 | G | T | -0.00872902 | 0.00155424 | 0.402968 | 2.00E-08 | 454724 |
| Arm fat percentage (left) | rs7133378 | 12 | 124409502 | A | G | 0.0181924 | 0.00163517 | 0.319424 | 9.40E-29 | 454724 |
| Arm fat percentage (left) | rs4762951 | 12 | 20543307 | G | A | -0.0111126 | 0.00183946 | 0.780431 | 1.50E-09 | 454724 |
| Arm fat percentage (left) | rs11172106 | 12 | 57512875 | G | C | 0.00862449 | 0.00153333 | 0.451611 | 1.90E-08 | 454724 |
| Arm fat percentage (left) | rs11173522 | 12 | 60953472 | A | C | 0.0112539 | 0.00185601 | 0.21428 | 1.30E-09 | 454724 |
| Arm fat percentage (left) | rs11105842 | 12 | 91243910 | A | G | -0.0104761 | 0.0015861 | 0.367522 | 4.00E-11 | 454724 |
| Arm fat percentage (left) | rs55726687 | 12 | 991306 | A | G | 0.0143113 | 0.0018674 | 0.209739 | 1.80E-14 | 454724 |
| Arm fat percentage (left) | rs3764002 | 12 | 108618630 | T | C | -0.0145944 | 0.00173119 | 0.261503 | 3.40E-17 | 454724 |
| Arm fat percentage (left) | rs12422552 | 12 | 14413931 | C | G | -0.00941263 | 0.00172401 | 0.268302 | 4.80E-08 | 454724 |
| Arm fat percentage (left) | rs147819910 | 12 | 39996098 | T | G | 0.0328444 | 0.0056924 | 0.018205 | 7.90E-09 | 454724 |
| Arm fat percentage (left) | rs2111281 | 12 | 108165360 | C | A | 0.0100307 | 0.00158027 | 0.366931 | 2.20E-10 | 454724 |
| Arm fat percentage (left) | rs78296744 | 12 | 122479308 | A | G | -0.0126204 | 0.00171223 | 0.272341 | 1.70E-13 | 454724 |
| Arm fat percentage (left) | rs10998 | 12 | 122989412 | A | G | 0.0165592 | 0.00175144 | 0.746786 | 3.20E-21 | 454724 |
| Arm fat percentage (left) | rs1023229 | 13 | 20270925 | A | G | -0.0119919 | 0.00215713 | 0.853909 | 2.70E-08 | 454724 |
| Arm fat percentage (left) | rs9579775 | 13 | 20616557 | C | A | 0.0176133 | 0.0023143 | 0.135547 | 2.70E-14 | 454724 |
| Arm fat percentage (left) | rs17446299 | 13 | 40762556 | G | C | 0.0119971 | 0.00205127 | 0.165545 | 5.00E-09 | 454724 |
| Arm fat percentage (left) | rs4055791 | 13 | 59266053 | T | C | -0.0110359 | 0.00154597 | 0.416764 | 9.40E-13 | 454724 |
| Arm fat percentage (left) | rs6491427 | 13 | 99113166 | G | A | -0.0126651 | 0.00167989 | 0.288993 | 4.70E-14 | 454724 |
| Arm fat percentage (left) | rs56858768 | 13 | 86511730 | A | G | 0.0121639 | 0.00167325 | 0.296903 | 3.60E-13 | 454724 |
| Arm fat percentage (left) | rs9568867 | 13 | 54107352 | A | G | 0.0204518 | 0.00228928 | 0.129179 | 4.10E-19 | 454724 |
| Arm fat percentage (left) | rs9515455 | 13 | 112239671 | A | G | 0.0101356 | 0.00155491 | 0.414832 | 7.10E-11 | 454724 |
| Arm fat percentage (left) | rs7321331 | 13 | 31015138 | A | G | 0.00990806 | 0.00175075 | 0.742308 | 1.50E-08 | 454724 |
| Arm fat percentage (left) | rs56399737 | 13 | 33381721 | T | C | -0.012477 | 0.00153671 | 0.449166 | 4.70E-16 | 454724 |
| Arm fat percentage (left) | rs9522183 | 13 | 111977280 | T | G | -0.0106643 | 0.00154542 | 0.56175 | 5.20E-12 | 454724 |
| Arm fat percentage (left) | rs1441264 | 13 | 79580919 | A | G | 0.0132514 | 0.00158442 | 0.59369 | 6.10E-17 | 454724 |
| Arm fat percentage (left) | rs1451963 | 14 | 41350367 | T | G | 0.0171034 | 0.00277565 | 0.082254 | 7.20E-10 | 454724 |
| Arm fat percentage (left) | rs12881869 | 14 | 50923249 | T | C | 0.0173623 | 0.00297767 | 0.070527 | 5.50E-09 | 454724 |
| Arm fat percentage (left) | rs3803286 | 14 | 103246470 | G | A | -0.0112441 | 0.00161536 | 0.666751 | 3.40E-12 | 454724 |
| Arm fat percentage (left) | rs9788550 | 14 | 29681138 | C | G | -0.0160583 | 0.001772 | 0.247498 | 1.30E-19 | 454724 |
| Arm fat percentage (left) | rs12883788 | 14 | 33303540 | T | C | 0.0130739 | 0.00153412 | 0.459755 | 1.60E-17 | 454724 |
| Arm fat percentage (left) | rs217672 | 14 | 62361021 | C | A | 0.0123193 | 0.00171679 | 0.271726 | 7.20E-13 | 454724 |
| Arm fat percentage (left) | rs4430672 | 14 | 63094407 | C | T | -0.0106017 | 0.00191122 | 0.800935 | 2.90E-08 | 454724 |
| Arm fat percentage (left) | rs2370982 | 14 | 79890677 | T | C | 0.0193387 | 0.00187056 | 0.214158 | 4.70E-25 | 454724 |
| Arm fat percentage (left) | rs6575340 | 14 | 94023972 | A | G | 0.013974 | 0.00158722 | 0.636028 | 1.30E-18 | 454724 |
| Arm fat percentage (left) | rs12890931 | 14 | 69753369 | G | T | 0.0099162 | 0.00159454 | 0.362434 | 5.00E-10 | 454724 |
| Arm fat percentage (left) | rs8008772 | 14 | 88321884 | T | A | 0.0100257 | 0.00176563 | 0.25047 | 1.40E-08 | 454724 |
| Arm fat percentage (left) | rs12885458 | 14 | 47303114 | G | T | -0.0102054 | 0.00152574 | 0.507979 | 2.20E-11 | 454724 |
| Arm fat percentage (left) | rs2765041 | 14 | 103991478 | A | T | -0.0114205 | 0.00167903 | 0.710451 | 1.00E-11 | 454724 |
| Arm fat percentage (left) | rs4776985 | 15 | 68123021 | G | T | -0.0215162 | 0.00182121 | 0.224995 | 3.30E-32 | 454724 |
| Arm fat percentage (left) | rs11852419 | 15 | 41456374 | T | A | 0.0104615 | 0.00173398 | 0.261665 | 1.60E-09 | 454724 |
| Arm fat percentage (left) | rs1912638 | 15 | 47973744 | C | G | -0.00977216 | 0.0016198 | 0.341483 | 1.60E-09 | 454724 |
| Arm fat percentage (left) | rs28734088 | 15 | 58957827 | T | C | 0.0149805 | 0.00230568 | 0.125778 | 8.20E-11 | 454724 |
| Arm fat percentage (left) | rs56803094 | 15 | 99222509 | G | A | -0.010754 | 0.00182616 | 0.226679 | 3.90E-09 | 454724 |
| Arm fat percentage (left) | rs80243702 | 15 | 53163603 | A | G | 0.0132881 | 0.00208985 | 0.16068 | 2.00E-10 | 454724 |
| Arm fat percentage (left) | rs7171864 | 15 | 73227249 | A | G | 0.0130459 | 0.00161599 | 0.660085 | 6.90E-16 | 454724 |
| Arm fat percentage (left) | rs72744924 | 15 | 56876088 | G | A | 0.0156893 | 0.00269488 | 0.089261 | 5.80E-09 | 454724 |
| Arm fat percentage (left) | rs34994596 | 15 | 80991447 | C | T | -0.0107346 | 0.00166658 | 0.297375 | 1.20E-10 | 454724 |
| Arm fat percentage (left) | rs8031704 | 15 | 84651185 | A | C | 0.0124192 | 0.0016258 | 0.327605 | 2.20E-14 | 454724 |
| Arm fat percentage (left) | rs12441543 | 15 | 31689543 | A | G | 0.0104659 | 0.00168724 | 0.28711 | 5.50E-10 | 454724 |
| Arm fat percentage (left) | rs979259 | 15 | 51959430 | G | A | -0.0108199 | 0.00154854 | 0.58262 | 2.80E-12 | 454724 |
| Arm fat percentage (left) | rs7498044 | 15 | 92573639 | A | G | -0.0123922 | 0.00186602 | 0.217388 | 3.10E-11 | 454724 |
| Arm fat percentage (left) | rs7187776 | 16 | 28857645 | G | A | 0.0243354 | 0.00155158 | 0.401997 | 1.90E-55 | 454724 |
| Arm fat percentage (left) | rs3751859 | 16 | 81735012 | A | G | -0.0132885 | 0.00209485 | 0.156472 | 2.20E-10 | 454724 |
| Arm fat percentage (left) | rs879620 | 16 | 4015729 | T | C | 0.0160153 | 0.00156782 | 0.613269 | 1.70E-24 | 454724 |
| Arm fat percentage (left) | rs2058527 | 16 | 6704749 | G | T | 0.0104521 | 0.00171656 | 0.730592 | 1.10E-09 | 454724 |
| Arm fat percentage (left) | rs11648621 | 16 | 19973008 | G | A | -0.0106967 | 0.00186088 | 0.214847 | 9.00E-09 | 454724 |
| Arm fat percentage (left) | rs56369689 | 16 | 30120308 | G | A | -0.012077 | 0.00163448 | 0.34861 | 1.50E-13 | 454724 |
| Arm fat percentage (left) | rs34898535 | 16 | 31025641 | T | C | -0.0157119 | 0.00157078 | 0.377909 | 1.50E-23 | 454724 |
| Arm fat percentage (left) | rs11866219 | 16 | 69549749 | C | A | -0.0193718 | 0.00156441 | 0.583791 | 3.20E-35 | 454724 |
| Arm fat percentage (left) | rs811054 | 16 | 72251132 | T | C | 0.0108333 | 0.0015367 | 0.537257 | 1.80E-12 | 454724 |
| Arm fat percentage (left) | rs35949039 | 16 | 70572605 | T | G | -0.0153871 | 0.0024967 | 0.105572 | 7.10E-10 | 454724 |
| Arm fat percentage (left) | rs56094641 | 16 | 53806453 | G | A | 0.0464737 | 0.00155086 | 0.40465 | 2.70E-197 | 454724 |
| Arm fat percentage (left) | rs4887872 | 16 | 76735249 | C | T | 0.0110497 | 0.00192971 | 0.19458 | 1.00E-08 | 454724 |
| Arm fat percentage (left) | rs3114914 | 16 | 89368030 | T | C | -0.00981322 | 0.00176315 | 0.743244 | 2.60E-08 | 454724 |
| Arm fat percentage (left) | rs7201895 | 16 | 407723 | A | G | -0.0107282 | 0.00160169 | 0.354221 | 2.10E-11 | 454724 |
| Arm fat percentage (left) | rs1038088 | 17 | 28074563 | G | T | 0.0120221 | 0.0015223 | 0.519316 | 2.80E-15 | 454724 |
| Arm fat percentage (left) | rs4793085 | 17 | 42320732 | C | A | -0.0126911 | 0.00161092 | 0.656341 | 3.30E-15 | 454724 |
| Arm fat percentage (left) | rs11150745 | 17 | 78757626 | G | A | -0.0132422 | 0.00163907 | 0.317686 | 6.50E-16 | 454724 |
| Arm fat percentage (left) | rs3826408 | 17 | 7101292 | T | C | 0.00956246 | 0.00152841 | 0.456867 | 3.90E-10 | 454724 |
| Arm fat percentage (left) | rs17698176 | 17 | 44819595 | G | T | 0.0101802 | 0.0018368 | 0.226628 | 3.00E-08 | 454724 |
| Arm fat percentage (left) | rs8076669 | 17 | 15888448 | C | T | 0.0090491 | 0.00153652 | 0.561566 | 3.90E-09 | 454724 |
| Arm fat percentage (left) | rs7218014 | 17 | 65832016 | C | T | 0.0180363 | 0.00191806 | 0.197305 | 5.30E-21 | 454724 |
| Arm fat percentage (left) | rs11078687 | 17 | 7421672 | A | G | 0.01104 | 0.00156623 | 0.613595 | 1.80E-12 | 454724 |
| Arm fat percentage (left) | rs4790841 | 17 | 1835482 | T | C | -0.0202147 | 0.00211665 | 0.154513 | 1.30E-21 | 454724 |
| Arm fat percentage (left) | rs1320251 | 17 | 21264396 | T | C | -0.0104228 | 0.00153479 | 0.454747 | 1.10E-11 | 454724 |
| Arm fat percentage (left) | rs319788 | 17 | 31531617 | T | C | 0.00934408 | 0.00165488 | 0.696263 | 1.60E-08 | 454724 |
| Arm fat percentage (left) | rs11079849 | 17 | 47090785 | T | C | -0.0156965 | 0.00162538 | 0.328546 | 4.60E-22 | 454724 |
| Arm fat percentage (left) | rs13030 | 17 | 61908556 | T | C | 0.0089725 | 0.00162144 | 0.327792 | 3.10E-08 | 454724 |
| Arm fat percentage (left) | rs2034946 | 17 | 73863589 | G | T | 0.0121868 | 0.00187678 | 0.20882 | 8.40E-11 | 454724 |
| Arm fat percentage (left) | rs6567160 | 18 | 57829135 | C | T | 0.0295724 | 0.00180298 | 0.23266 | 1.90E-60 | 454724 |
| Arm fat percentage (left) | rs1788808 | 18 | 21090023 | G | A | -0.0144077 | 0.00152636 | 0.494876 | 3.80E-21 | 454724 |
| Arm fat percentage (left) | rs2052607 | 18 | 40788387 | A | G | -0.013924 | 0.00160842 | 0.343898 | 4.80E-18 | 454724 |
| Arm fat percentage (left) | rs1103804 | 18 | 46636411 | G | A | -0.010778 | 0.00180295 | 0.766885 | 2.30E-09 | 454724 |
| Arm fat percentage (left) | rs9955276 | 18 | 1839339 | T | C | 0.0144121 | 0.00217818 | 0.144433 | 3.70E-11 | 454724 |
| Arm fat percentage (left) | rs2289687 | 18 | 2847730 | G | C | -0.00937982 | 0.00161519 | 0.442894 | 6.30E-09 | 454724 |
| Arm fat percentage (left) | rs8090017 | 18 | 39911991 | A | G | 0.0108336 | 0.00162285 | 0.334467 | 2.50E-11 | 454724 |
| Arm fat percentage (left) | rs1945160 | 18 | 22164216 | A | G | -0.00870874 | 0.00157955 | 0.375862 | 3.50E-08 | 454724 |
| Arm fat percentage (left) | rs11664848 | 18 | 42575661 | G | C | 0.0108278 | 0.00161457 | 0.659624 | 2.00E-11 | 454724 |
| Arm fat percentage (left) | rs57636386 | 18 | 58048295 | C | T | -0.0278282 | 0.00275778 | 0.083839 | 6.10E-24 | 454724 |
| Arm fat percentage (left) | rs8096658 | 18 | 77156537 | G | C | -0.00849388 | 0.00154289 | 0.487503 | 3.70E-08 | 454724 |
| Arm fat percentage (left) | rs10513935 | 18 | 1660497 | A | G | -0.00958352 | 0.00166255 | 0.301529 | 8.20E-09 | 454724 |
| Arm fat percentage (left) | rs11659979 | 18 | 13157049 | A | G | 0.0103215 | 0.00173322 | 0.26175 | 2.60E-09 | 454724 |
| Arm fat percentage (left) | rs9304665 | 19 | 47602577 | A | T | 0.0131545 | 0.00179767 | 0.76364 | 2.50E-13 | 454724 |
| Arm fat percentage (left) | rs11667638 | 19 | 1841501 | G | A | 0.00874098 | 0.00152715 | 0.52853 | 1.00E-08 | 454724 |
| Arm fat percentage (left) | rs55714539 | 19 | 18207397 | C | A | 0.0157155 | 0.00161661 | 0.343601 | 2.40E-22 | 454724 |
| Arm fat percentage (left) | rs8112818 | 19 | 18812785 | G | A | -0.0142304 | 0.00155986 | 0.40037 | 7.30E-20 | 454724 |
| Arm fat percentage (left) | rs34331990 | 19 | 30321561 | G | T | 0.0105643 | 0.00155302 | 0.418756 | 1.00E-11 | 454724 |
| Arm fat percentage (left) | rs429358 | 19 | 45411941 | C | T | -0.0188481 | 0.00211229 | 0.154041 | 4.50E-19 | 454724 |
| Arm fat percentage (left) | rs10402950 | 19 | 33935675 | C | T | 0.0161131 | 0.00168315 | 0.28935 | 1.00E-21 | 454724 |
| Arm fat percentage (left) | rs56356382 | 19 | 4064057 | C | T | -0.0169593 | 0.0019412 | 0.192335 | 2.40E-18 | 454724 |
| Arm fat percentage (left) | rs7246182 | 19 | 5147735 | C | T | -0.0110787 | 0.00183618 | 0.222966 | 1.60E-09 | 454724 |
| Arm fat percentage (left) | rs12459368 | 19 | 18459377 | G | A | -0.013616 | 0.00171802 | 0.268188 | 2.30E-15 | 454724 |
| Arm fat percentage (left) | rs10423928 | 19 | 46182304 | A | T | -0.0225049 | 0.00192264 | 0.194424 | 1.20E-31 | 454724 |
| Arm fat percentage (left) | rs6138536 | 20 | 25182648 | G | A | 0.0110794 | 0.00152903 | 0.462452 | 4.30E-13 | 454724 |
| Arm fat percentage (left) | rs56218501 | 20 | 46365636 | T | C | -0.0114937 | 0.00186378 | 0.211817 | 7.00E-10 | 454724 |
| Arm fat percentage (left) | rs112852122 | 20 | 47498117 | A | G | -0.0175006 | 0.00212298 | 0.157855 | 1.70E-16 | 454724 |
| Arm fat percentage (left) | rs6021948 | 20 | 51100420 | A | T | -0.0120032 | 0.00163467 | 0.321773 | 2.10E-13 | 454724 |
| Arm fat percentage (left) | rs11699828 | 20 | 62157198 | A | G | -0.0271623 | 0.0044843 | 0.035832 | 1.40E-09 | 454724 |
| Arm fat percentage (left) | rs6054427 | 20 | 6635266 | A | G | 0.0137177 | 0.00157689 | 0.620812 | 3.30E-18 | 454724 |
| Arm fat percentage (left) | rs8118253 | 20 | 15819926 | A | T | 0.0126368 | 0.00225956 | 0.131607 | 2.20E-08 | 454724 |
| Arm fat percentage (left) | rs6103254 | 20 | 41990761 | C | T | -0.0142295 | 0.00229909 | 0.126698 | 6.00E-10 | 454724 |
| Arm fat percentage (left) | rs6023655 | 20 | 53479658 | G | A | -0.0102372 | 0.00180862 | 0.765801 | 1.50E-08 | 454724 |
| Arm fat percentage (left) | rs6044084 | 20 | 16516264 | G | A | 0.00879161 | 0.00155138 | 0.586907 | 1.50E-08 | 454724 |
| Arm fat percentage (left) | rs394608 | 21 | 46581798 | C | T | 0.0129019 | 0.00153496 | 0.537727 | 4.30E-17 | 454724 |
| Arm fat percentage (left) | rs62218301 | 21 | 36741262 | G | A | -0.0116896 | 0.00206017 | 0.166065 | 1.40E-08 | 454724 |
| Arm fat percentage (left) | rs17193211 | 21 | 38885506 | T | C | -0.0175561 | 0.00310548 | 0.066797 | 1.60E-08 | 454724 |
| Arm fat percentage (left) | rs8132491 | 21 | 40288577 | A | G | -0.00986925 | 0.00168786 | 0.312991 | 5.00E-09 | 454724 |
| Arm fat percentage (left) | rs8126575 | 21 | 46435610 | G | T | -0.0122891 | 0.00224891 | 0.139301 | 4.60E-08 | 454724 |
| Arm fat percentage (left) | rs10854853 | 22 | 48874412 | T | G | 0.00952314 | 0.00153106 | 0.456805 | 5.00E-10 | 454724 |
| Arm fat percentage (left) | rs4820323 | 22 | 38599767 | G | C | -0.0137802 | 0.00154866 | 0.580953 | 5.70E-19 | 454724 |
| Arm fat percentage (left) | rs12628603 | 22 | 38119213 | A | G | -0.00982848 | 0.00157076 | 0.617013 | 3.90E-10 | 454724 |

**Table S2.D Summary of the SNPs (after clumping process) associated with fat percentage of right arm (per SD increase)**

| **exposure** | **SNP** | **chromosome** | **position** | **effect_allele** | **other_allele** | **beta** | **se** | **eaf** | **pval** | **samplesize** |
| --- | --- | --- | --- | --- | --- | --- | --- | --- | --- | --- |
| Arm fat percentage (right) | rs2452774 | 1 | 29566552 | G | A | 0.0132057 | 0.00239035 | 0.884359 | 3.30E-08 | 454789 |
| Arm fat percentage (right) | rs7519259 | 1 | 66434743 | A | G | 0.00958476 | 0.00153673 | 0.528341 | 4.50E-10 | 454789 |
| Arm fat percentage (right) | rs67807996 | 1 | 149995265 | A | G | 0.0156657 | 0.00161097 | 0.39565 | 2.40E-22 | 454789 |
| Arm fat percentage (right) | rs7511673 | 1 | 150707636 | T | A | -0.00897132 | 0.00156366 | 0.392849 | 9.60E-09 | 454789 |
| Arm fat percentage (right) | rs539515 | 1 | 177889025 | C | A | 0.0338661 | 0.00189162 | 0.204986 | 1.10E-71 | 454789 |
| Arm fat percentage (right) | rs2678204 | 1 | 201800511 | G | T | 0.014592 | 0.00161217 | 0.340181 | 1.40E-19 | 454789 |
| Arm fat percentage (right) | rs7516508 | 1 | 34262334 | A | T | -0.0084986 | 0.00154168 | 0.512553 | 3.50E-08 | 454789 |
| Arm fat percentage (right) | rs6669341 | 1 | 47678458 | G | A | -0.0127024 | 0.00154828 | 0.582712 | 2.30E-16 | 454789 |
| Arm fat percentage (right) | rs11165643 | 1 | 96924097 | T | C | 0.0151691 | 0.00155156 | 0.590148 | 1.40E-22 | 454789 |
| Arm fat percentage (right) | rs61813324 | 1 | 156049877 | T | C | 0.019371 | 0.00226223 | 0.13571 | 1.10E-17 | 454789 |
| Arm fat percentage (right) | rs1377184 | 1 | 215246432 | T | A | 0.0110429 | 0.00176838 | 0.748944 | 4.20E-10 | 454789 |
| Arm fat percentage (right) | rs72634826 | 1 | 1601052 | A | G | -0.0141752 | 0.00176602 | 0.259875 | 1.00E-15 | 454789 |
| Arm fat percentage (right) | rs14057 | 1 | 6683240 | A | G | -0.00894448 | 0.00159833 | 0.356579 | 2.20E-08 | 454789 |
| Arm fat percentage (right) | rs1318408 | 1 | 11925781 | G | A | 0.0146216 | 0.00236187 | 0.119506 | 6.00E-10 | 454789 |
| Arm fat percentage (right) | rs113603865 | 1 | 39564930 | T | C | 0.0123375 | 0.00187963 | 0.212066 | 5.20E-11 | 454789 |
| Arm fat percentage (right) | rs12140153 | 1 | 62579891 | T | G | -0.0257811 | 0.00267877 | 0.094275 | 6.30E-22 | 454789 |
| Arm fat percentage (right) | rs71658797 | 1 | 77967507 | A | T | 0.0243254 | 0.00234892 | 0.120742 | 3.90E-25 | 454789 |
| Arm fat percentage (right) | rs12072739 | 1 | 98315893 | G | A | 0.0132583 | 0.00183296 | 0.224594 | 4.70E-13 | 454789 |
| Arm fat percentage (right) | rs12033257 | 1 | 112318484 | G | A | -0.00891963 | 0.0015832 | 0.382343 | 1.80E-08 | 454789 |
| Arm fat percentage (right) | rs1888623 | 1 | 195048816 | T | A | -0.0125672 | 0.00182195 | 0.227344 | 5.30E-12 | 454789 |
| Arm fat percentage (right) | rs2820446 | 1 | 219748818 | G | C | 0.0180629 | 0.00166842 | 0.29729 | 2.60E-27 | 454789 |
| Arm fat percentage (right) | rs10799778 | 1 | 23313353 | G | T | -0.015348 | 0.00205156 | 0.833684 | 7.40E-14 | 454789 |
| Arm fat percentage (right) | rs3766823 | 1 | 32197257 | A | G | 0.0130996 | 0.00202427 | 0.17202 | 9.70E-11 | 454789 |
| Arm fat percentage (right) | rs6693294 | 1 | 49879122 | G | A | -0.0134572 | 0.00164946 | 0.688567 | 3.40E-16 | 454789 |
| Arm fat percentage (right) | rs6688826 | 1 | 80812329 | C | T | 0.00980474 | 0.00166689 | 0.298192 | 4.10E-09 | 454789 |
| Arm fat percentage (right) | rs144376234 | 1 | 110114504 | T | C | 0.053775 | 0.00484029 | 0.025647 | 1.10E-28 | 454789 |
| Arm fat percentage (right) | rs75035127 | 1 | 174973726 | G | A | -0.0267709 | 0.00445224 | 0.030382 | 1.80E-09 | 454789 |
| Arm fat percentage (right) | rs815163 | 1 | 190294726 | C | T | -0.0101739 | 0.00153833 | 0.563226 | 3.80E-11 | 454789 |
| Arm fat percentage (right) | rs4562625 | 1 | 209218583 | G | C | -0.0103189 | 0.00156871 | 0.614927 | 4.80E-11 | 454789 |
| Arm fat percentage (right) | rs13375176 | 1 | 222099865 | C | T | -0.0126658 | 0.00191081 | 0.201967 | 3.40E-11 | 454789 |
| Arm fat percentage (right) | rs12042959 | 1 | 243533273 | G | A | -0.0147191 | 0.00218704 | 0.14393 | 1.70E-11 | 454789 |
| Arm fat percentage (right) | rs383701 | 1 | 243842288 | A | G | -0.0127433 | 0.00226583 | 0.868882 | 1.90E-08 | 454789 |
| Arm fat percentage (right) | rs3732103 | 2 | 11312224 | T | C | 0.00895974 | 0.00154321 | 0.561693 | 6.40E-09 | 454789 |
| Arm fat percentage (right) | rs59086897 | 2 | 25145173 | A | T | 0.0262812 | 0.00152586 | 0.487602 | 1.80E-66 | 454789 |
| Arm fat percentage (right) | rs10187101 | 2 | 50742227 | T | C | -0.0103288 | 0.00158671 | 0.363611 | 7.50E-11 | 454789 |
| Arm fat percentage (right) | rs114964326 | 2 | 146015229 | A | G | -0.0254193 | 0.0045888 | 0.028986 | 3.00E-08 | 454789 |
| Arm fat percentage (right) | rs1366836 | 2 | 198172148 | G | T | 0.00969192 | 0.00156974 | 0.384725 | 6.60E-10 | 454789 |
| Arm fat percentage (right) | rs62106258 | 2 | 417167 | C | T | -0.0574442 | 0.00354996 | 0.048536 | 6.80E-59 | 454789 |
| Arm fat percentage (right) | rs12992672 | 2 | 632592 | A | G | 0.0322277 | 0.00202075 | 0.828115 | 2.90E-57 | 454789 |
| Arm fat percentage (right) | rs12475388 | 2 | 27039792 | A | G | -0.00983399 | 0.00153527 | 0.48571 | 1.50E-10 | 454789 |
| Arm fat percentage (right) | rs3771653 | 2 | 159483811 | T | C | 0.0091373 | 0.00157989 | 0.626577 | 7.30E-09 | 454789 |
| Arm fat percentage (right) | rs3770799 | 2 | 36788616 | G | A | 0.0118869 | 0.00158186 | 0.369632 | 5.70E-14 | 454789 |
| Arm fat percentage (right) | rs6711390 | 2 | 135629439 | T | C | -0.0100625 | 0.00157066 | 0.371288 | 1.50E-10 | 454789 |
| Arm fat percentage (right) | rs34234296 | 2 | 175166636 | A | G | -0.0103643 | 0.00158024 | 0.392486 | 5.40E-11 | 454789 |
| Arm fat percentage (right) | rs2943653 | 2 | 227047771 | T | C | -0.0149593 | 0.00162687 | 0.672841 | 3.70E-20 | 454789 |
| Arm fat percentage (right) | rs62190394 | 2 | 230624929 | T | C | 0.0139759 | 0.00164161 | 0.317035 | 1.70E-17 | 454789 |
| Arm fat percentage (right) | rs2693823 | 2 | 6164762 | A | T | -0.00960075 | 0.00174701 | 0.260546 | 3.90E-08 | 454789 |
| Arm fat percentage (right) | rs725375 | 2 | 40167555 | T | G | -0.010374 | 0.00181105 | 0.232286 | 1.00E-08 | 454789 |
| Arm fat percentage (right) | rs7422252 | 2 | 69528577 | T | C | 0.0128323 | 0.00155764 | 0.591449 | 1.70E-16 | 454789 |
| Arm fat percentage (right) | rs429343 | 2 | 147903382 | G | A | -0.0113197 | 0.00154726 | 0.57656 | 2.60E-13 | 454789 |
| Arm fat percentage (right) | rs12471400 | 2 | 202917009 | C | T | 0.00870135 | 0.00153428 | 0.517357 | 1.40E-08 | 454789 |
| Arm fat percentage (right) | rs72938355 | 2 | 204152381 | T | G | 0.00914348 | 0.0015345 | 0.553831 | 2.50E-09 | 454789 |
| Arm fat percentage (right) | rs4482463 | 2 | 205375909 | A | C | -0.0218383 | 0.00287226 | 0.923053 | 2.90E-14 | 454789 |
| Arm fat percentage (right) | rs4605363 | 2 | 229010960 | C | A | 0.0118838 | 0.00160907 | 0.341583 | 1.50E-13 | 454789 |
| Arm fat percentage (right) | rs62136933 | 2 | 46909809 | A | G | -0.0166104 | 0.00197743 | 0.184264 | 4.50E-17 | 454789 |
| Arm fat percentage (right) | rs1861410 | 2 | 58933591 | T | C | -0.0137315 | 0.0015409 | 0.555357 | 5.00E-19 | 454789 |
| Arm fat percentage (right) | rs6545714 | 2 | 59307725 | A | G | -0.0149384 | 0.00156151 | 0.601476 | 1.10E-21 | 454789 |
| Arm fat percentage (right) | rs396354 | 2 | 86850022 | C | T | -0.0105363 | 0.00169678 | 0.715649 | 5.30E-10 | 454789 |
| Arm fat percentage (right) | rs11691869 | 2 | 100805996 | A | C | -0.0137831 | 0.00159244 | 0.361918 | 4.90E-18 | 454789 |
| Arm fat percentage (right) | rs3087523 | 2 | 105977776 | A | G | 0.0133671 | 0.00232487 | 0.124621 | 8.90E-09 | 454789 |
| Arm fat percentage (right) | rs764729 | 2 | 161126732 | C | A | 0.0100122 | 0.00171841 | 0.728019 | 5.70E-09 | 454789 |
| Arm fat percentage (right) | rs13389219 | 2 | 165528876 | T | C | 0.0152502 | 0.00156161 | 0.392416 | 1.60E-22 | 454789 |
| Arm fat percentage (right) | rs796839 | 2 | 172916214 | C | A | 0.00891608 | 0.001568 | 0.615049 | 1.30E-08 | 454789 |
| Arm fat percentage (right) | rs6741769 | 2 | 181500545 | A | G | 0.0113497 | 0.00166187 | 0.305768 | 8.50E-12 | 454789 |
| Arm fat percentage (right) | rs4673617 | 2 | 212290579 | T | C | 0.0106849 | 0.00172127 | 0.271776 | 5.40E-10 | 454789 |
| Arm fat percentage (right) | rs9843007 | 3 | 61207077 | T | A | -0.0105913 | 0.00157986 | 0.3735 | 2.00E-11 | 454789 |
| Arm fat percentage (right) | rs3772882 | 3 | 81808602 | A | C | 0.00943485 | 0.00157947 | 0.373219 | 2.30E-09 | 454789 |
| Arm fat percentage (right) | rs4123668 | 3 | 82629523 | C | T | 0.010167 | 0.00156053 | 0.402711 | 7.30E-11 | 454789 |
| Arm fat percentage (right) | rs3911063 | 3 | 85906928 | C | T | -0.010884 | 0.00163922 | 0.321995 | 3.10E-11 | 454789 |
| Arm fat percentage (right) | rs1454687 | 3 | 94038085 | G | C | -0.0148595 | 0.0015285 | 0.515343 | 2.40E-22 | 454789 |
| Arm fat percentage (right) | rs1495181 | 3 | 31450478 | G | A | -0.00926603 | 0.00169874 | 0.282289 | 4.90E-08 | 454789 |
| Arm fat percentage (right) | rs2035831 | 3 | 173683791 | C | G | -0.0088838 | 0.00162803 | 0.33186 | 4.80E-08 | 454789 |
| Arm fat percentage (right) | rs62246311 | 3 | 9498143 | A | G | 0.0161477 | 0.00252092 | 0.102332 | 1.50E-10 | 454789 |
| Arm fat percentage (right) | rs12054057 | 3 | 44464535 | A | G | 0.0138779 | 0.0021034 | 0.157627 | 4.20E-11 | 454789 |
| Arm fat percentage (right) | rs9968060 | 3 | 62471282 | T | C | 0.0112547 | 0.00162439 | 0.642607 | 4.30E-12 | 454789 |
| Arm fat percentage (right) | rs9816797 | 3 | 131614595 | G | A | 0.0160072 | 0.00170876 | 0.27738 | 7.40E-21 | 454789 |
| Arm fat percentage (right) | rs1964675 | 3 | 136114945 | T | C | 0.00985324 | 0.0016887 | 0.71109 | 5.40E-09 | 454789 |
| Arm fat percentage (right) | rs10490869 | 3 | 35635145 | T | A | 0.0117671 | 0.00188561 | 0.209557 | 4.40E-10 | 454789 |
| Arm fat percentage (right) | rs9843653 | 3 | 49920571 | C | T | 0.0169062 | 0.00152954 | 0.511539 | 2.10E-28 | 454789 |
| Arm fat percentage (right) | rs2035936 | 3 | 141298124 | T | G | 0.0253919 | 0.00337516 | 0.055879 | 5.30E-14 | 454789 |
| Arm fat percentage (right) | rs35160042 | 3 | 170563677 | A | G | 0.0105699 | 0.00179315 | 0.238397 | 3.80E-09 | 454789 |
| Arm fat percentage (right) | rs529200 | 3 | 173114305 | G | A | 0.0118161 | 0.00153216 | 0.527779 | 1.20E-14 | 454789 |
| Arm fat percentage (right) | rs2606227 | 3 | 183536836 | C | T | -0.0105045 | 0.00159968 | 0.63138 | 5.10E-11 | 454789 |
| Arm fat percentage (right) | rs4234589 | 3 | 185818882 | G | A | -0.0186952 | 0.00222169 | 0.137194 | 3.90E-17 | 454789 |
| Arm fat percentage (right) | rs6782581 | 3 | 196979106 | G | C | -0.00925154 | 0.00154014 | 0.439293 | 1.90E-09 | 454789 |
| Arm fat percentage (right) | rs1801282 | 3 | 12393125 | G | C | 0.0242518 | 0.00235013 | 0.119544 | 5.80E-25 | 454789 |
| Arm fat percentage (right) | rs7619139 | 3 | 25110415 | A | T | 0.00937156 | 0.00155702 | 0.588637 | 1.80E-09 | 454789 |
| Arm fat percentage (right) | rs28350 | 3 | 42418446 | G | A | -0.0118376 | 0.00199956 | 0.820612 | 3.20E-09 | 454789 |
| Arm fat percentage (right) | rs7630228 | 3 | 71681487 | C | T | -0.0103314 | 0.00155045 | 0.4343 | 2.70E-11 | 454789 |
| Arm fat percentage (right) | rs1078455 | 3 | 108129348 | C | T | 0.0114289 | 0.00166636 | 0.309499 | 7.00E-12 | 454789 |
| Arm fat percentage (right) | rs9839081 | 3 | 123051230 | A | G | -0.011285 | 0.00165769 | 0.325084 | 9.90E-12 | 454789 |
| Arm fat percentage (right) | rs1357079 | 3 | 153691949 | C | T | 0.0105126 | 0.00154703 | 0.570062 | 1.10E-11 | 454789 |
| Arm fat percentage (right) | rs13317303 | 3 | 156302724 | A | C | -0.0148447 | 0.00214183 | 0.150185 | 4.20E-12 | 454789 |
| Arm fat percentage (right) | rs2798297 | 4 | 3064004 | A | G | 0.00893707 | 0.00159909 | 0.366707 | 2.30E-08 | 454789 |
| Arm fat percentage (right) | rs73213484 | 4 | 28489339 | T | A | -0.0157759 | 0.00219681 | 0.141224 | 6.90E-13 | 454789 |
| Arm fat percentage (right) | rs2237025 | 4 | 55541879 | C | T | -0.00867191 | 0.00155115 | 0.5554 | 2.30E-08 | 454789 |
| Arm fat percentage (right) | rs72649373 | 4 | 80609966 | C | T | 0.0153857 | 0.00222809 | 0.143267 | 5.00E-12 | 454789 |
| Arm fat percentage (right) | rs2583636 | 4 | 83153179 | T | G | -0.00888591 | 0.00153191 | 0.449879 | 6.60E-09 | 454789 |
| Arm fat percentage (right) | rs1229984 | 4 | 100239319 | C | T | 0.0275366 | 0.00464078 | 0.97278 | 3.00E-09 | 454789 |
| Arm fat percentage (right) | rs326894 | 4 | 112691992 | T | C | 0.00862166 | 0.0015628 | 0.602056 | 3.50E-08 | 454789 |
| Arm fat percentage (right) | rs10938398 | 4 | 45186139 | A | G | 0.0207668 | 0.00154627 | 0.433507 | 4.00E-41 | 454789 |
| Arm fat percentage (right) | rs3113509 | 4 | 52932825 | T | C | -0.00955767 | 0.00172772 | 0.731973 | 3.20E-08 | 454789 |
| Arm fat percentage (right) | rs6840236 | 4 | 56289785 | C | T | 0.0100281 | 0.0015347 | 0.464869 | 6.40E-11 | 454789 |
| Arm fat percentage (right) | rs57400569 | 4 | 89752276 | A | G | 0.0130953 | 0.00186178 | 0.214652 | 2.00E-12 | 454789 |
| Arm fat percentage (right) | rs4864201 | 4 | 130731284 | C | T | -0.0105982 | 0.00160183 | 0.65096 | 3.70E-11 | 454789 |
| Arm fat percentage (right) | rs4088476 | 4 | 34911685 | T | C | 0.00922221 | 0.00161402 | 0.660795 | 1.10E-08 | 454789 |
| Arm fat percentage (right) | rs1383723 | 4 | 67803507 | T | A | -0.0106672 | 0.00186031 | 0.783146 | 9.80E-09 | 454789 |
| Arm fat percentage (right) | rs3733336 | 4 | 81207963 | G | A | -0.00916461 | 0.00167301 | 0.35985 | 4.30E-08 | 454789 |
| Arm fat percentage (right) | rs1296328 | 4 | 137083193 | C | A | -0.0121652 | 0.00154771 | 0.558991 | 3.80E-15 | 454789 |
| Arm fat percentage (right) | rs56375099 | 4 | 140848823 | T | C | -0.0113035 | 0.00173975 | 0.266252 | 8.20E-11 | 454789 |
| Arm fat percentage (right) | rs113079574 | 4 | 147354089 | T | C | -0.0132061 | 0.00194821 | 0.192748 | 1.20E-11 | 454789 |
| Arm fat percentage (right) | rs2192527 | 4 | 18329824 | G | A | 0.0131186 | 0.0015344 | 0.465491 | 1.20E-17 | 454789 |
| Arm fat percentage (right) | rs4419475 | 4 | 96150044 | T | A | 0.00903241 | 0.00155655 | 0.407329 | 6.50E-09 | 454789 |
| Arm fat percentage (right) | rs13107325 | 4 | 103188709 | T | C | 0.0368686 | 0.00290787 | 0.074866 | 7.70E-37 | 454789 |
| Arm fat percentage (right) | rs1991002 | 5 | 52848593 | G | T | -0.00923461 | 0.00153451 | 0.495154 | 1.80E-09 | 454789 |
| Arm fat percentage (right) | rs1503526 | 5 | 63020706 | C | T | 0.0117844 | 0.0015306 | 0.479962 | 1.40E-14 | 454789 |
| Arm fat percentage (right) | rs252748 | 5 | 77390494 | T | C | -0.00878406 | 0.00156351 | 0.590936 | 1.90E-08 | 454789 |
| Arm fat percentage (right) | rs4489042 | 5 | 92428154 | C | G | -0.00941757 | 0.00158348 | 0.373325 | 2.70E-09 | 454789 |
| Arm fat percentage (right) | rs40067 | 5 | 107439012 | A | G | -0.0157748 | 0.00204146 | 0.170164 | 1.10E-14 | 454789 |
| Arm fat percentage (right) | rs10070510 | 5 | 128014834 | C | T | -0.0146466 | 0.00251941 | 0.105231 | 6.10E-09 | 454789 |
| Arm fat percentage (right) | rs890793 | 5 | 153573938 | T | C | 0.00942413 | 0.00157399 | 0.385657 | 2.10E-09 | 454789 |
| Arm fat percentage (right) | rs2610245 | 5 | 63978255 | G | A | -0.00905303 | 0.00155645 | 0.51788 | 6.00E-09 | 454789 |
| Arm fat percentage (right) | rs34580448 | 5 | 82810884 | C | T | -0.0259364 | 0.00385288 | 0.041254 | 1.70E-11 | 454789 |
| Arm fat percentage (right) | rs323782 | 5 | 86782273 | A | G | 0.0325295 | 0.0052909 | 0.021388 | 7.80E-10 | 454789 |
| Arm fat percentage (right) | rs6864305 | 5 | 118683065 | C | T | 0.00913482 | 0.00166401 | 0.306959 | 4.00E-08 | 454789 |
| Arm fat percentage (right) | rs17055847 | 5 | 157983114 | C | T | 0.0131213 | 0.00168254 | 0.295441 | 6.30E-15 | 454789 |
| Arm fat percentage (right) | rs7730898 | 5 | 170459675 | A | G | 0.0151944 | 0.001721 | 0.729112 | 1.10E-18 | 454789 |
| Arm fat percentage (right) | rs10050620 | 5 | 63927239 | T | C | -0.011488 | 0.00163405 | 0.325413 | 2.10E-12 | 454789 |
| Arm fat percentage (right) | rs34483452 | 5 | 87986314 | A | C | 0.0240508 | 0.00224761 | 0.136321 | 1.00E-26 | 454789 |
| Arm fat percentage (right) | rs347551 | 5 | 119389031 | G | C | 0.0112393 | 0.00155656 | 0.472311 | 5.20E-13 | 454789 |
| Arm fat percentage (right) | rs13174863 | 5 | 139080745 | G | A | 0.0158979 | 0.00216936 | 0.148136 | 2.30E-13 | 454789 |
| Arm fat percentage (right) | rs13160735 | 5 | 144485978 | A | G | 0.0109893 | 0.00164384 | 0.322388 | 2.30E-11 | 454789 |
| Arm fat percentage (right) | rs17820010 | 5 | 50384662 | G | T | 0.0105712 | 0.00167611 | 0.2956 | 2.80E-10 | 454789 |
| Arm fat percentage (right) | rs2307111 | 5 | 75003678 | C | T | -0.0168907 | 0.00156536 | 0.395094 | 3.80E-27 | 454789 |
| Arm fat percentage (right) | rs141008767 | 5 | 87825151 | T | C | -0.0334445 | 0.00583181 | 0.018215 | 9.80E-09 | 454789 |
| Arm fat percentage (right) | rs2161097 | 5 | 103945178 | T | C | 0.00948719 | 0.00153971 | 0.437923 | 7.20E-10 | 454789 |
| Arm fat percentage (right) | rs4705778 | 5 | 112448907 | C | T | -0.010673 | 0.00153499 | 0.538609 | 3.60E-12 | 454789 |
| Arm fat percentage (right) | rs62366251 | 5 | 80829177 | G | A | -0.0121163 | 0.00181221 | 0.231575 | 2.30E-11 | 454789 |
| Arm fat percentage (right) | rs2569881 | 6 | 1620037 | A | G | -0.0141204 | 0.00230011 | 0.12866 | 8.30E-10 | 454789 |
| Arm fat percentage (right) | rs4377779 | 6 | 12117344 | C | T | -0.0110138 | 0.00160747 | 0.346836 | 7.30E-12 | 454789 |
| Arm fat percentage (right) | rs3806114 | 6 | 20482335 | A | G | -0.0102569 | 0.00164282 | 0.668517 | 4.30E-10 | 454789 |
| Arm fat percentage (right) | rs1358980 | 6 | 43764551 | T | C | -0.0118048 | 0.0015427 | 0.483418 | 2.00E-14 | 454789 |
| Arm fat percentage (right) | rs72892910 | 6 | 50816887 | T | G | 0.0244699 | 0.00202888 | 0.17221 | 1.70E-33 | 454789 |
| Arm fat percentage (right) | rs28594633 | 6 | 32524224 | A | G | 0.0110465 | 0.00192701 | 0.346822 | 9.90E-09 | 454789 |
| Arm fat percentage (right) | rs9366863 | 6 | 34688946 | C | T | -0.0186391 | 0.00162671 | 0.671967 | 2.10E-30 | 454789 |
| Arm fat percentage (right) | rs62413425 | 6 | 80357601 | T | C | 0.0135922 | 0.00242235 | 0.114067 | 2.00E-08 | 454789 |
| Arm fat percentage (right) | rs4945884 | 6 | 111895860 | C | T | 0.00985685 | 0.00168976 | 0.709602 | 5.40E-09 | 454789 |
| Arm fat percentage (right) | rs1046080 | 6 | 31595882 | A | C | 0.0163543 | 0.00170276 | 0.721635 | 7.60E-22 | 454789 |
| Arm fat percentage (right) | rs2033531 | 6 | 40347895 | C | T | 0.0106275 | 0.0015625 | 0.404545 | 1.00E-11 | 454789 |
| Arm fat percentage (right) | rs7776021 | 6 | 73742152 | A | G | 0.0101577 | 0.00169005 | 0.287593 | 1.90E-09 | 454789 |
| Arm fat percentage (right) | rs57989773 | 6 | 100629078 | C | T | 0.0122955 | 0.00182992 | 0.244921 | 1.80E-11 | 454789 |
| Arm fat percentage (right) | rs9491652 | 6 | 126943620 | C | G | -0.012713 | 0.0015315 | 0.496215 | 1.00E-16 | 454789 |
| Arm fat percentage (right) | rs7755574 | 6 | 153364643 | T | G | 0.0103986 | 0.00169974 | 0.282695 | 9.50E-10 | 454789 |
| Arm fat percentage (right) | rs35449999 | 6 | 163023465 | G | A | -0.0133413 | 0.00223382 | 0.13641 | 2.30E-09 | 454789 |
| Arm fat percentage (right) | rs75499503 | 6 | 26145217 | T | C | -0.0177816 | 0.00187261 | 0.220141 | 2.20E-21 | 454789 |
| Arm fat percentage (right) | rs2465043 | 6 | 51180765 | A | G | -0.009967 | 0.00160897 | 0.351577 | 5.80E-10 | 454789 |
| Arm fat percentage (right) | rs149423876 | 6 | 85298357 | A | G | 0.00972829 | 0.00175083 | 0.258748 | 2.80E-08 | 454789 |
| Arm fat percentage (right) | rs2388334 | 6 | 98591622 | G | A | -0.0137976 | 0.00153361 | 0.482465 | 2.30E-19 | 454789 |
| Arm fat percentage (right) | rs2253310 | 6 | 108888593 | G | C | 0.00998196 | 0.00158038 | 0.626168 | 2.70E-10 | 454789 |
| Arm fat percentage (right) | rs9370068 | 6 | 51716715 | T | C | 0.0107734 | 0.00154053 | 0.517654 | 2.70E-12 | 454789 |
| Arm fat percentage (right) | rs7796825 | 7 | 14317417 | A | G | 0.0112887 | 0.0020218 | 0.825769 | 2.40E-08 | 454789 |
| Arm fat percentage (right) | rs9770544 | 7 | 27232126 | G | C | -0.0176471 | 0.00201105 | 0.820331 | 1.70E-18 | 454789 |
| Arm fat percentage (right) | rs12375196 | 7 | 103416541 | A | C | 0.0116088 | 0.0015578 | 0.424288 | 9.20E-14 | 454789 |
| Arm fat percentage (right) | rs972283 | 7 | 130466854 | G | A | -0.0117273 | 0.00152926 | 0.511931 | 1.70E-14 | 454789 |
| Arm fat percentage (right) | rs58862095 | 7 | 75081418 | T | C | -0.014967 | 0.00155477 | 0.419267 | 6.20E-22 | 454789 |
| Arm fat percentage (right) | rs10245306 | 7 | 158029340 | C | G | 0.00940615 | 0.00166276 | 0.685975 | 1.50E-08 | 454789 |
| Arm fat percentage (right) | rs4307239 | 7 | 24354300 | G | A | 0.00851542 | 0.00153921 | 0.458845 | 3.20E-08 | 454789 |
| Arm fat percentage (right) | rs4549685 | 7 | 39326478 | T | C | -0.0117922 | 0.00162867 | 0.329799 | 4.50E-13 | 454789 |
| Arm fat percentage (right) | rs42523 | 7 | 94040999 | C | T | 0.0098926 | 0.00178192 | 0.245209 | 2.80E-08 | 454789 |
| Arm fat percentage (right) | rs12530791 | 7 | 113427773 | A | G | -0.0107193 | 0.00154453 | 0.567682 | 3.90E-12 | 454789 |
| Arm fat percentage (right) | rs55810445 | 7 | 2103739 | T | C | -0.0149876 | 0.00213971 | 0.151188 | 2.50E-12 | 454789 |
| Arm fat percentage (right) | rs4722398 | 7 | 3125220 | T | C | 0.0144677 | 0.00222667 | 0.136116 | 8.20E-11 | 454789 |
| Arm fat percentage (right) | rs172558 | 7 | 32448121 | T | C | 0.0122 | 0.00178482 | 0.251402 | 8.20E-12 | 454789 |
| Arm fat percentage (right) | rs11767811 | 7 | 71620988 | A | G | -0.0111755 | 0.00198383 | 0.181443 | 1.80E-08 | 454789 |
| Arm fat percentage (right) | rs7806643 | 7 | 112981602 | T | C | -0.013363 | 0.00154322 | 0.434819 | 4.80E-18 | 454789 |
| Arm fat percentage (right) | rs10269783 | 7 | 49616203 | A | G | 0.00895858 | 0.00157238 | 0.387848 | 1.20E-08 | 454789 |
| Arm fat percentage (right) | rs1852006 | 7 | 77829768 | A | G | -0.010828 | 0.00159679 | 0.35697 | 1.20E-11 | 454789 |
| Arm fat percentage (right) | rs3901286 | 7 | 99107727 | A | C | -0.0158677 | 0.00213384 | 0.152427 | 1.00E-13 | 454789 |
| Arm fat percentage (right) | rs2980237 | 8 | 76315205 | T | G | 0.0107019 | 0.00177498 | 0.751219 | 1.60E-09 | 454789 |
| Arm fat percentage (right) | rs7463186 | 8 | 87517201 | G | A | 0.00843096 | 0.00153089 | 0.516029 | 3.60E-08 | 454789 |
| Arm fat percentage (right) | rs13252030 | 8 | 112491883 | G | A | 0.0115133 | 0.00173491 | 0.732619 | 3.20E-11 | 454789 |
| Arm fat percentage (right) | rs2954021 | 8 | 126482077 | G | A | 0.0118757 | 0.00153075 | 0.504594 | 8.60E-15 | 454789 |
| Arm fat percentage (right) | rs2466103 | 8 | 32412304 | G | T | 0.0101391 | 0.00166331 | 0.303562 | 1.10E-09 | 454789 |
| Arm fat percentage (right) | rs4737188 | 8 | 64756657 | T | A | -0.00911242 | 0.00153481 | 0.473836 | 2.90E-09 | 454789 |
| Arm fat percentage (right) | rs1808629 | 8 | 73435964 | A | G | -0.0149997 | 0.00165503 | 0.685439 | 1.30E-19 | 454789 |
| Arm fat percentage (right) | rs4876611 | 8 | 116671848 | G | A | 0.0178598 | 0.00170653 | 0.720196 | 1.20E-25 | 454789 |
| Arm fat percentage (right) | rs4466418 | 8 | 126323787 | A | G | 0.00897333 | 0.00154523 | 0.562255 | 6.40E-09 | 454789 |
| Arm fat percentage (right) | rs7824675 | 8 | 10243418 | A | C | -0.0110485 | 0.00153778 | 0.51942 | 6.70E-13 | 454789 |
| Arm fat percentage (right) | rs11786089 | 8 | 21975521 | G | A | 0.0106121 | 0.0015388 | 0.459691 | 5.30E-12 | 454789 |
| Arm fat percentage (right) | rs6998660 | 8 | 143373972 | G | A | 0.00866517 | 0.00153956 | 0.452667 | 1.80E-08 | 454789 |
| Arm fat percentage (right) | rs2717609 | 8 | 143769252 | T | A | -0.00925176 | 0.00154774 | 0.46612 | 2.30E-09 | 454789 |
| Arm fat percentage (right) | rs1559900 | 8 | 14207321 | T | C | 0.0101351 | 0.00169318 | 0.286127 | 2.20E-09 | 454789 |
| Arm fat percentage (right) | rs117176448 | 8 | 27261138 | G | C | 0.0146056 | 0.00259398 | 0.096167 | 1.80E-08 | 454789 |
| Arm fat percentage (right) | rs1421334 | 8 | 30865733 | C | A | -0.0103703 | 0.00154608 | 0.548845 | 2.00E-11 | 454789 |
| Arm fat percentage (right) | rs1609010 | 8 | 77227464 | G | A | 0.0164601 | 0.00154548 | 0.565696 | 1.70E-26 | 454789 |
| Arm fat percentage (right) | rs10756792 | 9 | 16726119 | T | C | -0.0154943 | 0.00175928 | 0.743075 | 1.30E-18 | 454789 |
| Arm fat percentage (right) | rs1412239 | 9 | 28425515 | G | C | 0.0171644 | 0.00163417 | 0.323103 | 8.30E-26 | 454789 |
| Arm fat percentage (right) | rs7849634 | 9 | 99256215 | C | T | -0.010839 | 0.00195922 | 0.188526 | 3.20E-08 | 454789 |
| Arm fat percentage (right) | rs12338803 | 9 | 116025428 | C | A | 0.0107717 | 0.00171634 | 0.274781 | 3.50E-10 | 454789 |
| Arm fat percentage (right) | rs687621 | 9 | 136137065 | G | A | 0.0113067 | 0.00164133 | 0.320087 | 5.60E-12 | 454789 |
| Arm fat percentage (right) | rs10116857 | 9 | 16595649 | A | C | -0.0225216 | 0.00318253 | 0.061824 | 1.50E-12 | 454789 |
| Arm fat percentage (right) | rs7357754 | 9 | 92207308 | G | A | 0.0119384 | 0.00153538 | 0.500118 | 7.50E-15 | 454789 |
| Arm fat percentage (right) | rs12376870 | 9 | 117890567 | A | G | -0.0116899 | 0.00180349 | 0.237671 | 9.10E-11 | 454789 |
| Arm fat percentage (right) | rs34882821 | 9 | 14783314 | T | G | 0.00915016 | 0.00162242 | 0.338499 | 1.70E-08 | 454789 |
| Arm fat percentage (right) | rs12001437 | 9 | 34074476 | C | T | 0.0090339 | 0.0015872 | 0.367756 | 1.30E-08 | 454789 |
| Arm fat percentage (right) | rs3802422 | 9 | 37097172 | A | G | -0.00989225 | 0.00158077 | 0.373594 | 3.90E-10 | 454789 |
| Arm fat percentage (right) | rs215498 | 9 | 14440739 | T | G | 0.00924787 | 0.00164514 | 0.324131 | 1.90E-08 | 454789 |
| Arm fat percentage (right) | rs16916303 | 9 | 30823761 | G | A | -0.0136218 | 0.00238327 | 0.119773 | 1.10E-08 | 454789 |
| Arm fat percentage (right) | rs725959 | 9 | 81349608 | T | G | -0.00877465 | 0.00156214 | 0.412477 | 1.90E-08 | 454789 |
| Arm fat percentage (right) | rs10760724 | 9 | 103085144 | C | T | 0.0107924 | 0.00153155 | 0.477321 | 1.80E-12 | 454789 |
| Arm fat percentage (right) | rs7027304 | 9 | 129408290 | T | C | 0.0124524 | 0.00161526 | 0.652642 | 1.30E-14 | 454789 |
| Arm fat percentage (right) | rs13292699 | 9 | 15910044 | C | A | -0.017846 | 0.001547 | 0.433719 | 8.70E-31 | 454789 |
| Arm fat percentage (right) | rs4837119 | 9 | 129672095 | A | T | -0.0130038 | 0.00153581 | 0.517264 | 2.50E-17 | 454789 |
| Arm fat percentage (right) | rs11795079 | 9 | 136930134 | C | T | -0.0121618 | 0.0020639 | 0.164692 | 3.80E-09 | 454789 |
| Arm fat percentage (right) | rs7893571 | 10 | 16750129 | T | G | 0.00917057 | 0.00162699 | 0.665919 | 1.70E-08 | 454789 |
| Arm fat percentage (right) | rs10886022 | 10 | 118778079 | C | A | -0.013575 | 0.00183717 | 0.763353 | 1.50E-13 | 454789 |
| Arm fat percentage (right) | rs12254515 | 10 | 70337590 | G | T | -0.00921589 | 0.00154468 | 0.56315 | 2.40E-09 | 454789 |
| Arm fat percentage (right) | rs35198068 | 10 | 114754784 | C | T | -0.00937845 | 0.00168453 | 0.291522 | 2.60E-08 | 454789 |
| Arm fat percentage (right) | rs117118217 | 10 | 131783328 | C | G | 0.0349835 | 0.00610068 | 0.017707 | 9.80E-09 | 454789 |
| Arm fat percentage (right) | rs10999460 | 10 | 72428283 | T | C | 0.0129715 | 0.00174142 | 0.265504 | 9.40E-14 | 454789 |
| Arm fat percentage (right) | rs10788497 | 10 | 88127995 | C | G | 0.0103178 | 0.00153337 | 0.499604 | 1.70E-11 | 454789 |
| Arm fat percentage (right) | rs2439823 | 10 | 99778226 | G | A | 0.0136319 | 0.00154154 | 0.545574 | 9.30E-19 | 454789 |
| Arm fat percentage (right) | rs61871615 | 10 | 102487140 | T | C | -0.0194776 | 0.00278196 | 0.091505 | 2.50E-12 | 454789 |
| Arm fat percentage (right) | rs11017772 | 10 | 132954247 | T | C | -0.0112764 | 0.00189779 | 0.205917 | 2.80E-09 | 454789 |
| Arm fat percentage (right) | rs34930419 | 10 | 33987329 | C | T | 0.0263035 | 0.00431827 | 0.033187 | 1.10E-09 | 454789 |
| Arm fat percentage (right) | rs12762744 | 10 | 53669252 | T | C | 0.0098917 | 0.00177527 | 0.248363 | 2.50E-08 | 454789 |
| Arm fat percentage (right) | rs946185 | 10 | 76423739 | G | A | -0.0105331 | 0.0015693 | 0.5948 | 1.90E-11 | 454789 |
| Arm fat percentage (right) | rs11012732 | 10 | 21830104 | G | A | 0.0145982 | 0.00162665 | 0.331707 | 2.80E-19 | 454789 |
| Arm fat percentage (right) | rs67609008 | 10 | 126640936 | C | T | 0.0115634 | 0.0017049 | 0.283586 | 1.20E-11 | 454789 |
| Arm fat percentage (right) | rs2172131 | 10 | 133978962 | C | T | -0.010172 | 0.00155144 | 0.578565 | 5.50E-11 | 454789 |
| Arm fat percentage (right) | rs4929923 | 11 | 8639200 | C | T | 0.0140363 | 0.00159829 | 0.64521 | 1.60E-18 | 454789 |
| Arm fat percentage (right) | rs474376 | 11 | 30440708 | A | C | 0.0109786 | 0.00188106 | 0.78906 | 5.30E-09 | 454789 |
| Arm fat percentage (right) | rs2234458 | 11 | 65639374 | T | C | -0.0106206 | 0.00159177 | 0.639605 | 2.50E-11 | 454789 |
| Arm fat percentage (right) | rs11222371 | 11 | 130745719 | T | C | 0.012838 | 0.00155715 | 0.409217 | 1.70E-16 | 454789 |
| Arm fat percentage (right) | rs1013402 | 11 | 27712381 | G | A | 0.0210424 | 0.00164078 | 0.318435 | 1.20E-37 | 454789 |
| Arm fat percentage (right) | rs55707359 | 11 | 46159333 | G | T | 0.0391959 | 0.0062864 | 0.015448 | 4.50E-10 | 454789 |
| Arm fat percentage (right) | rs7124681 | 11 | 47529947 | A | C | 0.0236151 | 0.00155343 | 0.408392 | 3.40E-52 | 454789 |
| Arm fat percentage (right) | rs477895 | 11 | 64048912 | T | C | 0.0147005 | 0.00206689 | 0.836499 | 1.10E-12 | 454789 |
| Arm fat percentage (right) | rs7107409 | 11 | 76492195 | T | C | -0.0111688 | 0.00187149 | 0.215341 | 2.40E-09 | 454789 |
| Arm fat percentage (right) | rs12788343 | 11 | 131452912 | C | T | 0.0115459 | 0.00155499 | 0.409216 | 1.10E-13 | 454789 |
| Arm fat percentage (right) | rs61903695 | 11 | 89922417 | G | A | 0.0119507 | 0.00175864 | 0.2549 | 1.10E-11 | 454789 |
| Arm fat percentage (right) | rs35023999 | 11 | 113266411 | C | A | -0.010075 | 0.0015316 | 0.508314 | 4.80E-11 | 454789 |
| Arm fat percentage (right) | rs10892501 | 11 | 119818622 | A | G | -0.00896494 | 0.00157909 | 0.607105 | 1.40E-08 | 454789 |
| Arm fat percentage (right) | rs11223970 | 11 | 134600370 | G | A | 0.0130693 | 0.00206727 | 0.16458 | 2.60E-10 | 454789 |
| Arm fat percentage (right) | rs11030016 | 11 | 27487992 | T | C | 0.013069 | 0.00174818 | 0.739773 | 7.70E-14 | 454789 |
| Arm fat percentage (right) | rs9783304 | 11 | 43660255 | T | G | -0.0168153 | 0.00165465 | 0.689272 | 2.90E-24 | 454789 |
| Arm fat percentage (right) | rs12807357 | 11 | 57656902 | T | C | 0.0103998 | 0.00164993 | 0.315242 | 2.90E-10 | 454789 |
| Arm fat percentage (right) | rs518640 | 11 | 94232883 | T | C | 0.01012 | 0.00164105 | 0.679001 | 7.00E-10 | 454789 |
| Arm fat percentage (right) | rs55769038 | 11 | 13331808 | A | G | 0.0117802 | 0.00155687 | 0.590297 | 3.80E-14 | 454789 |
| Arm fat percentage (right) | rs12367809 | 12 | 50256063 | T | C | 0.0209867 | 0.00159183 | 0.369186 | 1.10E-39 | 454789 |
| Arm fat percentage (right) | rs2292238 | 12 | 56493822 | C | A | -0.00915468 | 0.00155925 | 0.407675 | 4.30E-09 | 454789 |
| Arm fat percentage (right) | rs324014 | 12 | 57510309 | C | T | 0.00868808 | 0.00154215 | 0.45245 | 1.80E-08 | 454789 |
| Arm fat percentage (right) | rs11105842 | 12 | 91243910 | A | G | -0.0101023 | 0.00159498 | 0.367521 | 2.40E-10 | 454789 |
| Arm fat percentage (right) | rs78296744 | 12 | 122479308 | A | G | -0.0119905 | 0.00172185 | 0.272339 | 3.30E-12 | 454789 |
| Arm fat percentage (right) | rs7133378 | 12 | 124409502 | A | G | 0.0185267 | 0.00164436 | 0.31942 | 1.90E-29 | 454789 |
| Arm fat percentage (right) | rs61754230 | 12 | 72179446 | T | C | 0.0305377 | 0.00550326 | 0.019707 | 2.90E-08 | 454789 |
| Arm fat percentage (right) | rs2279574 | 12 | 89745477 | A | C | -0.0142551 | 0.00153345 | 0.541385 | 1.50E-20 | 454789 |
| Arm fat percentage (right) | rs7966251 | 12 | 103731395 | A | G | -0.00983427 | 0.00175844 | 0.25502 | 2.20E-08 | 454789 |
| Arm fat percentage (right) | rs2111281 | 12 | 108165360 | C | A | 0.00951192 | 0.00158914 | 0.366941 | 2.20E-09 | 454789 |
| Arm fat percentage (right) | rs75412871 | 12 | 121709430 | T | C | -0.0211978 | 0.00345333 | 0.051927 | 8.30E-10 | 454789 |
| Arm fat percentage (right) | rs723672 | 12 | 2161561 | T | C | 0.00968127 | 0.00155344 | 0.431522 | 4.60E-10 | 454789 |
| Arm fat percentage (right) | rs55726687 | 12 | 991306 | A | G | 0.0144378 | 0.00187791 | 0.209741 | 1.50E-14 | 454789 |
| Arm fat percentage (right) | rs10505836 | 12 | 19288508 | C | A | 0.0123267 | 0.00222198 | 0.859995 | 2.90E-08 | 454789 |
| Arm fat percentage (right) | rs4762951 | 12 | 20543307 | G | A | -0.0106894 | 0.00184979 | 0.78043 | 7.50E-09 | 454789 |
| Arm fat percentage (right) | rs147819910 | 12 | 39996098 | T | G | 0.033022 | 0.00572461 | 0.018204 | 8.00E-09 | 454789 |
| Arm fat percentage (right) | rs10745787 | 12 | 97592311 | A | G | -0.00922637 | 0.00162396 | 0.668317 | 1.30E-08 | 454789 |
| Arm fat percentage (right) | rs10846920 | 12 | 122943231 | T | C | 0.0163648 | 0.00174778 | 0.739972 | 7.70E-21 | 454789 |
| Arm fat percentage (right) | rs3764002 | 12 | 108618630 | T | C | -0.0146118 | 0.00174089 | 0.261508 | 4.70E-17 | 454789 |
| Arm fat percentage (right) | rs7321331 | 13 | 31015138 | A | G | 0.0104424 | 0.00176057 | 0.742306 | 3.00E-09 | 454789 |
| Arm fat percentage (right) | rs9522183 | 13 | 111977280 | T | G | -0.0102734 | 0.0015541 | 0.56174 | 3.80E-11 | 454789 |
| Arm fat percentage (right) | rs9522279 | 13 | 112221296 | T | C | 0.00936879 | 0.00155415 | 0.423104 | 1.70E-09 | 454789 |
| Arm fat percentage (right) | rs4055791 | 13 | 59266053 | T | C | -0.0108922 | 0.00155465 | 0.416764 | 2.40E-12 | 454789 |
| Arm fat percentage (right) | rs76115890 | 13 | 91993627 | C | T | -0.013558 | 0.00239755 | 0.117891 | 1.60E-08 | 454789 |
| Arm fat percentage (right) | rs9568867 | 13 | 54107352 | A | G | 0.0208511 | 0.0023021 | 0.129184 | 1.30E-19 | 454789 |
| Arm fat percentage (right) | rs1441264 | 13 | 79580919 | A | G | 0.0133437 | 0.00159333 | 0.593692 | 5.50E-17 | 454789 |
| Arm fat percentage (right) | rs9584855 | 13 | 99119000 | G | T | -0.0124681 | 0.00168828 | 0.289058 | 1.50E-13 | 454789 |
| Arm fat percentage (right) | rs1023229 | 13 | 20270925 | A | G | -0.0119467 | 0.00216925 | 0.853914 | 3.60E-08 | 454789 |
| Arm fat percentage (right) | rs56399737 | 13 | 33381721 | T | C | -0.0121198 | 0.00154534 | 0.449163 | 4.40E-15 | 454789 |
| Arm fat percentage (right) | rs9579775 | 13 | 20616557 | C | A | 0.0160521 | 0.00232734 | 0.135543 | 5.30E-12 | 454789 |
| Arm fat percentage (right) | rs17446299 | 13 | 40762556 | G | C | 0.0120902 | 0.00206277 | 0.165547 | 4.60E-09 | 454789 |
| Arm fat percentage (right) | rs56858768 | 13 | 86511730 | A | G | 0.0122288 | 0.00168265 | 0.296903 | 3.70E-13 | 454789 |
| Arm fat percentage (right) | rs61983990 | 14 | 41475003 | A | G | 0.0165123 | 0.00279599 | 0.082492 | 3.50E-09 | 454789 |
| Arm fat percentage (right) | rs10139619 | 14 | 47305486 | G | A | -0.00945746 | 0.00153444 | 0.508028 | 7.10E-10 | 454789 |
| Arm fat percentage (right) | rs12887636 | 14 | 29702590 | G | T | -0.0125985 | 0.00162104 | 0.346494 | 7.70E-15 | 454789 |
| Arm fat percentage (right) | rs12881869 | 14 | 50923249 | T | C | 0.0182658 | 0.00299426 | 0.070529 | 1.10E-09 | 454789 |
| Arm fat percentage (right) | rs8008772 | 14 | 88321884 | T | A | 0.0106705 | 0.00177546 | 0.250475 | 1.90E-09 | 454789 |
| Arm fat percentage (right) | rs3803286 | 14 | 103246470 | G | A | -0.0117433 | 0.00162442 | 0.66675 | 4.90E-13 | 454789 |
| Arm fat percentage (right) | rs217672 | 14 | 62361021 | C | A | 0.0123986 | 0.0017264 | 0.271725 | 6.90E-13 | 454789 |
| Arm fat percentage (right) | rs4430672 | 14 | 63094407 | C | T | -0.0116049 | 0.00192184 | 0.800929 | 1.60E-09 | 454789 |
| Arm fat percentage (right) | rs6575340 | 14 | 94023972 | A | G | 0.0140823 | 0.00159609 | 0.636027 | 1.10E-18 | 454789 |
| Arm fat percentage (right) | rs2239647 | 14 | 33292743 | C | A | -0.0139533 | 0.00154259 | 0.551117 | 1.50E-19 | 454789 |
| Arm fat percentage (right) | rs12890931 | 14 | 69753369 | G | T | 0.0101123 | 0.00160345 | 0.362421 | 2.90E-10 | 454789 |
| Arm fat percentage (right) | rs2370982 | 14 | 79890677 | T | C | 0.0190581 | 0.00188101 | 0.214154 | 4.00E-24 | 454789 |
| Arm fat percentage (right) | rs2765041 | 14 | 103991478 | A | T | -0.0116518 | 0.00168841 | 0.710445 | 5.20E-12 | 454789 |
| Arm fat percentage (right) | rs7171864 | 15 | 73227249 | A | G | 0.0126503 | 0.00162506 | 0.66009 | 7.00E-15 | 454789 |
| Arm fat percentage (right) | rs1657930 | 15 | 57120989 | A | G | -0.0115307 | 0.00192443 | 0.803029 | 2.10E-09 | 454789 |
| Arm fat percentage (right) | rs2119263 | 15 | 66870382 | T | C | -0.0104268 | 0.00183953 | 0.223475 | 1.40E-08 | 454789 |
| Arm fat percentage (right) | rs3784710 | 15 | 68072458 | C | T | -0.0216654 | 0.00182692 | 0.226633 | 1.90E-32 | 454789 |
| Arm fat percentage (right) | rs8031704 | 15 | 84651185 | A | C | 0.012355 | 0.0016349 | 0.327607 | 4.10E-14 | 454789 |
| Arm fat percentage (right) | rs34994596 | 15 | 80991447 | C | T | -0.0113108 | 0.00167594 | 0.297379 | 1.50E-11 | 454789 |
| Arm fat percentage (right) | rs12101393 | 15 | 92570921 | G | C | -0.0110647 | 0.00186633 | 0.217309 | 3.10E-09 | 454789 |
| Arm fat percentage (right) | rs12441543 | 15 | 31689543 | A | G | 0.0101005 | 0.0016967 | 0.287111 | 2.60E-09 | 454789 |
| Arm fat percentage (right) | rs316611 | 15 | 41751678 | T | C | 0.0104311 | 0.00176884 | 0.251319 | 3.70E-09 | 454789 |
| Arm fat percentage (right) | rs35697691 | 15 | 52353498 | G | C | 0.0202386 | 0.00272498 | 0.089406 | 1.10E-13 | 454789 |
| Arm fat percentage (right) | rs2169935 | 15 | 95273039 | T | C | -0.00840088 | 0.00153824 | 0.491696 | 4.70E-08 | 454789 |
| Arm fat percentage (right) | rs72767957 | 15 | 99240793 | G | A | -0.0122436 | 0.00191692 | 0.200136 | 1.70E-10 | 454789 |
| Arm fat percentage (right) | rs56094641 | 16 | 53806453 | G | A | 0.0456522 | 0.00155959 | 0.404645 | 2.40E-188 | 454789 |
| Arm fat percentage (right) | rs35949039 | 16 | 70572605 | T | G | -0.0153811 | 0.00251079 | 0.105573 | 9.00E-10 | 454789 |
| Arm fat percentage (right) | rs811054 | 16 | 72251132 | T | C | 0.0115354 | 0.00154535 | 0.537266 | 8.40E-14 | 454789 |
| Arm fat percentage (right) | rs4887872 | 16 | 76735249 | C | T | 0.0107455 | 0.00194061 | 0.194574 | 3.10E-08 | 454789 |
| Arm fat percentage (right) | rs879620 | 16 | 4015729 | T | C | 0.0160777 | 0.00157669 | 0.613272 | 2.00E-24 | 454789 |
| Arm fat percentage (right) | rs7187776 | 16 | 28857645 | G | A | 0.0241272 | 0.00156036 | 0.401993 | 6.20E-54 | 454789 |
| Arm fat percentage (right) | rs11866219 | 16 | 69549749 | C | A | -0.0191094 | 0.00157325 | 0.583795 | 6.00E-34 | 454789 |
| Arm fat percentage (right) | rs3751859 | 16 | 81735012 | A | G | -0.0138881 | 0.00210662 | 0.156478 | 4.30E-11 | 454789 |
| Arm fat percentage (right) | rs12926311 | 16 | 406427 | C | G | -0.0100612 | 0.00160659 | 0.353553 | 3.80E-10 | 454789 |
| Arm fat percentage (right) | rs28375268 | 16 | 4949528 | T | G | -0.0103978 | 0.00160701 | 0.645125 | 9.80E-11 | 454789 |
| Arm fat percentage (right) | rs2058527 | 16 | 6704749 | G | T | 0.00986094 | 0.00172622 | 0.730584 | 1.10E-08 | 454789 |
| Arm fat percentage (right) | rs11648621 | 16 | 19973008 | G | A | -0.0111767 | 0.00187133 | 0.214852 | 2.30E-09 | 454789 |
| Arm fat percentage (right) | rs56369689 | 16 | 30120308 | G | A | -0.0123395 | 0.00164372 | 0.348604 | 6.00E-14 | 454789 |
| Arm fat percentage (right) | rs34898535 | 16 | 31025641 | T | C | -0.0159011 | 0.00157964 | 0.377903 | 7.80E-24 | 454789 |
| Arm fat percentage (right) | rs2966859 | 16 | 85324544 | G | A | -0.0108616 | 0.00188343 | 0.789009 | 8.10E-09 | 454789 |
| Arm fat percentage (right) | rs8076669 | 17 | 15888448 | C | T | 0.0088507 | 0.0015451 | 0.561564 | 1.00E-08 | 454789 |
| Arm fat percentage (right) | rs1038088 | 17 | 28074563 | G | T | 0.0123791 | 0.00153079 | 0.519315 | 6.10E-16 | 454789 |
| Arm fat percentage (right) | rs17698176 | 17 | 44819595 | G | T | 0.0106297 | 0.00184703 | 0.226632 | 8.70E-09 | 454789 |
| Arm fat percentage (right) | rs7774 | 17 | 4801163 | A | C | 0.0109708 | 0.00166561 | 0.310482 | 4.50E-11 | 454789 |
| Arm fat percentage (right) | rs7223257 | 17 | 61787684 | C | T | 0.00929424 | 0.00162126 | 0.336261 | 9.90E-09 | 454789 |
| Arm fat percentage (right) | rs7218014 | 17 | 65832016 | C | T | 0.0174341 | 0.00192879 | 0.197301 | 1.60E-19 | 454789 |
| Arm fat percentage (right) | rs1320251 | 17 | 21264396 | T | C | -0.00974119 | 0.00154337 | 0.454747 | 2.80E-10 | 454789 |
| Arm fat percentage (right) | rs9908480 | 17 | 79050707 | T | G | 0.00963724 | 0.0015419 | 0.454685 | 4.10E-10 | 454789 |
| Arm fat percentage (right) | rs319788 | 17 | 31531617 | T | C | 0.00924182 | 0.00166414 | 0.696268 | 2.80E-08 | 454789 |
| Arm fat percentage (right) | rs11079849 | 17 | 47090785 | T | C | -0.0159716 | 0.00163443 | 0.328556 | 1.50E-22 | 454789 |
| Arm fat percentage (right) | rs11150745 | 17 | 78757626 | G | A | -0.0133656 | 0.00164823 | 0.317692 | 5.10E-16 | 454789 |
| Arm fat percentage (right) | rs4790841 | 17 | 1835482 | T | C | -0.0204477 | 0.00212852 | 0.154508 | 7.50E-22 | 454789 |
| Arm fat percentage (right) | rs4793085 | 17 | 42320732 | C | A | -0.0124383 | 0.0016199 | 0.656342 | 1.60E-14 | 454789 |
| Arm fat percentage (right) | rs1808579 | 18 | 21104888 | T | C | -0.0145167 | 0.00153492 | 0.482049 | 3.10E-21 | 454789 |
| Arm fat percentage (right) | rs1945160 | 18 | 22164216 | A | G | -0.00927727 | 0.00158836 | 0.37586 | 5.20E-09 | 454789 |
| Arm fat percentage (right) | rs9955276 | 18 | 1839339 | T | C | 0.0149029 | 0.00219034 | 0.144431 | 1.00E-11 | 454789 |
| Arm fat percentage (right) | rs8090017 | 18 | 39911991 | A | G | 0.0100028 | 0.00163192 | 0.334473 | 8.80E-10 | 454789 |
| Arm fat percentage (right) | rs2052607 | 18 | 40788387 | A | G | -0.0134855 | 0.00161739 | 0.343892 | 7.60E-17 | 454789 |
| Arm fat percentage (right) | rs11664106 | 18 | 2846812 | T | A | 0.0096478 | 0.00162279 | 0.373944 | 2.80E-09 | 454789 |
| Arm fat percentage (right) | rs4800754 | 18 | 24243383 | T | A | -0.00887605 | 0.00157338 | 0.611525 | 1.70E-08 | 454789 |
| Arm fat percentage (right) | rs1103804 | 18 | 46636411 | G | A | -0.0108552 | 0.00181301 | 0.766892 | 2.10E-09 | 454789 |
| Arm fat percentage (right) | rs9951619 | 18 | 56882326 | G | T | 0.00997554 | 0.00182499 | 0.767275 | 4.60E-08 | 454789 |
| Arm fat percentage (right) | rs538656 | 18 | 57850422 | T | G | 0.0300779 | 0.00180879 | 0.233829 | 4.30E-62 | 454789 |
| Arm fat percentage (right) | rs7228316 | 18 | 63428272 | A | C | 0.00946291 | 0.00171195 | 0.277883 | 3.20E-08 | 454789 |
| Arm fat percentage (right) | rs1787013 | 18 | 13072979 | C | T | 0.00865155 | 0.00153869 | 0.450724 | 1.90E-08 | 454789 |
| Arm fat percentage (right) | rs11664848 | 18 | 42575661 | G | C | 0.0104257 | 0.00162358 | 0.659623 | 1.40E-10 | 454789 |
| Arm fat percentage (right) | rs57636386 | 18 | 58048295 | C | T | -0.0278968 | 0.00277315 | 0.08384 | 8.30E-24 | 454789 |
| Arm fat percentage (right) | rs8096658 | 18 | 77156537 | G | C | -0.00949415 | 0.00155149 | 0.487495 | 9.40E-10 | 454789 |
| Arm fat percentage (right) | rs8112818 | 19 | 18812785 | G | A | -0.0147263 | 0.00156856 | 0.400377 | 6.10E-21 | 454789 |
| Arm fat percentage (right) | rs10405979 | 19 | 1840267 | G | A | -0.010647 | 0.00190027 | 0.206466 | 2.10E-08 | 454789 |
| Arm fat percentage (right) | rs55714539 | 19 | 18207397 | C | A | 0.0157869 | 0.00162562 | 0.343607 | 2.70E-22 | 454789 |
| Arm fat percentage (right) | rs12459368 | 19 | 18459377 | G | A | -0.0137909 | 0.00172761 | 0.268185 | 1.40E-15 | 454789 |
| Arm fat percentage (right) | rs34331990 | 19 | 30321561 | G | T | 0.0108282 | 0.0015617 | 0.41875 | 4.10E-12 | 454789 |
| Arm fat percentage (right) | rs56356382 | 19 | 4064057 | C | T | -0.0163725 | 0.00195201 | 0.192338 | 5.00E-17 | 454789 |
| Arm fat percentage (right) | rs12975415 | 19 | 5174025 | G | A | -0.0119974 | 0.00204527 | 0.171165 | 4.50E-09 | 454789 |
| Arm fat percentage (right) | rs10423928 | 19 | 46182304 | A | T | -0.0220794 | 0.00193334 | 0.194427 | 3.30E-30 | 454789 |
| Arm fat percentage (right) | rs10402950 | 19 | 33935675 | C | T | 0.0162923 | 0.00169255 | 0.289352 | 6.20E-22 | 454789 |
| Arm fat percentage (right) | rs429358 | 19 | 45411941 | C | T | -0.0192068 | 0.00212406 | 0.154046 | 1.50E-19 | 454789 |
| Arm fat percentage (right) | rs9304665 | 19 | 47602577 | A | T | 0.0133029 | 0.00180769 | 0.76364 | 1.90E-13 | 454789 |
| Arm fat percentage (right) | rs2326844 | 20 | 6628406 | C | G | 0.0141508 | 0.00159332 | 0.634235 | 6.60E-19 | 454789 |
| Arm fat percentage (right) | rs56218501 | 20 | 46365636 | T | C | -0.0120066 | 0.00187421 | 0.21181 | 1.50E-10 | 454789 |
| Arm fat percentage (right) | rs6021948 | 20 | 51100420 | A | T | -0.0118982 | 0.00164381 | 0.321773 | 4.50E-13 | 454789 |
| Arm fat percentage (right) | rs8118253 | 20 | 15819926 | A | T | 0.0126024 | 0.00227219 | 0.131606 | 2.90E-08 | 454789 |
| Arm fat percentage (right) | rs6023655 | 20 | 53479658 | G | A | -0.0100981 | 0.00181869 | 0.765799 | 2.80E-08 | 454789 |
| Arm fat percentage (right) | rs11699828 | 20 | 62157198 | A | G | -0.0263719 | 0.00450941 | 0.035831 | 5.00E-09 | 454789 |
| Arm fat percentage (right) | rs112852122 | 20 | 47498117 | A | G | -0.0174076 | 0.00213483 | 0.157856 | 3.50E-16 | 454789 |
| Arm fat percentage (right) | rs6044084 | 20 | 16516264 | G | A | 0.00881235 | 0.00156004 | 0.586913 | 1.60E-08 | 454789 |
| Arm fat percentage (right) | rs6138536 | 20 | 25182648 | G | A | 0.0112564 | 0.00153757 | 0.462462 | 2.50E-13 | 454789 |
| Arm fat percentage (right) | rs6103254 | 20 | 41990761 | C | T | -0.0139389 | 0.00231193 | 0.126697 | 1.60E-09 | 454789 |
| Arm fat percentage (right) | rs74618095 | 21 | 40683196 | C | T | 0.0115911 | 0.00211627 | 0.157984 | 4.30E-08 | 454789 |
| Arm fat percentage (right) | rs400997 | 21 | 46564154 | A | T | 0.0130854 | 0.00155516 | 0.559372 | 4.00E-17 | 454789 |
| Arm fat percentage (right) | rs17193211 | 21 | 38885506 | T | C | -0.0178038 | 0.00312285 | 0.066795 | 1.20E-08 | 454789 |
| Arm fat percentage (right) | rs8132491 | 21 | 40288577 | A | G | -0.010175 | 0.00169727 | 0.312987 | 2.00E-09 | 454789 |
| Arm fat percentage (right) | rs4820323 | 22 | 38599767 | G | C | -0.0137244 | 0.00155733 | 0.580959 | 1.20E-18 | 454789 |
| Arm fat percentage (right) | rs12628603 | 22 | 38119213 | A | G | -0.009741 | 0.00157954 | 0.617031 | 7.00E-10 | 454789 |
| Arm fat percentage (right) | rs10854853 | 22 | 48874412 | T | G | 0.0100313 | 0.00153961 | 0.456803 | 7.20E-11 | 454789 |

**Table S2.E Summary of the SNPs (after clumping process) associated with fat-free mass of left arm (per SD increase)**

| **exposure** | **SNP** | **chromosome** | **position** | **effect_allele** | **other_allele** | **beta** | **se** | **eaf** | **pval** | **samplesize** |
| --- | --- | --- | --- | --- | --- | --- | --- | --- | --- | --- |
| Arm fat-free mass (left) | rs56333749 | 1 | 9354520 | A | C | -0.00920524 | 0.00154618 | 0.208371 | 2.60E-09 | 454672 |
| Arm fat-free mass (left) | rs3765351 | 1 | 22445991 | T | C | -0.00766086 | 0.00125872 | 0.541394 | 1.20E-09 | 454672 |
| Arm fat-free mass (left) | rs72660086 | 1 | 39571992 | G | T | 0.0108866 | 0.00154147 | 0.211407 | 1.60E-12 | 454672 |
| Arm fat-free mass (left) | rs1229947 | 1 | 56597724 | C | T | 0.0119519 | 0.00149058 | 0.231688 | 1.10E-15 | 454672 |
| Arm fat-free mass (left) | rs12140153 | 1 | 62579891 | T | G | -0.0172455 | 0.00220241 | 0.094284 | 4.90E-15 | 454672 |
| Arm fat-free mass (left) | rs56795609 | 1 | 111208718 | T | A | -0.00985009 | 0.00166613 | 0.173464 | 3.40E-09 | 454672 |
| Arm fat-free mass (left) | rs655598 | 1 | 190287713 | A | G | -0.0087871 | 0.00126468 | 0.563188 | 3.70E-12 | 454672 |
| Arm fat-free mass (left) | rs6693481 | 1 | 203766395 | C | T | -0.0079747 | 0.00136748 | 0.695149 | 5.50E-09 | 454672 |
| Arm fat-free mass (left) | rs2970592 | 1 | 212220847 | A | G | 0.00811686 | 0.0012733 | 0.588423 | 1.80E-10 | 454672 |
| Arm fat-free mass (left) | rs12072845 | 1 | 214630757 | A | G | -0.0128834 | 0.00128542 | 0.394686 | 1.20E-23 | 454672 |
| Arm fat-free mass (left) | rs41277186 | 1 | 214776830 | G | C | -0.016333 | 0.00284793 | 0.051275 | 9.70E-09 | 454672 |
| Arm fat-free mass (left) | rs12073468 | 1 | 225566546 | T | C | 0.0107131 | 0.00149696 | 0.228158 | 8.30E-13 | 454672 |
| Arm fat-free mass (left) | rs417237 | 1 | 228532195 | T | G | -0.00850977 | 0.0012924 | 0.617155 | 4.60E-11 | 454672 |
| Arm fat-free mass (left) | rs2295363 | 1 | 1850428 | G | A | 0.0103607 | 0.00126497 | 0.547668 | 2.60E-16 | 454672 |
| Arm fat-free mass (left) | rs226250 | 1 | 8022171 | T | C | -0.00821022 | 0.00128244 | 0.406372 | 1.50E-10 | 454672 |
| Arm fat-free mass (left) | rs112750178 | 1 | 26859695 | C | T | -0.00925564 | 0.00147802 | 0.238081 | 3.80E-10 | 454672 |
| Arm fat-free mass (left) | rs10798945 | 1 | 33858873 | T | C | 0.0113979 | 0.0014548 | 0.751343 | 4.70E-15 | 454672 |
| Arm fat-free mass (left) | rs28605759 | 1 | 38399816 | A | G | -0.007363 | 0.00126014 | 0.454331 | 5.10E-09 | 454672 |
| Arm fat-free mass (left) | rs12090545 | 1 | 51193984 | G | A | 0.0190215 | 0.00219481 | 0.089748 | 4.50E-18 | 454672 |
| Arm fat-free mass (left) | rs12726084 | 1 | 72649154 | T | C | -0.013231 | 0.00155595 | 0.203905 | 1.80E-17 | 454672 |
| Arm fat-free mass (left) | rs12035149 | 1 | 107885018 | G | C | 0.00964039 | 0.00153331 | 0.213626 | 3.20E-10 | 454672 |
| Arm fat-free mass (left) | rs10749659 | 1 | 151033979 | T | C | -0.00971908 | 0.00149822 | 0.772425 | 8.80E-11 | 454672 |
| Arm fat-free mass (left) | rs1022523 | 1 | 176788394 | A | G | 0.0154012 | 0.00141152 | 0.726869 | 1.00E-27 | 454672 |
| Arm fat-free mass (left) | rs12731187 | 1 | 202013757 | T | C | -0.00798788 | 0.00132283 | 0.358148 | 1.60E-09 | 454672 |
| Arm fat-free mass (left) | rs903908 | 1 | 2202967 | C | T | 0.00850304 | 0.00126164 | 0.509441 | 1.60E-11 | 454672 |
| Arm fat-free mass (left) | rs1205593 | 1 | 11252716 | C | T | -0.0139514 | 0.00147086 | 0.759347 | 2.40E-21 | 454672 |
| Arm fat-free mass (left) | rs2885697 | 1 | 41544279 | T | G | -0.0182747 | 0.00132901 | 0.665233 | 5.00E-43 | 454672 |
| Arm fat-free mass (left) | rs4926542 | 1 | 50263773 | T | C | -0.0106274 | 0.00135707 | 0.68212 | 4.80E-15 | 454672 |
| Arm fat-free mass (left) | rs34517439 | 1 | 78450517 | A | C | 0.0353802 | 0.00194343 | 0.121688 | 4.70E-74 | 454672 |
| Arm fat-free mass (left) | rs12731454 | 1 | 97067652 | G | A | 0.0110362 | 0.00136435 | 0.309226 | 6.00E-16 | 454672 |
| Arm fat-free mass (left) | rs60804050 | 1 | 118870373 | A | G | -0.00963781 | 0.00143679 | 0.255874 | 2.00E-11 | 454672 |
| Arm fat-free mass (left) | rs7513326 | 1 | 159895536 | A | G | -0.0070109 | 0.0012772 | 0.508353 | 4.00E-08 | 454672 |
| Arm fat-free mass (left) | rs17277008 | 1 | 172105162 | C | T | 0.0141406 | 0.00135276 | 0.313438 | 1.40E-25 | 454672 |
| Arm fat-free mass (left) | rs7535501 | 1 | 176462695 | T | C | -0.0157115 | 0.00273369 | 0.943945 | 9.10E-09 | 454672 |
| Arm fat-free mass (left) | rs11240565 | 1 | 205722958 | T | C | 0.011295 | 0.00128107 | 0.39837 | 1.20E-18 | 454672 |
| Arm fat-free mass (left) | rs212526 | 1 | 21584941 | C | T | 0.00936561 | 0.00128204 | 0.600784 | 2.80E-13 | 454672 |
| Arm fat-free mass (left) | rs11578046 | 1 | 23425139 | A | G | -0.0115515 | 0.00133904 | 0.326581 | 6.30E-18 | 454672 |
| Arm fat-free mass (left) | rs148981711 | 1 | 32748063 | G | A | 0.0229055 | 0.00368367 | 0.030302 | 5.00E-10 | 454672 |
| Arm fat-free mass (left) | rs2678204 | 1 | 201800511 | G | T | 0.0129462 | 0.00132553 | 0.340184 | 1.60E-22 | 454672 |
| Arm fat-free mass (left) | rs3753614 | 1 | 32081785 | A | G | 0.0103479 | 0.00127242 | 0.563269 | 4.20E-16 | 454672 |
| Arm fat-free mass (left) | rs953567 | 1 | 74977425 | G | A | 0.00822657 | 0.00129047 | 0.398471 | 1.80E-10 | 454672 |
| Arm fat-free mass (left) | rs17363646 | 1 | 86823503 | G | A | 0.0122518 | 0.00183059 | 0.135708 | 2.20E-11 | 454672 |
| Arm fat-free mass (left) | rs76798800 | 1 | 154994978 | T | G | 0.0200555 | 0.00142305 | 0.265999 | 4.20E-45 | 454672 |
| Arm fat-free mass (left) | rs574367 | 1 | 177873210 | T | G | 0.0255679 | 0.00154344 | 0.209128 | 1.20E-61 | 454672 |
| Arm fat-free mass (left) | rs11580196 | 1 | 227955276 | G | A | -0.00978753 | 0.00167418 | 0.170358 | 5.00E-09 | 454672 |
| Arm fat-free mass (left) | rs1260326 | 2 | 27730940 | C | T | 0.0176506 | 0.00128228 | 0.604212 | 4.10E-43 | 454672 |
| Arm fat-free mass (left) | rs1437377 | 2 | 100744924 | G | T | 0.0122038 | 0.0018468 | 0.133658 | 3.90E-11 | 454672 |
| Arm fat-free mass (left) | rs7601000 | 2 | 242610773 | A | T | -0.0102372 | 0.0014948 | 0.767346 | 7.50E-12 | 454672 |
| Arm fat-free mass (left) | rs77165542 | 2 | 430975 | T | C | -0.053417 | 0.00343423 | 0.035481 | 1.50E-54 | 454672 |
| Arm fat-free mass (left) | rs115179432 | 2 | 33348679 | G | A | -0.0221681 | 0.00244293 | 0.071972 | 1.10E-19 | 454672 |
| Arm fat-free mass (left) | rs11545482 | 2 | 70315987 | T | C | -0.0301541 | 0.00443081 | 0.02045 | 1.00E-11 | 454672 |
| Arm fat-free mass (left) | rs3771382 | 2 | 71559445 | G | C | -0.0103515 | 0.00127029 | 0.57112 | 3.70E-16 | 454672 |
| Arm fat-free mass (left) | rs72845162 | 2 | 128874657 | A | T | 0.00890385 | 0.00157736 | 0.198715 | 1.70E-08 | 454672 |
| Arm fat-free mass (left) | rs1047891 | 2 | 211540507 | A | C | 0.0163917 | 0.00134946 | 0.315866 | 6.00E-34 | 454672 |
| Arm fat-free mass (left) | rs13430869 | 2 | 218146818 | T | G | 0.0124368 | 0.00143594 | 0.741804 | 4.70E-18 | 454672 |
| Arm fat-free mass (left) | rs2197563 | 2 | 233687080 | A | G | 0.00930074 | 0.00128071 | 0.594857 | 3.80E-13 | 454672 |
| Arm fat-free mass (left) | rs6721191 | 2 | 10190115 | G | A | -0.00729862 | 0.00127128 | 0.577899 | 9.40E-09 | 454672 |
| Arm fat-free mass (left) | rs112544217 | 2 | 20222686 | T | C | -0.0242188 | 0.00437158 | 0.022147 | 3.00E-08 | 454672 |
| Arm fat-free mass (left) | rs343954 | 2 | 44999709 | C | T | 0.0124265 | 0.00167553 | 0.171756 | 1.20E-13 | 454672 |
| Arm fat-free mass (left) | rs76733024 | 2 | 46995516 | G | A | -0.0144351 | 0.00254894 | 0.065149 | 1.50E-08 | 454672 |
| Arm fat-free mass (left) | rs17049820 | 2 | 59139507 | C | T | -0.0114139 | 0.0019981 | 0.112982 | 1.10E-08 | 454672 |
| Arm fat-free mass (left) | rs1374370 | 2 | 85818273 | A | G | 0.00927058 | 0.00136414 | 0.305256 | 1.10E-11 | 454672 |
| Arm fat-free mass (left) | rs11680549 | 2 | 88926348 | C | G | 0.00887449 | 0.00139776 | 0.279694 | 2.20E-10 | 454672 |
| Arm fat-free mass (left) | rs1837367 | 2 | 111874551 | A | G | 0.0071344 | 0.00126254 | 0.482839 | 1.60E-08 | 454672 |
| Arm fat-free mass (left) | rs10188231 | 2 | 142297493 | G | C | -0.0100211 | 0.00161448 | 0.185786 | 5.40E-10 | 454672 |
| Arm fat-free mass (left) | rs2140046 | 2 | 169706079 | C | T | -0.0119021 | 0.00130563 | 0.363508 | 7.80E-20 | 454672 |
| Arm fat-free mass (left) | rs72885917 | 2 | 172416376 | C | A | -0.0181909 | 0.00145327 | 0.247471 | 6.00E-36 | 454672 |
| Arm fat-free mass (left) | rs116337081 | 2 | 183954625 | T | C | 0.0135029 | 0.00246575 | 0.070078 | 4.30E-08 | 454672 |
| Arm fat-free mass (left) | rs12694042 | 2 | 207029825 | T | C | -0.00888485 | 0.0012609 | 0.501747 | 1.80E-12 | 454672 |
| Arm fat-free mass (left) | rs1542224 | 2 | 223963874 | C | T | 0.0107149 | 0.00139867 | 0.718938 | 1.80E-14 | 454672 |
| Arm fat-free mass (left) | rs3116201 | 2 | 233074205 | A | G | -0.0172242 | 0.00211588 | 0.09785 | 3.90E-16 | 454672 |
| Arm fat-free mass (left) | rs6743060 | 2 | 629510 | A | C | 0.0331574 | 0.00166484 | 0.82831 | 2.90E-88 | 454672 |
| Arm fat-free mass (left) | rs2372604 | 2 | 36820390 | T | G | 0.00830919 | 0.00131944 | 0.380328 | 3.00E-10 | 454672 |
| Arm fat-free mass (left) | rs222478 | 2 | 42656919 | A | C | -0.0154198 | 0.00187133 | 0.130337 | 1.70E-16 | 454672 |
| Arm fat-free mass (left) | rs17400325 | 2 | 178565913 | C | T | 0.0197645 | 0.0031433 | 0.041569 | 3.20E-10 | 454672 |
| Arm fat-free mass (left) | rs10803955 | 2 | 183228114 | G | A | -0.0108316 | 0.00125379 | 0.507648 | 5.70E-18 | 454672 |
| Arm fat-free mass (left) | rs1064213 | 2 | 198950240 | A | G | 0.0123378 | 0.00125663 | 0.478359 | 9.40E-23 | 454672 |
| Arm fat-free mass (left) | rs34756249 | 2 | 218279486 | C | T | 0.0161358 | 0.00135314 | 0.684096 | 8.80E-33 | 454672 |
| Arm fat-free mass (left) | rs11684531 | 2 | 219835489 | G | A | -0.0102633 | 0.00184946 | 0.132776 | 2.90E-08 | 454672 |
| Arm fat-free mass (left) | rs7592897 | 2 | 227263582 | T | C | 0.0121 | 0.00136669 | 0.304309 | 8.50E-19 | 454672 |
| Arm fat-free mass (left) | rs12713004 | 2 | 23896049 | G | A | 0.0155811 | 0.00140747 | 0.724932 | 1.70E-28 | 454672 |
| Arm fat-free mass (left) | rs59985551 | 2 | 56106928 | T | C | -0.0142584 | 0.00149942 | 0.226248 | 1.90E-21 | 454672 |
| Arm fat-free mass (left) | rs7581335 | 2 | 143958864 | T | A | 0.0122062 | 0.00180635 | 0.140547 | 1.40E-11 | 454672 |
| Arm fat-free mass (left) | rs17443541 | 2 | 200402624 | C | T | -0.0109536 | 0.00161873 | 0.189379 | 1.30E-11 | 454672 |
| Arm fat-free mass (left) | rs2270894 | 3 | 9975386 | G | C | -0.0141739 | 0.00162215 | 0.203279 | 2.40E-18 | 454672 |
| Arm fat-free mass (left) | rs2600223 | 3 | 12934932 | G | A | -0.0075521 | 0.00135698 | 0.683391 | 2.60E-08 | 454672 |
| Arm fat-free mass (left) | rs6779752 | 3 | 85663849 | A | G | -0.0130567 | 0.00131762 | 0.6376 | 3.80E-23 | 454672 |
| Arm fat-free mass (left) | rs4858940 | 3 | 88254820 | C | T | 0.0163064 | 0.00197477 | 0.885531 | 1.50E-16 | 454672 |
| Arm fat-free mass (left) | rs4635681 | 3 | 152310614 | G | A | 0.011081 | 0.00173071 | 0.156254 | 1.50E-10 | 454672 |
| Arm fat-free mass (left) | rs10936684 | 3 | 171130793 | A | G | -0.00831624 | 0.0013397 | 0.659823 | 5.40E-10 | 454672 |
| Arm fat-free mass (left) | rs62246311 | 3 | 9498143 | A | G | 0.0126709 | 0.00207421 | 0.102323 | 1.00E-09 | 454672 |
| Arm fat-free mass (left) | rs10084690 | 3 | 33591384 | C | A | 0.0207141 | 0.00341572 | 0.035274 | 1.30E-09 | 454672 |
| Arm fat-free mass (left) | rs6792892 | 3 | 49995518 | C | T | 0.0148314 | 0.00125897 | 0.530736 | 4.90E-32 | 454672 |
| Arm fat-free mass (left) | rs11925245 | 3 | 114183579 | G | A | -0.0101666 | 0.00164414 | 0.182855 | 6.30E-10 | 454672 |
| Arm fat-free mass (left) | rs7632381 | 3 | 141106063 | C | T | 0.0277218 | 0.00126403 | 0.444334 | 1.30E-106 | 454672 |
| Arm fat-free mass (left) | rs1092403 | 3 | 153926744 | T | C | 0.0095909 | 0.00126515 | 0.537822 | 3.40E-14 | 454672 |
| Arm fat-free mass (left) | rs509035 | 3 | 172163449 | A | G | 0.0157306 | 0.00135209 | 0.31561 | 2.80E-31 | 454672 |
| Arm fat-free mass (left) | rs73175572 | 3 | 185490184 | G | A | 0.0250537 | 0.00201705 | 0.111717 | 2.00E-35 | 454672 |
| Arm fat-free mass (left) | rs73052033 | 3 | 185828465 | C | T | -0.0158903 | 0.00162195 | 0.185073 | 1.20E-22 | 454672 |
| Arm fat-free mass (left) | rs7619139 | 3 | 25110415 | A | T | 0.0102666 | 0.00128108 | 0.588652 | 1.10E-15 | 454672 |
| Arm fat-free mass (left) | rs3749387 | 3 | 38496193 | C | G | 0.0114901 | 0.00126907 | 0.530073 | 1.40E-19 | 454672 |
| Arm fat-free mass (left) | rs75451531 | 3 | 61187422 | T | C | -0.0134212 | 0.001777 | 0.14654 | 4.30E-14 | 454672 |
| Arm fat-free mass (left) | rs6762851 | 3 | 56686329 | C | T | -0.0111864 | 0.00131244 | 0.357373 | 1.50E-17 | 454672 |
| Arm fat-free mass (left) | rs6769617 | 3 | 62687746 | T | A | -0.00861612 | 0.00133134 | 0.663986 | 9.70E-11 | 454672 |
| Arm fat-free mass (left) | rs4677150 | 3 | 72393982 | G | C | -0.007726 | 0.00126425 | 0.50416 | 9.90E-10 | 454672 |
| Arm fat-free mass (left) | rs7633464 | 3 | 98715823 | A | G | 0.00911973 | 0.00125814 | 0.47832 | 4.20E-13 | 454672 |
| Arm fat-free mass (left) | rs6762578 | 3 | 128992047 | A | G | 0.013856 | 0.0015203 | 0.7784 | 7.90E-20 | 454672 |
| Arm fat-free mass (left) | rs2651316 | 3 | 147059334 | A | G | -0.00857613 | 0.00146189 | 0.753302 | 4.50E-09 | 454672 |
| Arm fat-free mass (left) | rs9790159 | 3 | 171908032 | G | A | -0.00998703 | 0.00127917 | 0.53045 | 5.80E-15 | 454672 |
| Arm fat-free mass (left) | rs843374 | 3 | 183997261 | T | A | -0.00953691 | 0.00127805 | 0.587167 | 8.50E-14 | 454672 |
| Arm fat-free mass (left) | rs4076108 | 3 | 13736088 | T | A | 0.00833053 | 0.00146759 | 0.244807 | 1.40E-08 | 454672 |
| Arm fat-free mass (left) | rs9680881 | 3 | 93526697 | A | G | -0.00774659 | 0.00141854 | 0.297164 | 4.70E-08 | 454672 |
| Arm fat-free mass (left) | rs11709402 | 3 | 131551027 | G | A | 0.00992925 | 0.00140728 | 0.278619 | 1.70E-12 | 454672 |
| Arm fat-free mass (left) | rs113061374 | 4 | 1052662 | T | C | -0.0230181 | 0.00296097 | 0.047693 | 7.60E-15 | 454672 |
| Arm fat-free mass (left) | rs981002 | 4 | 12881731 | A | T | -0.0105474 | 0.00142274 | 0.267094 | 1.20E-13 | 454672 |
| Arm fat-free mass (left) | rs9985795 | 4 | 135213286 | C | T | -0.00725373 | 0.00126236 | 0.482759 | 9.10E-09 | 454672 |
| Arm fat-free mass (left) | rs10516169 | 4 | 4935309 | G | T | 0.00881773 | 0.00130554 | 0.378384 | 1.40E-11 | 454672 |
| Arm fat-free mass (left) | rs7671110 | 4 | 17874089 | T | C | -0.027865 | 0.00172169 | 0.158095 | 6.50E-59 | 454672 |
| Arm fat-free mass (left) | rs10938397 | 4 | 45182527 | G | A | 0.0128723 | 0.00127089 | 0.434294 | 4.10E-24 | 454672 |
| Arm fat-free mass (left) | rs10222924 | 4 | 49016761 | G | A | -0.00967712 | 0.00137678 | 0.69935 | 2.10E-12 | 454672 |
| Arm fat-free mass (left) | rs1841738 | 4 | 88557753 | G | A | -0.0109059 | 0.00126613 | 0.518118 | 7.10E-18 | 454672 |
| Arm fat-free mass (left) | rs2101975 | 4 | 106216667 | G | A | -0.0145042 | 0.00127389 | 0.432211 | 4.90E-30 | 454672 |
| Arm fat-free mass (left) | rs6824633 | 4 | 111019965 | T | C | 0.00769579 | 0.00131835 | 0.353404 | 5.30E-09 | 454672 |
| Arm fat-free mass (left) | rs11098675 | 4 | 123832776 | G | A | -0.014461 | 0.00159005 | 0.806232 | 9.50E-20 | 454672 |
| Arm fat-free mass (left) | rs111598585 | 4 | 171635471 | T | C | -0.00858141 | 0.00155308 | 0.208538 | 3.30E-08 | 454672 |
| Arm fat-free mass (left) | rs10939792 | 4 | 18483405 | G | C | 0.00745886 | 0.00134833 | 0.320239 | 3.20E-08 | 454672 |
| Arm fat-free mass (left) | rs4596205 | 4 | 31012310 | T | C | 0.00969918 | 0.00132188 | 0.349332 | 2.20E-13 | 454672 |
| Arm fat-free mass (left) | rs6554194 | 4 | 55499810 | G | T | -0.00709958 | 0.00126441 | 0.555705 | 2.00E-08 | 454672 |
| Arm fat-free mass (left) | rs10020631 | 4 | 69353863 | A | G | -0.00849338 | 0.00146323 | 0.248004 | 6.50E-09 | 454672 |
| Arm fat-free mass (left) | rs17556750 | 4 | 82155568 | A | C | 0.0121184 | 0.00138913 | 0.288357 | 2.70E-18 | 454672 |
| Arm fat-free mass (left) | rs4240326 | 4 | 145839264 | G | A | -0.0199556 | 0.00126395 | 0.550144 | 3.70E-56 | 454672 |
| Arm fat-free mass (left) | rs7683836 | 4 | 180167906 | A | G | -0.00704646 | 0.00127021 | 0.557265 | 2.90E-08 | 454672 |
| Arm fat-free mass (left) | rs4865465 | 4 | 1745486 | A | G | 0.0080509 | 0.00125839 | 0.534723 | 1.60E-10 | 454672 |
| Arm fat-free mass (left) | rs73213484 | 4 | 28489339 | T | A | -0.0130823 | 0.00180742 | 0.141231 | 4.60E-13 | 454672 |
| Arm fat-free mass (left) | rs1296328 | 4 | 137083193 | C | A | -0.0088956 | 0.0012732 | 0.558992 | 2.80E-12 | 454672 |
| Arm fat-free mass (left) | rs10434434 | 4 | 54271611 | C | A | -0.0144715 | 0.00177754 | 0.14802 | 3.90E-16 | 454672 |
| Arm fat-free mass (left) | rs140493137 | 4 | 87666916 | A | G | 0.0184551 | 0.00265953 | 0.060122 | 3.90E-12 | 454672 |
| Arm fat-free mass (left) | rs11097755 | 4 | 102709308 | C | T | 0.00824409 | 0.00126576 | 0.443067 | 7.40E-11 | 454672 |
| Arm fat-free mass (left) | rs6821305 | 4 | 122713863 | C | A | 0.0121614 | 0.00128396 | 0.399251 | 2.80E-21 | 454672 |
| Arm fat-free mass (left) | rs36089326 | 4 | 160028812 | T | A | 0.00919301 | 0.00134029 | 0.327036 | 6.90E-12 | 454672 |
| Arm fat-free mass (left) | rs62372052 | 5 | 42724294 | G | A | 0.025362 | 0.00201703 | 0.110094 | 2.90E-36 | 454672 |
| Arm fat-free mass (left) | rs1582931 | 5 | 122657199 | A | G | -0.0169562 | 0.00127085 | 0.47325 | 1.30E-40 | 454672 |
| Arm fat-free mass (left) | rs9327336 | 5 | 123990270 | C | T | 0.00864305 | 0.00132466 | 0.343079 | 6.80E-11 | 454672 |
| Arm fat-free mass (left) | rs247008 | 5 | 131447104 | G | A | 0.011352 | 0.00134679 | 0.670447 | 3.50E-17 | 454672 |
| Arm fat-free mass (left) | rs33967909 | 5 | 137603293 | A | G | 0.0119483 | 0.00152915 | 0.216041 | 5.60E-15 | 454672 |
| Arm fat-free mass (left) | rs6867471 | 5 | 3574564 | T | C | -0.00773937 | 0.00130889 | 0.362376 | 3.40E-09 | 454672 |
| Arm fat-free mass (left) | rs6450346 | 5 | 55014771 | C | T | -0.0107336 | 0.00137553 | 0.701333 | 6.00E-15 | 454672 |
| Arm fat-free mass (left) | rs12188627 | 5 | 60720682 | G | A | -0.00943167 | 0.00125851 | 0.487753 | 6.70E-14 | 454672 |
| Arm fat-free mass (left) | rs9291926 | 5 | 67599656 | G | T | -0.0120405 | 0.00126171 | 0.531819 | 1.40E-21 | 454672 |
| Arm fat-free mass (left) | rs4588572 | 5 | 77631634 | G | A | 0.00942839 | 0.00150052 | 0.227734 | 3.30E-10 | 454672 |
| Arm fat-free mass (left) | rs61749613 | 5 | 82815170 | G | A | 0.0245381 | 0.00315398 | 0.04139 | 7.20E-15 | 454672 |
| Arm fat-free mass (left) | rs35267052 | 5 | 87949118 | G | T | 0.0141376 | 0.00207285 | 0.103005 | 9.10E-12 | 454672 |
| Arm fat-free mass (left) | rs13173394 | 5 | 161385636 | C | T | 0.00796338 | 0.00130485 | 0.631008 | 1.00E-09 | 454672 |
| Arm fat-free mass (left) | rs111365325 | 5 | 170865229 | T | C | -0.0125581 | 0.00149452 | 0.231328 | 4.40E-17 | 454672 |
| Arm fat-free mass (left) | rs55758152 | 5 | 171317318 | A | G | 0.0088196 | 0.001358 | 0.325975 | 8.30E-11 | 454672 |
| Arm fat-free mass (left) | rs252938 | 5 | 5496480 | T | C | -0.00848354 | 0.0013301 | 0.648991 | 1.80E-10 | 454672 |
| Arm fat-free mass (left) | rs7731023 | 5 | 36181627 | G | A | 0.00704215 | 0.00127129 | 0.574357 | 3.00E-08 | 454672 |
| Arm fat-free mass (left) | rs365352 | 5 | 77401152 | A | G | -0.0129682 | 0.00146105 | 0.244459 | 6.90E-19 | 454672 |
| Arm fat-free mass (left) | rs10515237 | 5 | 95751549 | G | A | 0.0131199 | 0.00139919 | 0.281867 | 6.80E-21 | 454672 |
| Arm fat-free mass (left) | rs2952615 | 5 | 112138888 | C | G | -0.0117842 | 0.00129554 | 0.617529 | 9.40E-20 | 454672 |
| Arm fat-free mass (left) | rs17115481 | 5 | 153358226 | A | G | -0.00914072 | 0.00142027 | 0.269711 | 1.20E-10 | 454672 |
| Arm fat-free mass (left) | rs4282339 | 5 | 168256240 | A | G | -0.0180364 | 0.00154767 | 0.207607 | 2.20E-31 | 454672 |
| Arm fat-free mass (left) | rs1990657 | 5 | 171220503 | C | T | -0.0079438 | 0.00127368 | 0.428363 | 4.50E-10 | 454672 |
| Arm fat-free mass (left) | rs12657771 | 5 | 36787962 | A | G | -0.0109593 | 0.00127385 | 0.438675 | 7.70E-18 | 454672 |
| Arm fat-free mass (left) | rs2307111 | 5 | 75003678 | C | T | -0.0171215 | 0.00128769 | 0.395091 | 2.40E-40 | 454672 |
| Arm fat-free mass (left) | rs7442885 | 5 | 87682877 | G | C | -0.0165185 | 0.00153613 | 0.214122 | 5.70E-27 | 454672 |
| Arm fat-free mass (left) | rs6874142 | 5 | 172753555 | G | T | 0.0160598 | 0.00209746 | 0.113715 | 1.90E-14 | 454672 |
| Arm fat-free mass (left) | rs244711 | 5 | 176509193 | T | C | 0.0168332 | 0.0014544 | 0.685811 | 5.60E-31 | 454672 |
| Arm fat-free mass (left) | rs11739036 | 5 | 32723478 | A | G | -0.0108807 | 0.0013686 | 0.342497 | 1.90E-15 | 454672 |
| Arm fat-free mass (left) | rs6898801 | 5 | 111250615 | G | A | -0.00927677 | 0.00133136 | 0.657823 | 3.20E-12 | 454672 |
| Arm fat-free mass (left) | rs3822742 | 5 | 139059017 | A | C | 0.0127817 | 0.00130572 | 0.371022 | 1.30E-22 | 454672 |
| Arm fat-free mass (left) | rs12213070 | 6 | 12131542 | A | G | -0.00811782 | 0.00131969 | 0.346307 | 7.70E-10 | 454672 |
| Arm fat-free mass (left) | rs12209223 | 6 | 76164589 | A | C | 0.0150527 | 0.00209154 | 0.10131 | 6.20E-13 | 454672 |
| Arm fat-free mass (left) | rs4946936 | 6 | 109003321 | C | T | 0.0221491 | 0.00140022 | 0.712573 | 2.30E-56 | 454672 |
| Arm fat-free mass (left) | rs7755185 | 6 | 152339615 | G | A | 0.00752679 | 0.00135855 | 0.311117 | 3.00E-08 | 454672 |
| Arm fat-free mass (left) | rs9379084 | 6 | 7231843 | A | G | -0.0149431 | 0.00202488 | 0.115559 | 1.60E-13 | 454672 |
| Arm fat-free mass (left) | rs62396185 | 6 | 26180634 | C | G | -0.0208856 | 0.00143311 | 0.260014 | 4.10E-48 | 454672 |
| Arm fat-free mass (left) | rs1150780 | 6 | 34215228 | A | G | -0.00808516 | 0.00143636 | 0.256738 | 1.80E-08 | 454672 |
| Arm fat-free mass (left) | rs2395792 | 6 | 41852187 | G | T | -0.0270992 | 0.00312207 | 0.955638 | 4.00E-18 | 454672 |
| Arm fat-free mass (left) | rs72892910 | 6 | 50816887 | T | G | 0.0203307 | 0.00166635 | 0.172211 | 3.10E-34 | 454672 |
| Arm fat-free mass (left) | rs578366 | 6 | 81591034 | G | A | -0.010451 | 0.0012716 | 0.420383 | 2.10E-16 | 454672 |
| Arm fat-free mass (left) | rs6902789 | 6 | 105358192 | A | G | 0.00809201 | 0.0013085 | 0.3677 | 6.20E-10 | 454672 |
| Arm fat-free mass (left) | rs10457469 | 6 | 126083658 | A | G | 0.0142199 | 0.00125761 | 0.523399 | 1.20E-29 | 454672 |
| Arm fat-free mass (left) | rs9388498 | 6 | 126873423 | T | G | 0.0161694 | 0.0016583 | 0.185959 | 1.80E-22 | 454672 |
| Arm fat-free mass (left) | rs6570509 | 6 | 142716286 | T | G | -0.0131668 | 0.00138834 | 0.287107 | 2.50E-21 | 454672 |
| Arm fat-free mass (left) | rs5019542 | 6 | 51738352 | T | C | -0.00744036 | 0.00130657 | 0.63632 | 1.20E-08 | 454672 |
| Arm fat-free mass (left) | rs10943915 | 6 | 83617970 | T | A | 0.00794605 | 0.00138172 | 0.297331 | 8.90E-09 | 454672 |
| Arm fat-free mass (left) | rs11153171 | 6 | 109653825 | T | C | -0.0118829 | 0.00131722 | 0.356038 | 1.90E-19 | 454672 |
| Arm fat-free mass (left) | rs7740107 | 6 | 130374461 | A | T | -0.0279673 | 0.00142488 | 0.736372 | 9.00E-86 | 454672 |
| Arm fat-free mass (left) | rs603321 | 6 | 140256669 | G | A | -0.0123215 | 0.0014691 | 0.244491 | 5.00E-17 | 454672 |
| Arm fat-free mass (left) | rs3853252 | 6 | 152170247 | A | G | 0.0146401 | 0.00126751 | 0.454874 | 7.40E-31 | 454672 |
| Arm fat-free mass (left) | rs9457777 | 6 | 160352921 | C | T | 0.00911479 | 0.0014947 | 0.227716 | 1.10E-09 | 454672 |
| Arm fat-free mass (left) | rs766164 | 6 | 164107208 | T | C | 0.00756546 | 0.00133415 | 0.662136 | 1.40E-08 | 454672 |
| Arm fat-free mass (left) | rs11243202 | 6 | 7719065 | C | T | 0.0173241 | 0.00126214 | 0.485934 | 7.10E-43 | 454672 |
| Arm fat-free mass (left) | rs12216497 | 6 | 19028623 | T | C | -0.0113971 | 0.00126822 | 0.561032 | 2.50E-19 | 454672 |
| Arm fat-free mass (left) | rs41271299 | 6 | 19839415 | T | C | 0.0403446 | 0.00284729 | 0.051245 | 1.40E-45 | 454672 |
| Arm fat-free mass (left) | rs3131115 | 6 | 30468791 | T | C | 0.0091591 | 0.00130313 | 0.365659 | 2.10E-12 | 454672 |
| Arm fat-free mass (left) | rs41268896 | 6 | 32070069 | A | G | -0.0163229 | 0.00137318 | 0.297535 | 1.40E-32 | 454672 |
| Arm fat-free mass (left) | rs1539111 | 6 | 120080096 | G | A | 0.00819886 | 0.00146617 | 0.24239 | 2.20E-08 | 454672 |
| Arm fat-free mass (left) | rs687694 | 6 | 153472227 | G | T | -0.00784079 | 0.00126276 | 0.495485 | 5.30E-10 | 454672 |
| Arm fat-free mass (left) | rs3099282 | 6 | 166584842 | G | A | -0.00877803 | 0.00154901 | 0.208413 | 1.50E-08 | 454672 |
| Arm fat-free mass (left) | rs2744956 | 6 | 34618937 | C | T | 0.0352908 | 0.00181283 | 0.139115 | 2.10E-84 | 454672 |
| Arm fat-free mass (left) | rs34045288 | 6 | 40369081 | T | C | 0.0117275 | 0.00133159 | 0.33442 | 1.30E-18 | 454672 |
| Arm fat-free mass (left) | rs1832897 | 6 | 44741714 | A | G | -0.00719391 | 0.00128197 | 0.596843 | 2.00E-08 | 454672 |
| Arm fat-free mass (left) | rs9350850 | 6 | 81050236 | C | T | 0.0223949 | 0.0023219 | 0.079503 | 5.20E-22 | 454672 |
| Arm fat-free mass (left) | rs6940643 | 6 | 82575450 | G | A | 0.00802678 | 0.00128543 | 0.403656 | 4.30E-10 | 454672 |
| Arm fat-free mass (left) | rs1006399 | 6 | 101039470 | A | G | -0.00886848 | 0.00126299 | 0.458963 | 2.20E-12 | 454672 |
| Arm fat-free mass (left) | rs35575481 | 6 | 163007746 | A | T | -0.0119598 | 0.00182396 | 0.137704 | 5.50E-11 | 454672 |
| Arm fat-free mass (left) | rs2457982 | 6 | 166313684 | A | G | 0.00852424 | 0.00141366 | 0.279335 | 1.60E-09 | 454672 |
| Arm fat-free mass (left) | rs10242866 | 7 | 17920613 | T | C | 0.00797569 | 0.0012866 | 0.39876 | 5.70E-10 | 454672 |
| Arm fat-free mass (left) | rs723149 | 7 | 46577056 | G | A | -0.00994685 | 0.00127043 | 0.562881 | 4.90E-15 | 454672 |
| Arm fat-free mass (left) | rs236628 | 7 | 75023850 | T | G | 0.0101812 | 0.00152506 | 0.235713 | 2.50E-11 | 454672 |
| Arm fat-free mass (left) | rs1701827 | 7 | 113040467 | G | A | -0.00820901 | 0.00142836 | 0.270384 | 9.10E-09 | 454672 |
| Arm fat-free mass (left) | rs836532 | 7 | 6472354 | A | G | 0.0102941 | 0.00157081 | 0.201617 | 5.60E-11 | 454672 |
| Arm fat-free mass (left) | rs10950207 | 7 | 70105168 | T | C | 0.00837424 | 0.00129661 | 0.384488 | 1.10E-10 | 454672 |
| Arm fat-free mass (left) | rs60667771 | 7 | 92471179 | C | T | 0.0102012 | 0.00171433 | 0.160482 | 2.70E-09 | 454672 |
| Arm fat-free mass (left) | rs28547519 | 7 | 121964618 | C | T | 0.0106829 | 0.00130586 | 0.365882 | 2.80E-16 | 454672 |
| Arm fat-free mass (left) | rs62621812 | 7 | 127015083 | A | G | 0.0392339 | 0.00459543 | 0.0203 | 1.40E-17 | 454672 |
| Arm fat-free mass (left) | rs6946415 | 7 | 150684548 | G | A | 0.0181054 | 0.00130435 | 0.627192 | 8.30E-44 | 454672 |
| Arm fat-free mass (left) | rs2533879 | 7 | 2859847 | A | G | -0.0169143 | 0.00137413 | 0.299759 | 8.10E-35 | 454672 |
| Arm fat-free mass (left) | rs2140910 | 7 | 39079473 | C | T | -0.0123427 | 0.00197292 | 0.884088 | 3.90E-10 | 454672 |
| Arm fat-free mass (left) | rs74876583 | 7 | 50602539 | G | T | 0.0166775 | 0.00196086 | 0.117157 | 1.80E-17 | 454672 |
| Arm fat-free mass (left) | rs10260993 | 7 | 55884295 | G | T | -0.00915417 | 0.00158921 | 0.195967 | 8.40E-09 | 454672 |
| Arm fat-free mass (left) | rs10269774 | 7 | 92253972 | A | G | 0.023769 | 0.00134303 | 0.32643 | 4.30E-70 | 454672 |
| Arm fat-free mass (left) | rs10243988 | 7 | 99528761 | A | G | -0.00982849 | 0.00159181 | 0.194781 | 6.60E-10 | 454672 |
| Arm fat-free mass (left) | rs822549 | 7 | 148649180 | C | T | 0.0107914 | 0.00142344 | 0.267416 | 3.40E-14 | 454672 |
| Arm fat-free mass (left) | rs10226050 | 7 | 8061334 | G | A | 0.00747832 | 0.0012647 | 0.456776 | 3.40E-09 | 454672 |
| Arm fat-free mass (left) | rs34776209 | 7 | 23513093 | T | C | -0.0143745 | 0.00146192 | 0.247485 | 8.10E-23 | 454672 |
| Arm fat-free mass (left) | rs12700901 | 7 | 28783171 | A | C | -0.00782461 | 0.00128854 | 0.405719 | 1.30E-09 | 454672 |
| Arm fat-free mass (left) | rs13240065 | 7 | 73015369 | A | G | 0.0180301 | 0.00187993 | 0.128416 | 8.70E-22 | 454672 |
| Arm fat-free mass (left) | rs115946508 | 7 | 150497496 | A | C | -0.0118429 | 0.00201349 | 0.111482 | 4.10E-09 | 454672 |
| Arm fat-free mass (left) | rs508347 | 7 | 28212824 | C | T | -0.0104501 | 0.00137828 | 0.703154 | 3.40E-14 | 454672 |
| Arm fat-free mass (left) | rs3778934 | 7 | 39445385 | C | A | -0.00788745 | 0.00132889 | 0.340603 | 2.90E-09 | 454672 |
| Arm fat-free mass (left) | rs7776917 | 7 | 93089120 | A | G | 0.0105682 | 0.00126348 | 0.476604 | 6.00E-17 | 454672 |
| Arm fat-free mass (left) | rs12375196 | 7 | 103416541 | A | C | 0.00999393 | 0.00128149 | 0.424299 | 6.30E-15 | 454672 |
| Arm fat-free mass (left) | rs55674305 | 8 | 89435868 | A | G | -0.00956192 | 0.00137075 | 0.306138 | 3.00E-12 | 454672 |
| Arm fat-free mass (left) | rs13271368 | 8 | 126506140 | T | C | -0.0118004 | 0.00150155 | 0.237496 | 3.90E-15 | 454672 |
| Arm fat-free mass (left) | rs12156265 | 8 | 144848756 | A | G | 0.00774646 | 0.00128333 | 0.590475 | 1.60E-09 | 454672 |
| Arm fat-free mass (left) | rs17089329 | 8 | 23390046 | G | C | 0.0117439 | 0.00158177 | 0.202671 | 1.10E-13 | 454672 |
| Arm fat-free mass (left) | rs13264909 | 8 | 64702385 | T | A | -0.00806106 | 0.00127521 | 0.428924 | 2.60E-10 | 454672 |
| Arm fat-free mass (left) | rs17828687 | 8 | 73454767 | A | C | -0.0100853 | 0.00127828 | 0.573237 | 3.00E-15 | 454672 |
| Arm fat-free mass (left) | rs4909912 | 8 | 135572297 | T | C | -0.0172232 | 0.00127667 | 0.426327 | 1.80E-41 | 454672 |
| Arm fat-free mass (left) | rs6984820 | 8 | 144993324 | T | C | -0.01057 | 0.00127871 | 0.422314 | 1.40E-16 | 454672 |
| Arm fat-free mass (left) | rs11777007 | 8 | 10801857 | T | C | -0.0100161 | 0.00126922 | 0.547306 | 3.00E-15 | 454672 |
| Arm fat-free mass (left) | rs11997525 | 8 | 49401982 | A | T | 0.0143861 | 0.00168945 | 0.167041 | 1.70E-17 | 454672 |
| Arm fat-free mass (left) | rs72656010 | 8 | 57122215 | C | T | -0.0317412 | 0.00186642 | 0.132275 | 7.40E-65 | 454672 |
| Arm fat-free mass (left) | rs7842996 | 8 | 78107140 | A | T | 0.0173732 | 0.00140038 | 0.284241 | 2.40E-35 | 454672 |
| Arm fat-free mass (left) | rs62515438 | 8 | 57161608 | G | T | 0.017193 | 0.00150231 | 0.227651 | 2.50E-30 | 454672 |
| Arm fat-free mass (left) | rs11779459 | 8 | 123980551 | T | C | 0.00753714 | 0.00132306 | 0.354878 | 1.20E-08 | 454672 |
| Arm fat-free mass (left) | rs12679359 | 8 | 130724556 | T | G | -0.0130769 | 0.00183313 | 0.136916 | 9.80E-13 | 454672 |
| Arm fat-free mass (left) | rs7843128 | 8 | 22473465 | C | T | -0.00814274 | 0.00131714 | 0.356761 | 6.30E-10 | 454672 |
| Arm fat-free mass (left) | rs4439140 | 8 | 23113908 | A | G | -0.00874377 | 0.00130966 | 0.417658 | 2.40E-11 | 454672 |
| Arm fat-free mass (left) | rs3925 | 8 | 38281658 | A | G | -0.00852655 | 0.00146707 | 0.244858 | 6.20E-09 | 454672 |
| Arm fat-free mass (left) | rs61729527 | 8 | 77761919 | T | C | -0.0206934 | 0.0028428 | 0.051874 | 3.40E-13 | 454672 |
| Arm fat-free mass (left) | rs16916881 | 8 | 95566270 | A | C | -0.0108247 | 0.00148295 | 0.235385 | 2.90E-13 | 454672 |
| Arm fat-free mass (left) | rs3808424 | 8 | 116518399 | C | T | -0.0150981 | 0.00152556 | 0.218178 | 4.30E-23 | 454672 |
| Arm fat-free mass (left) | rs1599473 | 8 | 120475358 | T | G | -0.0126394 | 0.00147221 | 0.243594 | 9.10E-18 | 454672 |
| Arm fat-free mass (left) | rs773145 | 9 | 77668969 | C | G | -0.00706717 | 0.00127947 | 0.415625 | 3.30E-08 | 454672 |
| Arm fat-free mass (left) | rs2482357 | 9 | 94179978 | A | G | -0.0100792 | 0.00127094 | 0.432266 | 2.20E-15 | 454672 |
| Arm fat-free mass (left) | rs10979612 | 9 | 111687379 | C | T | 0.0168803 | 0.00242123 | 0.072943 | 3.10E-12 | 454672 |
| Arm fat-free mass (left) | rs10985962 | 9 | 126080226 | T | C | -0.00771938 | 0.0013154 | 0.633332 | 4.40E-09 | 454672 |
| Arm fat-free mass (left) | rs4073153 | 9 | 139259349 | G | A | 0.00800556 | 0.00127846 | 0.438862 | 3.80E-10 | 454672 |
| Arm fat-free mass (left) | rs11794152 | 9 | 23345347 | G | A | 0.00937786 | 0.00128087 | 0.415091 | 2.50E-13 | 454672 |
| Arm fat-free mass (left) | rs1412234 | 9 | 28410683 | C | T | 0.0109535 | 0.00134591 | 0.327318 | 4.00E-16 | 454672 |
| Arm fat-free mass (left) | rs2380784 | 9 | 33580929 | C | T | 0.0150164 | 0.00261712 | 0.061732 | 9.60E-09 | 454672 |
| Arm fat-free mass (left) | rs13299559 | 9 | 128041828 | T | C | -0.0091139 | 0.00126846 | 0.450171 | 6.70E-13 | 454672 |
| Arm fat-free mass (left) | rs1927635 | 9 | 16461905 | C | T | 0.0104318 | 0.00133258 | 0.354177 | 4.90E-15 | 454672 |
| Arm fat-free mass (left) | rs11142700 | 9 | 73757155 | C | T | -0.00817434 | 0.00128482 | 0.408316 | 2.00E-10 | 454672 |
| Arm fat-free mass (left) | rs28457693 | 9 | 98217348 | G | A | 0.0226783 | 0.0020462 | 0.106864 | 1.50E-28 | 454672 |
| Arm fat-free mass (left) | rs1008158 | 9 | 113828811 | G | A | 0.00775549 | 0.00133611 | 0.341722 | 6.50E-09 | 454672 |
| Arm fat-free mass (left) | rs7033487 | 9 | 119129257 | C | T | -0.0204152 | 0.00158339 | 0.197512 | 4.90E-38 | 454672 |
| Arm fat-free mass (left) | rs111821073 | 9 | 99084793 | T | C | 0.0163467 | 0.00174727 | 0.157062 | 8.30E-21 | 454672 |
| Arm fat-free mass (left) | rs56141370 | 9 | 127056213 | T | C | 0.0155694 | 0.00197882 | 0.114754 | 3.60E-15 | 454672 |
| Arm fat-free mass (left) | rs1056747 | 9 | 35690102 | G | A | -0.00713518 | 0.00127948 | 0.411683 | 2.50E-08 | 454672 |
| Arm fat-free mass (left) | rs10746837 | 9 | 90873653 | A | G | -0.0106255 | 0.00128471 | 0.580765 | 1.30E-16 | 454672 |
| Arm fat-free mass (left) | rs532436 | 9 | 136149830 | A | G | -0.0104599 | 0.00162168 | 0.185015 | 1.10E-10 | 454672 |
| Arm fat-free mass (left) | rs2165468 | 10 | 3516105 | A | C | -0.0116107 | 0.00197647 | 0.114111 | 4.20E-09 | 454672 |
| Arm fat-free mass (left) | rs75406471 | 10 | 5257647 | A | G | 0.0131891 | 0.00174575 | 0.15427 | 4.20E-14 | 454672 |
| Arm fat-free mass (left) | rs11014285 | 10 | 25178864 | A | G | 0.0169343 | 0.0017175 | 0.165275 | 6.20E-23 | 454672 |
| Arm fat-free mass (left) | rs7906411 | 10 | 35047919 | C | T | -0.00817209 | 0.00143235 | 0.26098 | 1.20E-08 | 454672 |
| Arm fat-free mass (left) | rs1937684 | 10 | 53680085 | A | T | 0.00779507 | 0.00132916 | 0.654158 | 4.50E-09 | 454672 |
| Arm fat-free mass (left) | rs7099526 | 10 | 79657705 | G | C | -0.0081548 | 0.00137005 | 0.307414 | 2.60E-09 | 454672 |
| Arm fat-free mass (left) | rs11245450 | 10 | 126658075 | A | G | -0.0105074 | 0.00128839 | 0.421941 | 3.50E-16 | 454672 |
| Arm fat-free mass (left) | rs73601548 | 10 | 18549889 | T | C | 0.0146664 | 0.00198614 | 0.114539 | 1.50E-13 | 454672 |
| Arm fat-free mass (left) | rs10995319 | 10 | 52762887 | C | T | -0.00835398 | 0.0014899 | 0.234458 | 2.10E-08 | 454672 |
| Arm fat-free mass (left) | rs7085079 | 10 | 70198027 | G | A | 0.0129836 | 0.00152869 | 0.782398 | 2.00E-17 | 454672 |
| Arm fat-free mass (left) | rs10883560 | 10 | 102673707 | G | C | 0.0158456 | 0.00127514 | 0.42873 | 1.90E-35 | 454672 |
| Arm fat-free mass (left) | rs11196150 | 10 | 114678843 | A | G | -0.00835987 | 0.00127133 | 0.490132 | 4.80E-11 | 454672 |
| Arm fat-free mass (left) | rs68156080 | 10 | 63781673 | G | A | -0.00888562 | 0.00142003 | 0.274301 | 3.90E-10 | 454672 |
| Arm fat-free mass (left) | rs7072873 | 10 | 77210191 | T | C | -0.0109058 | 0.00126968 | 0.538818 | 8.70E-18 | 454672 |
| Arm fat-free mass (left) | rs6585827 | 10 | 124165615 | A | G | 0.0103429 | 0.0012612 | 0.470873 | 2.40E-16 | 454672 |
| Arm fat-free mass (left) | rs61849823 | 10 | 53290991 | C | T | 0.0105035 | 0.00171476 | 0.164171 | 9.00E-10 | 454672 |
| Arm fat-free mass (left) | rs2265309 | 10 | 104487871 | C | T | -0.0124995 | 0.00126172 | 0.516959 | 3.90E-23 | 454672 |
| Arm fat-free mass (left) | rs1421035 | 10 | 131136401 | T | C | 0.00843407 | 0.00133372 | 0.347771 | 2.60E-10 | 454672 |
| Arm fat-free mass (left) | rs10740991 | 10 | 22058137 | C | G | -0.0106232 | 0.00140097 | 0.717743 | 3.40E-14 | 454672 |
| Arm fat-free mass (left) | rs74370230 | 10 | 87397275 | C | G | 0.0194695 | 0.00289434 | 0.050042 | 1.70E-11 | 454672 |
| Arm fat-free mass (left) | rs11593630 | 10 | 120491506 | T | C | -0.00784994 | 0.00131689 | 0.352989 | 2.50E-09 | 454672 |
| Arm fat-free mass (left) | rs35506085 | 11 | 2165576 | A | G | -0.0183697 | 0.00163512 | 0.185108 | 2.80E-29 | 454672 |
| Arm fat-free mass (left) | rs6265 | 11 | 27679916 | T | C | -0.0205443 | 0.00161076 | 0.188489 | 2.90E-37 | 454672 |
| Arm fat-free mass (left) | rs597053 | 11 | 30441946 | C | T | 0.0130813 | 0.00137383 | 0.303533 | 1.70E-21 | 454672 |
| Arm fat-free mass (left) | rs939105 | 11 | 45949534 | T | C | 0.012119 | 0.00210791 | 0.898966 | 9.00E-09 | 454672 |
| Arm fat-free mass (left) | rs2450128 | 11 | 77940075 | A | G | -0.0106884 | 0.00175592 | 0.151953 | 1.20E-09 | 454672 |
| Arm fat-free mass (left) | rs1813212 | 11 | 89301382 | G | A | -0.00736982 | 0.00126996 | 0.445624 | 6.50E-09 | 454672 |
| Arm fat-free mass (left) | rs7933085 | 11 | 130796248 | G | A | 0.00697305 | 0.00126735 | 0.507504 | 3.80E-08 | 454672 |
| Arm fat-free mass (left) | rs11042725 | 11 | 10325325 | A | C | -0.0100817 | 0.00125881 | 0.488454 | 1.20E-15 | 454672 |
| Arm fat-free mass (left) | rs7129320 | 11 | 68388220 | A | G | -0.0208578 | 0.00169287 | 0.165941 | 7.00E-35 | 454672 |
| Arm fat-free mass (left) | rs286501 | 11 | 85194099 | C | G | 0.013117 | 0.00238915 | 0.9246 | 4.00E-08 | 454672 |
| Arm fat-free mass (left) | rs56207600 | 11 | 126196537 | A | G | 0.0121157 | 0.00201684 | 0.110895 | 1.90E-09 | 454672 |
| Arm fat-free mass (left) | rs35251247 | 11 | 43878459 | A | G | 0.0115159 | 0.00139483 | 0.291966 | 1.50E-16 | 454672 |
| Arm fat-free mass (left) | rs4256933 | 11 | 48096938 | G | A | -0.00934386 | 0.00135555 | 0.683999 | 5.50E-12 | 454672 |
| Arm fat-free mass (left) | rs7952436 | 11 | 67024534 | T | C | -0.0324192 | 0.00229654 | 0.082029 | 3.00E-45 | 454672 |
| Arm fat-free mass (left) | rs744205 | 11 | 69929677 | A | G | 0.00866285 | 0.00126699 | 0.543566 | 8.10E-12 | 454672 |
| Arm fat-free mass (left) | rs7104785 | 11 | 804212 | A | C | 0.00723635 | 0.00126376 | 0.511785 | 1.00E-08 | 454672 |
| Arm fat-free mass (left) | rs4922819 | 11 | 29349419 | G | A | 0.00959226 | 0.00137655 | 0.303742 | 3.20E-12 | 454672 |
| Arm fat-free mass (left) | rs78287937 | 11 | 64773101 | G | T | 0.0137179 | 0.0022031 | 0.089979 | 4.80E-10 | 454672 |
| Arm fat-free mass (left) | rs667515 | 11 | 69449076 | C | G | -0.00874481 | 0.00129877 | 0.386058 | 1.70E-11 | 454672 |
| Arm fat-free mass (left) | rs12785387 | 11 | 120221987 | T | C | -0.0111265 | 0.00171227 | 0.161188 | 8.10E-11 | 454672 |
| Arm fat-free mass (left) | rs7964189 | 12 | 12841735 | T | C | -0.0119714 | 0.00216644 | 0.093108 | 3.30E-08 | 454672 |
| Arm fat-free mass (left) | rs10748128 | 12 | 69827658 | T | G | 0.00916217 | 0.00132515 | 0.344614 | 4.70E-12 | 454672 |
| Arm fat-free mass (left) | rs10861681 | 12 | 107334262 | T | C | -0.00987909 | 0.00137866 | 0.296813 | 7.70E-13 | 454672 |
| Arm fat-free mass (left) | rs2897968 | 12 | 46763686 | A | G | 0.0143248 | 0.00129138 | 0.607013 | 1.40E-28 | 454672 |
| Arm fat-free mass (left) | rs3759094 | 12 | 56497903 | T | C | -0.0110639 | 0.00133272 | 0.337208 | 1.00E-16 | 454672 |
| Arm fat-free mass (left) | rs1351394 | 12 | 66351826 | C | T | -0.0223457 | 0.00125853 | 0.511901 | 1.60E-70 | 454672 |
| Arm fat-free mass (left) | rs9634212 | 12 | 93993266 | A | C | 0.0228547 | 0.0015238 | 0.22068 | 7.50E-51 | 454672 |
| Arm fat-free mass (left) | rs57465027 | 12 | 116627026 | C | G | -0.00947932 | 0.0015628 | 0.203836 | 1.30E-09 | 454672 |
| Arm fat-free mass (left) | rs76895963 | 12 | 4384844 | G | T | 0.0845144 | 0.00487813 | 0.020662 | 3.00E-67 | 454672 |
| Arm fat-free mass (left) | rs6487088 | 12 | 20588382 | T | C | 0.0114039 | 0.00160295 | 0.799637 | 1.10E-12 | 454672 |
| Arm fat-free mass (left) | rs10843397 | 12 | 29529523 | T | C | 0.00803094 | 0.00146792 | 0.241781 | 4.50E-08 | 454672 |
| Arm fat-free mass (left) | rs2034923 | 12 | 41883096 | C | A | 0.00883684 | 0.00125986 | 0.488692 | 2.30E-12 | 454672 |
| Arm fat-free mass (left) | rs3730071 | 12 | 49168798 | A | C | -0.023004 | 0.00367607 | 0.030235 | 3.90E-10 | 454672 |
| Arm fat-free mass (left) | rs822688 | 12 | 53493387 | T | C | 0.0121155 | 0.00194852 | 0.124164 | 5.00E-10 | 454672 |
| Arm fat-free mass (left) | rs34118426 | 12 | 94201279 | G | A | -0.010448 | 0.00136882 | 0.304419 | 2.30E-14 | 454672 |
| Arm fat-free mass (left) | rs11060406 | 12 | 123339117 | T | C | -0.0249206 | 0.00340011 | 0.036737 | 2.30E-13 | 454672 |
| Arm fat-free mass (left) | rs73068226 | 12 | 24078798 | A | T | -0.0106192 | 0.00138189 | 0.297595 | 1.50E-14 | 454672 |
| Arm fat-free mass (left) | rs11049684 | 12 | 28665359 | T | C | -0.0102954 | 0.00137474 | 0.298819 | 6.90E-14 | 454672 |
| Arm fat-free mass (left) | rs7132908 | 12 | 50263148 | A | G | 0.0153324 | 0.00129449 | 0.384451 | 2.30E-32 | 454672 |
| Arm fat-free mass (left) | rs11175890 | 12 | 66118509 | T | C | -0.00830394 | 0.0014554 | 0.266859 | 1.20E-08 | 454672 |
| Arm fat-free mass (left) | rs310796 | 12 | 77453226 | T | G | 0.0103107 | 0.00135458 | 0.680932 | 2.70E-14 | 454672 |
| Arm fat-free mass (left) | rs73180805 | 12 | 103036662 | G | A | -0.0121473 | 0.00173561 | 0.157286 | 2.60E-12 | 454672 |
| Arm fat-free mass (left) | rs11065015 | 12 | 120520863 | T | C | -0.0277399 | 0.00394321 | 0.027213 | 2.00E-12 | 454672 |
| Arm fat-free mass (left) | rs55726687 | 12 | 991306 | A | G | 0.0160004 | 0.00154418 | 0.209747 | 3.70E-25 | 454672 |
| Arm fat-free mass (left) | rs67551338 | 12 | 3393100 | T | C | 0.0186819 | 0.00265067 | 0.061475 | 1.80E-12 | 454672 |
| Arm fat-free mass (left) | rs2900208 | 12 | 11878464 | A | C | 0.0139652 | 0.001318 | 0.353574 | 3.10E-26 | 454672 |
| Arm fat-free mass (left) | rs1949549 | 12 | 90170056 | C | T | 0.00865402 | 0.00140273 | 0.721579 | 6.90E-10 | 454672 |
| Arm fat-free mass (left) | rs7971536 | 12 | 102373788 | A | T | -0.0106555 | 0.0012602 | 0.494214 | 2.80E-17 | 454672 |
| Arm fat-free mass (left) | rs11065979 | 12 | 112059557 | T | C | -0.0145407 | 0.00126957 | 0.438472 | 2.30E-30 | 454672 |
| Arm fat-free mass (left) | rs1473553 | 12 | 122985057 | T | G | 0.0160509 | 0.00144406 | 0.745106 | 1.10E-28 | 454672 |
| Arm fat-free mass (left) | rs1271309 | 12 | 124820705 | G | A | -0.0177414 | 0.0017117 | 0.837863 | 3.60E-25 | 454672 |
| Arm fat-free mass (left) | rs73482190 | 12 | 132593644 | G | A | 0.0153856 | 0.00270209 | 0.057435 | 1.20E-08 | 454672 |
| Arm fat-free mass (left) | rs2291256 | 12 | 133393323 | T | C | 0.0150829 | 0.00222628 | 0.087655 | 1.20E-11 | 454672 |
| Arm fat-free mass (left) | rs3118915 | 13 | 51124662 | T | C | -0.0254168 | 0.00153715 | 0.21558 | 2.10E-61 | 454672 |
| Arm fat-free mass (left) | rs7992723 | 13 | 53946802 | T | C | 0.00807588 | 0.00132985 | 0.345806 | 1.30E-09 | 454672 |
| Arm fat-free mass (left) | rs1949204 | 13 | 65475834 | G | T | 0.00813183 | 0.00148141 | 0.761361 | 4.00E-08 | 454672 |
| Arm fat-free mass (left) | rs11616283 | 13 | 21493853 | C | T | 0.0109865 | 0.00184752 | 0.139893 | 2.70E-09 | 454672 |
| Arm fat-free mass (left) | rs1967772 | 13 | 28036062 | A | G | -0.0102895 | 0.0014053 | 0.285209 | 2.40E-13 | 454672 |
| Arm fat-free mass (left) | rs77079139 | 13 | 40769698 | A | G | 0.0109874 | 0.00189233 | 0.128598 | 6.40E-09 | 454672 |
| Arm fat-free mass (left) | rs67141907 | 13 | 42805360 | T | C | 0.0117797 | 0.00177714 | 0.149194 | 3.40E-11 | 454672 |
| Arm fat-free mass (left) | rs146851424 | 13 | 50377910 | C | A | 0.0512723 | 0.00437461 | 0.021627 | 1.00E-31 | 454672 |
| Arm fat-free mass (left) | rs61950323 | 13 | 54070046 | T | C | 0.0183972 | 0.00273004 | 0.058142 | 1.60E-11 | 454672 |
| Arm fat-free mass (left) | rs7318788 | 13 | 99578265 | C | T | -0.00994287 | 0.00137517 | 0.699191 | 4.80E-13 | 454672 |
| Arm fat-free mass (left) | rs10870597 | 13 | 114999636 | G | A | -0.0105218 | 0.00148748 | 0.235375 | 1.50E-12 | 454672 |
| Arm fat-free mass (left) | rs9317002 | 13 | 59175727 | A | C | 0.010995 | 0.00127139 | 0.514585 | 5.20E-18 | 454672 |
| Arm fat-free mass (left) | rs9540493 | 13 | 66205704 | G | A | -0.007656 | 0.00127388 | 0.545165 | 1.90E-09 | 454672 |
| Arm fat-free mass (left) | rs1176310 | 13 | 81216080 | G | T | -0.00774823 | 0.00127501 | 0.552208 | 1.20E-09 | 454672 |
| Arm fat-free mass (left) | rs11618507 | 13 | 30172751 | T | G | 0.0104765 | 0.00151167 | 0.22596 | 4.20E-12 | 454672 |
| Arm fat-free mass (left) | rs1360371 | 13 | 78455230 | C | T | 0.013053 | 0.00150973 | 0.774319 | 5.30E-18 | 454672 |
| Arm fat-free mass (left) | rs7321045 | 13 | 97034410 | A | G | 0.00898377 | 0.00127761 | 0.448785 | 2.00E-12 | 454672 |
| Arm fat-free mass (left) | rs1135641 | 14 | 23299135 | T | G | -0.00760863 | 0.00126512 | 0.530802 | 1.80E-09 | 454672 |
| Arm fat-free mass (left) | rs11157528 | 14 | 47306880 | T | C | -0.00790866 | 0.00126325 | 0.501485 | 3.80E-10 | 454672 |
| Arm fat-free mass (left) | rs875908 | 14 | 23907608 | G | C | 0.00830473 | 0.00131473 | 0.641801 | 2.70E-10 | 454672 |
| Arm fat-free mass (left) | rs145391487 | 14 | 35659519 | A | G | -0.0132844 | 0.00204481 | 0.108481 | 8.20E-11 | 454672 |
| Arm fat-free mass (left) | rs2296316 | 14 | 65520246 | C | T | -0.00992284 | 0.00127435 | 0.464519 | 6.90E-15 | 454672 |
| Arm fat-free mass (left) | rs982972 | 14 | 73343715 | T | C | 0.00725534 | 0.00129468 | 0.403949 | 2.10E-08 | 454672 |
| Arm fat-free mass (left) | rs6575340 | 14 | 94023972 | A | G | 0.00881902 | 0.00131398 | 0.63602 | 1.90E-11 | 454672 |
| Arm fat-free mass (left) | rs71420186 | 14 | 50960918 | A | G | -0.0158326 | 0.00254287 | 0.06705 | 4.80E-10 | 454672 |
| Arm fat-free mass (left) | rs56130943 | 14 | 105906522 | C | A | 0.00916387 | 0.00153224 | 0.233167 | 2.20E-09 | 454672 |
| Arm fat-free mass (left) | rs3212260 | 14 | 24804088 | T | A | 0.0119537 | 0.00144361 | 0.257909 | 1.20E-16 | 454672 |
| Arm fat-free mass (left) | rs112957890 | 14 | 36220876 | G | A | 0.00795113 | 0.00144415 | 0.264836 | 3.70E-08 | 454672 |
| Arm fat-free mass (left) | rs4899012 | 14 | 61003889 | C | G | -0.0206327 | 0.00129163 | 0.607277 | 1.90E-57 | 454672 |
| Arm fat-free mass (left) | rs11160601 | 14 | 101186641 | T | C | 0.0164681 | 0.00219606 | 0.09237 | 6.40E-14 | 454672 |
| Arm fat-free mass (left) | rs61992671 | 14 | 101531854 | G | A | -0.0104383 | 0.00131879 | 0.492054 | 2.50E-15 | 454672 |
| Arm fat-free mass (left) | rs12879423 | 14 | 25927832 | G | A | 0.0138531 | 0.00135877 | 0.678698 | 2.10E-24 | 454672 |
| Arm fat-free mass (left) | rs2884345 | 14 | 53323211 | A | G | -0.00761011 | 0.00139236 | 0.710238 | 4.60E-08 | 454672 |
| Arm fat-free mass (left) | rs7150606 | 14 | 68413076 | T | G | -0.0101984 | 0.00180908 | 0.142108 | 1.70E-08 | 454672 |
| Arm fat-free mass (left) | rs7141420 | 14 | 79899454 | T | C | 0.0124911 | 0.00127077 | 0.5165 | 8.40E-23 | 454672 |
| Arm fat-free mass (left) | rs112560164 | 14 | 93112924 | A | G | 0.00975993 | 0.00160911 | 0.190607 | 1.30E-09 | 454672 |
| Arm fat-free mass (left) | rs12888955 | 14 | 103256877 | A | G | -0.00875819 | 0.00132716 | 0.657276 | 4.10E-11 | 454672 |
| Arm fat-free mass (left) | rs933807 | 15 | 62274940 | C | G | -0.0103176 | 0.00126683 | 0.452548 | 3.80E-16 | 454672 |
| Arm fat-free mass (left) | rs35874463 | 15 | 67457698 | G | A | 0.0155049 | 0.00270351 | 0.057663 | 9.70E-09 | 454672 |
| Arm fat-free mass (left) | rs1521624 | 15 | 79412399 | A | C | -0.00942187 | 0.00127064 | 0.470505 | 1.20E-13 | 454672 |
| Arm fat-free mass (left) | rs1915699 | 15 | 99497912 | G | A | 0.021099 | 0.00350686 | 0.033652 | 1.80E-09 | 454672 |
| Arm fat-free mass (left) | rs11635207 | 15 | 66504224 | G | A | -0.00901134 | 0.00157765 | 0.208022 | 1.10E-08 | 454672 |
| Arm fat-free mass (left) | rs16942323 | 15 | 89383764 | C | T | -0.0344066 | 0.00390398 | 0.026918 | 1.20E-18 | 454672 |
| Arm fat-free mass (left) | rs147233090 | 15 | 44028047 | T | C | -0.0235028 | 0.00408544 | 0.024753 | 8.80E-09 | 454672 |
| Arm fat-free mass (left) | rs11071182 | 15 | 55644676 | G | A | 0.0126599 | 0.00188635 | 0.870441 | 1.90E-11 | 454672 |
| Arm fat-free mass (left) | rs380803 | 15 | 68161273 | C | T | 0.00943268 | 0.00141074 | 0.722723 | 2.30E-11 | 454672 |
| Arm fat-free mass (left) | rs12907384 | 15 | 86276000 | C | T | -0.010877 | 0.00126336 | 0.531892 | 7.30E-18 | 454672 |
| Arm fat-free mass (left) | rs28810086 | 15 | 41971480 | A | G | -0.0100537 | 0.00132039 | 0.64464 | 2.70E-14 | 454672 |
| Arm fat-free mass (left) | rs8034033 | 15 | 38367091 | A | C | -0.0112654 | 0.0013934 | 0.70797 | 6.20E-16 | 454672 |
| Arm fat-free mass (left) | rs3809570 | 15 | 67000117 | A | C | 0.0137924 | 0.00147409 | 0.24332 | 8.20E-21 | 454672 |
| Arm fat-free mass (left) | rs12900800 | 15 | 93512678 | A | G | -0.00937906 | 0.00146834 | 0.754133 | 1.70E-10 | 454672 |
| Arm fat-free mass (left) | rs1573891 | 15 | 99186488 | C | G | -0.0192736 | 0.0017378 | 0.158471 | 1.40E-28 | 454672 |
| Arm fat-free mass (left) | rs72755233 | 15 | 100692953 | A | G | -0.0123235 | 0.00200254 | 0.111457 | 7.60E-10 | 454672 |
| Arm fat-free mass (left) | rs25849 | 16 | 2265071 | G | C | 0.0167158 | 0.00139629 | 0.288774 | 5.00E-33 | 454672 |
| Arm fat-free mass (left) | rs6500249 | 16 | 49778147 | G | A | -0.00798295 | 0.00143527 | 0.734693 | 2.70E-08 | 454672 |
| Arm fat-free mass (left) | rs56094641 | 16 | 53806453 | G | A | 0.0357163 | 0.00128397 | 0.404663 | 2.70E-170 | 454672 |
| Arm fat-free mass (left) | rs11648796 | 16 | 792190 | G | A | 0.0129426 | 0.00156606 | 0.231571 | 1.40E-16 | 454672 |
| Arm fat-free mass (left) | rs71385734 | 16 | 2160503 | G | T | -0.0237937 | 0.00168871 | 0.169901 | 4.40E-45 | 454672 |
| Arm fat-free mass (left) | rs2251666 | 16 | 4923091 | A | G | 0.00796996 | 0.00133013 | 0.343605 | 2.10E-09 | 454672 |
| Arm fat-free mass (left) | rs35467921 | 16 | 30048553 | T | C | 0.0206001 | 0.00128584 | 0.4004 | 9.20E-58 | 454672 |
| Arm fat-free mass (left) | rs10775348 | 16 | 88806348 | G | A | 0.0113827 | 0.00138415 | 0.703667 | 2.00E-16 | 454672 |
| Arm fat-free mass (left) | rs2240735 | 16 | 4027605 | T | C | 0.0149195 | 0.00144958 | 0.747638 | 7.60E-25 | 454672 |
| Arm fat-free mass (left) | rs72774845 | 16 | 15147954 | C | A | -0.0111665 | 0.00136508 | 0.307453 | 2.80E-16 | 454672 |
| Arm fat-free mass (left) | rs66674044 | 16 | 19904344 | T | A | -0.0165623 | 0.00180265 | 0.144586 | 4.00E-20 | 454672 |
| Arm fat-free mass (left) | rs2726036 | 16 | 28347140 | C | A | 0.0104598 | 0.00128999 | 0.398066 | 5.10E-16 | 454672 |
| Arm fat-free mass (left) | rs34147411 | 16 | 68081246 | T | C | 0.0126635 | 0.00180169 | 0.146047 | 2.10E-12 | 454672 |
| Arm fat-free mass (left) | rs76513770 | 16 | 72505534 | C | T | -0.0151984 | 0.00188641 | 0.128137 | 7.80E-16 | 454672 |
| Arm fat-free mass (left) | rs34339547 | 16 | 81651578 | C | T | 0.00820053 | 0.00128539 | 0.40867 | 1.80E-10 | 454672 |
| Arm fat-free mass (left) | rs72801843 | 16 | 53508802 | A | T | 0.0131874 | 0.00137334 | 0.301408 | 7.80E-22 | 454672 |
| Arm fat-free mass (left) | rs8059189 | 16 | 86417349 | A | G | -0.0105463 | 0.00131841 | 0.403863 | 1.30E-15 | 454672 |
| Arm fat-free mass (left) | rs34017457 | 16 | 67166731 | A | G | 0.0459854 | 0.00758622 | 0.006948 | 1.30E-09 | 454672 |
| Arm fat-free mass (left) | rs78378222 | 17 | 7571752 | G | T | 0.0764113 | 0.00584951 | 0.012277 | 5.40E-39 | 454672 |
| Arm fat-free mass (left) | rs4795318 | 17 | 36949053 | T | C | 0.00814965 | 0.00126311 | 0.520324 | 1.10E-10 | 454672 |
| Arm fat-free mass (left) | rs28712647 | 17 | 7235817 | G | C | 0.0106477 | 0.001544 | 0.214894 | 5.30E-12 | 454672 |
| Arm fat-free mass (left) | rs7223535 | 17 | 29211667 | A | G | -0.0221634 | 0.00141964 | 0.270359 | 6.00E-55 | 454672 |
| Arm fat-free mass (left) | rs8070437 | 17 | 43257270 | T | C | 0.0127623 | 0.00139407 | 0.703977 | 5.50E-20 | 454672 |
| Arm fat-free mass (left) | rs1401796 | 17 | 54839759 | A | C | -0.00695651 | 0.00126976 | 0.51579 | 4.30E-08 | 454672 |
| Arm fat-free mass (left) | rs2005172 | 17 | 61996255 | C | A | 0.0196837 | 0.00132929 | 0.639788 | 1.30E-49 | 454672 |
| Arm fat-free mass (left) | rs79680939 | 17 | 80523375 | A | G | 0.0175036 | 0.00305344 | 0.044939 | 9.90E-09 | 454672 |
| Arm fat-free mass (left) | rs77093479 | 17 | 79429575 | G | C | -0.010774 | 0.00171236 | 0.165094 | 3.10E-10 | 454672 |
| Arm fat-free mass (left) | rs1242507 | 17 | 17365399 | A | G | 0.00750327 | 0.00131746 | 0.560972 | 1.20E-08 | 454672 |
| Arm fat-free mass (left) | rs68106312 | 17 | 47065115 | A | G | 0.0178452 | 0.00216643 | 0.095545 | 1.80E-16 | 454672 |
| Arm fat-free mass (left) | rs35631456 | 17 | 61784471 | T | C | -0.0118056 | 0.00196732 | 0.117335 | 2.00E-09 | 454672 |
| Arm fat-free mass (left) | rs114177791 | 17 | 78555512 | T | G | 0.0111751 | 0.00153919 | 0.214243 | 3.90E-13 | 454672 |
| Arm fat-free mass (left) | rs36000545 | 17 | 79093822 | G | A | -0.0158694 | 0.00130665 | 0.395726 | 6.10E-34 | 454672 |
| Arm fat-free mass (left) | rs55831773 | 17 | 7559037 | T | C | -0.0134644 | 0.00160985 | 0.19946 | 6.10E-17 | 454672 |
| Arm fat-free mass (left) | rs3110496 | 17 | 27917771 | G | A | 0.00775325 | 0.00135805 | 0.68613 | 1.10E-08 | 454672 |
| Arm fat-free mass (left) | rs10775406 | 17 | 46197755 | G | A | -0.00961145 | 0.00147535 | 0.759761 | 7.30E-11 | 454672 |
| Arm fat-free mass (left) | rs758598 | 17 | 59492714 | G | A | -0.0154809 | 0.00133963 | 0.668778 | 6.90E-31 | 454672 |
| Arm fat-free mass (left) | rs173135 | 17 | 68172326 | T | C | -0.0153546 | 0.00198901 | 0.115082 | 1.20E-14 | 454672 |
| Arm fat-free mass (left) | rs57126421 | 18 | 2656989 | G | A | -0.0101741 | 0.00149202 | 0.237616 | 9.20E-12 | 454672 |
| Arm fat-free mass (left) | rs8091287 | 18 | 45753742 | C | T | -0.00874521 | 0.00149421 | 0.231872 | 4.80E-09 | 454672 |
| Arm fat-free mass (left) | rs4369779 | 18 | 20735408 | C | T | 0.0254297 | 0.00154497 | 0.78896 | 7.10E-61 | 454672 |
| Arm fat-free mass (left) | rs1443641 | 18 | 32690756 | T | A | 0.00737919 | 0.00127841 | 0.456153 | 7.80E-09 | 454672 |
| Arm fat-free mass (left) | rs11664336 | 18 | 46604851 | T | A | 0.0123423 | 0.00127386 | 0.43459 | 3.40E-22 | 454672 |
| Arm fat-free mass (left) | rs6567160 | 18 | 57829135 | C | T | 0.0417283 | 0.0014933 | 0.232654 | 7.91E-172 | 454672 |
| Arm fat-free mass (left) | rs59839808 | 18 | 74323384 | C | T | -0.0125126 | 0.00223692 | 0.088641 | 2.20E-08 | 454672 |
| Arm fat-free mass (left) | rs7229351 | 18 | 46516374 | A | G | -0.00920819 | 0.00130863 | 0.367653 | 2.00E-12 | 454672 |
| Arm fat-free mass (left) | rs57636386 | 18 | 58048295 | C | T | -0.02144 | 0.00228406 | 0.083838 | 6.20E-21 | 454672 |
| Arm fat-free mass (left) | rs9960148 | 18 | 23417359 | T | G | -0.00740958 | 0.0012952 | 0.391071 | 1.10E-08 | 454672 |
| Arm fat-free mass (left) | rs1941697 | 18 | 31251276 | A | G | 0.00814841 | 0.00126796 | 0.449186 | 1.30E-10 | 454672 |
| Arm fat-free mass (left) | rs9960619 | 18 | 33040095 | T | C | 0.00872297 | 0.00132879 | 0.344323 | 5.20E-11 | 454672 |
| Arm fat-free mass (left) | rs2276190 | 18 | 63430340 | A | G | 0.00845336 | 0.0014117 | 0.277453 | 2.10E-09 | 454672 |
| Arm fat-free mass (left) | rs9951619 | 18 | 56882326 | G | T | 0.0111348 | 0.00150316 | 0.767293 | 1.30E-13 | 454672 |
| Arm fat-free mass (left) | rs58980065 | 18 | 74979601 | G | A | -0.0233662 | 0.00315579 | 0.041749 | 1.30E-13 | 454672 |
| Arm fat-free mass (left) | rs10432304 | 19 | 4458242 | T | A | 0.00741569 | 0.00129057 | 0.560074 | 9.10E-09 | 454672 |
| Arm fat-free mass (left) | rs1864000 | 19 | 7110550 | G | T | -0.0136233 | 0.0018678 | 0.140113 | 3.00E-13 | 454672 |
| Arm fat-free mass (left) | rs62621197 | 19 | 8670147 | T | C | -0.0270122 | 0.00346343 | 0.037196 | 6.20E-15 | 454672 |
| Arm fat-free mass (left) | rs12980774 | 19 | 3410135 | C | T | 0.00965602 | 0.0015237 | 0.221259 | 2.30E-10 | 454672 |
| Arm fat-free mass (left) | rs10404726 | 19 | 18834514 | T | C | -0.00844933 | 0.00126686 | 0.465528 | 2.60E-11 | 454672 |
| Arm fat-free mass (left) | rs111874529 | 19 | 30709841 | A | C | -0.0119181 | 0.00155921 | 0.207385 | 2.10E-14 | 454672 |
| Arm fat-free mass (left) | rs285677 | 19 | 34286666 | C | T | 0.00987641 | 0.00134757 | 0.67062 | 2.30E-13 | 454672 |
| Arm fat-free mass (left) | rs3810291 | 19 | 47569003 | A | G | 0.0166991 | 0.00134637 | 0.675093 | 2.50E-35 | 454672 |
| Arm fat-free mass (left) | rs36060191 | 19 | 49573105 | G | A | -0.00862308 | 0.00143726 | 0.263462 | 2.00E-09 | 454672 |
| Arm fat-free mass (left) | rs147110934 | 19 | 55993436 | T | G | -0.0264689 | 0.00409645 | 0.024295 | 1.00E-10 | 454672 |
| Arm fat-free mass (left) | rs111640872 | 19 | 30290357 | C | G | 0.0129098 | 0.00134594 | 0.330602 | 8.70E-22 | 454672 |
| Arm fat-free mass (left) | rs11880992 | 19 | 2176403 | A | G | 0.0123396 | 0.00128458 | 0.408449 | 7.50E-22 | 454672 |
| Arm fat-free mass (left) | rs8109870 | 19 | 46972424 | T | G | 0.00793819 | 0.00145291 | 0.252353 | 4.70E-08 | 454672 |
| Arm fat-free mass (left) | rs10423120 | 19 | 17422036 | G | A | -0.0103533 | 0.00163053 | 0.184124 | 2.20E-10 | 454672 |
| Arm fat-free mass (left) | rs281385 | 19 | 49217261 | G | A | -0.012441 | 0.00193811 | 0.879218 | 1.40E-10 | 454672 |
| Arm fat-free mass (left) | rs2650965 | 20 | 6709838 | G | A | -0.00834194 | 0.00134718 | 0.329607 | 5.90E-10 | 454672 |
| Arm fat-free mass (left) | rs34879158 | 20 | 32300634 | C | A | -0.0194266 | 0.00143474 | 0.262796 | 9.10E-42 | 454672 |
| Arm fat-free mass (left) | rs6876 | 20 | 43535101 | C | T | 0.0114041 | 0.00206461 | 0.108826 | 3.30E-08 | 454672 |
| Arm fat-free mass (left) | rs6081869 | 20 | 20060745 | G | T | -0.00960939 | 0.00131369 | 0.385741 | 2.60E-13 | 454672 |
| Arm fat-free mass (left) | rs13037630 | 20 | 51143319 | T | C | -0.0193631 | 0.0016344 | 0.183007 | 2.20E-32 | 454672 |
| Arm fat-free mass (left) | rs6117348 | 20 | 6564919 | T | C | -0.00903358 | 0.00132613 | 0.642212 | 9.60E-12 | 454672 |
| Arm fat-free mass (left) | rs75514715 | 20 | 43080076 | C | T | -0.0125963 | 0.00228559 | 0.085219 | 3.60E-08 | 454672 |
| Arm fat-free mass (left) | rs6142059 | 20 | 32544327 | C | T | 0.0101235 | 0.00126461 | 0.49248 | 1.20E-15 | 454672 |
| Arm fat-free mass (left) | rs143384 | 20 | 34025756 | G | A | 0.0310916 | 0.00128433 | 0.404427 | 1.80E-129 | 454672 |
| Arm fat-free mass (left) | rs2252720 | 20 | 21223663 | T | C | -0.0132757 | 0.00135641 | 0.67408 | 1.30E-22 | 454672 |
| Arm fat-free mass (left) | rs1780672 | 20 | 35755818 | C | T | 0.0119996 | 0.0016132 | 0.811358 | 1.00E-13 | 454672 |
| Arm fat-free mass (left) | rs6026578 | 20 | 57463472 | G | C | -0.00875696 | 0.00131022 | 0.625142 | 2.30E-11 | 454672 |
| Arm fat-free mass (left) | rs73619441 | 20 | 61564901 | G | T | -0.0123727 | 0.00179967 | 0.144216 | 6.20E-12 | 454672 |
| Arm fat-free mass (left) | rs116165844 | 20 | 62610556 | T | G | -0.0105584 | 0.00183291 | 0.137481 | 8.40E-09 | 454672 |
| Arm fat-free mass (left) | rs13047416 | 21 | 40309436 | G | C | -0.0075374 | 0.00130818 | 0.376965 | 8.30E-09 | 454672 |
| Arm fat-free mass (left) | rs9976812 | 21 | 39690245 | G | C | -0.0112721 | 0.00128367 | 0.563668 | 1.60E-18 | 454672 |
| Arm fat-free mass (left) | rs2823565 | 21 | 17403204 | G | C | -0.00905172 | 0.00163829 | 0.186869 | 3.30E-08 | 454672 |
| Arm fat-free mass (left) | rs165656 | 22 | 19948863 | C | G | 0.00809051 | 0.00127339 | 0.517383 | 2.10E-10 | 454672 |
| Arm fat-free mass (left) | rs118173451 | 22 | 28356600 | C | T | -0.0283774 | 0.00508855 | 0.01615 | 2.50E-08 | 454672 |
| Arm fat-free mass (left) | rs5771118 | 22 | 50714289 | C | T | 0.00851609 | 0.00145196 | 0.741604 | 4.50E-09 | 454672 |
| Arm fat-free mass (left) | rs35665085 | 22 | 17625915 | A | G | -0.0156822 | 0.00274747 | 0.055968 | 1.10E-08 | 454672 |
| Arm fat-free mass (left) | rs4821940 | 22 | 40659573 | C | T | -0.00743856 | 0.00127275 | 0.549995 | 5.10E-09 | 454672 |
| Arm fat-free mass (left) | rs41311445 | 22 | 42070374 | C | A | -0.0241536 | 0.00214978 | 0.095784 | 2.70E-29 | 454672 |
| Arm fat-free mass (left) | rs113619763 | 22 | 46399175 | T | A | 0.016446 | 0.0026141 | 0.062479 | 3.10E-10 | 454672 |
| Arm fat-free mass (left) | rs5752989 | 22 | 30365780 | A | G | -0.00957138 | 0.001277 | 0.571154 | 6.60E-14 | 454672 |
| Arm fat-free mass (left) | rs5753630 | 22 | 31861950 | G | A | 0.00778672 | 0.00127709 | 0.439487 | 1.10E-09 | 454672 |

**Table S2.F Summary of the SNPs (after clumping process) associated with fat-free mass of right arm (per SD increase)**

| **exposure** | **SNP** | **chromosome** | **position** | **effect_allele** | **other_allele** | **beta** | **se** | **eaf** | **pval** | **samplesize** |
| --- | --- | --- | --- | --- | --- | --- | --- | --- | --- | --- |
| Arm fat-free mass (right) | rs226250 | 1 | 8022171 | T | C | -0.00836337 | 0.00125779 | 0.406374 | 2.90E-11 | 454753 |
| Arm fat-free mass (right) | rs7542242 | 1 | 22477493 | T | C | -0.00865437 | 0.00132709 | 0.32943 | 7.00E-11 | 454753 |
| Arm fat-free mass (right) | rs2783712 | 1 | 26429344 | C | A | 0.0138866 | 0.00163596 | 0.173534 | 2.10E-17 | 454753 |
| Arm fat-free mass (right) | rs652112 | 1 | 32345980 | C | T | 0.01725 | 0.00200601 | 0.105263 | 8.00E-18 | 454753 |
| Arm fat-free mass (right) | rs71647469 | 1 | 65366509 | T | C | 0.0362196 | 0.00577724 | 0.012532 | 3.60E-10 | 454753 |
| Arm fat-free mass (right) | rs34517439 | 1 | 78450517 | A | C | 0.0336943 | 0.00190608 | 0.121685 | 6.30E-70 | 454753 |
| Arm fat-free mass (right) | rs60804050 | 1 | 118870373 | A | G | -0.0105373 | 0.00140916 | 0.255881 | 7.60E-14 | 454753 |
| Arm fat-free mass (right) | rs76798800 | 1 | 154994978 | T | G | 0.0205693 | 0.00139572 | 0.265996 | 3.70E-49 | 454753 |
| Arm fat-free mass (right) | rs7513326 | 1 | 159895536 | A | G | -0.00706334 | 0.00125264 | 0.508356 | 1.70E-08 | 454753 |
| Arm fat-free mass (right) | rs1022523 | 1 | 176788394 | A | G | 0.0156354 | 0.00138435 | 0.726855 | 1.40E-29 | 454753 |
| Arm fat-free mass (right) | rs527248 | 1 | 177875514 | G | A | 0.0222924 | 0.0015138 | 0.209123 | 4.40E-49 | 454753 |
| Arm fat-free mass (right) | rs10920678 | 1 | 190239907 | G | A | -0.00841453 | 0.00124207 | 0.562649 | 1.20E-11 | 454753 |
| Arm fat-free mass (right) | rs12354311 | 1 | 224640099 | C | A | -0.00733494 | 0.00134158 | 0.305785 | 4.60E-08 | 454753 |
| Arm fat-free mass (right) | rs74598702 | 1 | 228622065 | T | C | -0.0156972 | 0.00212866 | 0.092849 | 1.70E-13 | 454753 |
| Arm fat-free mass (right) | rs72660086 | 1 | 39571992 | G | T | 0.0110654 | 0.00151184 | 0.211408 | 2.50E-13 | 454753 |
| Arm fat-free mass (right) | rs12731454 | 1 | 97067652 | G | A | 0.0105939 | 0.0013381 | 0.309224 | 2.40E-15 | 454753 |
| Arm fat-free mass (right) | rs17277008 | 1 | 172105162 | C | T | 0.0139334 | 0.00132677 | 0.313436 | 8.50E-26 | 454753 |
| Arm fat-free mass (right) | rs3850625 | 1 | 201016296 | A | G | -0.0188146 | 0.0019057 | 0.118162 | 5.50E-23 | 454753 |
| Arm fat-free mass (right) | rs12048049 | 1 | 218597297 | G | C | 0.0124103 | 0.00136008 | 0.287492 | 7.20E-20 | 454753 |
| Arm fat-free mass (right) | rs903908 | 1 | 2202967 | C | T | 0.00832461 | 0.00123739 | 0.509443 | 1.70E-11 | 454753 |
| Arm fat-free mass (right) | rs10798945 | 1 | 33858873 | T | C | 0.0118798 | 0.00142682 | 0.751343 | 8.40E-17 | 454753 |
| Arm fat-free mass (right) | rs272815 | 1 | 36648011 | C | T | 0.00750338 | 0.00124823 | 0.580017 | 1.80E-09 | 454753 |
| Arm fat-free mass (right) | rs12095997 | 1 | 51391845 | T | C | 0.0189927 | 0.00215755 | 0.08926 | 1.30E-18 | 454753 |
| Arm fat-free mass (right) | rs17363646 | 1 | 86823503 | G | A | 0.0120913 | 0.00179543 | 0.135701 | 1.60E-11 | 454753 |
| Arm fat-free mass (right) | rs903678 | 1 | 201809918 | A | G | 0.0115494 | 0.00130125 | 0.33699 | 7.00E-19 | 454753 |
| Arm fat-free mass (right) | rs823118 | 1 | 205723572 | T | C | -0.0123676 | 0.00123604 | 0.547632 | 1.40E-23 | 454753 |
| Arm fat-free mass (right) | rs3790731 | 1 | 217795891 | A | T | 0.00882197 | 0.00125949 | 0.396945 | 2.50E-12 | 454753 |
| Arm fat-free mass (right) | rs6659660 | 1 | 225962333 | G | A | 0.00808618 | 0.00133363 | 0.681617 | 1.30E-09 | 454753 |
| Arm fat-free mass (right) | rs2885697 | 1 | 41544279 | T | G | -0.0181176 | 0.00130345 | 0.665226 | 6.40E-44 | 454753 |
| Arm fat-free mass (right) | rs12140153 | 1 | 62579891 | T | G | -0.0150845 | 0.00216014 | 0.094278 | 2.90E-12 | 454753 |
| Arm fat-free mass (right) | rs6690871 | 1 | 74977277 | G | A | 0.00771458 | 0.00126144 | 0.406761 | 9.60E-10 | 454753 |
| Arm fat-free mass (right) | rs3879448 | 1 | 109891423 | C | G | -0.0085013 | 0.00135637 | 0.7097 | 3.70E-10 | 454753 |
| Arm fat-free mass (right) | rs7535501 | 1 | 176462695 | T | C | -0.0148597 | 0.00268119 | 0.943948 | 3.00E-08 | 454753 |
| Arm fat-free mass (right) | rs2789366 | 1 | 235508270 | A | G | -0.00845353 | 0.0012939 | 0.346273 | 6.40E-11 | 454753 |
| Arm fat-free mass (right) | rs2295363 | 1 | 1850428 | G | A | 0.00971761 | 0.00124064 | 0.547666 | 4.80E-15 | 454753 |
| Arm fat-free mass (right) | rs67373773 | 1 | 2710377 | A | G | -0.00731288 | 0.00124122 | 0.439103 | 3.80E-09 | 454753 |
| Arm fat-free mass (right) | rs1205593 | 1 | 11252716 | C | T | -0.0140607 | 0.00144255 | 0.759345 | 1.90E-22 | 454753 |
| Arm fat-free mass (right) | rs11590433 | 1 | 21505827 | G | A | 0.00883025 | 0.00129476 | 0.64889 | 9.10E-12 | 454753 |
| Arm fat-free mass (right) | rs28605759 | 1 | 38399816 | A | G | -0.00705041 | 0.00123592 | 0.454332 | 1.20E-08 | 454753 |
| Arm fat-free mass (right) | rs4926542 | 1 | 50263773 | T | C | -0.00945281 | 0.00133097 | 0.682114 | 1.20E-12 | 454753 |
| Arm fat-free mass (right) | rs6669139 | 1 | 56583110 | T | C | 0.013486 | 0.00151881 | 0.208723 | 6.70E-19 | 454753 |
| Arm fat-free mass (right) | rs12726084 | 1 | 72649154 | T | C | -0.0127508 | 0.00152606 | 0.2039 | 6.50E-17 | 454753 |
| Arm fat-free mass (right) | rs72697614 | 1 | 107514107 | A | C | 0.00825601 | 0.00133698 | 0.319833 | 6.60E-10 | 454753 |
| Arm fat-free mass (right) | rs10749659 | 1 | 151033979 | T | C | -0.00973031 | 0.00146942 | 0.772423 | 3.50E-11 | 454753 |
| Arm fat-free mass (right) | rs6675441 | 1 | 214659762 | A | G | -0.011416 | 0.00147711 | 0.233606 | 1.10E-14 | 454753 |
| Arm fat-free mass (right) | rs59985551 | 2 | 56106928 | T | C | -0.0136642 | 0.00147063 | 0.226241 | 1.50E-20 | 454753 |
| Arm fat-free mass (right) | rs6733029 | 2 | 68434157 | C | T | -0.0106394 | 0.00126304 | 0.392735 | 3.60E-17 | 454753 |
| Arm fat-free mass (right) | rs1528450 | 2 | 181517642 | C | T | 0.00799432 | 0.00127376 | 0.597052 | 3.50E-10 | 454753 |
| Arm fat-free mass (right) | rs11684531 | 2 | 219835489 | G | A | -0.01124 | 0.00181397 | 0.132773 | 5.80E-10 | 454753 |
| Arm fat-free mass (right) | rs17246129 | 2 | 227259964 | A | G | 0.0117239 | 0.00133997 | 0.304774 | 2.10E-18 | 454753 |
| Arm fat-free mass (right) | rs3116201 | 2 | 233074205 | A | G | -0.0175262 | 0.00207514 | 0.097861 | 3.00E-17 | 454753 |
| Arm fat-free mass (right) | rs6721191 | 2 | 10190115 | G | A | -0.00812541 | 0.00124688 | 0.577893 | 7.20E-11 | 454753 |
| Arm fat-free mass (right) | rs4671197 | 2 | 67952811 | C | T | -0.0073485 | 0.00133295 | 0.688271 | 3.50E-08 | 454753 |
| Arm fat-free mass (right) | rs2871392 | 2 | 101716400 | C | T | -0.00721419 | 0.0013151 | 0.325167 | 4.10E-08 | 454753 |
| Arm fat-free mass (right) | rs13392139 | 2 | 121578767 | G | A | -0.01441 | 0.00250184 | 0.065594 | 8.40E-09 | 454753 |
| Arm fat-free mass (right) | rs10931008 | 2 | 183238919 | C | T | -0.0109589 | 0.00129928 | 0.343406 | 3.30E-17 | 454753 |
| Arm fat-free mass (right) | rs1047891 | 2 | 211540507 | A | C | 0.0156344 | 0.00132354 | 0.315859 | 3.40E-32 | 454753 |
| Arm fat-free mass (right) | rs13430869 | 2 | 218146818 | T | G | 0.0126333 | 0.00140837 | 0.741815 | 3.00E-19 | 454753 |
| Arm fat-free mass (right) | rs1542224 | 2 | 223963874 | C | T | 0.0111646 | 0.00137184 | 0.718943 | 4.00E-16 | 454753 |
| Arm fat-free mass (right) | rs77165542 | 2 | 430975 | T | C | -0.0525335 | 0.00336835 | 0.035479 | 7.70E-55 | 454753 |
| Arm fat-free mass (right) | rs112544217 | 2 | 20222686 | T | C | -0.0235752 | 0.00428767 | 0.022146 | 3.80E-08 | 454753 |
| Arm fat-free mass (right) | rs343954 | 2 | 44999709 | C | T | 0.0114239 | 0.00164336 | 0.171753 | 3.60E-12 | 454753 |
| Arm fat-free mass (right) | rs17049820 | 2 | 59139507 | C | T | -0.0107718 | 0.00195971 | 0.112979 | 3.90E-08 | 454753 |
| Arm fat-free mass (right) | rs7581335 | 2 | 143958864 | T | A | 0.0110256 | 0.0017717 | 0.140538 | 4.90E-10 | 454753 |
| Arm fat-free mass (right) | rs12694042 | 2 | 207029825 | T | C | -0.00897652 | 0.00123669 | 0.501748 | 3.90E-13 | 454753 |
| Arm fat-free mass (right) | rs1478575 | 2 | 218278555 | A | T | 0.0151889 | 0.0013269 | 0.684068 | 2.40E-30 | 454753 |
| Arm fat-free mass (right) | rs1260326 | 2 | 27730940 | C | T | 0.0182554 | 0.00125765 | 0.604221 | 9.70E-48 | 454753 |
| Arm fat-free mass (right) | rs115179432 | 2 | 33348679 | G | A | -0.021273 | 0.00239598 | 0.071972 | 6.80E-19 | 454753 |
| Arm fat-free mass (right) | rs1374370 | 2 | 85818273 | A | G | 0.0096636 | 0.0013379 | 0.305268 | 5.10E-13 | 454753 |
| Arm fat-free mass (right) | rs13026283 | 2 | 100842638 | T | C | -0.00689116 | 0.0012626 | 0.393235 | 4.80E-08 | 454753 |
| Arm fat-free mass (right) | rs6719296 | 2 | 103101108 | A | G | 0.00817922 | 0.00123885 | 0.495341 | 4.00E-11 | 454753 |
| Arm fat-free mass (right) | rs6747657 | 2 | 112003163 | A | G | 0.00753346 | 0.00136776 | 0.28164 | 3.60E-08 | 454753 |
| Arm fat-free mass (right) | rs62160072 | 2 | 128912223 | T | C | 0.00893027 | 0.00154631 | 0.198796 | 7.70E-09 | 454753 |
| Arm fat-free mass (right) | rs13392079 | 2 | 169119178 | C | T | -0.00862761 | 0.00143487 | 0.755901 | 1.80E-09 | 454753 |
| Arm fat-free mass (right) | rs72885917 | 2 | 172416376 | C | A | -0.0180382 | 0.00142536 | 0.247472 | 1.00E-36 | 454753 |
| Arm fat-free mass (right) | rs1064213 | 2 | 198950240 | A | G | 0.0123036 | 0.00123249 | 0.478356 | 1.80E-23 | 454753 |
| Arm fat-free mass (right) | rs17443541 | 2 | 200402624 | C | T | -0.0110301 | 0.00158766 | 0.189372 | 3.70E-12 | 454753 |
| Arm fat-free mass (right) | rs6435153 | 2 | 203292039 | T | C | -0.0112242 | 0.00205157 | 0.100803 | 4.50E-08 | 454753 |
| Arm fat-free mass (right) | rs2197563 | 2 | 233687080 | A | G | 0.00974222 | 0.00125611 | 0.594863 | 8.80E-15 | 454753 |
| Arm fat-free mass (right) | rs10170971 | 2 | 242492779 | C | G | -0.00859591 | 0.00123696 | 0.50244 | 3.70E-12 | 454753 |
| Arm fat-free mass (right) | rs12995666 | 2 | 629959 | C | T | 0.0315765 | 0.00163244 | 0.827909 | 2.30E-83 | 454753 |
| Arm fat-free mass (right) | rs12713004 | 2 | 23896049 | G | A | 0.0163882 | 0.00138043 | 0.724932 | 1.70E-32 | 454753 |
| Arm fat-free mass (right) | rs2372604 | 2 | 36820390 | T | G | 0.00809179 | 0.00129408 | 0.380337 | 4.00E-10 | 454753 |
| Arm fat-free mass (right) | rs10170082 | 2 | 42623452 | C | T | -0.0150793 | 0.00183152 | 0.130369 | 1.80E-16 | 454753 |
| Arm fat-free mass (right) | rs4852257 | 2 | 71678520 | G | T | -0.0100806 | 0.00125144 | 0.576288 | 7.90E-16 | 454753 |
| Arm fat-free mass (right) | rs13001657 | 2 | 88946611 | A | G | 0.00965615 | 0.00135398 | 0.293783 | 9.90E-13 | 454753 |
| Arm fat-free mass (right) | rs74684058 | 2 | 145616054 | T | C | 0.0155383 | 0.00241693 | 0.070064 | 1.30E-10 | 454753 |
| Arm fat-free mass (right) | rs2140046 | 2 | 169706079 | C | T | -0.0111688 | 0.00128056 | 0.363503 | 2.70E-18 | 454753 |
| Arm fat-free mass (right) | rs2270894 | 3 | 9975386 | G | C | -0.0144362 | 0.00159127 | 0.203275 | 1.20E-19 | 454753 |
| Arm fat-free mass (right) | rs1470571 | 3 | 77565844 | T | C | -0.0079361 | 0.00136822 | 0.714723 | 6.60E-09 | 454753 |
| Arm fat-free mass (right) | rs2875907 | 3 | 85518580 | G | A | -0.0132847 | 0.00129009 | 0.647147 | 7.20E-25 | 454753 |
| Arm fat-free mass (right) | rs4858940 | 3 | 88254820 | C | T | 0.0157032 | 0.00193722 | 0.885533 | 5.20E-16 | 454753 |
| Arm fat-free mass (right) | rs6762578 | 3 | 128992047 | A | G | 0.0143856 | 0.00149134 | 0.7784 | 5.10E-22 | 454753 |
| Arm fat-free mass (right) | rs4407387 | 3 | 152331086 | C | G | 0.00807956 | 0.00129702 | 0.342834 | 4.70E-10 | 454753 |
| Arm fat-free mass (right) | rs2569993 | 3 | 12926096 | C | T | 0.00780013 | 0.0013264 | 0.320254 | 4.10E-09 | 454753 |
| Arm fat-free mass (right) | rs7619139 | 3 | 25110415 | A | T | 0.00994874 | 0.0012567 | 0.588636 | 2.40E-15 | 454753 |
| Arm fat-free mass (right) | rs7633464 | 3 | 98715823 | A | G | 0.00964395 | 0.00123421 | 0.478315 | 5.50E-15 | 454753 |
| Arm fat-free mass (right) | rs357486 | 3 | 153885503 | C | T | 0.00969048 | 0.00123725 | 0.54336 | 4.80E-15 | 454753 |
| Arm fat-free mass (right) | rs6800021 | 3 | 50190346 | A | G | 0.0146519 | 0.00124892 | 0.424711 | 8.80E-32 | 454753 |
| Arm fat-free mass (right) | rs11717749 | 3 | 52844733 | T | C | 0.0147382 | 0.00193259 | 0.114622 | 2.40E-14 | 454753 |
| Arm fat-free mass (right) | rs17056859 | 3 | 56535107 | A | G | 0.00789425 | 0.00132602 | 0.683239 | 2.60E-09 | 454753 |
| Arm fat-free mass (right) | rs11925245 | 3 | 114183579 | G | A | -0.0092266 | 0.00161289 | 0.182841 | 1.10E-08 | 454753 |
| Arm fat-free mass (right) | rs724016 | 3 | 141105570 | G | A | 0.0267289 | 0.00124064 | 0.443676 | 6.00E-103 | 454753 |
| Arm fat-free mass (right) | rs509035 | 3 | 172163449 | A | G | 0.0161739 | 0.00132636 | 0.315593 | 3.30E-34 | 454753 |
| Arm fat-free mass (right) | rs10084690 | 3 | 33591384 | C | A | 0.0211889 | 0.00335055 | 0.035277 | 2.50E-10 | 454753 |
| Arm fat-free mass (right) | rs3749387 | 3 | 38496193 | C | G | 0.0125146 | 0.00124491 | 0.530063 | 8.90E-24 | 454753 |
| Arm fat-free mass (right) | rs4974223 | 3 | 56602088 | T | C | 0.0145173 | 0.00209117 | 0.90375 | 3.90E-12 | 454753 |
| Arm fat-free mass (right) | rs75451531 | 3 | 61187422 | T | C | -0.0118692 | 0.00174317 | 0.14654 | 9.80E-12 | 454753 |
| Arm fat-free mass (right) | rs4677151 | 3 | 72394027 | A | G | -0.00759601 | 0.00124023 | 0.505278 | 9.10E-10 | 454753 |
| Arm fat-free mass (right) | rs1394046 | 3 | 147059025 | T | A | -0.00909662 | 0.001434 | 0.753309 | 2.20E-10 | 454753 |
| Arm fat-free mass (right) | rs843374 | 3 | 183997261 | T | A | -0.00966457 | 0.00125373 | 0.587168 | 1.30E-14 | 454753 |
| Arm fat-free mass (right) | rs73175572 | 3 | 185490184 | G | A | 0.0253127 | 0.00197866 | 0.111717 | 1.80E-37 | 454753 |
| Arm fat-free mass (right) | rs11709402 | 3 | 131551027 | G | A | 0.00918057 | 0.00138049 | 0.278624 | 2.90E-11 | 454753 |
| Arm fat-free mass (right) | rs10936684 | 3 | 171130793 | A | G | -0.00805174 | 0.00131421 | 0.65983 | 9.00E-10 | 454753 |
| Arm fat-free mass (right) | rs9790159 | 3 | 171908032 | G | A | -0.0105346 | 0.0012548 | 0.53046 | 4.60E-17 | 454753 |
| Arm fat-free mass (right) | rs73052033 | 3 | 185828465 | C | T | -0.0143285 | 0.00159109 | 0.185073 | 2.10E-19 | 454753 |
| Arm fat-free mass (right) | rs62325220 | 4 | 54295227 | C | G | -0.014032 | 0.00173429 | 0.149207 | 5.90E-16 | 454753 |
| Arm fat-free mass (right) | rs10020631 | 4 | 69353863 | A | G | -0.0078427 | 0.00143536 | 0.248002 | 4.70E-08 | 454753 |
| Arm fat-free mass (right) | rs140493137 | 4 | 87666916 | A | G | 0.0189487 | 0.00260891 | 0.060122 | 3.80E-13 | 454753 |
| Arm fat-free mass (right) | rs2101975 | 4 | 106216667 | G | A | -0.0136145 | 0.0012495 | 0.432211 | 1.20E-27 | 454753 |
| Arm fat-free mass (right) | rs12498374 | 4 | 111584419 | T | C | 0.00867348 | 0.00153761 | 0.20506 | 1.70E-08 | 454753 |
| Arm fat-free mass (right) | rs1296328 | 4 | 137083193 | C | A | -0.00853869 | 0.00124882 | 0.558984 | 8.10E-12 | 454753 |
| Arm fat-free mass (right) | rs981002 | 4 | 12881731 | A | T | -0.0098965 | 0.00139563 | 0.267103 | 1.30E-12 | 454753 |
| Arm fat-free mass (right) | rs1472852 | 4 | 17910236 | A | C | -0.0294761 | 0.00168695 | 0.158523 | 2.30E-68 | 454753 |
| Arm fat-free mass (right) | rs17556750 | 4 | 82155568 | A | C | 0.011696 | 0.00136269 | 0.288359 | 9.20E-18 | 454753 |
| Arm fat-free mass (right) | rs1841738 | 4 | 88557753 | G | A | -0.0111462 | 0.00124204 | 0.518114 | 2.90E-19 | 454753 |
| Arm fat-free mass (right) | rs6824633 | 4 | 111019965 | T | C | 0.00727596 | 0.00129314 | 0.353406 | 1.80E-08 | 454753 |
| Arm fat-free mass (right) | rs11098675 | 4 | 123832776 | G | A | -0.0147428 | 0.00155963 | 0.806233 | 3.30E-21 | 454753 |
| Arm fat-free mass (right) | rs9985795 | 4 | 135213286 | C | T | -0.00751005 | 0.00123822 | 0.482762 | 1.30E-09 | 454753 |
| Arm fat-free mass (right) | rs111391498 | 4 | 1341553 | G | A | -0.0234943 | 0.00289672 | 0.047495 | 5.00E-16 | 454753 |
| Arm fat-free mass (right) | rs10222924 | 4 | 49016761 | G | A | -0.00960763 | 0.00135057 | 0.699347 | 1.10E-12 | 454753 |
| Arm fat-free mass (right) | rs11097755 | 4 | 102709308 | C | T | 0.00744602 | 0.00124156 | 0.443073 | 2.00E-09 | 454753 |
| Arm fat-free mass (right) | rs72703409 | 4 | 184225295 | C | G | -0.0138502 | 0.00249599 | 0.065546 | 2.90E-08 | 454753 |
| Arm fat-free mass (right) | rs73213484 | 4 | 28489339 | T | A | -0.0117449 | 0.00177304 | 0.141225 | 3.50E-11 | 454753 |
| Arm fat-free mass (right) | rs7669124 | 4 | 31019816 | A | G | 0.00889972 | 0.00128364 | 0.36614 | 4.10E-12 | 454753 |
| Arm fat-free mass (right) | rs10938398 | 4 | 45186139 | A | G | 0.0114365 | 0.00124801 | 0.43351 | 5.00E-20 | 454753 |
| Arm fat-free mass (right) | rs35339719 | 4 | 57759537 | A | G | -0.00822449 | 0.00137599 | 0.280114 | 2.30E-09 | 454753 |
| Arm fat-free mass (right) | rs4240326 | 4 | 145839264 | G | A | -0.0194423 | 0.0012398 | 0.550156 | 2.00E-55 | 454753 |
| Arm fat-free mass (right) | rs798759 | 4 | 1730299 | G | A | -0.00847906 | 0.0012344 | 0.463634 | 6.50E-12 | 454753 |
| Arm fat-free mass (right) | rs4426714 | 4 | 4934599 | C | G | 0.00856298 | 0.00127982 | 0.37779 | 2.20E-11 | 454753 |
| Arm fat-free mass (right) | rs6821305 | 4 | 122713863 | C | A | 0.0114239 | 0.00125942 | 0.399244 | 1.20E-19 | 454753 |
| Arm fat-free mass (right) | rs36089326 | 4 | 160028812 | T | A | 0.00813842 | 0.00131463 | 0.327042 | 6.00E-10 | 454753 |
| Arm fat-free mass (right) | rs11739036 | 5 | 32723478 | A | G | -0.0104345 | 0.00134242 | 0.342502 | 7.70E-15 | 454753 |
| Arm fat-free mass (right) | rs2307111 | 5 | 75003678 | C | T | -0.0162632 | 0.00126305 | 0.395091 | 6.10E-38 | 454753 |
| Arm fat-free mass (right) | rs9327336 | 5 | 123990270 | C | T | 0.00871569 | 0.00129931 | 0.343071 | 2.00E-11 | 454753 |
| Arm fat-free mass (right) | rs31210 | 5 | 134361020 | A | G | -0.0116646 | 0.00142256 | 0.252791 | 2.40E-16 | 454753 |
| Arm fat-free mass (right) | rs1990657 | 5 | 171220503 | C | T | -0.00817484 | 0.00124931 | 0.428358 | 6.00E-11 | 454753 |
| Arm fat-free mass (right) | rs6874142 | 5 | 172753555 | G | T | 0.0148569 | 0.00205734 | 0.113716 | 5.10E-13 | 454753 |
| Arm fat-free mass (right) | rs10058393 | 5 | 277617 | T | C | 0.0107453 | 0.00184091 | 0.129089 | 5.30E-09 | 454753 |
| Arm fat-free mass (right) | rs12657771 | 5 | 36787962 | A | G | -0.0120001 | 0.00124946 | 0.438674 | 7.70E-22 | 454753 |
| Arm fat-free mass (right) | rs9291926 | 5 | 67599656 | G | T | -0.0109693 | 0.00123758 | 0.531829 | 7.80E-19 | 454753 |
| Arm fat-free mass (right) | rs10515237 | 5 | 95751549 | G | A | 0.0123673 | 0.00137242 | 0.281866 | 2.00E-19 | 454753 |
| Arm fat-free mass (right) | rs2952615 | 5 | 112138888 | C | G | -0.0114675 | 0.00127075 | 0.617532 | 1.80E-19 | 454753 |
| Arm fat-free mass (right) | rs1582931 | 5 | 122657199 | A | G | -0.0166506 | 0.00124651 | 0.47325 | 1.10E-40 | 454753 |
| Arm fat-free mass (right) | rs115053453 | 5 | 130570345 | G | A | -0.0122143 | 0.00168291 | 0.161016 | 3.90E-13 | 454753 |
| Arm fat-free mass (right) | rs2422054 | 5 | 161382474 | A | T | 0.0081806 | 0.00127986 | 0.631029 | 1.60E-10 | 454753 |
| Arm fat-free mass (right) | rs244711 | 5 | 176509193 | T | C | 0.0156304 | 0.00142659 | 0.685817 | 6.20E-28 | 454753 |
| Arm fat-free mass (right) | rs62372052 | 5 | 42724294 | G | A | 0.0253967 | 0.0019785 | 0.110087 | 1.00E-37 | 454753 |
| Arm fat-free mass (right) | rs12188627 | 5 | 60720682 | G | A | -0.00924061 | 0.00123444 | 0.487756 | 7.10E-14 | 454753 |
| Arm fat-free mass (right) | rs61749613 | 5 | 82815170 | G | A | 0.0274164 | 0.00309371 | 0.041388 | 7.90E-19 | 454753 |
| Arm fat-free mass (right) | rs6898801 | 5 | 111250615 | G | A | -0.00841798 | 0.0013059 | 0.657822 | 1.10E-10 | 454753 |
| Arm fat-free mass (right) | rs3822742 | 5 | 139059017 | A | C | 0.0116497 | 0.00128073 | 0.371028 | 9.40E-20 | 454753 |
| Arm fat-free mass (right) | rs55758152 | 5 | 171317318 | A | G | 0.008939 | 0.00133204 | 0.325975 | 1.90E-11 | 454753 |
| Arm fat-free mass (right) | rs10062079 | 5 | 39393733 | A | G | 0.0076439 | 0.00125161 | 0.424681 | 1.00E-09 | 454753 |
| Arm fat-free mass (right) | rs6450346 | 5 | 55014771 | C | T | -0.0108476 | 0.00134919 | 0.701337 | 9.00E-16 | 454753 |
| Arm fat-free mass (right) | rs9800418 | 5 | 77641008 | C | T | 0.00879957 | 0.00144198 | 0.244709 | 1.00E-09 | 454753 |
| Arm fat-free mass (right) | rs35267052 | 5 | 87949118 | G | T | 0.0140305 | 0.00203317 | 0.103011 | 5.20E-12 | 454753 |
| Arm fat-free mass (right) | rs7708460 | 5 | 134579904 | A | G | -0.00713443 | 0.00124746 | 0.435798 | 1.10E-08 | 454753 |
| Arm fat-free mass (right) | rs17115481 | 5 | 153358226 | A | G | -0.00845926 | 0.00139309 | 0.269711 | 1.30E-09 | 454753 |
| Arm fat-free mass (right) | rs252938 | 5 | 5496480 | T | C | -0.00923502 | 0.00130466 | 0.648982 | 1.50E-12 | 454753 |
| Arm fat-free mass (right) | rs10041126 | 5 | 52813119 | C | A | 0.00740189 | 0.00127476 | 0.602862 | 6.40E-09 | 454753 |
| Arm fat-free mass (right) | rs365352 | 5 | 77401152 | A | G | -0.0132919 | 0.00143312 | 0.244452 | 1.80E-20 | 454753 |
| Arm fat-free mass (right) | rs7442885 | 5 | 87682877 | G | C | -0.0164894 | 0.00150674 | 0.214122 | 7.10E-28 | 454753 |
| Arm fat-free mass (right) | rs4282339 | 5 | 168256240 | A | G | -0.0180171 | 0.00151808 | 0.207606 | 1.70E-32 | 454753 |
| Arm fat-free mass (right) | rs111365325 | 5 | 170865229 | T | C | -0.0129982 | 0.00146591 | 0.231333 | 7.50E-19 | 454753 |
| Arm fat-free mass (right) | rs9379084 | 6 | 7231843 | A | G | -0.0163948 | 0.00198614 | 0.115559 | 1.50E-16 | 454753 |
| Arm fat-free mass (right) | rs2814993 | 6 | 34618893 | A | G | 0.035031 | 0.00177381 | 0.139754 | 8.20E-87 | 454753 |
| Arm fat-free mass (right) | rs2395792 | 6 | 41852187 | G | T | -0.0272427 | 0.00306237 | 0.955638 | 5.80E-19 | 454753 |
| Arm fat-free mass (right) | rs114056237 | 6 | 41877671 | A | G | -0.0525653 | 0.00555388 | 0.012447 | 2.90E-21 | 454753 |
| Arm fat-free mass (right) | rs9350850 | 6 | 81050236 | C | T | 0.0218299 | 0.00227754 | 0.079501 | 9.30E-22 | 454753 |
| Arm fat-free mass (right) | rs10943915 | 6 | 83617970 | T | A | 0.00786204 | 0.00135533 | 0.297327 | 6.60E-09 | 454753 |
| Arm fat-free mass (right) | rs9372414 | 6 | 97764299 | T | C | -0.00717351 | 0.00129703 | 0.347614 | 3.20E-08 | 454753 |
| Arm fat-free mass (right) | rs7755185 | 6 | 152339615 | G | A | 0.00798385 | 0.00133258 | 0.311115 | 2.10E-09 | 454753 |
| Arm fat-free mass (right) | rs9380508 | 6 | 35398689 | T | C | 0.0111007 | 0.00147767 | 0.775065 | 5.80E-14 | 454753 |
| Arm fat-free mass (right) | rs72892910 | 6 | 50816887 | T | G | 0.0196182 | 0.00163447 | 0.172212 | 3.40E-33 | 454753 |
| Arm fat-free mass (right) | rs5019542 | 6 | 51738352 | T | C | -0.00725029 | 0.00128159 | 0.636321 | 1.50E-08 | 454753 |
| Arm fat-free mass (right) | rs180963 | 6 | 101127213 | C | T | -0.00830473 | 0.00123552 | 0.512097 | 1.80E-11 | 454753 |
| Arm fat-free mass (right) | rs9388446 | 6 | 126064920 | A | T | 0.0133737 | 0.0012347 | 0.515597 | 2.40E-27 | 454753 |
| Arm fat-free mass (right) | rs12216497 | 6 | 19028623 | T | C | -0.0110836 | 0.00124398 | 0.561029 | 5.10E-19 | 454753 |
| Arm fat-free mass (right) | rs62396185 | 6 | 26180634 | C | G | -0.0202431 | 0.0014057 | 0.260011 | 5.10E-47 | 454753 |
| Arm fat-free mass (right) | rs1418433 | 6 | 44752568 | A | G | -0.00759634 | 0.00125254 | 0.587636 | 1.30E-09 | 454753 |
| Arm fat-free mass (right) | rs578366 | 6 | 81591034 | G | A | -0.0101493 | 0.00124729 | 0.420386 | 4.10E-16 | 454753 |
| Arm fat-free mass (right) | rs9388498 | 6 | 126873423 | T | G | 0.0160062 | 0.00162655 | 0.185965 | 7.50E-23 | 454753 |
| Arm fat-free mass (right) | rs7740107 | 6 | 130374461 | A | T | -0.0276178 | 0.00139759 | 0.736357 | 6.50E-87 | 454753 |
| Arm fat-free mass (right) | rs603321 | 6 | 140256669 | G | A | -0.0127672 | 0.00144103 | 0.244486 | 8.00E-19 | 454753 |
| Arm fat-free mass (right) | rs2457982 | 6 | 166313684 | A | G | 0.00914783 | 0.00138663 | 0.279339 | 4.20E-11 | 454753 |
| Arm fat-free mass (right) | rs11243202 | 6 | 7719065 | C | T | 0.0178899 | 0.00123801 | 0.485934 | 2.50E-47 | 454753 |
| Arm fat-free mass (right) | rs7766034 | 6 | 19753061 | T | C | -0.00808174 | 0.00124975 | 0.426099 | 1.00E-10 | 454753 |
| Arm fat-free mass (right) | rs12175489 | 6 | 31377587 | A | G | -0.0137786 | 0.00194556 | 0.118739 | 1.40E-12 | 454753 |
| Arm fat-free mass (right) | rs62405860 | 6 | 33459829 | C | T | 0.00947043 | 0.00143348 | 0.24412 | 3.90E-11 | 454753 |
| Arm fat-free mass (right) | rs12211255 | 6 | 76188330 | A | C | 0.0142264 | 0.00202965 | 0.103598 | 2.40E-12 | 454753 |
| Arm fat-free mass (right) | rs17069647 | 6 | 108917688 | A | T | -0.0119121 | 0.00211547 | 0.093812 | 1.80E-08 | 454753 |
| Arm fat-free mass (right) | rs6570509 | 6 | 142716286 | T | G | -0.0126584 | 0.00136181 | 0.287102 | 1.50E-20 | 454753 |
| Arm fat-free mass (right) | rs3853252 | 6 | 152170247 | A | G | 0.0136569 | 0.00124327 | 0.45487 | 4.50E-28 | 454753 |
| Arm fat-free mass (right) | rs56017587 | 6 | 18698092 | C | T | 0.0105233 | 0.00180286 | 0.137038 | 5.30E-09 | 454753 |
| Arm fat-free mass (right) | rs41271299 | 6 | 19839415 | T | C | 0.0377192 | 0.00279284 | 0.051246 | 1.40E-41 | 454753 |
| Arm fat-free mass (right) | rs3130481 | 6 | 31839756 | C | G | -0.0152964 | 0.00123207 | 0.512801 | 2.20E-35 | 454753 |
| Arm fat-free mass (right) | rs4946936 | 6 | 109003321 | C | T | 0.0205431 | 0.00137346 | 0.712581 | 1.40E-50 | 454753 |
| Arm fat-free mass (right) | rs11153171 | 6 | 109653825 | T | C | -0.0117971 | 0.00129201 | 0.356045 | 6.80E-20 | 454753 |
| Arm fat-free mass (right) | rs6923431 | 6 | 129824754 | C | A | 0.00769646 | 0.00138255 | 0.734345 | 2.60E-08 | 454753 |
| Arm fat-free mass (right) | rs687694 | 6 | 153472227 | G | T | -0.00783745 | 0.0012386 | 0.495475 | 2.50E-10 | 454753 |
| Arm fat-free mass (right) | rs9457777 | 6 | 160352921 | C | T | 0.00951742 | 0.00146613 | 0.227717 | 8.50E-11 | 454753 |
| Arm fat-free mass (right) | rs3099282 | 6 | 166584842 | G | A | -0.00920066 | 0.00151938 | 0.208416 | 1.40E-09 | 454753 |
| Arm fat-free mass (right) | rs34776209 | 7 | 23513093 | T | C | -0.0148439 | 0.00143388 | 0.247485 | 4.10E-25 | 454753 |
| Arm fat-free mass (right) | rs3778934 | 7 | 39445385 | C | A | -0.00792233 | 0.00130341 | 0.340611 | 1.20E-09 | 454753 |
| Arm fat-free mass (right) | rs74876583 | 7 | 50602539 | G | T | 0.0163624 | 0.00192329 | 0.117157 | 1.80E-17 | 454753 |
| Arm fat-free mass (right) | rs10260993 | 7 | 55884295 | G | T | -0.00850911 | 0.00155878 | 0.195958 | 4.80E-08 | 454753 |
| Arm fat-free mass (right) | rs4285416 | 7 | 92471899 | A | G | 0.00972628 | 0.00165811 | 0.166079 | 4.50E-09 | 454753 |
| Arm fat-free mass (right) | rs58687622 | 7 | 6494765 | A | G | 0.0112225 | 0.00180101 | 0.140832 | 4.60E-10 | 454753 |
| Arm fat-free mass (right) | rs7805694 | 7 | 20437005 | T | C | 0.00710098 | 0.00125638 | 0.584617 | 1.60E-08 | 454753 |
| Arm fat-free mass (right) | rs723149 | 7 | 46577056 | G | A | -0.0102844 | 0.00124607 | 0.562878 | 1.50E-16 | 454753 |
| Arm fat-free mass (right) | rs10269774 | 7 | 92253972 | A | G | 0.0228883 | 0.00131732 | 0.326419 | 1.30E-67 | 454753 |
| Arm fat-free mass (right) | rs1701827 | 7 | 113040467 | G | A | -0.00785695 | 0.00140101 | 0.270388 | 2.00E-08 | 454753 |
| Arm fat-free mass (right) | rs1403987 | 7 | 38111941 | G | A | 0.0082689 | 0.0012968 | 0.653552 | 1.80E-10 | 454753 |
| Arm fat-free mass (right) | rs13240065 | 7 | 73015369 | A | G | 0.0196074 | 0.00184388 | 0.128419 | 2.10E-26 | 454753 |
| Arm fat-free mass (right) | rs236628 | 7 | 75023850 | T | G | 0.00937754 | 0.00149585 | 0.235708 | 3.60E-10 | 454753 |
| Arm fat-free mass (right) | rs11525873 | 7 | 138817193 | C | T | -0.0138166 | 0.00208434 | 0.097691 | 3.40E-11 | 454753 |
| Arm fat-free mass (right) | rs115946508 | 7 | 150497496 | A | C | -0.0122235 | 0.00197495 | 0.111478 | 6.00E-10 | 454753 |
| Arm fat-free mass (right) | rs4725984 | 7 | 150668514 | C | T | 0.0175188 | 0.0012954 | 0.642037 | 1.10E-41 | 454753 |
| Arm fat-free mass (right) | rs6951209 | 7 | 1273821 | T | A | -0.0105106 | 0.0015466 | 0.200161 | 1.10E-11 | 454753 |
| Arm fat-free mass (right) | rs10242866 | 7 | 17920613 | T | C | 0.00801202 | 0.00126193 | 0.398766 | 2.20E-10 | 454753 |
| Arm fat-free mass (right) | rs508347 | 7 | 28212824 | C | T | -0.0113417 | 0.00135186 | 0.703154 | 4.90E-17 | 454753 |
| Arm fat-free mass (right) | rs7788672 | 7 | 93139177 | C | G | 0.010734 | 0.00123784 | 0.476284 | 4.30E-18 | 454753 |
| Arm fat-free mass (right) | rs10243988 | 7 | 99528761 | A | G | -0.00869941 | 0.00156134 | 0.194778 | 2.50E-08 | 454753 |
| Arm fat-free mass (right) | rs39328 | 7 | 103444978 | T | C | 0.00933598 | 0.00125156 | 0.424794 | 8.70E-14 | 454753 |
| Arm fat-free mass (right) | rs10248298 | 7 | 121963813 | A | C | 0.00980521 | 0.00128049 | 0.365939 | 1.90E-14 | 454753 |
| Arm fat-free mass (right) | rs62621812 | 7 | 127015083 | A | G | 0.0395156 | 0.00450698 | 0.020303 | 1.80E-18 | 454753 |
| Arm fat-free mass (right) | rs1182207 | 7 | 2810746 | A | G | -0.0177332 | 0.00135744 | 0.292976 | 5.30E-39 | 454753 |
| Arm fat-free mass (right) | rs10950207 | 7 | 70105168 | T | C | 0.00752295 | 0.00127178 | 0.384496 | 3.30E-09 | 454753 |
| Arm fat-free mass (right) | rs822551 | 7 | 148650375 | G | A | 0.0111437 | 0.00159657 | 0.812218 | 3.00E-12 | 454753 |
| Arm fat-free mass (right) | rs17828687 | 8 | 73454767 | A | C | -0.00964607 | 0.00125369 | 0.57324 | 1.40E-14 | 454753 |
| Arm fat-free mass (right) | rs11997525 | 8 | 49401982 | A | T | 0.0147608 | 0.00165696 | 0.167032 | 5.20E-19 | 454753 |
| Arm fat-free mass (right) | rs62515438 | 8 | 57161608 | G | T | 0.0180265 | 0.00147341 | 0.227657 | 2.00E-34 | 454753 |
| Arm fat-free mass (right) | rs61729527 | 8 | 77761919 | T | C | -0.0201365 | 0.00278814 | 0.051873 | 5.10E-13 | 454753 |
| Arm fat-free mass (right) | rs7842996 | 8 | 78107140 | A | T | 0.0167611 | 0.00137346 | 0.284233 | 3.00E-34 | 454753 |
| Arm fat-free mass (right) | rs55674305 | 8 | 89435868 | A | G | -0.00963826 | 0.00134436 | 0.306138 | 7.50E-13 | 454753 |
| Arm fat-free mass (right) | rs3925 | 8 | 38281658 | A | G | -0.00878492 | 0.00143887 | 0.244855 | 1.00E-09 | 454753 |
| Arm fat-free mass (right) | rs72656010 | 8 | 57122215 | C | T | -0.0320887 | 0.00183053 | 0.132269 | 8.50E-69 | 454753 |
| Arm fat-free mass (right) | rs11778491 | 8 | 120451362 | C | G | -0.0114489 | 0.00142261 | 0.251869 | 8.40E-16 | 454753 |
| Arm fat-free mass (right) | rs35309034 | 8 | 126498265 | A | C | -0.0116069 | 0.00147126 | 0.237893 | 3.00E-15 | 454753 |
| Arm fat-free mass (right) | rs12679359 | 8 | 130724556 | T | G | -0.0130836 | 0.00179789 | 0.136913 | 3.40E-13 | 454753 |
| Arm fat-free mass (right) | rs1057626 | 8 | 10962800 | C | T | -0.00926063 | 0.00124018 | 0.520286 | 8.20E-14 | 454753 |
| Arm fat-free mass (right) | rs2721938 | 8 | 116635611 | T | C | -0.0113402 | 0.00126387 | 0.600482 | 2.90E-19 | 454753 |
| Arm fat-free mass (right) | rs10283100 | 8 | 120596023 | G | A | 0.0249639 | 0.00270075 | 0.944505 | 2.40E-20 | 454753 |
| Arm fat-free mass (right) | rs10107388 | 8 | 145004944 | C | T | -0.0120781 | 0.00128644 | 0.36926 | 6.10E-21 | 454753 |
| Arm fat-free mass (right) | rs12545613 | 8 | 6325499 | T | C | 0.0108066 | 0.00181166 | 0.134858 | 2.40E-09 | 454753 |
| Arm fat-free mass (right) | rs7824070 | 8 | 23136793 | T | C | 0.00879037 | 0.00132284 | 0.672916 | 3.00E-11 | 454753 |
| Arm fat-free mass (right) | rs17089329 | 8 | 23390046 | G | C | 0.0112593 | 0.00155134 | 0.20267 | 3.90E-13 | 454753 |
| Arm fat-free mass (right) | rs55796651 | 8 | 25349240 | T | C | -0.00854793 | 0.00141509 | 0.257413 | 1.50E-09 | 454753 |
| Arm fat-free mass (right) | rs13264909 | 8 | 64702385 | T | A | -0.00718729 | 0.00125068 | 0.428925 | 9.10E-09 | 454753 |
| Arm fat-free mass (right) | rs4909912 | 8 | 135572297 | T | C | -0.0178778 | 0.0012521 | 0.426331 | 3.00E-46 | 454753 |
| Arm fat-free mass (right) | rs1412234 | 9 | 28410683 | C | T | 0.0100772 | 0.00132014 | 0.327318 | 2.30E-14 | 454753 |
| Arm fat-free mass (right) | rs10119967 | 9 | 99268421 | C | A | 0.0136742 | 0.00153644 | 0.204099 | 5.60E-19 | 454753 |
| Arm fat-free mass (right) | rs4073153 | 9 | 139259349 | G | A | 0.00729373 | 0.00125397 | 0.438865 | 6.00E-09 | 454753 |
| Arm fat-free mass (right) | rs2295794 | 9 | 35700150 | T | C | -0.00757835 | 0.00125851 | 0.405648 | 1.70E-09 | 454753 |
| Arm fat-free mass (right) | rs734764 | 9 | 90852624 | C | G | -0.00903898 | 0.0015195 | 0.789343 | 2.70E-09 | 454753 |
| Arm fat-free mass (right) | rs663344 | 9 | 98316331 | C | G | -0.0132538 | 0.00163122 | 0.181315 | 4.50E-16 | 454753 |
| Arm fat-free mass (right) | rs7033487 | 9 | 119129257 | C | T | -0.0209759 | 0.00155306 | 0.197509 | 1.40E-41 | 454753 |
| Arm fat-free mass (right) | rs13283416 | 9 | 119301607 | G | T | 0.0104484 | 0.0012545 | 0.427325 | 8.20E-17 | 454753 |
| Arm fat-free mass (right) | rs10986292 | 9 | 127016876 | G | T | 0.0105012 | 0.00130717 | 0.339077 | 9.50E-16 | 454753 |
| Arm fat-free mass (right) | rs10820852 | 9 | 94186973 | A | C | -0.0113982 | 0.00138393 | 0.276307 | 1.80E-16 | 454753 |
| Arm fat-free mass (right) | rs5015933 | 9 | 128137418 | C | T | -0.00884901 | 0.00124202 | 0.45598 | 1.00E-12 | 454753 |
| Arm fat-free mass (right) | rs1927635 | 9 | 16461905 | C | T | 0.00917689 | 0.00130704 | 0.354175 | 2.20E-12 | 454753 |
| Arm fat-free mass (right) | rs10811668 | 9 | 22164991 | A | C | -0.00840809 | 0.00154037 | 0.206624 | 4.80E-08 | 454753 |
| Arm fat-free mass (right) | rs11142700 | 9 | 73757155 | C | T | -0.00814745 | 0.00126021 | 0.408318 | 1.00E-10 | 454753 |
| Arm fat-free mass (right) | rs28620532 | 9 | 98216876 | G | A | 0.0159103 | 0.0013018 | 0.349029 | 2.40E-34 | 454753 |
| Arm fat-free mass (right) | rs11794152 | 9 | 23345347 | G | A | 0.00863952 | 0.00125632 | 0.415095 | 6.10E-12 | 454753 |
| Arm fat-free mass (right) | rs773145 | 9 | 77668969 | C | G | -0.00773083 | 0.00125494 | 0.415622 | 7.30E-10 | 454753 |
| Arm fat-free mass (right) | rs7023690 | 9 | 102623328 | A | C | -0.00759774 | 0.00124795 | 0.5552 | 1.10E-09 | 454753 |
| Arm fat-free mass (right) | rs12344515 | 9 | 113801231 | T | C | -0.00911615 | 0.00144996 | 0.240334 | 3.20E-10 | 454753 |
| Arm fat-free mass (right) | rs10453255 | 9 | 137264712 | G | A | -0.00956372 | 0.00148932 | 0.221621 | 1.30E-10 | 454753 |
| Arm fat-free mass (right) | rs11592463 | 10 | 34518442 | A | G | -0.00937894 | 0.00156137 | 0.195 | 1.90E-09 | 454753 |
| Arm fat-free mass (right) | rs117543413 | 10 | 79543740 | T | C | -0.0332548 | 0.00475621 | 0.017521 | 2.70E-12 | 454753 |
| Arm fat-free mass (right) | rs332115 | 10 | 28926054 | A | G | -0.00813308 | 0.00138334 | 0.280063 | 4.10E-09 | 454753 |
| Arm fat-free mass (right) | rs1316312 | 10 | 81110417 | C | G | -0.00978544 | 0.00123551 | 0.500243 | 2.40E-15 | 454753 |
| Arm fat-free mass (right) | rs7910211 | 10 | 81228378 | C | T | 0.00990443 | 0.00169333 | 0.158889 | 4.90E-09 | 454753 |
| Arm fat-free mass (right) | rs73601548 | 10 | 18549889 | T | C | 0.0138127 | 0.00194806 | 0.114546 | 1.30E-12 | 454753 |
| Arm fat-free mass (right) | rs1890951 | 10 | 62054706 | G | A | 0.00714452 | 0.0012792 | 0.619676 | 2.30E-08 | 454753 |
| Arm fat-free mass (right) | rs2902406 | 10 | 102660281 | C | G | 0.0149866 | 0.00124937 | 0.431538 | 3.80E-33 | 454753 |
| Arm fat-free mass (right) | rs2265309 | 10 | 104487871 | C | T | -0.012118 | 0.00123758 | 0.516963 | 1.20E-22 | 454753 |
| Arm fat-free mass (right) | rs11593630 | 10 | 120491506 | T | C | -0.00812554 | 0.0012917 | 0.352989 | 3.20E-10 | 454753 |
| Arm fat-free mass (right) | rs11245450 | 10 | 126658075 | A | G | -0.0101534 | 0.00126373 | 0.421949 | 9.40E-16 | 454753 |
| Arm fat-free mass (right) | rs75044513 | 10 | 121139812 | C | T | 0.0124674 | 0.00206014 | 0.10011 | 1.40E-09 | 454753 |
| Arm fat-free mass (right) | rs75406471 | 10 | 5257647 | A | G | 0.0135614 | 0.00171234 | 0.154271 | 2.40E-15 | 454753 |
| Arm fat-free mass (right) | rs10740991 | 10 | 22058137 | C | G | -0.0102416 | 0.00137415 | 0.717739 | 9.10E-14 | 454753 |
| Arm fat-free mass (right) | rs11014285 | 10 | 25178864 | A | G | 0.0173857 | 0.00168465 | 0.165274 | 5.70E-25 | 454753 |
| Arm fat-free mass (right) | rs61849823 | 10 | 53290991 | C | T | 0.0110245 | 0.00168192 | 0.164173 | 5.60E-11 | 454753 |
| Arm fat-free mass (right) | rs3740591 | 10 | 70287303 | T | C | 0.0109674 | 0.00125604 | 0.44535 | 2.50E-18 | 454753 |
| Arm fat-free mass (right) | rs4255484 | 10 | 77215583 | G | C | -0.0116766 | 0.00124727 | 0.558666 | 7.80E-21 | 454753 |
| Arm fat-free mass (right) | rs146498112 | 10 | 98657257 | G | C | -0.033911 | 0.0053479 | 0.014168 | 2.30E-10 | 454753 |
| Arm fat-free mass (right) | rs3862012 | 10 | 114682553 | G | A | -0.00713056 | 0.0012457 | 0.515618 | 1.00E-08 | 454753 |
| Arm fat-free mass (right) | rs4752689 | 10 | 124131176 | A | G | 0.0106832 | 0.00125335 | 0.584209 | 1.50E-17 | 454753 |
| Arm fat-free mass (right) | rs77603146 | 11 | 126200090 | A | G | 0.0108937 | 0.00197928 | 0.110679 | 3.70E-08 | 454753 |
| Arm fat-free mass (right) | rs10832961 | 11 | 18653957 | G | C | -0.00888856 | 0.00144505 | 0.758101 | 7.70E-10 | 454753 |
| Arm fat-free mass (right) | rs78287937 | 11 | 64773101 | G | T | 0.0133569 | 0.00216113 | 0.089982 | 6.40E-10 | 454753 |
| Arm fat-free mass (right) | rs2450128 | 11 | 77940075 | A | G | -0.0105747 | 0.00172253 | 0.151947 | 8.30E-10 | 454753 |
| Arm fat-free mass (right) | rs11217843 | 11 | 120239937 | G | A | -0.010818 | 0.00167438 | 0.162671 | 1.00E-10 | 454753 |
| Arm fat-free mass (right) | rs11042725 | 11 | 10325325 | A | C | -0.0106569 | 0.00123483 | 0.488464 | 6.10E-18 | 454753 |
| Arm fat-free mass (right) | rs4922819 | 11 | 29349419 | G | A | 0.00889152 | 0.00135035 | 0.303739 | 4.60E-11 | 454753 |
| Arm fat-free mass (right) | rs35251247 | 11 | 43878459 | A | G | 0.0107246 | 0.0013683 | 0.291966 | 4.60E-15 | 454753 |
| Arm fat-free mass (right) | rs7952436 | 11 | 67024534 | T | C | -0.0321679 | 0.00225288 | 0.082025 | 3.00E-46 | 454753 |
| Arm fat-free mass (right) | rs1813212 | 11 | 89301382 | G | A | -0.00704061 | 0.00124578 | 0.445642 | 1.60E-08 | 454753 |
| Arm fat-free mass (right) | rs35506085 | 11 | 2165576 | A | G | -0.0179838 | 0.00160402 | 0.185105 | 3.60E-29 | 454753 |
| Arm fat-free mass (right) | rs6265 | 11 | 27679916 | T | C | -0.019877 | 0.00158011 | 0.188488 | 2.70E-36 | 454753 |
| Arm fat-free mass (right) | rs1228024 | 11 | 47951353 | A | C | -0.00942123 | 0.00130628 | 0.66071 | 5.50E-13 | 454753 |
| Arm fat-free mass (right) | rs667515 | 11 | 69449076 | C | G | -0.00840841 | 0.00127405 | 0.386068 | 4.10E-11 | 454753 |
| Arm fat-free mass (right) | rs676105 | 11 | 30443688 | C | T | 0.0119785 | 0.0013471 | 0.303592 | 6.00E-19 | 454753 |
| Arm fat-free mass (right) | rs7129320 | 11 | 68388220 | A | G | -0.0206878 | 0.00166068 | 0.165933 | 1.30E-35 | 454753 |
| Arm fat-free mass (right) | rs7949333 | 11 | 69916746 | T | C | -0.00810279 | 0.00124346 | 0.458339 | 7.20E-11 | 454753 |
| Arm fat-free mass (right) | rs11049684 | 12 | 28665359 | T | C | -0.0102153 | 0.00134837 | 0.298825 | 3.60E-14 | 454753 |
| Arm fat-free mass (right) | rs3730071 | 12 | 49168798 | A | C | -0.0201514 | 0.00360541 | 0.030238 | 2.30E-08 | 454753 |
| Arm fat-free mass (right) | rs12831185 | 12 | 53860781 | G | A | -0.0116246 | 0.0016451 | 0.170417 | 1.60E-12 | 454753 |
| Arm fat-free mass (right) | rs1949549 | 12 | 90170056 | C | T | 0.00802807 | 0.00137581 | 0.721576 | 5.40E-09 | 454753 |
| Arm fat-free mass (right) | rs9634212 | 12 | 93993266 | A | C | 0.0221662 | 0.00149457 | 0.220677 | 9.20E-50 | 454753 |
| Arm fat-free mass (right) | rs34118426 | 12 | 94201279 | G | A | -0.0111259 | 0.00134255 | 0.30443 | 1.20E-16 | 454753 |
| Arm fat-free mass (right) | rs9739533 | 12 | 122475916 | A | G | -0.0124826 | 0.00187942 | 0.876064 | 3.10E-11 | 454753 |
| Arm fat-free mass (right) | rs55726687 | 12 | 991306 | A | G | 0.0145656 | 0.00151458 | 0.20974 | 6.80E-22 | 454753 |
| Arm fat-free mass (right) | rs117451679 | 12 | 17245591 | G | A | 0.0118761 | 0.00203595 | 0.106093 | 5.40E-09 | 454753 |
| Arm fat-free mass (right) | rs7134283 | 12 | 24071748 | A | G | -0.011444 | 0.0013742 | 0.283403 | 8.20E-17 | 454753 |
| Arm fat-free mass (right) | rs10843397 | 12 | 29529523 | T | C | 0.00812663 | 0.00143975 | 0.241792 | 1.70E-08 | 454753 |
| Arm fat-free mass (right) | rs1351394 | 12 | 66351826 | C | T | -0.022423 | 0.00123438 | 0.511898 | 9.70E-74 | 454753 |
| Arm fat-free mass (right) | rs10878984 | 12 | 69828534 | T | C | 0.0100109 | 0.0013045 | 0.344784 | 1.70E-14 | 454753 |
| Arm fat-free mass (right) | rs2291256 | 12 | 133393323 | T | C | 0.015336 | 0.0021836 | 0.087652 | 2.20E-12 | 454753 |
| Arm fat-free mass (right) | rs2733287 | 12 | 41880909 | C | A | 0.00786902 | 0.0012357 | 0.488685 | 1.90E-10 | 454753 |
| Arm fat-free mass (right) | rs3782232 | 12 | 57116249 | A | G | -0.0180692 | 0.00240378 | 0.071347 | 5.60E-14 | 454753 |
| Arm fat-free mass (right) | rs58035271 | 12 | 66127644 | C | G | -0.0104826 | 0.00144099 | 0.242938 | 3.50E-13 | 454753 |
| Arm fat-free mass (right) | rs310796 | 12 | 77453226 | T | G | 0.0101605 | 0.00132856 | 0.680923 | 2.00E-14 | 454753 |
| Arm fat-free mass (right) | rs11065979 | 12 | 112059557 | T | C | -0.013931 | 0.0012452 | 0.438473 | 4.70E-29 | 454753 |
| Arm fat-free mass (right) | rs696343 | 12 | 116304907 | G | A | -0.0107938 | 0.00193548 | 0.115568 | 2.40E-08 | 454753 |
| Arm fat-free mass (right) | rs1271309 | 12 | 124820705 | G | A | -0.0175762 | 0.00167882 | 0.837866 | 1.20E-25 | 454753 |
| Arm fat-free mass (right) | rs35756741 | 12 | 12868701 | T | C | -0.013133 | 0.00214388 | 0.092388 | 9.00E-10 | 454753 |
| Arm fat-free mass (right) | rs7961994 | 12 | 46755112 | T | A | 0.0140665 | 0.00126448 | 0.609903 | 9.50E-29 | 454753 |
| Arm fat-free mass (right) | rs7132908 | 12 | 50263148 | A | G | 0.0146855 | 0.00126964 | 0.384446 | 6.10E-31 | 454753 |
| Arm fat-free mass (right) | rs73180805 | 12 | 103036662 | G | A | -0.0110626 | 0.00170227 | 0.15729 | 8.10E-11 | 454753 |
| Arm fat-free mass (right) | rs10861678 | 12 | 107319661 | A | G | -0.00991194 | 0.00139805 | 0.26573 | 1.30E-12 | 454753 |
| Arm fat-free mass (right) | rs11065015 | 12 | 120520863 | T | C | -0.0246744 | 0.00386771 | 0.02721 | 1.80E-10 | 454753 |
| Arm fat-free mass (right) | rs1473553 | 12 | 122985057 | T | G | 0.0155242 | 0.00141636 | 0.745115 | 5.90E-28 | 454753 |
| Arm fat-free mass (right) | rs11833839 | 12 | 132560957 | T | C | 0.0159506 | 0.00266998 | 0.056921 | 2.30E-09 | 454753 |
| Arm fat-free mass (right) | rs67551338 | 12 | 3393100 | T | C | 0.0207224 | 0.00259978 | 0.061474 | 1.60E-15 | 454753 |
| Arm fat-free mass (right) | rs76895963 | 12 | 4384844 | G | T | 0.085874 | 0.00478454 | 0.020663 | 5.00E-72 | 454753 |
| Arm fat-free mass (right) | rs2900208 | 12 | 11878464 | A | C | 0.0142024 | 0.00129272 | 0.353563 | 4.40E-28 | 454753 |
| Arm fat-free mass (right) | rs774214 | 12 | 56918566 | C | T | -0.00772327 | 0.00130587 | 0.663179 | 3.30E-09 | 454753 |
| Arm fat-free mass (right) | rs7305516 | 12 | 102382052 | G | A | -0.0106662 | 0.00124296 | 0.493656 | 9.40E-18 | 454753 |
| Arm fat-free mass (right) | rs11618507 | 13 | 30172751 | T | G | 0.0102245 | 0.00148278 | 0.225977 | 5.40E-12 | 454753 |
| Arm fat-free mass (right) | rs7321045 | 13 | 97034410 | A | G | 0.00877279 | 0.00125323 | 0.448791 | 2.60E-12 | 454753 |
| Arm fat-free mass (right) | rs1889775 | 13 | 110595596 | G | T | 0.0127966 | 0.00228713 | 0.080799 | 2.20E-08 | 454753 |
| Arm fat-free mass (right) | rs77079139 | 13 | 40769698 | A | G | 0.010597 | 0.00185618 | 0.128599 | 1.10E-08 | 454753 |
| Arm fat-free mass (right) | rs146851424 | 13 | 50377910 | C | A | 0.0512885 | 0.00429099 | 0.021629 | 6.30E-33 | 454753 |
| Arm fat-free mass (right) | rs1576981 | 13 | 65930367 | A | G | -0.00679747 | 0.00124118 | 0.4553 | 4.30E-08 | 454753 |
| Arm fat-free mass (right) | rs1924936 | 13 | 78443297 | A | T | 0.0129019 | 0.00148124 | 0.774407 | 3.00E-18 | 454753 |
| Arm fat-free mass (right) | rs1176315 | 13 | 81221665 | C | T | -0.00764399 | 0.00125094 | 0.550387 | 9.90E-10 | 454753 |
| Arm fat-free mass (right) | rs11616283 | 13 | 21493853 | C | T | 0.0107377 | 0.00181225 | 0.13989 | 3.10E-09 | 454753 |
| Arm fat-free mass (right) | rs2225226 | 13 | 51127270 | T | C | -0.0252446 | 0.00150752 | 0.215994 | 6.10E-63 | 454753 |
| Arm fat-free mass (right) | rs9540493 | 13 | 66205704 | G | A | -0.00733772 | 0.00124956 | 0.545154 | 4.30E-09 | 454753 |
| Arm fat-free mass (right) | rs9513510 | 13 | 99571922 | C | G | -0.00968481 | 0.00134885 | 0.698904 | 7.00E-13 | 454753 |
| Arm fat-free mass (right) | rs1967772 | 13 | 28036062 | A | G | -0.00968621 | 0.00137846 | 0.285207 | 2.10E-12 | 454753 |
| Arm fat-free mass (right) | rs67141907 | 13 | 42805360 | T | C | 0.0114952 | 0.00174325 | 0.149187 | 4.30E-11 | 454753 |
| Arm fat-free mass (right) | rs9596810 | 13 | 54056553 | T | C | -0.00880581 | 0.00128673 | 0.43473 | 7.70E-12 | 454753 |
| Arm fat-free mass (right) | rs9317002 | 13 | 59175727 | A | C | 0.010312 | 0.00124713 | 0.514575 | 1.40E-16 | 454753 |
| Arm fat-free mass (right) | rs10870597 | 13 | 114999636 | G | A | -0.00952398 | 0.00145908 | 0.235371 | 6.70E-11 | 454753 |
| Arm fat-free mass (right) | rs875908 | 14 | 23907608 | G | C | 0.00795391 | 0.00128953 | 0.641801 | 6.90E-10 | 454753 |
| Arm fat-free mass (right) | rs3212260 | 14 | 24804088 | T | A | 0.0114968 | 0.00141593 | 0.257918 | 4.70E-16 | 454753 |
| Arm fat-free mass (right) | rs1652946 | 14 | 34655995 | T | A | 0.00759339 | 0.00124213 | 0.512093 | 9.80E-10 | 454753 |
| Arm fat-free mass (right) | rs12879453 | 14 | 47309879 | G | A | -0.00843384 | 0.00124041 | 0.508895 | 1.10E-11 | 454753 |
| Arm fat-free mass (right) | rs7141420 | 14 | 79899454 | T | C | 0.0119543 | 0.00124641 | 0.516495 | 8.70E-22 | 454753 |
| Arm fat-free mass (right) | rs12879423 | 14 | 25927832 | G | A | 0.0145705 | 0.00133272 | 0.678686 | 8.00E-28 | 454753 |
| Arm fat-free mass (right) | rs12881869 | 14 | 50923249 | T | C | -0.0171735 | 0.00241785 | 0.070528 | 1.20E-12 | 454753 |
| Arm fat-free mass (right) | rs4899012 | 14 | 61003889 | C | G | -0.0188823 | 0.0012669 | 0.607273 | 3.10E-50 | 454753 |
| Arm fat-free mass (right) | rs61992671 | 14 | 101531854 | G | A | -0.0103372 | 0.00129354 | 0.492051 | 1.30E-15 | 454753 |
| Arm fat-free mass (right) | rs56130943 | 14 | 105906522 | C | A | 0.00983875 | 0.00150291 | 0.233146 | 5.90E-11 | 454753 |
| Arm fat-free mass (right) | rs10141392 | 14 | 35672013 | T | A | -0.0134245 | 0.00209349 | 0.097534 | 1.40E-10 | 454753 |
| Arm fat-free mass (right) | rs7150606 | 14 | 68413076 | T | G | -0.00973342 | 0.00177443 | 0.142105 | 4.10E-08 | 454753 |
| Arm fat-free mass (right) | rs11160601 | 14 | 101186641 | T | C | 0.016329 | 0.00215399 | 0.092371 | 3.40E-14 | 454753 |
| Arm fat-free mass (right) | rs2332175 | 14 | 70345411 | A | G | -0.00733422 | 0.00125256 | 0.546994 | 4.80E-09 | 454753 |
| Arm fat-free mass (right) | rs6575340 | 14 | 94023972 | A | G | 0.00849077 | 0.00128882 | 0.636029 | 4.50E-11 | 454753 |
| Arm fat-free mass (right) | rs4906203 | 14 | 102928991 | T | C | -0.00798402 | 0.00146154 | 0.233797 | 4.70E-08 | 454753 |
| Arm fat-free mass (right) | rs1135641 | 14 | 23299135 | T | G | -0.00734069 | 0.00124088 | 0.530804 | 3.30E-09 | 454753 |
| Arm fat-free mass (right) | rs2296316 | 14 | 65520246 | C | T | -0.0095928 | 0.00124995 | 0.464519 | 1.70E-14 | 454753 |
| Arm fat-free mass (right) | rs112560164 | 14 | 93112924 | A | G | 0.0105739 | 0.00157823 | 0.190616 | 2.10E-11 | 454753 |
| Arm fat-free mass (right) | rs4145824 | 14 | 103271600 | A | G | -0.00805973 | 0.00129755 | 0.652709 | 5.20E-10 | 454753 |
| Arm fat-free mass (right) | rs3809570 | 15 | 67000117 | A | C | 0.0137546 | 0.00144598 | 0.243312 | 1.90E-21 | 454753 |
| Arm fat-free mass (right) | rs16942324 | 15 | 89383854 | A | C | -0.0353849 | 0.00381076 | 0.027073 | 1.60E-20 | 454753 |
| Arm fat-free mass (right) | rs11071182 | 15 | 55644676 | G | A | 0.0114768 | 0.00185032 | 0.870441 | 5.60E-10 | 454753 |
| Arm fat-free mass (right) | rs933807 | 15 | 62274940 | C | G | -0.0104474 | 0.00124263 | 0.452536 | 4.20E-17 | 454753 |
| Arm fat-free mass (right) | rs380803 | 15 | 68161273 | C | T | 0.00934471 | 0.0013838 | 0.722718 | 1.40E-11 | 454753 |
| Arm fat-free mass (right) | rs1521624 | 15 | 79412399 | A | C | -0.00847026 | 0.00124642 | 0.470505 | 1.10E-11 | 454753 |
| Arm fat-free mass (right) | rs1573891 | 15 | 99186488 | C | G | -0.0197467 | 0.00170462 | 0.158473 | 5.00E-31 | 454753 |
| Arm fat-free mass (right) | rs12906197 | 15 | 38492199 | T | C | -0.0103843 | 0.00126103 | 0.421609 | 1.80E-16 | 454753 |
| Arm fat-free mass (right) | rs74841302 | 15 | 42084329 | A | G | -0.0374453 | 0.00477078 | 0.017079 | 4.20E-15 | 454753 |
| Arm fat-free mass (right) | rs35874463 | 15 | 67457698 | G | A | 0.0154306 | 0.00265194 | 0.057663 | 5.90E-09 | 454753 |
| Arm fat-free mass (right) | rs8043280 | 15 | 93425874 | G | C | -0.00837971 | 0.00133031 | 0.67835 | 3.00E-10 | 454753 |
| Arm fat-free mass (right) | rs2663125 | 15 | 99563891 | C | T | -0.00785838 | 0.00133923 | 0.690654 | 4.40E-09 | 454753 |
| Arm fat-free mass (right) | rs12907384 | 15 | 86276000 | C | T | -0.0107149 | 0.00123924 | 0.531905 | 5.30E-18 | 454753 |
| Arm fat-free mass (right) | rs71385734 | 16 | 2160503 | G | T | -0.022493 | 0.00165643 | 0.169905 | 5.30E-42 | 454753 |
| Arm fat-free mass (right) | rs7192870 | 16 | 14397436 | C | T | -0.00815391 | 0.00125284 | 0.469101 | 7.60E-11 | 454753 |
| Arm fat-free mass (right) | rs72774845 | 16 | 15147954 | C | A | -0.0114755 | 0.00133897 | 0.307455 | 1.00E-17 | 454753 |
| Arm fat-free mass (right) | rs7204864 | 16 | 19942927 | T | C | -0.0158771 | 0.00176437 | 0.143422 | 2.30E-19 | 454753 |
| Arm fat-free mass (right) | rs3751866 | 16 | 84771304 | C | T | -0.00786289 | 0.00143626 | 0.247479 | 4.40E-08 | 454753 |
| Arm fat-free mass (right) | rs8059189 | 16 | 86417349 | A | G | -0.0104299 | 0.00129318 | 0.40386 | 7.30E-16 | 454753 |
| Arm fat-free mass (right) | rs27345 | 16 | 2267877 | A | G | 0.0160308 | 0.00137115 | 0.284083 | 1.40E-31 | 454753 |
| Arm fat-free mass (right) | rs117342986 | 16 | 54267868 | T | C | 0.0223847 | 0.00404225 | 0.026446 | 3.10E-08 | 454753 |
| Arm fat-free mass (right) | rs34017457 | 16 | 67166731 | A | G | 0.0458469 | 0.00744006 | 0.00695 | 7.20E-10 | 454753 |
| Arm fat-free mass (right) | rs12443634 | 16 | 81524274 | C | A | -0.0086458 | 0.00137972 | 0.714274 | 3.70E-10 | 454753 |
| Arm fat-free mass (right) | rs10775348 | 16 | 88806348 | G | A | 0.0118074 | 0.00135768 | 0.703672 | 3.40E-18 | 454753 |
| Arm fat-free mass (right) | rs432925 | 16 | 334580 | C | G | -0.00758027 | 0.00138886 | 0.282719 | 4.80E-08 | 454753 |
| Arm fat-free mass (right) | rs7205337 | 16 | 780339 | G | A | 0.0124574 | 0.00152734 | 0.207526 | 3.50E-16 | 454753 |
| Arm fat-free mass (right) | rs4788218 | 16 | 30055750 | C | T | 0.0198605 | 0.0012618 | 0.400574 | 8.10E-56 | 454753 |
| Arm fat-free mass (right) | rs6500249 | 16 | 49778147 | G | A | -0.00881153 | 0.00140783 | 0.734692 | 3.90E-10 | 454753 |
| Arm fat-free mass (right) | rs2540034 | 16 | 4022694 | T | C | 0.0132352 | 0.00126834 | 0.568821 | 1.70E-25 | 454753 |
| Arm fat-free mass (right) | rs56094641 | 16 | 53806453 | G | A | 0.0341373 | 0.0012594 | 0.404646 | 8.39E-162 | 454753 |
| Arm fat-free mass (right) | rs2303083 | 16 | 24835168 | A | G | -0.0125672 | 0.00156489 | 0.19404 | 9.70E-16 | 454753 |
| Arm fat-free mass (right) | rs72801843 | 16 | 53508802 | A | T | 0.0131528 | 0.00134707 | 0.301412 | 1.60E-22 | 454753 |
| Arm fat-free mass (right) | rs34147411 | 16 | 68081246 | T | C | 0.0128086 | 0.00176722 | 0.14605 | 4.20E-13 | 454753 |
| Arm fat-free mass (right) | rs76513770 | 16 | 72505534 | C | T | -0.014959 | 0.00185036 | 0.128135 | 6.20E-16 | 454753 |
| Arm fat-free mass (right) | rs112898929 | 16 | 88298795 | A | T | -0.0131726 | 0.00232394 | 0.079584 | 1.40E-08 | 454753 |
| Arm fat-free mass (right) | rs55831773 | 17 | 7559037 | T | C | -0.0124332 | 0.00157908 | 0.199459 | 3.40E-15 | 454753 |
| Arm fat-free mass (right) | rs2075058 | 17 | 36906873 | G | A | 0.00813665 | 0.00123857 | 0.492081 | 5.10E-11 | 454753 |
| Arm fat-free mass (right) | rs76238604 | 17 | 42999702 | T | C | 0.0096672 | 0.00176801 | 0.144001 | 4.60E-08 | 454753 |
| Arm fat-free mass (right) | rs758598 | 17 | 59492714 | G | A | -0.0149723 | 0.00131401 | 0.668777 | 4.50E-30 | 454753 |
| Arm fat-free mass (right) | rs2005172 | 17 | 61996255 | C | A | 0.0202555 | 0.00130388 | 0.639786 | 2.00E-54 | 454753 |
| Arm fat-free mass (right) | rs1242507 | 17 | 17365399 | A | G | 0.00724815 | 0.00129223 | 0.560968 | 2.00E-08 | 454753 |
| Arm fat-free mass (right) | rs7223535 | 17 | 29211667 | A | G | -0.0223928 | 0.00139246 | 0.27037 | 3.40E-58 | 454753 |
| Arm fat-free mass (right) | rs9915532 | 17 | 47027359 | G | A | -0.0127625 | 0.00164926 | 0.830429 | 1.00E-14 | 454753 |
| Arm fat-free mass (right) | rs1401795 | 17 | 54839652 | G | A | -0.00731967 | 0.00124701 | 0.500805 | 4.40E-09 | 454753 |
| Arm fat-free mass (right) | rs236587 | 17 | 68203915 | C | T | -0.00807683 | 0.00141988 | 0.737218 | 1.30E-08 | 454753 |
| Arm fat-free mass (right) | rs78378222 | 17 | 7571752 | G | T | 0.0762651 | 0.00573729 | 0.012278 | 2.50E-40 | 454753 |
| Arm fat-free mass (right) | rs147107835 | 17 | 30246737 | T | C | -0.0546523 | 0.00985605 | 0.004059 | 2.90E-08 | 454753 |
| Arm fat-free mass (right) | rs35631456 | 17 | 61784471 | T | C | -0.0122892 | 0.00192962 | 0.117343 | 1.90E-10 | 454753 |
| Arm fat-free mass (right) | rs79680939 | 17 | 80523375 | A | G | 0.0169966 | 0.0029951 | 0.044937 | 1.40E-08 | 454753 |
| Arm fat-free mass (right) | rs11653850 | 17 | 7236124 | A | G | 0.0102003 | 0.00151652 | 0.214558 | 1.70E-11 | 454753 |
| Arm fat-free mass (right) | rs1044977 | 17 | 43227214 | C | T | -0.0131223 | 0.00142343 | 0.253688 | 3.00E-20 | 454753 |
| Arm fat-free mass (right) | rs173135 | 17 | 68172326 | T | C | -0.0159672 | 0.00195092 | 0.115084 | 2.70E-16 | 454753 |
| Arm fat-free mass (right) | rs77093479 | 17 | 79429575 | G | C | -0.0111273 | 0.00167959 | 0.165098 | 3.50E-11 | 454753 |
| Arm fat-free mass (right) | rs4968296 | 17 | 45078593 | T | C | 0.00839894 | 0.00142543 | 0.749091 | 3.80E-09 | 454753 |
| Arm fat-free mass (right) | rs114177791 | 17 | 78555512 | T | G | 0.00945623 | 0.00150976 | 0.214244 | 3.80E-10 | 454753 |
| Arm fat-free mass (right) | rs36000545 | 17 | 79093822 | G | A | -0.0150219 | 0.00128165 | 0.395728 | 1.00E-31 | 454753 |
| Arm fat-free mass (right) | rs57126421 | 18 | 2656989 | G | A | -0.00911022 | 0.00146358 | 0.237619 | 4.80E-10 | 454753 |
| Arm fat-free mass (right) | rs11663903 | 18 | 32762592 | A | G | 0.00698227 | 0.00125379 | 0.42903 | 2.60E-08 | 454753 |
| Arm fat-free mass (right) | rs8091287 | 18 | 45753742 | C | T | -0.00816133 | 0.00146572 | 0.231869 | 2.60E-08 | 454753 |
| Arm fat-free mass (right) | rs7229351 | 18 | 46516374 | A | G | -0.00925374 | 0.00128367 | 0.367652 | 5.60E-13 | 454753 |
| Arm fat-free mass (right) | rs11664336 | 18 | 46604851 | T | A | 0.0126827 | 0.00124956 | 0.434603 | 3.30E-24 | 454753 |
| Arm fat-free mass (right) | rs9951619 | 18 | 56882326 | G | T | 0.0105232 | 0.00147448 | 0.767276 | 9.50E-13 | 454753 |
| Arm fat-free mass (right) | rs6567160 | 18 | 57829135 | C | T | 0.0392715 | 0.0014648 | 0.232663 | 2.50E-158 | 454753 |
| Arm fat-free mass (right) | rs57636386 | 18 | 58048295 | C | T | -0.0197055 | 0.00224055 | 0.083836 | 1.40E-18 | 454753 |
| Arm fat-free mass (right) | rs1941697 | 18 | 31251276 | A | G | 0.00835713 | 0.00124376 | 0.449187 | 1.80E-11 | 454753 |
| Arm fat-free mass (right) | rs9960619 | 18 | 33040095 | T | C | 0.00810916 | 0.00130344 | 0.344325 | 4.90E-10 | 454753 |
| Arm fat-free mass (right) | rs59360013 | 18 | 74976835 | T | C | -0.0238877 | 0.00309784 | 0.0417 | 1.20E-14 | 454753 |
| Arm fat-free mass (right) | rs7237942 | 18 | 20728049 | G | A | 0.0248164 | 0.00151582 | 0.788849 | 3.10E-60 | 454753 |
| Arm fat-free mass (right) | rs12980774 | 19 | 3410135 | C | T | 0.00895524 | 0.00149444 | 0.221263 | 2.10E-09 | 454753 |
| Arm fat-free mass (right) | rs3843751 | 19 | 10748121 | T | C | -0.0122171 | 0.00131188 | 0.664259 | 1.20E-20 | 454753 |
| Arm fat-free mass (right) | rs62104476 | 19 | 30294716 | A | G | 0.0130161 | 0.00131773 | 0.330756 | 5.20E-23 | 454753 |
| Arm fat-free mass (right) | rs7245985 | 19 | 30710410 | G | T | -0.0116784 | 0.0015285 | 0.207552 | 2.20E-14 | 454753 |
| Arm fat-free mass (right) | rs285677 | 19 | 34286666 | C | T | 0.00989858 | 0.00132174 | 0.670626 | 6.90E-14 | 454753 |
| Arm fat-free mass (right) | rs3810291 | 19 | 47569003 | A | G | 0.0155684 | 0.00132054 | 0.67509 | 4.40E-32 | 454753 |
| Arm fat-free mass (right) | rs62136802 | 19 | 47459476 | T | A | 0.00795102 | 0.00133574 | 0.312904 | 2.60E-09 | 454753 |
| Arm fat-free mass (right) | rs281385 | 19 | 49217261 | G | A | -0.012753 | 0.00190097 | 0.879226 | 2.00E-11 | 454753 |
| Arm fat-free mass (right) | rs147110934 | 19 | 55993436 | T | G | -0.0288158 | 0.00401803 | 0.024293 | 7.40E-13 | 454753 |
| Arm fat-free mass (right) | rs11880992 | 19 | 2176403 | A | G | 0.0129881 | 0.00125994 | 0.40845 | 6.50E-25 | 454753 |
| Arm fat-free mass (right) | rs10404726 | 19 | 18834514 | T | C | -0.00720229 | 0.00124255 | 0.465529 | 6.80E-09 | 454753 |
| Arm fat-free mass (right) | rs10432304 | 19 | 4458242 | T | A | 0.00773513 | 0.0012658 | 0.560068 | 9.90E-10 | 454753 |
| Arm fat-free mass (right) | rs1864000 | 19 | 7110550 | G | T | -0.0140841 | 0.00183197 | 0.140114 | 1.50E-14 | 454753 |
| Arm fat-free mass (right) | rs62621197 | 19 | 8670147 | T | C | -0.0274442 | 0.00339702 | 0.037195 | 6.50E-16 | 454753 |
| Arm fat-free mass (right) | rs7245864 | 19 | 38305660 | T | C | -0.00689249 | 0.0012436 | 0.542487 | 3.00E-08 | 454753 |
| Arm fat-free mass (right) | rs10423120 | 19 | 17422036 | G | A | -0.0100896 | 0.00159925 | 0.18413 | 2.80E-10 | 454753 |
| Arm fat-free mass (right) | rs6136938 | 20 | 20058992 | A | G | -0.00916836 | 0.00124876 | 0.435933 | 2.10E-13 | 454753 |
| Arm fat-free mass (right) | rs34879158 | 20 | 32300634 | C | A | -0.0195044 | 0.00140724 | 0.262793 | 1.10E-43 | 454753 |
| Arm fat-free mass (right) | rs6512577 | 20 | 47865784 | T | C | 0.00878513 | 0.00149517 | 0.219935 | 4.20E-09 | 454753 |
| Arm fat-free mass (right) | rs4341996 | 20 | 54377866 | C | A | -0.0086036 | 0.00151567 | 0.213236 | 1.40E-08 | 454753 |
| Arm fat-free mass (right) | rs6142059 | 20 | 32544327 | C | T | 0.00929401 | 0.00124038 | 0.492487 | 6.70E-14 | 454753 |
| Arm fat-free mass (right) | rs143384 | 20 | 34025756 | G | A | 0.0306155 | 0.00125974 | 0.404433 | 1.80E-130 | 454753 |
| Arm fat-free mass (right) | rs55830103 | 20 | 57465943 | G | T | -0.0108712 | 0.00163778 | 0.174805 | 3.20E-11 | 454753 |
| Arm fat-free mass (right) | rs2650965 | 20 | 6709838 | G | A | -0.0085372 | 0.00132138 | 0.329601 | 1.00E-10 | 454753 |
| Arm fat-free mass (right) | rs16996657 | 20 | 15816236 | C | T | 0.0107373 | 0.00185838 | 0.127762 | 7.60E-09 | 454753 |
| Arm fat-free mass (right) | rs1411297 | 20 | 6488806 | C | A | -0.00982391 | 0.00130527 | 0.652748 | 5.20E-14 | 454753 |
| Arm fat-free mass (right) | rs1744769 | 20 | 35769592 | C | T | 0.0114536 | 0.00158195 | 0.810843 | 4.50E-13 | 454753 |
| Arm fat-free mass (right) | rs13037630 | 20 | 51143319 | T | C | -0.0181478 | 0.00160305 | 0.183009 | 1.00E-29 | 454753 |
| Arm fat-free mass (right) | rs2252720 | 20 | 21223663 | T | C | -0.0123115 | 0.0013304 | 0.674086 | 2.20E-20 | 454753 |
| Arm fat-free mass (right) | rs73619441 | 20 | 61564901 | G | T | -0.0123185 | 0.0017652 | 0.144215 | 3.00E-12 | 454753 |
| Arm fat-free mass (right) | rs2833354 | 21 | 32636072 | A | G | -0.0120851 | 0.00206188 | 0.100398 | 4.60E-09 | 454753 |
| Arm fat-free mass (right) | rs9976812 | 21 | 39690245 | G | C | -0.0114102 | 0.00125909 | 0.563675 | 1.30E-19 | 454753 |
| Arm fat-free mass (right) | rs9636630 | 21 | 37474029 | G | A | -0.00817607 | 0.00146608 | 0.232617 | 2.40E-08 | 454753 |
| Arm fat-free mass (right) | rs4253755 | 22 | 46615376 | A | G | 0.0106583 | 0.00186451 | 0.128464 | 1.10E-08 | 454753 |
| Arm fat-free mass (right) | rs165656 | 22 | 19948863 | C | G | 0.00790502 | 0.00124902 | 0.517386 | 2.50E-10 | 454753 |
| Arm fat-free mass (right) | rs41311445 | 22 | 42070374 | C | A | -0.0241117 | 0.00210864 | 0.095781 | 2.80E-30 | 454753 |
| Arm fat-free mass (right) | rs113619763 | 22 | 46399175 | T | A | 0.0165461 | 0.00256405 | 0.062477 | 1.10E-10 | 454753 |
| Arm fat-free mass (right) | rs5771118 | 22 | 50714289 | C | T | 0.00804198 | 0.00142417 | 0.741603 | 1.60E-08 | 454753 |
| Arm fat-free mass (right) | rs35665085 | 22 | 17625915 | A | G | -0.0158819 | 0.00269489 | 0.055968 | 3.80E-09 | 454753 |
| Arm fat-free mass (right) | rs5752989 | 22 | 30365780 | A | G | -0.00993198 | 0.00125258 | 0.571156 | 2.20E-15 | 454753 |
| Arm fat-free mass (right) | rs5753630 | 22 | 31861950 | G | A | 0.0069169 | 0.00125264 | 0.4395 | 3.40E-08 | 454753 |

**Table S2.G Summary of the SNPs (after clumping process) associated with fat mass of left leg (per SD increase)**

| **exposure** | **SNP** | **chromosome** | **position** | **effect_allele** | **other_allele** | **beta** | **se** | **eaf** | **pval** | **samplesize** |
| --- | --- | --- | --- | --- | --- | --- | --- | --- | --- | --- |
| Leg fat mass (left) | rs7537581 | 1 | 2725475 | A | C | 0.0113285 | 0.00159528 | 0.531725 | 1.20E-12 | 454823 |
| Leg fat mass (left) | rs10799778 | 1 | 23313353 | G | T | -0.0149969 | 0.00212248 | 0.833683 | 1.60E-12 | 454823 |
| Leg fat mass (left) | rs12140153 | 1 | 62579891 | T | G | -0.0263687 | 0.00277128 | 0.094284 | 1.80E-21 | 454823 |
| Leg fat mass (left) | rs11208779 | 1 | 66417145 | C | G | 0.0119776 | 0.00158634 | 0.528885 | 4.30E-14 | 454823 |
| Leg fat mass (left) | rs3845344 | 1 | 75001480 | T | C | 0.0103401 | 0.0016185 | 0.391166 | 1.70E-10 | 454823 |
| Leg fat mass (left) | rs1778830 | 1 | 156489974 | A | G | 0.0102945 | 0.00164761 | 0.362114 | 4.20E-10 | 454823 |
| Leg fat mass (left) | rs543874 | 1 | 177889480 | G | A | 0.0352051 | 0.00195592 | 0.205274 | 2.00E-72 | 454823 |
| Leg fat mass (left) | rs815163 | 1 | 190294726 | C | T | -0.0116587 | 0.00159148 | 0.563225 | 2.40E-13 | 454823 |
| Leg fat mass (left) | rs76702514 | 1 | 195148296 | G | C | -0.0120867 | 0.00194933 | 0.210647 | 5.60E-10 | 454823 |
| Leg fat mass (left) | rs72634826 | 1 | 1601052 | A | G | -0.0151175 | 0.00182703 | 0.259881 | 1.30E-16 | 454823 |
| Leg fat mass (left) | rs1167311 | 1 | 49996959 | A | G | -0.0154341 | 0.00170759 | 0.681325 | 1.60E-19 | 454823 |
| Leg fat mass (left) | rs2568958 | 1 | 72765116 | A | G | 0.0184213 | 0.00161247 | 0.60367 | 3.20E-30 | 454823 |
| Leg fat mass (left) | rs61813324 | 1 | 156049877 | T | C | 0.0187233 | 0.00234046 | 0.135705 | 1.20E-15 | 454823 |
| Leg fat mass (left) | rs79518326 | 1 | 174946883 | A | C | -0.0352035 | 0.00479266 | 0.028644 | 2.10E-13 | 454823 |
| Leg fat mass (left) | rs12034991 | 1 | 210145298 | G | A | 0.00991143 | 0.0016392 | 0.367763 | 1.50E-09 | 454823 |
| Leg fat mass (left) | rs2494196 | 1 | 219762581 | A | C | 0.0142735 | 0.00174806 | 0.286031 | 3.20E-16 | 454823 |
| Leg fat mass (left) | rs10915840 | 1 | 225668524 | A | G | -0.0109066 | 0.00178089 | 0.274234 | 9.10E-10 | 454823 |
| Leg fat mass (left) | rs12031634 | 1 | 34584393 | A | G | -0.0106711 | 0.00173707 | 0.29648 | 8.10E-10 | 454823 |
| Leg fat mass (left) | rs12144626 | 1 | 47670525 | C | T | -0.0119825 | 0.0016057 | 0.582796 | 8.50E-14 | 454823 |
| Leg fat mass (left) | rs34517439 | 1 | 78450517 | A | C | 0.0331884 | 0.00244533 | 0.121686 | 5.90E-42 | 454823 |
| Leg fat mass (left) | rs1730851 | 1 | 107596443 | G | A | -0.0111889 | 0.00167285 | 0.65674 | 2.30E-11 | 454823 |
| Leg fat mass (left) | rs16847271 | 1 | 174605170 | T | G | 0.015364 | 0.00251534 | 0.110694 | 1.00E-09 | 454823 |
| Leg fat mass (left) | rs2678204 | 1 | 201800511 | G | T | 0.0178408 | 0.00166792 | 0.340175 | 1.10E-26 | 454823 |
| Leg fat mass (left) | rs12042959 | 1 | 243533273 | G | A | -0.0135821 | 0.00226263 | 0.14393 | 1.90E-09 | 454823 |
| Leg fat mass (left) | rs10779795 | 1 | 6677064 | G | A | -0.0115608 | 0.00167296 | 0.337948 | 4.80E-12 | 454823 |
| Leg fat mass (left) | rs11165643 | 1 | 96924097 | T | C | 0.0158205 | 0.00160517 | 0.590151 | 6.50E-23 | 454823 |
| Leg fat mass (left) | rs17024393 | 1 | 110154688 | C | T | 0.0490131 | 0.00498906 | 0.025904 | 8.90E-23 | 454823 |
| Leg fat mass (left) | rs115584674 | 1 | 150346106 | G | A | -0.0204896 | 0.00335664 | 0.058665 | 1.00E-09 | 454823 |
| Leg fat mass (left) | rs383701 | 1 | 243842288 | A | G | -0.0135379 | 0.00234416 | 0.868881 | 7.70E-09 | 454823 |
| Leg fat mass (left) | rs3766823 | 1 | 32197257 | A | G | 0.0154504 | 0.00209427 | 0.172014 | 1.60E-13 | 454823 |
| Leg fat mass (left) | rs3737992 | 1 | 33234128 | A | G | -0.0164983 | 0.00210672 | 0.168988 | 4.80E-15 | 454823 |
| Leg fat mass (left) | rs6688826 | 1 | 80812329 | C | T | 0.0109961 | 0.00172452 | 0.298184 | 1.80E-10 | 454823 |
| Leg fat mass (left) | rs12072739 | 1 | 98315893 | G | A | 0.0133567 | 0.00189633 | 0.224588 | 1.90E-12 | 454823 |
| Leg fat mass (left) | rs6726271 | 2 | 36536198 | T | C | 0.0156111 | 0.002766 | 0.090188 | 1.70E-08 | 454823 |
| Leg fat mass (left) | rs396354 | 2 | 86850022 | C | T | -0.0111421 | 0.00175573 | 0.715646 | 2.20E-10 | 454823 |
| Leg fat mass (left) | rs2381404 | 2 | 144035442 | C | T | 0.0103564 | 0.00184305 | 0.243917 | 1.90E-08 | 454823 |
| Leg fat mass (left) | rs77149883 | 2 | 145879854 | A | G | 0.0198362 | 0.00342506 | 0.059907 | 7.00E-09 | 454823 |
| Leg fat mass (left) | rs34234296 | 2 | 175166636 | A | G | -0.0122586 | 0.00163515 | 0.392486 | 6.50E-14 | 454823 |
| Leg fat mass (left) | rs2216931 | 2 | 181599070 | A | C | 0.0143575 | 0.00167206 | 0.661952 | 9.00E-18 | 454823 |
| Leg fat mass (left) | rs13427822 | 2 | 213414265 | G | A | -0.0129855 | 0.00179665 | 0.271195 | 4.90E-13 | 454823 |
| Leg fat mass (left) | rs284532 | 2 | 217332057 | G | T | -0.009124 | 0.00158252 | 0.522901 | 8.10E-09 | 454823 |
| Leg fat mass (left) | rs2433733 | 2 | 230816703 | A | G | -0.0144719 | 0.00169067 | 0.677732 | 1.10E-17 | 454823 |
| Leg fat mass (left) | rs10187101 | 2 | 50742227 | T | C | -0.0118349 | 0.00164184 | 0.363617 | 5.70E-13 | 454823 |
| Leg fat mass (left) | rs4672338 | 2 | 60217457 | T | C | 0.00957272 | 0.00167278 | 0.336281 | 1.00E-08 | 454823 |
| Leg fat mass (left) | rs11691869 | 2 | 100805996 | A | C | -0.0160099 | 0.00164777 | 0.361917 | 2.60E-22 | 454823 |
| Leg fat mass (left) | rs264948 | 2 | 104301541 | T | C | -0.00972562 | 0.00158061 | 0.469185 | 7.60E-10 | 454823 |
| Leg fat mass (left) | rs12477385 | 2 | 166144850 | T | G | -0.0131492 | 0.00189505 | 0.225537 | 4.00E-12 | 454823 |
| Leg fat mass (left) | rs79847714 | 2 | 193865203 | C | T | -0.0132341 | 0.001884 | 0.228216 | 2.10E-12 | 454823 |
| Leg fat mass (left) | rs6744646 | 2 | 628504 | G | A | 0.0395089 | 0.00209352 | 0.828315 | 1.90E-79 | 454823 |
| Leg fat mass (left) | rs62124758 | 2 | 12847169 | T | C | 0.012527 | 0.00228408 | 0.143902 | 4.10E-08 | 454823 |
| Leg fat mass (left) | rs1861410 | 2 | 58933591 | T | C | -0.0155214 | 0.00159445 | 0.555368 | 2.10E-22 | 454823 |
| Leg fat mass (left) | rs2861685 | 2 | 67837553 | C | T | -0.0129223 | 0.00160126 | 0.412112 | 7.00E-16 | 454823 |
| Leg fat mass (left) | rs429343 | 2 | 147903382 | G | A | -0.0126335 | 0.00160102 | 0.576559 | 3.00E-15 | 454823 |
| Leg fat mass (left) | rs72866851 | 2 | 154842750 | T | A | 0.0155111 | 0.00260673 | 0.102234 | 2.70E-09 | 454823 |
| Leg fat mass (left) | rs13389219 | 2 | 165528876 | T | C | 0.0112334 | 0.00161587 | 0.392421 | 3.60E-12 | 454823 |
| Leg fat mass (left) | rs4625888 | 2 | 204101157 | T | C | 0.0100494 | 0.00158942 | 0.557749 | 2.60E-10 | 454823 |
| Leg fat mass (left) | rs1263629 | 2 | 207936911 | G | A | 0.0145718 | 0.00226362 | 0.143748 | 1.20E-10 | 454823 |
| Leg fat mass (left) | rs62107261 | 2 | 422144 | C | T | -0.0615238 | 0.00369417 | 0.048321 | 2.80E-62 | 454823 |
| Leg fat mass (left) | rs59086897 | 2 | 25145173 | A | T | 0.0208354 | 0.00157886 | 0.487593 | 9.20E-40 | 454823 |
| Leg fat mass (left) | rs12475388 | 2 | 27039792 | A | G | -0.0100934 | 0.00158861 | 0.48571 | 2.10E-10 | 454823 |
| Leg fat mass (left) | rs12468176 | 2 | 41655064 | G | C | 0.00901669 | 0.00164245 | 0.635444 | 4.00E-08 | 454823 |
| Leg fat mass (left) | rs35809007 | 2 | 47019521 | A | G | -0.0101754 | 0.00164802 | 0.36316 | 6.60E-10 | 454823 |
| Leg fat mass (left) | rs745249 | 2 | 105460333 | T | C | 0.0122685 | 0.00176144 | 0.281892 | 3.30E-12 | 454823 |
| Leg fat mass (left) | rs3748916 | 2 | 113984033 | A | G | -0.00882002 | 0.00157915 | 0.472628 | 2.30E-08 | 454823 |
| Leg fat mass (left) | rs4482463 | 2 | 205375909 | A | C | -0.0234802 | 0.0029721 | 0.923056 | 2.80E-15 | 454823 |
| Leg fat mass (left) | rs73985439 | 2 | 212299249 | C | A | 0.010987 | 0.0017154 | 0.307313 | 1.50E-10 | 454823 |
| Leg fat mass (left) | rs7568228 | 2 | 236848488 | C | G | -0.00875297 | 0.0015814 | 0.527095 | 3.10E-08 | 454823 |
| Leg fat mass (left) | rs13410783 | 2 | 36789166 | G | A | 0.0128124 | 0.00163693 | 0.369546 | 5.00E-15 | 454823 |
| Leg fat mass (left) | rs7607923 | 2 | 55323183 | A | G | -0.00936863 | 0.00164902 | 0.368738 | 1.30E-08 | 454823 |
| Leg fat mass (left) | rs7575523 | 2 | 59335104 | G | T | -0.0168195 | 0.00162022 | 0.603239 | 3.00E-25 | 454823 |
| Leg fat mass (left) | rs1446585 | 2 | 136407479 | G | A | -0.0125259 | 0.00180124 | 0.244611 | 3.50E-12 | 454823 |
| Leg fat mass (left) | rs62182430 | 2 | 172772837 | A | G | 0.0100164 | 0.00177161 | 0.272653 | 1.60E-08 | 454823 |
| Leg fat mass (left) | rs10209821 | 2 | 228980358 | T | C | 0.0138557 | 0.00166265 | 0.342621 | 7.90E-17 | 454823 |
| Leg fat mass (left) | rs361222 | 3 | 12922716 | T | A | -0.00933499 | 0.00164712 | 0.632505 | 1.40E-08 | 454823 |
| Leg fat mass (left) | rs7619139 | 3 | 25110415 | A | T | 0.010051 | 0.0016108 | 0.588641 | 4.40E-10 | 454823 |
| Leg fat mass (left) | rs6782714 | 3 | 71684845 | T | C | -0.00921602 | 0.00162576 | 0.409429 | 1.40E-08 | 454823 |
| Leg fat mass (left) | rs1454687 | 3 | 94038085 | G | C | -0.0156381 | 0.00158131 | 0.51534 | 4.60E-23 | 454823 |
| Leg fat mass (left) | rs12498044 | 3 | 131595531 | A | G | 0.017099 | 0.00176871 | 0.276898 | 4.10E-22 | 454823 |
| Leg fat mass (left) | rs6774894 | 3 | 196116393 | A | T | 0.0114845 | 0.0016479 | 0.35808 | 3.20E-12 | 454823 |
| Leg fat mass (left) | rs17639996 | 3 | 61269668 | A | G | -0.0185394 | 0.0022232 | 0.150085 | 7.50E-17 | 454823 |
| Leg fat mass (left) | rs529200 | 3 | 173114305 | G | A | 0.0127429 | 0.00158509 | 0.527774 | 9.00E-16 | 454823 |
| Leg fat mass (left) | rs13097918 | 3 | 35676330 | A | T | 0.0118999 | 0.00193602 | 0.212283 | 7.90E-10 | 454823 |
| Leg fat mass (left) | rs754635 | 3 | 42305131 | G | C | 0.0171686 | 0.00249103 | 0.886586 | 5.50E-12 | 454823 |
| Leg fat mass (left) | rs28350 | 3 | 42418446 | G | A | -0.0151271 | 0.00206867 | 0.820617 | 2.60E-13 | 454823 |
| Leg fat mass (left) | rs9968060 | 3 | 62471282 | T | C | 0.0102275 | 0.00168053 | 0.64261 | 1.20E-09 | 454823 |
| Leg fat mass (left) | rs11914525 | 3 | 85880768 | G | A | -0.0153155 | 0.00165364 | 0.354235 | 2.00E-20 | 454823 |
| Leg fat mass (left) | rs1471093 | 3 | 108031094 | A | G | 0.0105157 | 0.0016343 | 0.616762 | 1.20E-10 | 454823 |
| Leg fat mass (left) | rs2312193 | 3 | 141188399 | C | T | 0.0153825 | 0.00162633 | 0.386838 | 3.10E-21 | 454823 |
| Leg fat mass (left) | rs1554654 | 3 | 44044344 | T | C | -0.0124284 | 0.00158732 | 0.470557 | 4.90E-15 | 454823 |
| Leg fat mass (left) | rs9843653 | 3 | 49920571 | C | T | 0.0219026 | 0.0015824 | 0.511534 | 1.40E-43 | 454823 |
| Leg fat mass (left) | rs1436348 | 3 | 104612668 | G | A | 0.0126973 | 0.0016035 | 0.582735 | 2.40E-15 | 454823 |
| Leg fat mass (left) | rs1471740 | 3 | 136328270 | C | T | 0.0128352 | 0.00180571 | 0.740361 | 1.20E-12 | 454823 |
| Leg fat mass (left) | rs9289970 | 3 | 156301324 | C | A | -0.0121889 | 0.00221594 | 0.150092 | 3.80E-08 | 454823 |
| Leg fat mass (left) | rs73052033 | 3 | 185828465 | C | T | -0.0190966 | 0.00203949 | 0.185072 | 7.70E-21 | 454823 |
| Leg fat mass (left) | rs1801282 | 3 | 12393125 | G | C | 0.0235553 | 0.00243136 | 0.119541 | 3.40E-22 | 454823 |
| Leg fat mass (left) | rs75557510 | 3 | 84321469 | G | A | -0.0228844 | 0.00335023 | 0.060858 | 8.40E-12 | 454823 |
| Leg fat mass (left) | rs9839081 | 3 | 123051230 | A | G | -0.0117555 | 0.00171497 | 0.325086 | 7.10E-12 | 454823 |
| Leg fat mass (left) | rs1568489 | 3 | 153673681 | G | A | 0.0131111 | 0.00160302 | 0.573045 | 2.90E-16 | 454823 |
| Leg fat mass (left) | rs6444950 | 3 | 170602073 | A | G | 0.011954 | 0.00185861 | 0.237554 | 1.30E-10 | 454823 |
| Leg fat mass (left) | rs2606228 | 3 | 183537759 | C | A | -0.0101436 | 0.00166975 | 0.646337 | 1.20E-09 | 454823 |
| Leg fat mass (left) | rs2242189 | 4 | 38691024 | C | T | -0.00943864 | 0.00164227 | 0.381121 | 9.10E-09 | 454823 |
| Leg fat mass (left) | rs3113509 | 4 | 52932825 | T | C | -0.0125702 | 0.00178741 | 0.73197 | 2.00E-12 | 454823 |
| Leg fat mass (left) | rs12642970 | 4 | 16601492 | C | G | -0.00881528 | 0.00160023 | 0.441526 | 3.60E-08 | 454823 |
| Leg fat mass (left) | rs34811474 | 4 | 25408838 | A | G | -0.0168868 | 0.00187683 | 0.230831 | 2.30E-19 | 454823 |
| Leg fat mass (left) | rs10938398 | 4 | 45186139 | A | G | 0.0225645 | 0.0015997 | 0.433502 | 3.50E-45 | 454823 |
| Leg fat mass (left) | rs6815910 | 4 | 55495793 | A | T | -0.00976699 | 0.00159133 | 0.555699 | 8.40E-10 | 454823 |
| Leg fat mass (left) | rs13107325 | 4 | 103188709 | T | C | 0.0296478 | 0.00300954 | 0.074862 | 6.80E-23 | 454823 |
| Leg fat mass (left) | rs4240326 | 4 | 145839264 | G | A | -0.0119832 | 0.00159026 | 0.550147 | 4.90E-14 | 454823 |
| Leg fat mass (left) | rs113079574 | 4 | 147354089 | T | C | -0.0120804 | 0.00201632 | 0.192743 | 2.10E-09 | 454823 |
| Leg fat mass (left) | rs1296328 | 4 | 137083193 | C | A | -0.0137956 | 0.00160179 | 0.558992 | 7.10E-18 | 454823 |
| Leg fat mass (left) | rs2051559 | 4 | 3298800 | C | T | 0.0144179 | 0.00233852 | 0.13257 | 7.00E-10 | 454823 |
| Leg fat mass (left) | rs9917946 | 4 | 65651232 | G | T | -0.0104206 | 0.00161592 | 0.405053 | 1.10E-10 | 454823 |
| Leg fat mass (left) | rs4419475 | 4 | 96150044 | T | A | 0.0100977 | 0.00161095 | 0.407333 | 3.70E-10 | 454823 |
| Leg fat mass (left) | rs7683836 | 4 | 180167906 | A | G | -0.00947595 | 0.00159807 | 0.557261 | 3.00E-09 | 454823 |
| Leg fat mass (left) | rs73213484 | 4 | 28489339 | T | A | -0.0185567 | 0.00227268 | 0.141227 | 3.20E-16 | 454823 |
| Leg fat mass (left) | rs6847975 | 4 | 80812960 | A | G | 0.0101369 | 0.00165901 | 0.356164 | 1.00E-09 | 454823 |
| Leg fat mass (left) | rs1229984 | 4 | 100239319 | C | T | 0.0341592 | 0.00480295 | 0.97278 | 1.10E-12 | 454823 |
| Leg fat mass (left) | rs11099020 | 4 | 130724902 | T | C | -0.0108829 | 0.00165218 | 0.640526 | 4.50E-11 | 454823 |
| Leg fat mass (left) | rs148636479 | 4 | 164359678 | T | A | -0.0311314 | 0.0050666 | 0.028543 | 8.00E-10 | 454823 |
| Leg fat mass (left) | rs530255 | 4 | 171041408 | C | T | 0.00918762 | 0.00161001 | 0.411105 | 1.20E-08 | 454823 |
| Leg fat mass (left) | rs72739243 | 5 | 27176620 | C | T | -0.0101371 | 0.00175878 | 0.282669 | 8.20E-09 | 454823 |
| Leg fat mass (left) | rs35711462 | 5 | 50847577 | G | A | 0.0110165 | 0.00158745 | 0.511069 | 3.90E-12 | 454823 |
| Leg fat mass (left) | rs74288880 | 5 | 59275800 | T | C | -0.0136955 | 0.00248261 | 0.114807 | 3.50E-08 | 454823 |
| Leg fat mass (left) | rs2307111 | 5 | 75003678 | C | T | -0.0221475 | 0.00162005 | 0.395095 | 1.50E-42 | 454823 |
| Leg fat mass (left) | rs252749 | 5 | 77389973 | A | G | -0.0127188 | 0.00183521 | 0.245965 | 4.20E-12 | 454823 |
| Leg fat mass (left) | rs40071 | 5 | 107496102 | C | T | -0.0175692 | 0.00206861 | 0.17949 | 2.00E-17 | 454823 |
| Leg fat mass (left) | rs67913249 | 5 | 43204126 | G | C | -0.0104547 | 0.00167487 | 0.341801 | 4.30E-10 | 454823 |
| Leg fat mass (left) | rs1503526 | 5 | 63020706 | C | T | 0.0119223 | 0.00158408 | 0.479962 | 5.20E-14 | 454823 |
| Leg fat mass (left) | rs2610245 | 5 | 63978255 | G | A | -0.00981089 | 0.00161084 | 0.51788 | 1.10E-09 | 454823 |
| Leg fat mass (left) | rs11135450 | 5 | 95554016 | G | A | 0.0115884 | 0.00168881 | 0.668895 | 6.80E-12 | 454823 |
| Leg fat mass (left) | rs12517187 | 5 | 112444682 | T | C | 0.0100552 | 0.00160252 | 0.434544 | 3.50E-10 | 454823 |
| Leg fat mass (left) | rs10050620 | 5 | 63927239 | T | C | -0.00983109 | 0.00169114 | 0.325417 | 6.10E-09 | 454823 |
| Leg fat mass (left) | rs6595447 | 5 | 122750847 | C | T | -0.0119588 | 0.00201252 | 0.192641 | 2.80E-09 | 454823 |
| Leg fat mass (left) | rs7708584 | 5 | 153543466 | G | A | -0.0117534 | 0.00159862 | 0.572319 | 1.90E-13 | 454823 |
| Leg fat mass (left) | rs698147 | 5 | 3513485 | G | A | -0.010166 | 0.00159044 | 0.543494 | 1.60E-10 | 454823 |
| Leg fat mass (left) | rs7442885 | 5 | 87682877 | G | C | -0.0200257 | 0.00193265 | 0.214121 | 3.70E-25 | 454823 |
| Leg fat mass (left) | rs1477290 | 5 | 87988934 | C | T | 0.025718 | 0.00232253 | 0.136909 | 1.70E-28 | 454823 |
| Leg fat mass (left) | rs396755 | 5 | 104022239 | G | C | -0.00970216 | 0.00160179 | 0.571074 | 1.40E-09 | 454823 |
| Leg fat mass (left) | rs347551 | 5 | 119389031 | G | C | 0.0104983 | 0.00161095 | 0.472314 | 7.20E-11 | 454823 |
| Leg fat mass (left) | rs329118 | 5 | 133861663 | T | C | -0.0109359 | 0.0016056 | 0.419397 | 9.70E-12 | 454823 |
| Leg fat mass (left) | rs2133561 | 5 | 139086651 | T | A | -0.0121156 | 0.00164082 | 0.611098 | 1.50E-13 | 454823 |
| Leg fat mass (left) | rs2964023 | 5 | 153246412 | C | T | -0.0114901 | 0.00171642 | 0.692007 | 2.20E-11 | 454823 |
| Leg fat mass (left) | rs10516044 | 5 | 167604236 | C | G | 0.0137917 | 0.0024843 | 0.115987 | 2.80E-08 | 454823 |
| Leg fat mass (left) | rs245767 | 5 | 170525393 | G | A | 0.0134433 | 0.00178506 | 0.730362 | 5.00E-14 | 454823 |
| Leg fat mass (left) | rs9294260 | 6 | 83433228 | A | G | 0.0120043 | 0.0015923 | 0.476585 | 4.70E-14 | 454823 |
| Leg fat mass (left) | rs6938973 | 6 | 98421721 | C | T | 0.0161291 | 0.00161711 | 0.601535 | 2.00E-23 | 454823 |
| Leg fat mass (left) | rs13218383 | 6 | 120173501 | G | C | -0.0118006 | 0.00167599 | 0.335138 | 1.90E-12 | 454823 |
| Leg fat mass (left) | rs9389857 | 6 | 141372966 | T | C | 0.0202633 | 0.00355816 | 0.052435 | 1.20E-08 | 454823 |
| Leg fat mass (left) | rs28366156 | 6 | 31671498 | C | T | -0.0206386 | 0.00234647 | 0.130613 | 1.40E-18 | 454823 |
| Leg fat mass (left) | rs72892910 | 6 | 50816887 | T | G | 0.028555 | 0.00209864 | 0.172204 | 3.70E-42 | 454823 |
| Leg fat mass (left) | rs1266876 | 6 | 51781580 | T | C | 0.0105373 | 0.00165932 | 0.349563 | 2.10E-10 | 454823 |
| Leg fat mass (left) | rs6934060 | 6 | 80307308 | G | A | 0.0135443 | 0.00238709 | 0.125582 | 1.40E-08 | 454823 |
| Leg fat mass (left) | rs57989773 | 6 | 100629078 | C | T | 0.0111565 | 0.00189285 | 0.244915 | 3.80E-09 | 454823 |
| Leg fat mass (left) | rs9387013 | 6 | 111833720 | C | T | 0.0115267 | 0.00206028 | 0.180395 | 2.20E-08 | 454823 |
| Leg fat mass (left) | rs520829 | 6 | 160767905 | G | T | 0.00890644 | 0.0015862 | 0.476039 | 2.00E-08 | 454823 |
| Leg fat mass (left) | rs10947793 | 6 | 12142817 | G | A | -0.0126445 | 0.00164654 | 0.371727 | 1.60E-14 | 454823 |
| Leg fat mass (left) | rs1327259 | 6 | 51177811 | G | A | -0.0104051 | 0.00162925 | 0.387658 | 1.70E-10 | 454823 |
| Leg fat mass (left) | rs1031881 | 6 | 124921140 | G | T | 0.0122083 | 0.00210945 | 0.169262 | 7.10E-09 | 454823 |
| Leg fat mass (left) | rs10457469 | 6 | 126083658 | A | G | 0.0102223 | 0.00158389 | 0.523394 | 1.10E-10 | 454823 |
| Leg fat mass (left) | rs9480184 | 6 | 155987788 | T | C | 0.0117492 | 0.00194431 | 0.210761 | 1.50E-09 | 454823 |
| Leg fat mass (left) | rs35723993 | 6 | 163008197 | T | C | -0.0146067 | 0.00229694 | 0.137712 | 2.00E-10 | 454823 |
| Leg fat mass (left) | rs11242730 | 6 | 2030663 | T | G | 0.0113618 | 0.0018569 | 0.240316 | 9.40E-10 | 454823 |
| Leg fat mass (left) | rs11757278 | 6 | 13180454 | C | T | -0.0108864 | 0.00172088 | 0.303905 | 2.50E-10 | 454823 |
| Leg fat mass (left) | rs2744938 | 6 | 34552110 | G | A | 0.0336321 | 0.0022277 | 0.147382 | 1.70E-51 | 454823 |
| Leg fat mass (left) | rs34045288 | 6 | 40369081 | T | C | 0.0182643 | 0.00167704 | 0.33442 | 1.30E-27 | 454823 |
| Leg fat mass (left) | rs10499014 | 6 | 97947755 | G | C | -0.0126702 | 0.00179584 | 0.268657 | 1.70E-12 | 454823 |
| Leg fat mass (left) | rs2802295 | 6 | 108926496 | G | A | 0.0166898 | 0.00163582 | 0.626185 | 1.90E-24 | 454823 |
| Leg fat mass (left) | rs6569648 | 6 | 130349119 | T | C | -0.0146933 | 0.00185213 | 0.760863 | 2.10E-15 | 454823 |
| Leg fat mass (left) | rs62396185 | 6 | 26180634 | C | G | -0.0244135 | 0.00180481 | 0.260028 | 1.10E-41 | 454823 |
| Leg fat mass (left) | rs62407565 | 6 | 33535739 | G | A | 0.0122312 | 0.00176842 | 0.275511 | 4.60E-12 | 454823 |
| Leg fat mass (left) | rs7761673 | 6 | 70357368 | A | T | -0.0113452 | 0.00191392 | 0.219983 | 3.10E-09 | 454823 |
| Leg fat mass (left) | rs9449999 | 6 | 85371011 | G | A | -0.00899473 | 0.00161174 | 0.589167 | 2.40E-08 | 454823 |
| Leg fat mass (left) | rs765874 | 6 | 143185557 | A | T | -0.0096362 | 0.00158235 | 0.489295 | 1.10E-09 | 454823 |
| Leg fat mass (left) | rs35589149 | 7 | 6426273 | C | G | 0.0156729 | 0.00233814 | 0.132437 | 2.00E-11 | 454823 |
| Leg fat mass (left) | rs2470937 | 7 | 104579775 | A | T | 0.00902218 | 0.00159363 | 0.451435 | 1.50E-08 | 454823 |
| Leg fat mass (left) | rs2396625 | 7 | 113028634 | A | T | -0.0139754 | 0.00161288 | 0.421327 | 4.50E-18 | 454823 |
| Leg fat mass (left) | rs10236214 | 7 | 150668070 | T | C | 0.010112 | 0.00166095 | 0.642052 | 1.10E-09 | 454823 |
| Leg fat mass (left) | rs4947584 | 7 | 50572709 | T | A | 0.0107727 | 0.00166681 | 0.347769 | 1.00E-10 | 454823 |
| Leg fat mass (left) | rs11767811 | 7 | 71620988 | A | G | -0.0138761 | 0.00205263 | 0.181442 | 1.40E-11 | 454823 |
| Leg fat mass (left) | rs28457808 | 7 | 99023246 | G | C | -0.0149442 | 0.00214821 | 0.16308 | 3.50E-12 | 454823 |
| Leg fat mass (left) | rs10951992 | 7 | 6758938 | C | T | 0.00922759 | 0.00161576 | 0.439093 | 1.10E-08 | 454823 |
| Leg fat mass (left) | rs4307239 | 7 | 24354300 | G | A | 0.00885827 | 0.00159258 | 0.458844 | 2.70E-08 | 454823 |
| Leg fat mass (left) | rs2289379 | 7 | 44804225 | T | C | -0.0120048 | 0.00162588 | 0.395691 | 1.50E-13 | 454823 |
| Leg fat mass (left) | rs11525873 | 7 | 138817193 | C | T | -0.0147621 | 0.00267281 | 0.097691 | 3.30E-08 | 454823 |
| Leg fat mass (left) | rs17149254 | 7 | 76634463 | C | T | -0.0153929 | 0.00204951 | 0.80483 | 5.90E-14 | 454823 |
| Leg fat mass (left) | rs1182199 | 7 | 2862542 | A | C | -0.0111622 | 0.0017216 | 0.304431 | 9.00E-11 | 454823 |
| Leg fat mass (left) | rs215669 | 7 | 32378979 | A | G | -0.0135703 | 0.00163167 | 0.611674 | 9.00E-17 | 454823 |
| Leg fat mass (left) | rs4718964 | 7 | 70038969 | T | G | 0.0117239 | 0.00161329 | 0.413112 | 3.70E-13 | 454823 |
| Leg fat mass (left) | rs58862095 | 7 | 75081418 | T | C | -0.0153045 | 0.00160867 | 0.419273 | 1.80E-21 | 454823 |
| Leg fat mass (left) | rs1100237 | 7 | 77606013 | C | T | -0.00908104 | 0.00161485 | 0.600148 | 1.90E-08 | 454823 |
| Leg fat mass (left) | rs10248298 | 7 | 121963813 | A | C | 0.0119556 | 0.00164202 | 0.36592 | 3.30E-13 | 454823 |
| Leg fat mass (left) | rs117176448 | 8 | 27261138 | G | C | 0.0191565 | 0.00268396 | 0.096169 | 9.50E-13 | 454823 |
| Leg fat mass (left) | rs10954772 | 8 | 30863938 | C | T | -0.0134444 | 0.00171751 | 0.685214 | 5.00E-15 | 454823 |
| Leg fat mass (left) | rs77952793 | 8 | 60843497 | T | C | -0.0196452 | 0.00358737 | 0.052779 | 4.30E-08 | 454823 |
| Leg fat mass (left) | rs11778934 | 8 | 116551405 | G | C | -0.0106149 | 0.0015933 | 0.536201 | 2.70E-11 | 454823 |
| Leg fat mass (left) | rs1106761 | 8 | 142619234 | A | G | 0.012457 | 0.00164911 | 0.384027 | 4.20E-14 | 454823 |
| Leg fat mass (left) | rs4737188 | 8 | 64756657 | T | A | -0.00905227 | 0.00158807 | 0.473835 | 1.20E-08 | 454823 |
| Leg fat mass (left) | rs1871745 | 8 | 106457633 | G | A | 0.0111603 | 0.00196921 | 0.203566 | 1.40E-08 | 454823 |
| Leg fat mass (left) | rs4876611 | 8 | 116671848 | G | A | 0.0170489 | 0.00176574 | 0.720192 | 4.70E-22 | 454823 |
| Leg fat mass (left) | rs10099330 | 8 | 143383694 | G | A | 0.00990806 | 0.00159302 | 0.452933 | 5.00E-10 | 454823 |
| Leg fat mass (left) | rs7460093 | 8 | 144876159 | A | G | 0.00881813 | 0.00160079 | 0.531142 | 3.60E-08 | 454823 |
| Leg fat mass (left) | rs35792595 | 8 | 14318616 | A | T | 0.0113422 | 0.00174161 | 0.297366 | 7.40E-11 | 454823 |
| Leg fat mass (left) | rs12679106 | 8 | 73443198 | T | G | -0.0184045 | 0.00175212 | 0.709171 | 8.30E-26 | 454823 |
| Leg fat mass (left) | rs10100245 | 8 | 77226919 | A | G | 0.0152016 | 0.00159896 | 0.564468 | 2.00E-21 | 454823 |
| Leg fat mass (left) | rs78565420 | 8 | 85703065 | T | C | 0.0209533 | 0.00364059 | 0.051977 | 8.60E-09 | 454823 |
| Leg fat mass (left) | rs2954021 | 8 | 126482077 | G | A | 0.0113535 | 0.00158388 | 0.504595 | 7.60E-13 | 454823 |
| Leg fat mass (left) | rs7004825 | 8 | 11031472 | C | T | -0.0117388 | 0.00159775 | 0.529798 | 2.00E-13 | 454823 |
| Leg fat mass (left) | rs12681205 | 8 | 93298074 | A | C | -0.00880561 | 0.0016048 | 0.578741 | 4.10E-08 | 454823 |
| Leg fat mass (left) | rs12680342 | 8 | 95359638 | G | T | -0.0118672 | 0.00188184 | 0.229099 | 2.90E-10 | 454823 |
| Leg fat mass (left) | rs7828631 | 8 | 132875320 | T | C | 0.0146776 | 0.00253629 | 0.109935 | 7.20E-09 | 454823 |
| Leg fat mass (left) | rs56893062 | 8 | 25662655 | G | T | 0.0108053 | 0.00172531 | 0.303331 | 3.80E-10 | 454823 |
| Leg fat mass (left) | rs12681792 | 8 | 62054463 | A | C | 0.0113239 | 0.00201571 | 0.19265 | 1.90E-08 | 454823 |
| Leg fat mass (left) | rs7865801 | 9 | 14745886 | A | G | -0.00938786 | 0.00165563 | 0.629296 | 1.40E-08 | 454823 |
| Leg fat mass (left) | rs13292699 | 9 | 15910044 | C | A | -0.017798 | 0.00160102 | 0.433726 | 1.00E-28 | 454823 |
| Leg fat mass (left) | rs17770336 | 9 | 28414625 | T | C | 0.0178052 | 0.00169135 | 0.322453 | 6.50E-26 | 454823 |
| Leg fat mass (left) | rs2095484 | 9 | 11452408 | C | T | -0.00951209 | 0.00162894 | 0.387409 | 5.20E-09 | 454823 |
| Leg fat mass (left) | rs10820852 | 9 | 94186973 | A | C | -0.011473 | 0.00177362 | 0.27631 | 9.90E-11 | 454823 |
| Leg fat mass (left) | rs113132247 | 9 | 131026108 | A | G | 0.0158763 | 0.00220766 | 0.153012 | 6.40E-13 | 454823 |
| Leg fat mass (left) | rs1330199 | 9 | 27760946 | T | G | -0.00903357 | 0.00159135 | 0.483144 | 1.40E-08 | 454823 |
| Leg fat mass (left) | rs16916303 | 9 | 30823761 | G | A | -0.0146771 | 0.00246652 | 0.119775 | 2.70E-09 | 454823 |
| Leg fat mass (left) | rs7034554 | 9 | 37081301 | G | A | -0.0100856 | 0.001636 | 0.373725 | 7.10E-10 | 454823 |
| Leg fat mass (left) | rs1360201 | 9 | 73796450 | T | C | 0.00916473 | 0.00158426 | 0.481627 | 7.30E-09 | 454823 |
| Leg fat mass (left) | rs1475535 | 9 | 92212610 | A | T | 0.0106802 | 0.0015894 | 0.498076 | 1.80E-11 | 454823 |
| Leg fat mass (left) | rs10989067 | 9 | 103119634 | A | G | 0.0133001 | 0.00170142 | 0.315885 | 5.40E-15 | 454823 |
| Leg fat mass (left) | rs10760277 | 9 | 126093999 | T | C | 0.0106648 | 0.00163306 | 0.385097 | 6.60E-11 | 454823 |
| Leg fat mass (left) | rs10756798 | 9 | 16739763 | T | C | -0.0124984 | 0.00165279 | 0.642453 | 4.00E-14 | 454823 |
| Leg fat mass (left) | rs10992854 | 9 | 96437565 | C | T | -0.011937 | 0.00170804 | 0.681938 | 2.80E-12 | 454823 |
| Leg fat mass (left) | rs7038943 | 9 | 120377178 | C | T | -0.0113553 | 0.00167125 | 0.338802 | 1.10E-11 | 454823 |
| Leg fat mass (left) | rs10733682 | 9 | 129460914 | G | A | -0.00900339 | 0.00161147 | 0.526668 | 2.30E-08 | 454823 |
| Leg fat mass (left) | rs12259464 | 10 | 53680099 | A | G | 0.00945191 | 0.00159162 | 0.484596 | 2.90E-09 | 454823 |
| Leg fat mass (left) | rs577525 | 10 | 99769388 | C | T | 0.0150571 | 0.00159653 | 0.562064 | 4.10E-21 | 454823 |
| Leg fat mass (left) | rs10903791 | 10 | 2569491 | A | G | 0.00895739 | 0.00162321 | 0.603709 | 3.40E-08 | 454823 |
| Leg fat mass (left) | rs11012732 | 10 | 21830104 | G | A | 0.0185305 | 0.00168291 | 0.331715 | 3.40E-28 | 454823 |
| Leg fat mass (left) | rs71495038 | 10 | 33971383 | A | G | 0.0204748 | 0.00297178 | 0.076949 | 5.60E-12 | 454823 |
| Leg fat mass (left) | rs7070670 | 10 | 61842645 | T | C | -0.00974054 | 0.00169744 | 0.327986 | 9.60E-09 | 454823 |
| Leg fat mass (left) | rs7078200 | 10 | 72368595 | G | A | 0.0096801 | 0.0017011 | 0.318595 | 1.30E-08 | 454823 |
| Leg fat mass (left) | rs10887578 | 10 | 88096047 | C | G | 0.0112227 | 0.00159332 | 0.497529 | 1.90E-12 | 454823 |
| Leg fat mass (left) | rs4290163 | 10 | 104610926 | T | G | 0.0109358 | 0.00162289 | 0.392694 | 1.60E-11 | 454823 |
| Leg fat mass (left) | rs9421249 | 10 | 118623322 | T | C | 0.0154104 | 0.00180664 | 0.260991 | 1.50E-17 | 454823 |
| Leg fat mass (left) | rs7893571 | 10 | 16750129 | T | G | 0.0117183 | 0.00168327 | 0.665916 | 3.40E-12 | 454823 |
| Leg fat mass (left) | rs67609008 | 10 | 126640936 | C | T | 0.012975 | 0.00176389 | 0.283587 | 1.90E-13 | 454823 |
| Leg fat mass (left) | rs35972789 | 10 | 75519691 | A | C | -0.0268419 | 0.00416938 | 0.03741 | 1.20E-10 | 454823 |
| Leg fat mass (left) | rs7916385 | 10 | 102470432 | T | C | -0.0180416 | 0.00241026 | 0.15025 | 7.10E-14 | 454823 |
| Leg fat mass (left) | rs35519679 | 10 | 114818754 | A | G | -0.0109797 | 0.00184263 | 0.252807 | 2.50E-09 | 454823 |
| Leg fat mass (left) | rs11245344 | 10 | 126418782 | T | C | 0.00928062 | 0.00160314 | 0.571127 | 7.10E-09 | 454823 |
| Leg fat mass (left) | rs10824163 | 10 | 76136589 | A | G | 0.014264 | 0.00240766 | 0.123626 | 3.10E-09 | 454823 |
| Leg fat mass (left) | rs17399739 | 10 | 87490850 | G | A | 0.0198896 | 0.00313134 | 0.068919 | 2.10E-10 | 454823 |
| Leg fat mass (left) | rs2172131 | 10 | 133978962 | C | T | -0.012605 | 0.00160515 | 0.578566 | 4.10E-15 | 454823 |
| Leg fat mass (left) | rs10766451 | 11 | 2917510 | T | C | 0.0104903 | 0.0017056 | 0.324039 | 7.70E-10 | 454823 |
| Leg fat mass (left) | rs7938352 | 11 | 27502554 | T | C | 0.0141008 | 0.00181271 | 0.740688 | 7.30E-15 | 454823 |
| Leg fat mass (left) | rs1013402 | 11 | 27712381 | G | A | 0.0235799 | 0.00169797 | 0.318441 | 7.60E-44 | 454823 |
| Leg fat mass (left) | rs7124681 | 11 | 47529947 | A | C | 0.0174147 | 0.00160758 | 0.408395 | 2.40E-27 | 454823 |
| Leg fat mass (left) | rs61903695 | 11 | 89922417 | G | A | 0.011818 | 0.00181995 | 0.254898 | 8.40E-11 | 454823 |
| Leg fat mass (left) | rs35184536 | 11 | 116778813 | G | A | 0.0215977 | 0.00333639 | 0.060072 | 9.60E-11 | 454823 |
| Leg fat mass (left) | rs7944782 | 11 | 130795698 | G | T | 0.0114282 | 0.0015921 | 0.509785 | 7.10E-13 | 454823 |
| Leg fat mass (left) | rs11533200 | 11 | 131955594 | A | G | -0.0106144 | 0.00172542 | 0.307845 | 7.70E-10 | 454823 |
| Leg fat mass (left) | rs12364470 | 11 | 134601012 | G | T | 0.0141049 | 0.00213604 | 0.164518 | 4.00E-11 | 454823 |
| Leg fat mass (left) | rs1782508 | 11 | 30243795 | G | C | -0.0117462 | 0.00166449 | 0.655508 | 1.70E-12 | 454823 |
| Leg fat mass (left) | rs719802 | 11 | 113234679 | C | T | -0.0121706 | 0.00162582 | 0.614405 | 7.10E-14 | 454823 |
| Leg fat mass (left) | rs2458764 | 11 | 131451832 | C | A | 0.00948599 | 0.00160124 | 0.566118 | 3.10E-09 | 454823 |
| Leg fat mass (left) | rs10896012 | 11 | 65278461 | C | T | 0.0156887 | 0.00192495 | 0.21739 | 3.60E-16 | 454823 |
| Leg fat mass (left) | rs11603984 | 11 | 85238368 | T | G | -0.015122 | 0.0023196 | 0.135116 | 7.10E-11 | 454823 |
| Leg fat mass (left) | rs28711392 | 11 | 13349559 | C | T | -0.0124296 | 0.00165626 | 0.367362 | 6.20E-14 | 454823 |
| Leg fat mass (left) | rs9783304 | 11 | 43660255 | T | G | -0.0178461 | 0.00171233 | 0.689275 | 2.00E-25 | 454823 |
| Leg fat mass (left) | rs55707359 | 11 | 46159333 | G | T | 0.040895 | 0.00650554 | 0.015448 | 3.30E-10 | 454823 |
| Leg fat mass (left) | rs479018 | 11 | 66060546 | A | G | -0.0157771 | 0.00170943 | 0.332507 | 2.70E-20 | 454823 |
| Leg fat mass (left) | rs2507909 | 11 | 115010867 | G | A | -0.00937037 | 0.00160128 | 0.479451 | 4.90E-09 | 454823 |
| Leg fat mass (left) | rs1502317 | 11 | 8682018 | T | C | -0.015394 | 0.00177391 | 0.276546 | 4.00E-18 | 454823 |
| Leg fat mass (left) | rs10160769 | 11 | 76474827 | C | G | -0.0107495 | 0.0019406 | 0.217495 | 3.00E-08 | 454823 |
| Leg fat mass (left) | rs494048 | 11 | 118961231 | C | T | 0.0100341 | 0.00161757 | 0.537582 | 5.50E-10 | 454823 |
| Leg fat mass (left) | rs329651 | 11 | 133767622 | T | G | 0.012232 | 0.00200532 | 0.804099 | 1.10E-09 | 454823 |
| Leg fat mass (left) | rs10505836 | 12 | 19288508 | C | A | 0.0157425 | 0.0022995 | 0.859995 | 7.60E-12 | 454823 |
| Leg fat mass (left) | rs3730071 | 12 | 49168798 | A | C | -0.0276949 | 0.00462622 | 0.030239 | 2.10E-09 | 454823 |
| Leg fat mass (left) | rs7132908 | 12 | 50263148 | A | G | 0.0231621 | 0.00162912 | 0.384444 | 7.10E-46 | 454823 |
| Leg fat mass (left) | rs3764002 | 12 | 108618630 | T | C | -0.0148024 | 0.00180163 | 0.261509 | 2.10E-16 | 454823 |
| Leg fat mass (left) | rs11066028 | 12 | 112245170 | C | A | 0.00968656 | 0.00177527 | 0.276181 | 4.90E-08 | 454823 |
| Leg fat mass (left) | rs12316080 | 12 | 124438217 | T | C | 0.0109451 | 0.0016759 | 0.335378 | 6.50E-11 | 454823 |
| Leg fat mass (left) | rs2733296 | 12 | 41844584 | G | A | 0.0128025 | 0.00159078 | 0.47865 | 8.40E-16 | 454823 |
| Leg fat mass (left) | rs7967402 | 12 | 60962321 | G | A | 0.0124932 | 0.00209863 | 0.172896 | 2.60E-09 | 454823 |
| Leg fat mass (left) | rs10878349 | 12 | 66327632 | G | A | -0.00933127 | 0.00158804 | 0.513109 | 4.20E-09 | 454823 |
| Leg fat mass (left) | rs76895963 | 12 | 4384844 | G | T | 0.0482159 | 0.00613971 | 0.02066 | 4.10E-15 | 454823 |
| Leg fat mass (left) | rs61754230 | 12 | 72179446 | T | C | 0.0337934 | 0.00569506 | 0.019709 | 3.00E-09 | 454823 |
| Leg fat mass (left) | rs12427047 | 12 | 90213070 | T | C | -0.015036 | 0.00184675 | 0.242762 | 3.90E-16 | 454823 |
| Leg fat mass (left) | rs7966251 | 12 | 103731395 | A | G | -0.0125287 | 0.0018198 | 0.255016 | 5.80E-12 | 454823 |
| Leg fat mass (left) | rs1814592 | 12 | 122438187 | A | G | -0.0115073 | 0.0017461 | 0.290033 | 4.40E-11 | 454823 |
| Leg fat mass (left) | rs147730268 | 12 | 123024476 | T | G | -0.0315484 | 0.00287015 | 0.087268 | 4.20E-28 | 454823 |
| Leg fat mass (left) | rs78719460 | 12 | 133395038 | A | G | 0.0108832 | 0.00171542 | 0.308411 | 2.20E-10 | 454823 |
| Leg fat mass (left) | rs55726687 | 12 | 991306 | A | G | 0.0188569 | 0.00194343 | 0.209741 | 2.90E-22 | 454823 |
| Leg fat mass (left) | rs2292238 | 12 | 56493822 | C | A | -0.0106308 | 0.00161367 | 0.407673 | 4.50E-11 | 454823 |
| Leg fat mass (left) | rs11105842 | 12 | 91243910 | A | G | -0.0105985 | 0.00165064 | 0.367523 | 1.40E-10 | 454823 |
| Leg fat mass (left) | rs2111281 | 12 | 108165360 | C | A | 0.011133 | 0.00164459 | 0.366944 | 1.30E-11 | 454823 |
| Leg fat mass (left) | rs6561937 | 13 | 58257667 | A | T | -0.012864 | 0.00184535 | 0.753693 | 3.10E-12 | 454823 |
| Leg fat mass (left) | rs1967772 | 13 | 28036062 | A | G | -0.0129557 | 0.00176521 | 0.285209 | 2.10E-13 | 454823 |
| Leg fat mass (left) | rs4055791 | 13 | 59266053 | T | C | -0.0122186 | 0.00160878 | 0.416764 | 3.10E-14 | 454823 |
| Leg fat mass (left) | rs1441264 | 13 | 79580919 | A | G | 0.0135418 | 0.0016488 | 0.59369 | 2.20E-16 | 454823 |
| Leg fat mass (left) | rs9522183 | 13 | 111977280 | T | G | -0.012436 | 0.00160822 | 0.561745 | 1.10E-14 | 454823 |
| Leg fat mass (left) | rs4942098 | 13 | 42774961 | C | A | -0.0128942 | 0.00212973 | 0.166132 | 1.40E-09 | 454823 |
| Leg fat mass (left) | rs9571687 | 13 | 67472713 | A | C | -0.0097312 | 0.00168972 | 0.329438 | 8.50E-09 | 454823 |
| Leg fat mass (left) | rs61969511 | 13 | 86484042 | A | G | 0.0125214 | 0.00178232 | 0.279005 | 2.10E-12 | 454823 |
| Leg fat mass (left) | rs56399737 | 13 | 33381721 | T | C | -0.0110621 | 0.00159917 | 0.449163 | 4.60E-12 | 454823 |
| Leg fat mass (left) | rs9522279 | 13 | 112221296 | T | C | 0.0123066 | 0.00160826 | 0.423107 | 2.00E-14 | 454823 |
| Leg fat mass (left) | rs4477562 | 13 | 54104968 | T | C | 0.0231031 | 0.00238731 | 0.128606 | 3.80E-22 | 454823 |
| Leg fat mass (left) | rs12877270 | 13 | 97047020 | A | G | 0.0102343 | 0.00160806 | 0.442077 | 2.00E-10 | 454823 |
| Leg fat mass (left) | rs11841757 | 13 | 99242255 | G | A | -0.0120338 | 0.0018577 | 0.239514 | 9.30E-11 | 454823 |
| Leg fat mass (left) | rs8020365 | 14 | 79937216 | A | T | 0.0221819 | 0.00191885 | 0.22042 | 6.60E-31 | 454823 |
| Leg fat mass (left) | rs113624107 | 14 | 88326386 | A | G | 0.0104249 | 0.00189712 | 0.225893 | 3.90E-08 | 454823 |
| Leg fat mass (left) | rs3803286 | 14 | 103246470 | G | A | -0.014904 | 0.00168087 | 0.666753 | 7.50E-19 | 454823 |
| Leg fat mass (left) | rs1268403 | 14 | 21976476 | C | T | -0.0110131 | 0.00196932 | 0.20502 | 2.20E-08 | 454823 |
| Leg fat mass (left) | rs9788550 | 14 | 29681138 | C | G | -0.017783 | 0.00184379 | 0.247499 | 5.20E-22 | 454823 |
| Leg fat mass (left) | rs79197301 | 14 | 41327292 | A | T | 0.0179262 | 0.00288142 | 0.082571 | 4.90E-10 | 454823 |
| Leg fat mass (left) | rs12885458 | 14 | 47303114 | G | T | -0.0124828 | 0.00158757 | 0.507974 | 3.80E-15 | 454823 |
| Leg fat mass (left) | rs217672 | 14 | 62361021 | C | A | 0.0133615 | 0.00178641 | 0.271729 | 7.50E-14 | 454823 |
| Leg fat mass (left) | rs12890931 | 14 | 69753369 | G | T | 0.0112053 | 0.00165916 | 0.36243 | 1.40E-11 | 454823 |
| Leg fat mass (left) | rs6575340 | 14 | 94023972 | A | G | 0.0154889 | 0.00165156 | 0.636029 | 6.70E-21 | 454823 |
| Leg fat mass (left) | rs4430672 | 14 | 63094407 | C | T | -0.0117423 | 0.00198864 | 0.800931 | 3.50E-09 | 454823 |
| Leg fat mass (left) | rs12881629 | 14 | 101146413 | G | A | 0.0195078 | 0.00287529 | 0.082641 | 1.20E-11 | 454823 |
| Leg fat mass (left) | rs61992671 | 14 | 101531854 | G | A | -0.0122404 | 0.00165758 | 0.492058 | 1.50E-13 | 454823 |
| Leg fat mass (left) | rs2143975 | 14 | 33297398 | G | C | -0.0133604 | 0.00160025 | 0.533009 | 6.90E-17 | 454823 |
| Leg fat mass (left) | rs143121872 | 14 | 47893217 | C | T | -0.0334925 | 0.00575936 | 0.022529 | 6.10E-09 | 454823 |
| Leg fat mass (left) | rs9944241 | 15 | 51898058 | C | T | -0.0118585 | 0.00165293 | 0.484334 | 7.30E-13 | 454823 |
| Leg fat mass (left) | rs11161335 | 15 | 27004095 | A | T | 0.00882772 | 0.0016042 | 0.542137 | 3.70E-08 | 454823 |
| Leg fat mass (left) | rs11071646 | 15 | 62273994 | A | G | -0.0311672 | 0.00540351 | 0.02212 | 8.00E-09 | 454823 |
| Leg fat mass (left) | rs34769775 | 15 | 80989172 | T | C | -0.0134404 | 0.00173552 | 0.297429 | 9.60E-15 | 454823 |
| Leg fat mass (left) | rs1871360 | 15 | 95276540 | A | T | -0.0104852 | 0.00166378 | 0.366637 | 2.90E-10 | 454823 |
| Leg fat mass (left) | rs2120450 | 15 | 53101580 | A | T | 0.0146304 | 0.00226745 | 0.144785 | 1.10E-10 | 454823 |
| Leg fat mass (left) | rs7172082 | 15 | 66860730 | G | A | -0.0121209 | 0.00203525 | 0.189787 | 2.60E-09 | 454823 |
| Leg fat mass (left) | rs4842920 | 15 | 84539424 | T | G | -0.0166967 | 0.00177046 | 0.280036 | 4.10E-21 | 454823 |
| Leg fat mass (left) | rs11854132 | 15 | 99229330 | A | G | -0.0127948 | 0.00178809 | 0.270199 | 8.30E-13 | 454823 |
| Leg fat mass (left) | rs4924136 | 15 | 37593459 | A | G | -0.00972328 | 0.0017049 | 0.31638 | 1.20E-08 | 454823 |
| Leg fat mass (left) | rs4776970 | 15 | 68080886 | T | A | -0.0192703 | 0.00165172 | 0.357815 | 1.90E-31 | 454823 |
| Leg fat mass (left) | rs12439200 | 15 | 73086731 | A | G | -0.01536 | 0.00186365 | 0.238638 | 1.70E-16 | 454823 |
| Leg fat mass (left) | rs35154326 | 16 | 24862414 | G | A | -0.013007 | 0.00178996 | 0.274042 | 3.70E-13 | 454823 |
| Leg fat mass (left) | rs7206608 | 16 | 82872628 | G | C | 0.0113049 | 0.00169683 | 0.321563 | 2.70E-11 | 454823 |
| Leg fat mass (left) | rs9926784 | 16 | 19941968 | C | T | -0.0132388 | 0.00204062 | 0.184499 | 8.70E-11 | 454823 |
| Leg fat mass (left) | rs12921077 | 16 | 66739515 | A | G | 0.00945877 | 0.0016863 | 0.329943 | 2.00E-08 | 454823 |
| Leg fat mass (left) | rs862320 | 16 | 69651866 | T | C | -0.0140998 | 0.00161289 | 0.409793 | 2.30E-18 | 454823 |
| Leg fat mass (left) | rs12926311 | 16 | 406427 | C | G | -0.0103795 | 0.00166215 | 0.353554 | 4.20E-10 | 454823 |
| Leg fat mass (left) | rs13333747 | 16 | 2175373 | C | T | -0.0170048 | 0.00205952 | 0.182741 | 1.50E-16 | 454823 |
| Leg fat mass (left) | rs2660241 | 16 | 4940023 | C | T | 0.0119593 | 0.00164736 | 0.364837 | 3.90E-13 | 454823 |
| Leg fat mass (left) | rs7498665 | 16 | 28883241 | G | A | 0.0218807 | 0.00161845 | 0.399537 | 1.20E-41 | 454823 |
| Leg fat mass (left) | rs3814883 | 16 | 29994922 | T | C | 0.018011 | 0.00158972 | 0.482233 | 9.40E-30 | 454823 |
| Leg fat mass (left) | rs56094641 | 16 | 53806453 | G | A | 0.0522148 | 0.00161351 | 0.404647 | 1.00E-200 | 454823 |
| Leg fat mass (left) | rs756717 | 16 | 72996162 | A | G | -0.00964084 | 0.00163717 | 0.399006 | 3.90E-09 | 454823 |
| Leg fat mass (left) | rs879620 | 16 | 4015729 | T | C | 0.0192477 | 0.0016312 | 0.613278 | 3.90E-32 | 454823 |
| Leg fat mass (left) | rs1057042 | 16 | 89857622 | C | T | -0.0105008 | 0.00169199 | 0.326586 | 5.40E-10 | 454823 |
| Leg fat mass (left) | rs11075263 | 16 | 9367090 | T | C | -0.0112803 | 0.0019646 | 0.207841 | 9.40E-09 | 454823 |
| Leg fat mass (left) | rs117342986 | 16 | 54267868 | T | C | 0.0326762 | 0.00517885 | 0.026446 | 2.80E-10 | 454823 |
| Leg fat mass (left) | rs12926250 | 16 | 72213316 | T | G | 0.014407 | 0.0025852 | 0.105147 | 2.50E-08 | 454823 |
| Leg fat mass (left) | rs1025065 | 16 | 82451159 | G | T | -0.00931661 | 0.00165242 | 0.639208 | 1.70E-08 | 454823 |
| Leg fat mass (left) | rs11656076 | 17 | 31464270 | A | G | -0.0109442 | 0.00189919 | 0.224677 | 8.30E-09 | 454823 |
| Leg fat mass (left) | rs6502482 | 17 | 15899241 | G | C | 0.00904878 | 0.00159924 | 0.561502 | 1.50E-08 | 454823 |
| Leg fat mass (left) | rs11870618 | 17 | 47124025 | A | G | 0.0146401 | 0.00234036 | 0.13252 | 4.00E-10 | 454823 |
| Leg fat mass (left) | rs113866544 | 17 | 46270606 | C | T | 0.0281997 | 0.0031465 | 0.068318 | 3.20E-19 | 454823 |
| Leg fat mass (left) | rs17744603 | 17 | 52926401 | G | C | 0.0128506 | 0.00212965 | 0.168758 | 1.60E-09 | 454823 |
| Leg fat mass (left) | rs4790841 | 17 | 1835482 | T | C | -0.0217007 | 0.00220284 | 0.154507 | 6.80E-23 | 454823 |
| Leg fat mass (left) | rs35537311 | 17 | 71126150 | T | C | -0.00929916 | 0.00162955 | 0.388514 | 1.20E-08 | 454823 |
| Leg fat mass (left) | rs7774 | 17 | 4801163 | A | C | 0.0113537 | 0.00172378 | 0.310479 | 4.50E-11 | 454823 |
| Leg fat mass (left) | rs8078135 | 17 | 21268583 | T | C | -0.0104824 | 0.00159118 | 0.489864 | 4.50E-11 | 454823 |
| Leg fat mass (left) | rs1005551 | 17 | 34949361 | T | C | -0.0128628 | 0.00161291 | 0.408066 | 1.50E-15 | 454823 |
| Leg fat mass (left) | rs11656758 | 17 | 42301541 | G | A | 0.0107352 | 0.00167127 | 0.343118 | 1.30E-10 | 454823 |
| Leg fat mass (left) | rs7218014 | 17 | 65832016 | C | T | 0.0198158 | 0.00199613 | 0.197304 | 3.20E-23 | 454823 |
| Leg fat mass (left) | rs11150745 | 17 | 78757626 | G | A | -0.0165473 | 0.00170578 | 0.317698 | 3.00E-22 | 454823 |
| Leg fat mass (left) | rs35867081 | 17 | 79047278 | G | A | -0.0115901 | 0.00159408 | 0.512198 | 3.60E-13 | 454823 |
| Leg fat mass (left) | rs1788808 | 18 | 21090023 | G | A | -0.0190089 | 0.0015882 | 0.494886 | 5.20E-33 | 454823 |
| Leg fat mass (left) | rs34728432 | 18 | 31255918 | G | A | 0.00923052 | 0.00161186 | 0.436363 | 1.00E-08 | 454823 |
| Leg fat mass (left) | rs59499656 | 18 | 40768309 | T | A | -0.012178 | 0.00167458 | 0.343214 | 3.50E-13 | 454823 |
| Leg fat mass (left) | rs9951619 | 18 | 56882326 | G | T | 0.0111082 | 0.00188843 | 0.767274 | 4.00E-09 | 454823 |
| Leg fat mass (left) | rs2472643 | 18 | 76753063 | T | C | -0.0160917 | 0.0029279 | 0.080636 | 3.90E-08 | 454823 |
| Leg fat mass (left) | rs1945160 | 18 | 22164216 | A | G | -0.0097153 | 0.00164358 | 0.375864 | 3.40E-09 | 454823 |
| Leg fat mass (left) | rs11664848 | 18 | 42575661 | G | C | 0.00955996 | 0.00168001 | 0.659618 | 1.30E-08 | 454823 |
| Leg fat mass (left) | rs9955276 | 18 | 1839339 | T | C | 0.0139245 | 0.00226648 | 0.144427 | 8.10E-10 | 454823 |
| Leg fat mass (left) | rs8093356 | 18 | 2664532 | T | C | -0.0107481 | 0.00189583 | 0.226985 | 1.40E-08 | 454823 |
| Leg fat mass (left) | rs2276190 | 18 | 63430340 | A | G | 0.0110105 | 0.00177354 | 0.277439 | 5.40E-10 | 454823 |
| Leg fat mass (left) | rs784257 | 18 | 53397199 | C | T | 0.0115126 | 0.0020419 | 0.812499 | 1.70E-08 | 454823 |
| Leg fat mass (left) | rs12960971 | 18 | 39671432 | T | C | 0.0148547 | 0.0025717 | 0.107053 | 7.60E-09 | 454823 |
| Leg fat mass (left) | rs6567160 | 18 | 57829135 | C | T | 0.0389018 | 0.00187606 | 0.23266 | 1.60E-95 | 454823 |
| Leg fat mass (left) | rs57636386 | 18 | 58048295 | C | T | -0.0298206 | 0.00286954 | 0.08384 | 2.70E-25 | 454823 |
| Leg fat mass (left) | rs73026725 | 19 | 31017686 | A | C | -0.0138809 | 0.00220303 | 0.153583 | 3.00E-10 | 454823 |
| Leg fat mass (left) | rs3764625 | 19 | 49649051 | G | T | -0.00941743 | 0.00161418 | 0.587532 | 5.40E-09 | 454823 |
| Leg fat mass (left) | rs62104473 | 19 | 30289779 | T | C | 0.0152395 | 0.00169448 | 0.328413 | 2.40E-19 | 454823 |
| Leg fat mass (left) | rs10423928 | 19 | 46182304 | A | T | -0.0263745 | 0.00200103 | 0.19443 | 1.10E-39 | 454823 |
| Leg fat mass (left) | rs12986231 | 19 | 18469017 | C | T | -0.0135348 | 0.00180936 | 0.268008 | 7.40E-14 | 454823 |
| Leg fat mass (left) | rs10404726 | 19 | 18834514 | T | C | -0.015115 | 0.00159233 | 0.465531 | 2.30E-21 | 454823 |
| Leg fat mass (left) | rs7258937 | 19 | 33938800 | T | C | 0.0105984 | 0.00158868 | 0.50804 | 2.50E-11 | 454823 |
| Leg fat mass (left) | rs7259070 | 19 | 47562509 | C | T | 0.0142998 | 0.00163126 | 0.596194 | 1.80E-18 | 454823 |
| Leg fat mass (left) | rs56356382 | 19 | 4064057 | C | T | -0.0163239 | 0.00202038 | 0.192342 | 6.50E-16 | 454823 |
| Leg fat mass (left) | rs4808762 | 19 | 18326222 | C | T | 0.0166019 | 0.00174627 | 0.290963 | 2.00E-21 | 454823 |
| Leg fat mass (left) | rs429358 | 19 | 45411941 | C | T | -0.0222874 | 0.00219844 | 0.154047 | 3.80E-24 | 454823 |
| Leg fat mass (left) | rs2289286 | 19 | 1822668 | C | T | -0.0106831 | 0.00195328 | 0.209582 | 4.50E-08 | 454823 |
| Leg fat mass (left) | rs6030803 | 20 | 41986507 | C | T | -0.0150142 | 0.00239418 | 0.126638 | 3.60E-10 | 454823 |
| Leg fat mass (left) | rs13043475 | 20 | 51209603 | G | A | -0.0217019 | 0.00202742 | 0.190607 | 9.70E-27 | 454823 |
| Leg fat mass (left) | rs1056441 | 20 | 62370349 | C | T | 0.011732 | 0.00169476 | 0.675286 | 4.40E-12 | 454823 |
| Leg fat mass (left) | rs2151447 | 20 | 12702515 | T | C | -0.00936746 | 0.00167142 | 0.348605 | 2.10E-08 | 454823 |
| Leg fat mass (left) | rs4456769 | 20 | 25190777 | T | C | 0.0125051 | 0.00168329 | 0.33338 | 1.10E-13 | 454823 |
| Leg fat mass (left) | rs13041173 | 20 | 32542814 | G | A | 0.0100634 | 0.0016751 | 0.34155 | 1.90E-09 | 454823 |
| Leg fat mass (left) | rs3904162 | 20 | 44913138 | G | C | -0.0089962 | 0.00159268 | 0.542928 | 1.60E-08 | 454823 |
| Leg fat mass (left) | rs1512065 | 20 | 53453326 | G | A | -0.0117884 | 0.0019185 | 0.769916 | 8.00E-10 | 454823 |
| Leg fat mass (left) | rs13044335 | 20 | 47396793 | C | A | -0.0107337 | 0.00182838 | 0.255428 | 4.30E-09 | 454823 |
| Leg fat mass (left) | rs8132491 | 21 | 40288577 | A | G | -0.0113743 | 0.00175657 | 0.31299 | 9.50E-11 | 454823 |
| Leg fat mass (left) | rs372519 | 21 | 46574554 | A | G | 0.0138863 | 0.00159745 | 0.536404 | 3.50E-18 | 454823 |
| Leg fat mass (left) | rs140733155 | 21 | 48048773 | G | A | 0.0438474 | 0.00766554 | 0.011484 | 1.10E-08 | 454823 |
| Leg fat mass (left) | rs17193211 | 21 | 38885506 | T | C | -0.0182372 | 0.00323194 | 0.066797 | 1.70E-08 | 454823 |
| Leg fat mass (left) | rs4820323 | 22 | 38599767 | G | C | -0.012853 | 0.00161171 | 0.580966 | 1.50E-15 | 454823 |
| Leg fat mass (left) | rs444102 | 22 | 18215952 | C | G | 0.0148078 | 0.00210988 | 0.170774 | 2.20E-12 | 454823 |
| Leg fat mass (left) | rs2143175 | 22 | 40603732 | G | A | -0.0105132 | 0.00167664 | 0.339445 | 3.60E-10 | 454823 |
| Leg fat mass (left) | rs9615937 | 22 | 46687681 | C | G | 0.0151731 | 0.00274791 | 0.091972 | 3.40E-08 | 454823 |

**Table S2.H Summary of the SNPs (after clumping process) associated with fat mass of right leg (per SD increase)**

| **exposure** | **SNP** | **chromosome** | **position** | **effect_allele** | **other_allele** | **beta** | **se** | **eaf** | **pval** | **samplesize** |
| --- | --- | --- | --- | --- | --- | --- | --- | --- | --- | --- |
| Leg fat mass (right) | rs1167311 | 1 | 49996959 | A | G | -0.0161234 | 0.00172819 | 0.681323 | 1.10E-20 | 454846 |
| Leg fat mass (right) | rs2568958 | 1 | 72765116 | A | G | 0.0182176 | 0.00163193 | 0.603677 | 6.20E-29 | 454846 |
| Leg fat mass (right) | rs11165643 | 1 | 96924097 | T | C | 0.0157206 | 0.00162454 | 0.590153 | 3.80E-22 | 454846 |
| Leg fat mass (right) | rs4561038 | 1 | 115327909 | C | T | -0.0145073 | 0.00258643 | 0.108246 | 2.00E-08 | 454846 |
| Leg fat mass (right) | rs10915840 | 1 | 225668524 | A | G | -0.0110524 | 0.00180238 | 0.274231 | 8.70E-10 | 454846 |
| Leg fat mass (right) | rs72634826 | 1 | 1601052 | A | G | -0.01495 | 0.00184907 | 0.25988 | 6.20E-16 | 454846 |
| Leg fat mass (right) | rs11208779 | 1 | 66417145 | C | G | 0.0118647 | 0.00160549 | 0.528886 | 1.50E-13 | 454846 |
| Leg fat mass (right) | rs197374 | 1 | 112289983 | T | C | 0.0102001 | 0.0016462 | 0.380655 | 5.80E-10 | 454846 |
| Leg fat mass (right) | rs12724928 | 1 | 113128931 | C | T | -0.0133446 | 0.00198006 | 0.20487 | 1.60E-11 | 454846 |
| Leg fat mass (right) | rs115584674 | 1 | 150346106 | G | A | -0.020672 | 0.00339714 | 0.058666 | 1.20E-09 | 454846 |
| Leg fat mass (right) | rs543874 | 1 | 177889480 | G | A | 0.0350469 | 0.00197953 | 0.205274 | 3.90E-70 | 454846 |
| Leg fat mass (right) | rs76702514 | 1 | 195148296 | G | C | -0.0118689 | 0.00197286 | 0.210646 | 1.80E-09 | 454846 |
| Leg fat mass (right) | rs2678204 | 1 | 201800511 | G | T | 0.01779 | 0.00168803 | 0.340179 | 5.70E-26 | 454846 |
| Leg fat mass (right) | rs7537581 | 1 | 2725475 | A | C | 0.0111375 | 0.00161453 | 0.531726 | 5.30E-12 | 454846 |
| Leg fat mass (right) | rs3737992 | 1 | 33234128 | A | G | -0.0165982 | 0.00213216 | 0.168984 | 7.00E-15 | 454846 |
| Leg fat mass (right) | rs61828088 | 1 | 174768522 | A | G | 0.0159154 | 0.00255077 | 0.110449 | 4.40E-10 | 454846 |
| Leg fat mass (right) | rs383701 | 1 | 243842288 | A | G | -0.0132362 | 0.00237244 | 0.868883 | 2.40E-08 | 454846 |
| Leg fat mass (right) | rs10779795 | 1 | 6677064 | G | A | -0.0121352 | 0.00169316 | 0.337947 | 7.70E-13 | 454846 |
| Leg fat mass (right) | rs12031634 | 1 | 34584393 | A | G | -0.0107486 | 0.00175802 | 0.296481 | 9.70E-10 | 454846 |
| Leg fat mass (right) | rs12140153 | 1 | 62579891 | T | G | -0.0270935 | 0.00280473 | 0.094283 | 4.50E-22 | 454846 |
| Leg fat mass (right) | rs3845344 | 1 | 75001480 | T | C | 0.0103092 | 0.00163803 | 0.391168 | 3.10E-10 | 454846 |
| Leg fat mass (right) | rs6688826 | 1 | 80812329 | C | T | 0.0113221 | 0.00174533 | 0.298187 | 8.80E-11 | 454846 |
| Leg fat mass (right) | rs12072739 | 1 | 98315893 | G | A | 0.013479 | 0.00191922 | 0.224589 | 2.20E-12 | 454846 |
| Leg fat mass (right) | rs79518326 | 1 | 174946883 | A | C | -0.0359771 | 0.00485052 | 0.028644 | 1.20E-13 | 454846 |
| Leg fat mass (right) | rs1377184 | 1 | 215246432 | T | A | 0.0102199 | 0.00185162 | 0.748949 | 3.40E-08 | 454846 |
| Leg fat mass (right) | rs12025220 | 1 | 219634380 | A | G | -0.0132794 | 0.00162508 | 0.590325 | 3.00E-16 | 454846 |
| Leg fat mass (right) | rs12042959 | 1 | 243533273 | G | A | -0.0138505 | 0.00228994 | 0.143929 | 1.50E-09 | 454846 |
| Leg fat mass (right) | rs10799778 | 1 | 23313353 | G | T | -0.0149643 | 0.00214811 | 0.833685 | 3.30E-12 | 454846 |
| Leg fat mass (right) | rs3766823 | 1 | 32197257 | A | G | 0.0161755 | 0.00211956 | 0.172011 | 2.30E-14 | 454846 |
| Leg fat mass (right) | rs12144626 | 1 | 47670525 | C | T | -0.0121907 | 0.00162508 | 0.582795 | 6.30E-14 | 454846 |
| Leg fat mass (right) | rs34517439 | 1 | 78450517 | A | C | 0.0333832 | 0.00247484 | 0.121687 | 1.80E-41 | 454846 |
| Leg fat mass (right) | rs17024393 | 1 | 110154688 | C | T | 0.0500708 | 0.00504928 | 0.025904 | 3.50E-23 | 454846 |
| Leg fat mass (right) | rs61813324 | 1 | 156049877 | T | C | 0.0187548 | 0.00236871 | 0.135704 | 2.40E-15 | 454846 |
| Leg fat mass (right) | rs1778830 | 1 | 156489974 | A | G | 0.0107866 | 0.00166747 | 0.362122 | 9.90E-11 | 454846 |
| Leg fat mass (right) | rs815163 | 1 | 190294726 | C | T | -0.0113892 | 0.00161067 | 0.563221 | 1.50E-12 | 454846 |
| Leg fat mass (right) | rs6744646 | 2 | 628504 | G | A | 0.0387654 | 0.0021185 | 0.828314 | 8.50E-75 | 454846 |
| Leg fat mass (right) | rs59086897 | 2 | 25145173 | A | T | 0.0210347 | 0.00159771 | 0.487584 | 1.40E-39 | 454846 |
| Leg fat mass (right) | rs113019802 | 2 | 46884824 | A | G | -0.0123223 | 0.00192244 | 0.225061 | 1.50E-10 | 454846 |
| Leg fat mass (right) | rs10187101 | 2 | 50742227 | T | C | -0.0116027 | 0.00166143 | 0.363617 | 2.90E-12 | 454846 |
| Leg fat mass (right) | rs1861410 | 2 | 58933591 | T | C | -0.0155554 | 0.00161349 | 0.555372 | 5.40E-22 | 454846 |
| Leg fat mass (right) | rs1446585 | 2 | 136407479 | G | A | -0.0123611 | 0.00182273 | 0.244611 | 1.20E-11 | 454846 |
| Leg fat mass (right) | rs17814208 | 2 | 144037998 | G | A | 0.0107573 | 0.00186496 | 0.243887 | 8.00E-09 | 454846 |
| Leg fat mass (right) | rs77149883 | 2 | 145879854 | A | G | 0.019891 | 0.00346602 | 0.059904 | 9.50E-09 | 454846 |
| Leg fat mass (right) | rs429343 | 2 | 147903382 | G | A | -0.0126006 | 0.00162012 | 0.576558 | 7.40E-15 | 454846 |
| Leg fat mass (right) | rs10209821 | 2 | 228980358 | T | C | 0.0144501 | 0.0016825 | 0.342614 | 8.80E-18 | 454846 |
| Leg fat mass (right) | rs62107261 | 2 | 422144 | C | T | -0.0625101 | 0.00373835 | 0.048319 | 9.20E-63 | 454846 |
| Leg fat mass (right) | rs1405261 | 2 | 6143991 | A | T | -0.0088861 | 0.00161618 | 0.434369 | 3.80E-08 | 454846 |
| Leg fat mass (right) | rs12475388 | 2 | 27039792 | A | G | -0.0103537 | 0.00160757 | 0.485709 | 1.20E-10 | 454846 |
| Leg fat mass (right) | rs13410783 | 2 | 36789166 | G | A | 0.01329 | 0.00165646 | 0.369544 | 1.00E-15 | 454846 |
| Leg fat mass (right) | rs2861685 | 2 | 67837553 | C | T | -0.01263 | 0.00162036 | 0.412117 | 6.50E-15 | 454846 |
| Leg fat mass (right) | rs396354 | 2 | 86850022 | C | T | -0.011423 | 0.00177669 | 0.715647 | 1.30E-10 | 454846 |
| Leg fat mass (right) | rs13033310 | 2 | 133523605 | A | G | 0.01056 | 0.00185133 | 0.252784 | 1.20E-08 | 454846 |
| Leg fat mass (right) | rs72866851 | 2 | 154842750 | T | A | 0.0147961 | 0.00263785 | 0.102235 | 2.00E-08 | 454846 |
| Leg fat mass (right) | rs2216931 | 2 | 181599070 | A | C | 0.0144815 | 0.00169204 | 0.661957 | 1.10E-17 | 454846 |
| Leg fat mass (right) | rs284532 | 2 | 217332057 | G | T | -0.00885421 | 0.00160141 | 0.5229 | 3.20E-08 | 454846 |
| Leg fat mass (right) | rs6715925 | 2 | 41511160 | G | T | -0.00887665 | 0.00162617 | 0.460944 | 4.80E-08 | 454846 |
| Leg fat mass (right) | rs62182430 | 2 | 172772837 | A | G | 0.00979516 | 0.00179276 | 0.27265 | 4.70E-08 | 454846 |
| Leg fat mass (right) | rs34234296 | 2 | 175166636 | A | G | -0.0124425 | 0.00165465 | 0.392481 | 5.50E-14 | 454846 |
| Leg fat mass (right) | rs72913721 | 2 | 193859247 | G | A | -0.0134964 | 0.0019064 | 0.228247 | 1.40E-12 | 454846 |
| Leg fat mass (right) | rs73985439 | 2 | 212299249 | C | A | 0.0110651 | 0.00173588 | 0.307311 | 1.80E-10 | 454846 |
| Leg fat mass (right) | rs2433733 | 2 | 230816703 | A | G | -0.0149241 | 0.00171086 | 0.677734 | 2.70E-18 | 454846 |
| Leg fat mass (right) | rs7575523 | 2 | 59335104 | G | T | -0.0172382 | 0.00163956 | 0.603242 | 7.50E-26 | 454846 |
| Leg fat mass (right) | rs4672338 | 2 | 60217457 | T | C | 0.00968838 | 0.00169273 | 0.336285 | 1.00E-08 | 454846 |
| Leg fat mass (right) | rs11691869 | 2 | 100805996 | A | C | -0.0164972 | 0.00166743 | 0.361918 | 4.40E-23 | 454846 |
| Leg fat mass (right) | rs55685371 | 2 | 203862724 | A | T | 0.0101065 | 0.00160624 | 0.553495 | 3.10E-10 | 454846 |
| Leg fat mass (right) | rs4482463 | 2 | 205375909 | A | C | -0.0246105 | 0.00300754 | 0.923053 | 2.80E-16 | 454846 |
| Leg fat mass (right) | rs1263629 | 2 | 207936911 | G | A | 0.0141151 | 0.00229065 | 0.143743 | 7.20E-10 | 454846 |
| Leg fat mass (right) | rs13427822 | 2 | 213414265 | G | A | -0.0132477 | 0.00181808 | 0.271196 | 3.20E-13 | 454846 |
| Leg fat mass (right) | rs11677279 | 2 | 37021090 | C | G | 0.00959045 | 0.00167919 | 0.65354 | 1.10E-08 | 454846 |
| Leg fat mass (right) | rs13389219 | 2 | 165528876 | T | C | 0.0119183 | 0.00163515 | 0.392425 | 3.10E-13 | 454846 |
| Leg fat mass (right) | rs12477385 | 2 | 166144850 | T | G | -0.0131977 | 0.00191769 | 0.225538 | 5.90E-12 | 454846 |
| Leg fat mass (right) | rs7568228 | 2 | 236848488 | C | G | -0.00900264 | 0.00160028 | 0.527097 | 1.80E-08 | 454846 |
| Leg fat mass (right) | rs3774063 | 3 | 9511736 | T | C | 0.0163742 | 0.00264191 | 0.102123 | 5.70E-10 | 454846 |
| Leg fat mass (right) | rs1554654 | 3 | 44044344 | T | C | -0.0124628 | 0.00160636 | 0.470554 | 8.60E-15 | 454846 |
| Leg fat mass (right) | rs75557510 | 3 | 84321469 | G | A | -0.0237703 | 0.00339045 | 0.060857 | 2.40E-12 | 454846 |
| Leg fat mass (right) | rs9835574 | 3 | 131623019 | C | A | 0.0173518 | 0.0017907 | 0.277143 | 3.30E-22 | 454846 |
| Leg fat mass (right) | rs1964675 | 3 | 136114945 | T | C | 0.0122065 | 0.00176801 | 0.711092 | 5.10E-12 | 454846 |
| Leg fat mass (right) | rs529200 | 3 | 173114305 | G | A | 0.0130666 | 0.00160411 | 0.527773 | 3.80E-16 | 454846 |
| Leg fat mass (right) | rs34801745 | 3 | 196115497 | C | G | 0.0113393 | 0.00166766 | 0.358078 | 1.00E-11 | 454846 |
| Leg fat mass (right) | rs28350 | 3 | 42418446 | G | A | -0.014925 | 0.00209348 | 0.820613 | 1.00E-12 | 454846 |
| Leg fat mass (right) | rs9843653 | 3 | 49920571 | C | T | 0.0216047 | 0.00160139 | 0.511536 | 1.80E-41 | 454846 |
| Leg fat mass (right) | rs9866090 | 3 | 71585144 | A | G | 0.0111655 | 0.001911 | 0.228546 | 5.10E-09 | 454846 |
| Leg fat mass (right) | rs1436348 | 3 | 104612668 | G | A | 0.0130194 | 0.00162275 | 0.582733 | 1.00E-15 | 454846 |
| Leg fat mass (right) | rs13099083 | 3 | 107990877 | T | A | 0.0103587 | 0.00162012 | 0.581918 | 1.60E-10 | 454846 |
| Leg fat mass (right) | rs1568488 | 3 | 153657951 | C | G | 0.0134703 | 0.00164328 | 0.594858 | 2.50E-16 | 454846 |
| Leg fat mass (right) | rs2291127 | 3 | 138122477 | T | C | -0.0134198 | 0.00220338 | 0.156213 | 1.10E-09 | 454846 |
| Leg fat mass (right) | rs9289630 | 3 | 141178670 | C | G | 0.0155254 | 0.00164708 | 0.389114 | 4.30E-21 | 454846 |
| Leg fat mass (right) | rs6444950 | 3 | 170602073 | A | G | 0.0123444 | 0.00188089 | 0.237553 | 5.30E-11 | 454846 |
| Leg fat mass (right) | rs73052033 | 3 | 185828465 | C | T | -0.0184023 | 0.00206397 | 0.185072 | 4.80E-19 | 454846 |
| Leg fat mass (right) | rs361222 | 3 | 12922716 | T | A | -0.00920068 | 0.00166689 | 0.632511 | 3.40E-08 | 454846 |
| Leg fat mass (right) | rs7619139 | 3 | 25110415 | A | T | 0.0099654 | 0.00163012 | 0.588641 | 9.80E-10 | 454846 |
| Leg fat mass (right) | rs13097918 | 3 | 35676330 | A | T | 0.0121774 | 0.00195923 | 0.212284 | 5.10E-10 | 454846 |
| Leg fat mass (right) | rs754635 | 3 | 42305131 | G | C | 0.0166213 | 0.00252089 | 0.886582 | 4.30E-11 | 454846 |
| Leg fat mass (right) | rs17668356 | 3 | 61208619 | G | C | -0.0186745 | 0.00226469 | 0.145996 | 1.60E-16 | 454846 |
| Leg fat mass (right) | rs9968060 | 3 | 62471282 | T | C | 0.0105859 | 0.00170069 | 0.64261 | 4.80E-10 | 454846 |
| Leg fat mass (right) | rs1454687 | 3 | 94038085 | G | C | -0.0155592 | 0.00160028 | 0.515341 | 2.40E-22 | 454846 |
| Leg fat mass (right) | rs2606227 | 3 | 183536836 | C | T | -0.0102287 | 0.00167482 | 0.631391 | 1.00E-09 | 454846 |
| Leg fat mass (right) | rs1801282 | 3 | 12393125 | G | C | 0.0241218 | 0.00246057 | 0.119536 | 1.10E-22 | 454846 |
| Leg fat mass (right) | rs11914525 | 3 | 85880768 | G | A | -0.0157087 | 0.00167349 | 0.354243 | 6.20E-21 | 454846 |
| Leg fat mass (right) | rs9839081 | 3 | 123051230 | A | G | -0.0117835 | 0.00173556 | 0.325085 | 1.10E-11 | 454846 |
| Leg fat mass (right) | rs73213484 | 4 | 28489339 | T | A | -0.0185781 | 0.00229995 | 0.141227 | 6.60E-16 | 454846 |
| Leg fat mass (right) | rs4088476 | 4 | 34911685 | T | C | 0.00984166 | 0.00168982 | 0.660786 | 5.70E-09 | 454846 |
| Leg fat mass (right) | rs3113509 | 4 | 52932825 | T | C | -0.0127426 | 0.00180886 | 0.731974 | 1.90E-12 | 454846 |
| Leg fat mass (right) | rs13107325 | 4 | 103188709 | T | C | 0.0291604 | 0.00304555 | 0.074861 | 1.00E-21 | 454846 |
| Leg fat mass (right) | rs11099020 | 4 | 130724902 | T | C | -0.0111569 | 0.00167193 | 0.640527 | 2.50E-11 | 454846 |
| Leg fat mass (right) | rs7683836 | 4 | 180167906 | A | G | -0.00937886 | 0.00161717 | 0.557257 | 6.60E-09 | 454846 |
| Leg fat mass (right) | rs2051559 | 4 | 3298800 | C | T | 0.0144477 | 0.00236659 | 0.132569 | 1.00E-09 | 454846 |
| Leg fat mass (right) | rs34811474 | 4 | 25408838 | A | G | -0.0171751 | 0.00189935 | 0.230827 | 1.50E-19 | 454846 |
| Leg fat mass (right) | rs6815910 | 4 | 55495793 | A | T | -0.00961121 | 0.00161044 | 0.555705 | 2.40E-09 | 454846 |
| Leg fat mass (right) | rs9917946 | 4 | 65651232 | G | T | -0.0108288 | 0.0016353 | 0.405055 | 3.50E-11 | 454846 |
| Leg fat mass (right) | rs1229984 | 4 | 100239319 | C | T | 0.0349496 | 0.0048603 | 0.972779 | 6.40E-13 | 454846 |
| Leg fat mass (right) | rs530255 | 4 | 171041408 | C | T | 0.00901075 | 0.00162925 | 0.41111 | 3.20E-08 | 454846 |
| Leg fat mass (right) | rs1383723 | 4 | 67803507 | T | A | -0.0112785 | 0.00194771 | 0.783145 | 7.00E-09 | 454846 |
| Leg fat mass (right) | rs6847975 | 4 | 80812960 | A | G | 0.0103898 | 0.00167892 | 0.356165 | 6.10E-10 | 454846 |
| Leg fat mass (right) | rs4240326 | 4 | 145839264 | G | A | -0.0120587 | 0.00160926 | 0.550141 | 6.70E-14 | 454846 |
| Leg fat mass (right) | rs10938397 | 4 | 45182527 | G | A | 0.0226905 | 0.00161716 | 0.434305 | 1.00E-44 | 454846 |
| Leg fat mass (right) | rs4419475 | 4 | 96150044 | T | A | 0.0104749 | 0.0016302 | 0.407327 | 1.30E-10 | 454846 |
| Leg fat mass (right) | rs1296328 | 4 | 137083193 | C | A | -0.0143443 | 0.00162094 | 0.558991 | 8.80E-19 | 454846 |
| Leg fat mass (right) | rs113079574 | 4 | 147354089 | T | C | -0.0126611 | 0.00204038 | 0.192748 | 5.50E-10 | 454846 |
| Leg fat mass (right) | rs148636479 | 4 | 164359678 | T | A | -0.0313975 | 0.00512718 | 0.028543 | 9.10E-10 | 454846 |
| Leg fat mass (right) | rs11135450 | 5 | 95554016 | G | A | 0.0117852 | 0.00170899 | 0.668898 | 5.30E-12 | 454846 |
| Leg fat mass (right) | rs78081111 | 5 | 119383328 | C | T | -0.00947937 | 0.00160921 | 0.542723 | 3.80E-09 | 454846 |
| Leg fat mass (right) | rs2133561 | 5 | 139086651 | T | A | -0.0120032 | 0.00166043 | 0.611104 | 4.90E-13 | 454846 |
| Leg fat mass (right) | rs4958702 | 5 | 153544512 | C | T | -0.0118487 | 0.00161778 | 0.572318 | 2.40E-13 | 454846 |
| Leg fat mass (right) | rs61023343 | 5 | 63966957 | C | A | 0.0100799 | 0.0016738 | 0.637843 | 1.70E-09 | 454846 |
| Leg fat mass (right) | rs1477290 | 5 | 87988934 | C | T | 0.0267148 | 0.00235032 | 0.136904 | 6.10E-30 | 454846 |
| Leg fat mass (right) | rs6594682 | 5 | 112444220 | T | C | 0.0112833 | 0.00162687 | 0.422196 | 4.00E-12 | 454846 |
| Leg fat mass (right) | rs6861649 | 5 | 50864788 | C | T | 0.0112089 | 0.00164456 | 0.607053 | 9.40E-12 | 454846 |
| Leg fat mass (right) | rs252749 | 5 | 77389973 | A | G | -0.0129997 | 0.00185716 | 0.245965 | 2.60E-12 | 454846 |
| Leg fat mass (right) | rs7442885 | 5 | 87682877 | G | C | -0.0199161 | 0.00195574 | 0.214125 | 2.40E-24 | 454846 |
| Leg fat mass (right) | rs396755 | 5 | 104022239 | G | C | -0.0100914 | 0.00162095 | 0.571074 | 4.80E-10 | 454846 |
| Leg fat mass (right) | rs40071 | 5 | 107496102 | C | T | -0.0177914 | 0.00209333 | 0.179492 | 1.90E-17 | 454846 |
| Leg fat mass (right) | rs2964023 | 5 | 153246412 | C | T | -0.0116183 | 0.00173694 | 0.692007 | 2.20E-11 | 454846 |
| Leg fat mass (right) | rs17056301 | 5 | 158271680 | C | T | 0.0101166 | 0.00184017 | 0.256499 | 3.80E-08 | 454846 |
| Leg fat mass (right) | rs10516044 | 5 | 167604236 | C | G | 0.0143253 | 0.002514 | 0.115987 | 1.20E-08 | 454846 |
| Leg fat mass (right) | rs72739240 | 5 | 27175584 | T | C | -0.0100475 | 0.00177977 | 0.282673 | 1.60E-08 | 454846 |
| Leg fat mass (right) | rs3943933 | 5 | 63020327 | A | T | 0.0119013 | 0.00160259 | 0.480728 | 1.10E-13 | 454846 |
| Leg fat mass (right) | rs329118 | 5 | 133861663 | T | C | -0.0109101 | 0.00162479 | 0.419392 | 1.90E-11 | 454846 |
| Leg fat mass (right) | rs698147 | 5 | 3513485 | G | A | -0.0101516 | 0.00160946 | 0.543497 | 2.80E-10 | 454846 |
| Leg fat mass (right) | rs67913249 | 5 | 43204126 | G | C | -0.00994943 | 0.00169488 | 0.3418 | 4.40E-09 | 454846 |
| Leg fat mass (right) | rs2307111 | 5 | 75003678 | C | T | -0.022511 | 0.00163942 | 0.395094 | 6.60E-43 | 454846 |
| Leg fat mass (right) | rs245767 | 5 | 170525393 | G | A | 0.0137389 | 0.00180641 | 0.730364 | 2.80E-14 | 454846 |
| Leg fat mass (right) | rs10947793 | 6 | 12142817 | G | A | -0.0129681 | 0.00166628 | 0.371724 | 7.10E-15 | 454846 |
| Leg fat mass (right) | rs2744938 | 6 | 34552110 | G | A | 0.0341367 | 0.00225436 | 0.147382 | 8.50E-52 | 454846 |
| Leg fat mass (right) | rs34045288 | 6 | 40369081 | T | C | 0.0183004 | 0.00169712 | 0.334423 | 4.10E-27 | 454846 |
| Leg fat mass (right) | rs9381198 | 6 | 42554255 | C | A | 0.0102284 | 0.00172729 | 0.31239 | 3.20E-09 | 454846 |
| Leg fat mass (right) | rs10499014 | 6 | 97947755 | G | C | -0.0127102 | 0.00181735 | 0.268655 | 2.70E-12 | 454846 |
| Leg fat mass (right) | rs6938973 | 6 | 98421721 | C | T | 0.0166513 | 0.00163648 | 0.601536 | 2.60E-24 | 454846 |
| Leg fat mass (right) | rs1871329 | 6 | 124911534 | G | A | 0.0117374 | 0.00189246 | 0.236004 | 5.60E-10 | 454846 |
| Leg fat mass (right) | rs11757278 | 6 | 13180454 | C | T | -0.0108737 | 0.00174151 | 0.303903 | 4.30E-10 | 454846 |
| Leg fat mass (right) | rs28366156 | 6 | 31671498 | C | T | -0.0209253 | 0.0023746 | 0.130611 | 1.20E-18 | 454846 |
| Leg fat mass (right) | rs57989773 | 6 | 100629078 | C | T | 0.0106027 | 0.00191555 | 0.244913 | 3.10E-08 | 454846 |
| Leg fat mass (right) | rs13218383 | 6 | 120173501 | G | C | -0.0121428 | 0.00169607 | 0.335136 | 8.10E-13 | 454846 |
| Leg fat mass (right) | rs6569648 | 6 | 130349119 | T | C | -0.0146742 | 0.00187434 | 0.760868 | 4.90E-15 | 454846 |
| Leg fat mass (right) | rs1557100 | 6 | 154294018 | C | A | 0.01343 | 0.00245731 | 0.121252 | 4.60E-08 | 454846 |
| Leg fat mass (right) | rs7765393 | 6 | 33525598 | T | A | 0.0124299 | 0.00178423 | 0.27742 | 3.20E-12 | 454846 |
| Leg fat mass (right) | rs1321519 | 6 | 51769619 | G | A | 0.00979138 | 0.00168255 | 0.345315 | 5.90E-09 | 454846 |
| Leg fat mass (right) | rs208477 | 6 | 66920846 | T | C | 0.0122379 | 0.00204684 | 0.18833 | 2.20E-09 | 454846 |
| Leg fat mass (right) | rs854917 | 6 | 90127390 | T | C | -0.0103861 | 0.00182431 | 0.735792 | 1.20E-08 | 454846 |
| Leg fat mass (right) | rs765874 | 6 | 143185557 | A | T | -0.00958461 | 0.00160131 | 0.489297 | 2.20E-09 | 454846 |
| Leg fat mass (right) | rs36007635 | 6 | 163009335 | A | G | -0.0145914 | 0.00232453 | 0.137719 | 3.40E-10 | 454846 |
| Leg fat mass (right) | rs11242730 | 6 | 2030663 | T | G | 0.011515 | 0.00187916 | 0.24031 | 8.90E-10 | 454846 |
| Leg fat mass (right) | rs72892910 | 6 | 50816887 | T | G | 0.0281718 | 0.00212378 | 0.172205 | 3.70E-40 | 454846 |
| Leg fat mass (right) | rs1743767 | 6 | 70219911 | C | A | 0.0108903 | 0.00183438 | 0.743902 | 2.90E-09 | 454846 |
| Leg fat mass (right) | rs9449999 | 6 | 85371011 | G | A | -0.00906965 | 0.00163104 | 0.589167 | 2.70E-08 | 454846 |
| Leg fat mass (right) | rs57803 | 6 | 111612559 | A | G | -0.0116409 | 0.00210878 | 0.824114 | 3.40E-08 | 454846 |
| Leg fat mass (right) | rs62396185 | 6 | 26180634 | C | G | -0.0245106 | 0.00182645 | 0.260024 | 4.60E-41 | 454846 |
| Leg fat mass (right) | rs1327259 | 6 | 51177811 | G | A | -0.0103877 | 0.00164877 | 0.387653 | 3.00E-10 | 454846 |
| Leg fat mass (right) | rs9294260 | 6 | 83433228 | A | G | 0.0116542 | 0.00161138 | 0.476586 | 4.70E-13 | 454846 |
| Leg fat mass (right) | rs2802295 | 6 | 108926496 | G | A | 0.0164344 | 0.00165542 | 0.626186 | 3.20E-23 | 454846 |
| Leg fat mass (right) | rs12173616 | 6 | 141378032 | G | A | 0.0201449 | 0.00360227 | 0.052371 | 2.20E-08 | 454846 |
| Leg fat mass (right) | rs9480184 | 6 | 155987788 | T | C | 0.0119682 | 0.0019676 | 0.21076 | 1.20E-09 | 454846 |
| Leg fat mass (right) | rs1182199 | 7 | 2862542 | A | C | -0.0108973 | 0.0017422 | 0.304431 | 4.00E-10 | 454846 |
| Leg fat mass (right) | rs6461999 | 7 | 27281304 | A | C | -0.013401 | 0.00239666 | 0.870805 | 2.30E-08 | 454846 |
| Leg fat mass (right) | rs4947584 | 7 | 50572709 | T | A | 0.0110705 | 0.00168677 | 0.34777 | 5.30E-11 | 454846 |
| Leg fat mass (right) | rs58862095 | 7 | 75081418 | T | C | -0.0154815 | 0.00162795 | 0.419271 | 1.90E-21 | 454846 |
| Leg fat mass (right) | rs17149254 | 7 | 76634463 | C | T | -0.015477 | 0.00207406 | 0.804833 | 8.50E-14 | 454846 |
| Leg fat mass (right) | rs2396625 | 7 | 113028634 | A | T | -0.0143723 | 0.0016322 | 0.421326 | 1.30E-18 | 454846 |
| Leg fat mass (right) | rs10951992 | 7 | 6758938 | C | T | 0.00957244 | 0.0016351 | 0.439102 | 4.80E-09 | 454846 |
| Leg fat mass (right) | rs2289379 | 7 | 44804225 | T | C | -0.0122631 | 0.00164536 | 0.395692 | 9.10E-14 | 454846 |
| Leg fat mass (right) | rs4718964 | 7 | 70038969 | T | G | 0.0115971 | 0.00163261 | 0.413113 | 1.20E-12 | 454846 |
| Leg fat mass (right) | rs11767811 | 7 | 71620988 | A | G | -0.0141813 | 0.00207722 | 0.181437 | 8.70E-12 | 454846 |
| Leg fat mass (right) | rs28457808 | 7 | 99023246 | G | C | -0.0149952 | 0.00217393 | 0.163076 | 5.30E-12 | 454846 |
| Leg fat mass (right) | rs2470937 | 7 | 104579775 | A | T | 0.00884652 | 0.00161271 | 0.451431 | 4.10E-08 | 454846 |
| Leg fat mass (right) | rs4307239 | 7 | 24354300 | G | A | 0.00885812 | 0.00161165 | 0.458845 | 3.90E-08 | 454846 |
| Leg fat mass (right) | rs2072413 | 7 | 150647969 | T | C | -0.0109686 | 0.00181266 | 0.270985 | 1.40E-09 | 454846 |
| Leg fat mass (right) | rs35589149 | 7 | 6426273 | C | G | 0.0149418 | 0.00236615 | 0.132436 | 2.70E-10 | 454846 |
| Leg fat mass (right) | rs2283093 | 7 | 126721231 | T | C | 0.0109394 | 0.00199201 | 0.202917 | 4.00E-08 | 454846 |
| Leg fat mass (right) | rs215634 | 7 | 32369148 | G | A | -0.0136654 | 0.00165007 | 0.611918 | 1.20E-16 | 454846 |
| Leg fat mass (right) | rs1899689 | 7 | 121964349 | T | C | 0.0119788 | 0.00164239 | 0.389581 | 3.00E-13 | 454846 |
| Leg fat mass (right) | rs117176448 | 8 | 27261138 | G | C | 0.019489 | 0.00271595 | 0.096166 | 7.20E-13 | 454846 |
| Leg fat mass (right) | rs12541408 | 8 | 95585807 | C | T | -0.0107257 | 0.00172381 | 0.317488 | 4.90E-10 | 454846 |
| Leg fat mass (right) | rs11778934 | 8 | 116551405 | G | C | -0.0106198 | 0.00161227 | 0.536211 | 4.50E-11 | 454846 |
| Leg fat mass (right) | rs7828631 | 8 | 132875320 | T | C | 0.0141459 | 0.00256648 | 0.109933 | 3.60E-08 | 454846 |
| Leg fat mass (right) | rs4266606 | 8 | 28043673 | T | C | -0.0128564 | 0.0023143 | 0.857418 | 2.80E-08 | 454846 |
| Leg fat mass (right) | rs1106761 | 8 | 142619234 | A | G | 0.0122683 | 0.00166876 | 0.384029 | 2.00E-13 | 454846 |
| Leg fat mass (right) | rs10099330 | 8 | 143383694 | G | A | 0.00985108 | 0.00161197 | 0.452932 | 9.90E-10 | 454846 |
| Leg fat mass (right) | rs12679106 | 8 | 73443198 | T | G | -0.0185779 | 0.00177299 | 0.709174 | 1.10E-25 | 454846 |
| Leg fat mass (right) | rs2920939 | 8 | 93182601 | A | G | 0.00926705 | 0.0016396 | 0.606685 | 1.60E-08 | 454846 |
| Leg fat mass (right) | rs35792595 | 8 | 14318616 | A | T | 0.0115451 | 0.00176235 | 0.297367 | 5.70E-11 | 454846 |
| Leg fat mass (right) | rs13264909 | 8 | 64702385 | T | A | -0.00906534 | 0.00162218 | 0.428919 | 2.30E-08 | 454846 |
| Leg fat mass (right) | rs10100245 | 8 | 77226919 | A | G | 0.0151851 | 0.001618 | 0.564472 | 6.30E-21 | 454846 |
| Leg fat mass (right) | rs7460093 | 8 | 144876159 | A | G | 0.00895191 | 0.00161985 | 0.531136 | 3.30E-08 | 454846 |
| Leg fat mass (right) | rs11250094 | 8 | 10802001 | C | G | -0.0120472 | 0.00161457 | 0.548075 | 8.60E-14 | 454846 |
| Leg fat mass (right) | rs11779446 | 8 | 23388326 | G | A | -0.0164722 | 0.00218663 | 0.161287 | 5.00E-14 | 454846 |
| Leg fat mass (right) | rs66954327 | 8 | 59825133 | G | A | 0.0103128 | 0.00170672 | 0.333258 | 1.50E-09 | 454846 |
| Leg fat mass (right) | rs1871745 | 8 | 106457633 | G | A | 0.0111877 | 0.00199267 | 0.203565 | 2.00E-08 | 454846 |
| Leg fat mass (right) | rs4876611 | 8 | 116671848 | G | A | 0.0171243 | 0.00178677 | 0.720188 | 9.30E-22 | 454846 |
| Leg fat mass (right) | rs2954021 | 8 | 126482077 | G | A | 0.0115224 | 0.00160274 | 0.504593 | 6.50E-13 | 454846 |
| Leg fat mass (right) | rs10448179 | 9 | 11836310 | T | C | -0.00971447 | 0.00169512 | 0.336658 | 1.00E-08 | 454846 |
| Leg fat mass (right) | rs13292699 | 9 | 15910044 | C | A | -0.0181144 | 0.00162014 | 0.43373 | 5.10E-29 | 454846 |
| Leg fat mass (right) | rs10820852 | 9 | 94186973 | A | C | -0.0112524 | 0.00179481 | 0.276314 | 3.60E-10 | 454846 |
| Leg fat mass (right) | rs10992854 | 9 | 96437565 | C | T | -0.0119859 | 0.00172844 | 0.681935 | 4.10E-12 | 454846 |
| Leg fat mass (right) | rs1475535 | 9 | 92212610 | A | T | 0.010806 | 0.0016084 | 0.498072 | 1.80E-11 | 454846 |
| Leg fat mass (right) | rs1360201 | 9 | 73796450 | T | C | 0.00951355 | 0.00160319 | 0.481629 | 3.00E-09 | 454846 |
| Leg fat mass (right) | rs10760277 | 9 | 126093999 | T | C | 0.0106732 | 0.00165256 | 0.385095 | 1.10E-10 | 454846 |
| Leg fat mass (right) | rs1412239 | 9 | 28425515 | G | C | 0.0181904 | 0.00171146 | 0.323115 | 2.20E-26 | 454846 |
| Leg fat mass (right) | rs16916303 | 9 | 30823761 | G | A | -0.0150357 | 0.00249596 | 0.119777 | 1.70E-09 | 454846 |
| Leg fat mass (right) | rs7034554 | 9 | 37081301 | G | A | -0.00994114 | 0.00165554 | 0.373726 | 1.90E-09 | 454846 |
| Leg fat mass (right) | rs10989067 | 9 | 103119634 | A | G | 0.0134215 | 0.00172175 | 0.315884 | 6.40E-15 | 454846 |
| Leg fat mass (right) | rs7038943 | 9 | 120377178 | C | T | -0.0106012 | 0.00169123 | 0.338796 | 3.60E-10 | 454846 |
| Leg fat mass (right) | rs7027304 | 9 | 129408290 | T | C | 0.0124658 | 0.00169169 | 0.652645 | 1.70E-13 | 454846 |
| Leg fat mass (right) | rs10756798 | 9 | 16739763 | T | C | -0.0122476 | 0.00167255 | 0.642458 | 2.40E-13 | 454846 |
| Leg fat mass (right) | rs1330199 | 9 | 27760946 | T | G | -0.0094092 | 0.00161037 | 0.48314 | 5.10E-09 | 454846 |
| Leg fat mass (right) | rs1619442 | 9 | 81348300 | C | T | -0.0135799 | 0.00230466 | 0.859488 | 3.80E-09 | 454846 |
| Leg fat mass (right) | rs56203622 | 9 | 131040874 | C | T | 0.0149275 | 0.00227126 | 0.145542 | 5.00E-11 | 454846 |
| Leg fat mass (right) | rs71495038 | 10 | 33971383 | A | G | 0.0207023 | 0.00300748 | 0.076946 | 5.80E-12 | 454846 |
| Leg fat mass (right) | rs11001963 | 10 | 78760959 | T | C | 0.0103901 | 0.00163703 | 0.581316 | 2.20E-10 | 454846 |
| Leg fat mass (right) | rs10887578 | 10 | 88096047 | C | G | 0.0111876 | 0.00161245 | 0.497531 | 4.00E-12 | 454846 |
| Leg fat mass (right) | rs7097348 | 10 | 53663315 | T | C | 0.0103481 | 0.00178343 | 0.716779 | 6.50E-09 | 454846 |
| Leg fat mass (right) | rs11245344 | 10 | 126418782 | T | C | 0.00961549 | 0.00162237 | 0.571123 | 3.10E-09 | 454846 |
| Leg fat mass (right) | rs7893571 | 10 | 16750129 | T | G | 0.0118443 | 0.00170349 | 0.665922 | 3.60E-12 | 454846 |
| Leg fat mass (right) | rs11012732 | 10 | 21830104 | G | A | 0.0188549 | 0.00170311 | 0.331713 | 1.70E-28 | 454846 |
| Leg fat mass (right) | rs7916385 | 10 | 102470432 | T | C | -0.0175578 | 0.00243913 | 0.150255 | 6.10E-13 | 454846 |
| Leg fat mass (right) | rs9421249 | 10 | 118623322 | T | C | 0.0155107 | 0.00182832 | 0.260991 | 2.20E-17 | 454846 |
| Leg fat mass (right) | rs577525 | 10 | 99769388 | C | T | 0.0149427 | 0.0016157 | 0.562069 | 2.30E-20 | 454846 |
| Leg fat mass (right) | rs4290163 | 10 | 104610926 | T | G | 0.0107673 | 0.00164237 | 0.392694 | 5.50E-11 | 454846 |
| Leg fat mass (right) | rs2172131 | 10 | 133978962 | C | T | -0.0124904 | 0.00162441 | 0.578564 | 1.50E-14 | 454846 |
| Leg fat mass (right) | rs4881171 | 10 | 3492888 | A | G | -0.0146985 | 0.00267945 | 0.099829 | 4.10E-08 | 454846 |
| Leg fat mass (right) | rs7070670 | 10 | 61842645 | T | C | -0.0098796 | 0.0017178 | 0.327987 | 8.90E-09 | 454846 |
| Leg fat mass (right) | rs1889490 | 10 | 72357713 | T | C | 0.0097602 | 0.00164253 | 0.401753 | 2.80E-09 | 454846 |
| Leg fat mass (right) | rs12254441 | 10 | 76617857 | T | C | -0.0104991 | 0.00171647 | 0.373196 | 9.60E-10 | 454846 |
| Leg fat mass (right) | rs17399739 | 10 | 87490850 | G | A | 0.0208861 | 0.00316892 | 0.068919 | 4.40E-11 | 454846 |
| Leg fat mass (right) | rs35519679 | 10 | 114818754 | A | G | -0.0110644 | 0.00186475 | 0.252804 | 3.00E-09 | 454846 |
| Leg fat mass (right) | rs67609008 | 10 | 126640936 | C | T | 0.0128396 | 0.00178505 | 0.283589 | 6.30E-13 | 454846 |
| Leg fat mass (right) | rs7124681 | 11 | 47529947 | A | C | 0.0169471 | 0.00162682 | 0.408395 | 2.10E-25 | 454846 |
| Leg fat mass (right) | rs494048 | 11 | 118961231 | C | T | 0.0100749 | 0.00163692 | 0.53758 | 7.50E-10 | 454846 |
| Leg fat mass (right) | rs4936175 | 11 | 132641959 | C | T | 0.0098123 | 0.00161299 | 0.442741 | 1.20E-09 | 454846 |
| Leg fat mass (right) | rs2156675 | 11 | 133707509 | A | G | 0.0118398 | 0.00192144 | 0.770178 | 7.20E-10 | 454846 |
| Leg fat mass (right) | rs111258054 | 11 | 134611390 | T | C | 0.0135708 | 0.00209829 | 0.183625 | 1.00E-10 | 454846 |
| Leg fat mass (right) | rs28711392 | 11 | 13349559 | C | T | -0.0125641 | 0.00167607 | 0.367364 | 6.60E-14 | 454846 |
| Leg fat mass (right) | rs10160769 | 11 | 76474827 | C | G | -0.011011 | 0.00196385 | 0.217489 | 2.10E-08 | 454846 |
| Leg fat mass (right) | rs61903695 | 11 | 89922417 | G | A | 0.0116224 | 0.00184173 | 0.254895 | 2.80E-10 | 454846 |
| Leg fat mass (right) | rs1502317 | 11 | 8682018 | T | C | -0.0151638 | 0.00179514 | 0.276546 | 3.00E-17 | 454846 |
| Leg fat mass (right) | rs111909661 | 11 | 27468595 | C | G | 0.0118353 | 0.00195732 | 0.215437 | 1.50E-09 | 454846 |
| Leg fat mass (right) | rs9783304 | 11 | 43660255 | T | G | -0.0183635 | 0.00173283 | 0.689277 | 3.10E-26 | 454846 |
| Leg fat mass (right) | rs35184536 | 11 | 116778813 | G | A | 0.0220661 | 0.00337637 | 0.06007 | 6.30E-11 | 454846 |
| Leg fat mass (right) | rs1945391 | 11 | 122520291 | T | A | 0.00924589 | 0.00164562 | 0.388107 | 1.90E-08 | 454846 |
| Leg fat mass (right) | rs10766451 | 11 | 2917510 | T | C | 0.0103551 | 0.00172601 | 0.324039 | 2.00E-09 | 454846 |
| Leg fat mass (right) | rs1782508 | 11 | 30243795 | G | C | -0.012401 | 0.0016844 | 0.655503 | 1.80E-13 | 454846 |
| Leg fat mass (right) | rs2846139 | 11 | 65309983 | T | C | 0.0158154 | 0.00194722 | 0.217367 | 4.60E-16 | 454846 |
| Leg fat mass (right) | rs11603984 | 11 | 85238368 | T | G | -0.0145262 | 0.00234737 | 0.135116 | 6.10E-10 | 454846 |
| Leg fat mass (right) | rs719802 | 11 | 113234679 | C | T | -0.0121518 | 0.00164528 | 0.61441 | 1.50E-13 | 454846 |
| Leg fat mass (right) | rs12286929 | 11 | 115022404 | G | A | 0.00938206 | 0.00160765 | 0.526944 | 5.40E-09 | 454846 |
| Leg fat mass (right) | rs6265 | 11 | 27679916 | T | C | -0.0280758 | 0.00204858 | 0.188491 | 9.50E-43 | 454846 |
| Leg fat mass (right) | rs55707359 | 11 | 46159333 | G | T | 0.0400553 | 0.00658334 | 0.015449 | 1.20E-09 | 454846 |
| Leg fat mass (right) | rs801738 | 11 | 65924217 | G | C | -0.0156656 | 0.00167238 | 0.357537 | 7.40E-21 | 454846 |
| Leg fat mass (right) | rs7944782 | 11 | 130795698 | G | T | 0.0118023 | 0.00161115 | 0.509786 | 2.40E-13 | 454846 |
| Leg fat mass (right) | rs7132908 | 12 | 50263148 | A | G | 0.0229676 | 0.00164858 | 0.384444 | 4.10E-44 | 454846 |
| Leg fat mass (right) | rs7967402 | 12 | 60962321 | G | A | 0.0123298 | 0.00212367 | 0.172897 | 6.40E-09 | 454846 |
| Leg fat mass (right) | rs10505836 | 12 | 19288508 | C | A | 0.0150928 | 0.00232698 | 0.859998 | 8.80E-11 | 454846 |
| Leg fat mass (right) | rs1458156 | 12 | 41887940 | T | C | 0.0127258 | 0.00160455 | 0.488482 | 2.20E-15 | 454846 |
| Leg fat mass (right) | rs3730071 | 12 | 49168798 | A | C | -0.0263795 | 0.00468151 | 0.030238 | 1.80E-08 | 454846 |
| Leg fat mass (right) | rs61754230 | 12 | 72179446 | T | C | 0.034364 | 0.00576291 | 0.01971 | 2.50E-09 | 454846 |
| Leg fat mass (right) | rs11066028 | 12 | 112245170 | C | A | 0.0100134 | 0.00179649 | 0.276178 | 2.50E-08 | 454846 |
| Leg fat mass (right) | rs147730268 | 12 | 123024476 | T | G | -0.0322196 | 0.00290449 | 0.087264 | 1.40E-28 | 454846 |
| Leg fat mass (right) | rs2292238 | 12 | 56493822 | C | A | -0.0107747 | 0.00163292 | 0.407674 | 4.20E-11 | 454846 |
| Leg fat mass (right) | rs10878349 | 12 | 66327632 | G | A | -0.00927479 | 0.00160702 | 0.51311 | 7.90E-09 | 454846 |
| Leg fat mass (right) | rs12427047 | 12 | 90213070 | T | C | -0.0152866 | 0.00186881 | 0.242764 | 2.80E-16 | 454846 |
| Leg fat mass (right) | rs2111281 | 12 | 108165360 | C | A | 0.0110046 | 0.00166423 | 0.36694 | 3.80E-11 | 454846 |
| Leg fat mass (right) | rs79246548 | 12 | 121707488 | A | T | -0.0197228 | 0.00361626 | 0.051921 | 4.90E-08 | 454846 |
| Leg fat mass (right) | rs1814592 | 12 | 122438187 | A | G | -0.0118904 | 0.00176696 | 0.290036 | 1.70E-11 | 454846 |
| Leg fat mass (right) | rs76895963 | 12 | 4384844 | G | T | 0.0470516 | 0.00621301 | 0.02066 | 3.60E-14 | 454846 |
| Leg fat mass (right) | rs7966251 | 12 | 103731395 | A | G | -0.0115956 | 0.00184151 | 0.255019 | 3.00E-10 | 454846 |
| Leg fat mass (right) | rs12316080 | 12 | 124438217 | T | C | 0.0112742 | 0.00169592 | 0.335379 | 3.00E-11 | 454846 |
| Leg fat mass (right) | rs55726687 | 12 | 991306 | A | G | 0.0188903 | 0.00196662 | 0.209744 | 7.60E-22 | 454846 |
| Leg fat mass (right) | rs11105842 | 12 | 91243910 | A | G | -0.0111013 | 0.00167038 | 0.367522 | 3.00E-11 | 454846 |
| Leg fat mass (right) | rs3764002 | 12 | 108618630 | T | C | -0.0151401 | 0.00182314 | 0.26151 | 1.00E-16 | 454846 |
| Leg fat mass (right) | rs900448 | 12 | 133404805 | G | C | 0.0112931 | 0.00173746 | 0.307467 | 8.00E-11 | 454846 |
| Leg fat mass (right) | rs9568867 | 13 | 54107352 | A | G | 0.0226031 | 0.0024107 | 0.129188 | 6.80E-21 | 454846 |
| Leg fat mass (right) | rs4055791 | 13 | 59266053 | T | C | -0.0124059 | 0.001628 | 0.416769 | 2.50E-14 | 454846 |
| Leg fat mass (right) | rs11619722 | 13 | 27998600 | C | T | -0.0133897 | 0.00175109 | 0.300947 | 2.10E-14 | 454846 |
| Leg fat mass (right) | rs9571687 | 13 | 67472713 | A | C | -0.0101682 | 0.00170991 | 0.329434 | 2.70E-09 | 454846 |
| Leg fat mass (right) | rs1441264 | 13 | 79580919 | A | G | 0.0134089 | 0.0016685 | 0.593693 | 9.20E-16 | 454846 |
| Leg fat mass (right) | rs61969510 | 13 | 86484025 | C | T | 0.0122554 | 0.00180368 | 0.279015 | 1.10E-11 | 454846 |
| Leg fat mass (right) | rs11841757 | 13 | 99242255 | G | A | -0.0127182 | 0.00187987 | 0.239514 | 1.30E-11 | 454846 |
| Leg fat mass (right) | rs9522183 | 13 | 111977280 | T | G | -0.01278 | 0.00162741 | 0.561737 | 4.10E-15 | 454846 |
| Leg fat mass (right) | rs56399737 | 13 | 33381721 | T | C | -0.010843 | 0.00161828 | 0.449165 | 2.10E-11 | 454846 |
| Leg fat mass (right) | rs6561937 | 13 | 58257667 | A | T | -0.0129116 | 0.00186739 | 0.753693 | 4.70E-12 | 454846 |
| Leg fat mass (right) | rs7321331 | 13 | 31015138 | A | G | 0.0125095 | 0.00184362 | 0.742302 | 1.20E-11 | 454846 |
| Leg fat mass (right) | rs2209514 | 13 | 42791689 | A | G | -0.0129282 | 0.00217082 | 0.164682 | 2.60E-09 | 454846 |
| Leg fat mass (right) | rs12877270 | 13 | 97047020 | A | G | 0.0108778 | 0.00162728 | 0.442075 | 2.30E-11 | 454846 |
| Leg fat mass (right) | rs9522279 | 13 | 112221296 | T | C | 0.0127248 | 0.00162746 | 0.42311 | 5.30E-15 | 454846 |
| Leg fat mass (right) | rs1268403 | 14 | 21976476 | C | T | -0.0112192 | 0.00199282 | 0.205021 | 1.80E-08 | 454846 |
| Leg fat mass (right) | rs12890931 | 14 | 69753369 | G | T | 0.0113571 | 0.00167896 | 0.362429 | 1.30E-11 | 454846 |
| Leg fat mass (right) | rs6575340 | 14 | 94023972 | A | G | 0.0155138 | 0.00167128 | 0.636027 | 1.70E-20 | 454846 |
| Leg fat mass (right) | rs61992671 | 14 | 101531854 | G | A | -0.0124345 | 0.00167737 | 0.492056 | 1.20E-13 | 454846 |
| Leg fat mass (right) | rs2143975 | 14 | 33297398 | G | C | -0.0137647 | 0.00161936 | 0.53301 | 1.90E-17 | 454846 |
| Leg fat mass (right) | rs79197301 | 14 | 41327292 | A | T | 0.018048 | 0.00291585 | 0.08257 | 6.00E-10 | 454846 |
| Leg fat mass (right) | rs9788550 | 14 | 29681138 | C | G | -0.0178822 | 0.00186581 | 0.247498 | 9.30E-22 | 454846 |
| Leg fat mass (right) | rs12881629 | 14 | 101146413 | G | A | 0.0191482 | 0.0029096 | 0.082644 | 4.70E-11 | 454846 |
| Leg fat mass (right) | rs4430672 | 14 | 63094407 | C | T | -0.0118242 | 0.00201238 | 0.800932 | 4.20E-09 | 454846 |
| Leg fat mass (right) | rs12889080 | 14 | 47291881 | C | T | -0.0123514 | 0.00160603 | 0.503411 | 1.50E-14 | 454846 |
| Leg fat mass (right) | rs143121872 | 14 | 47893217 | C | T | -0.0338887 | 0.00582797 | 0.022531 | 6.10E-09 | 454846 |
| Leg fat mass (right) | rs922654 | 14 | 56472715 | C | T | 0.00911076 | 0.00162147 | 0.543356 | 1.90E-08 | 454846 |
| Leg fat mass (right) | rs217672 | 14 | 62361021 | C | A | 0.0133941 | 0.00180773 | 0.271729 | 1.30E-13 | 454846 |
| Leg fat mass (right) | rs8020365 | 14 | 79937216 | A | T | 0.0225094 | 0.00194179 | 0.220416 | 4.50E-31 | 454846 |
| Leg fat mass (right) | rs113624107 | 14 | 88326386 | A | G | 0.0112679 | 0.00191976 | 0.225895 | 4.40E-09 | 454846 |
| Leg fat mass (right) | rs3803286 | 14 | 103246470 | G | A | -0.0147245 | 0.00170094 | 0.666749 | 4.90E-18 | 454846 |
| Leg fat mass (right) | rs4924136 | 15 | 37593459 | A | G | -0.00945695 | 0.0017252 | 0.316381 | 4.20E-08 | 454846 |
| Leg fat mass (right) | rs6495017 | 15 | 73089625 | A | T | -0.015212 | 0.00188715 | 0.238296 | 7.60E-16 | 454846 |
| Leg fat mass (right) | rs34769775 | 15 | 80989172 | T | C | -0.0133998 | 0.0017562 | 0.297427 | 2.30E-14 | 454846 |
| Leg fat mass (right) | rs11071646 | 15 | 62273994 | A | G | -0.029863 | 0.00546787 | 0.02212 | 4.70E-08 | 454846 |
| Leg fat mass (right) | rs17270216 | 15 | 60836794 | G | A | -0.0109436 | 0.00198766 | 0.215049 | 3.70E-08 | 454846 |
| Leg fat mass (right) | rs4776970 | 15 | 68080886 | T | A | -0.019752 | 0.0016714 | 0.357817 | 3.20E-32 | 454846 |
| Leg fat mass (right) | rs9944241 | 15 | 51898058 | C | T | -0.0123709 | 0.00167261 | 0.484334 | 1.40E-13 | 454846 |
| Leg fat mass (right) | rs4842920 | 15 | 84539424 | T | G | -0.0180046 | 0.00179154 | 0.280031 | 9.20E-24 | 454846 |
| Leg fat mass (right) | rs2169935 | 15 | 95273039 | T | C | -0.00966941 | 0.00161099 | 0.491698 | 1.90E-09 | 454846 |
| Leg fat mass (right) | rs11854132 | 15 | 99229330 | A | G | -0.0126168 | 0.00180938 | 0.270198 | 3.10E-12 | 454846 |
| Leg fat mass (right) | rs2120450 | 15 | 53101580 | A | T | 0.0151289 | 0.00229449 | 0.144779 | 4.30E-11 | 454846 |
| Leg fat mass (right) | rs41350349 | 15 | 99285380 | A | G | 0.0111694 | 0.00202914 | 0.194326 | 3.70E-08 | 454846 |
| Leg fat mass (right) | rs879620 | 16 | 4015729 | T | C | 0.019202 | 0.00165072 | 0.613278 | 2.80E-31 | 454846 |
| Leg fat mass (right) | rs61742688 | 16 | 19883364 | A | G | -0.0174142 | 0.00231858 | 0.140975 | 5.90E-14 | 454846 |
| Leg fat mass (right) | rs56094641 | 16 | 53806453 | G | A | 0.052643 | 0.00163282 | 0.404646 | 1.00E-200 | 454846 |
| Leg fat mass (right) | rs862320 | 16 | 69651866 | T | C | -0.0142422 | 0.00163219 | 0.409785 | 2.60E-18 | 454846 |
| Leg fat mass (right) | rs7206608 | 16 | 82872628 | G | C | 0.0112816 | 0.00171713 | 0.32156 | 5.00E-11 | 454846 |
| Leg fat mass (right) | rs11075252 | 16 | 9332571 | G | A | -0.00999366 | 0.00178115 | 0.284541 | 2.00E-08 | 454846 |
| Leg fat mass (right) | rs803973 | 16 | 25660607 | A | G | 0.00955878 | 0.00164034 | 0.600964 | 5.60E-09 | 454846 |
| Leg fat mass (right) | rs8059619 | 16 | 29925445 | T | C | 0.0163899 | 0.00160778 | 0.546964 | 2.10E-24 | 454846 |
| Leg fat mass (right) | rs274111 | 16 | 24870653 | G | A | 0.0098472 | 0.001695 | 0.649683 | 6.30E-09 | 454846 |
| Leg fat mass (right) | rs2726036 | 16 | 28347140 | C | A | 0.021874 | 0.00164054 | 0.398071 | 1.50E-40 | 454846 |
| Leg fat mass (right) | rs12920259 | 16 | 30881299 | A | G | -0.00965309 | 0.00164618 | 0.61104 | 4.50E-09 | 454846 |
| Leg fat mass (right) | rs9673839 | 16 | 76895693 | G | A | 0.00977354 | 0.00161186 | 0.490974 | 1.30E-09 | 454846 |
| Leg fat mass (right) | rs1057042 | 16 | 89857622 | C | T | -0.0107624 | 0.00171223 | 0.326584 | 3.30E-10 | 454846 |
| Leg fat mass (right) | rs12926311 | 16 | 406427 | C | G | -0.0107746 | 0.00168203 | 0.353551 | 1.50E-10 | 454846 |
[truncated: 538,106 more chars]
